# Supplementary material for: Association of genetic variation in COL11A1 with adolescent idiopathic scoliosis
Source: eLife. 2024 Jan 26;12:RP89762. doi: 10.7554/eLife.89762 (PMC10945706; doi:10.7554/eLife.89762)
Supplement: Supplementary file 1. [file elife-89762-supp1.xlsx]

## Sheet: Variants
Variant	rsID	CHR	BP	RefAlele	AltAllele	Risk_Allele	Asso_P	OR_RA	OR_RA_Lo	OR_RA_Up	Gene	Variant Type	AAChange	gnomAD_genome_NFE	Polyphen2	CADD	GERP	Interpro_domain
1:103379918:G:A	rs3753841	1	103379918	G	A	A	1.165e-06	1.237	1.13401	1.34749	COL11A1	nonsynonymous SNV	COL11A1:NM_080630:exon50:c.C3620T:p.P1207L,COL11A1:NM_001190709:exon51:c.C3851T:p.P1284L,COL11A1:NM_001854:exon52:c.C3968T:p.P1323L,COL11A1:NM_080629:exon52:c.C4004T:p.P1335L	0.6284	0.104	26.7	5.75	.
14:23312594:G:A	rs1042704	14	23312594	G	A	A	1.893e-05	1.238	1.1252	1.36348	MMP14	nonsynonymous SNV	MMP14:NM_004995:exon5:c.G817A:p.D273N	0.2127	0.005	21.8	5.6	Metallopeptidase, catalytic domain|Peptidase M10, metallopeptidase|Peptidase, metallopeptidase
8:52321843:G:C	rs11992240	8	52321843	G	C	G	0.0001862	1.35685	1.15069	1.59942	PXDNL	nonsynonymous SNV	PXDNL:NM_144651:exon17:c.C2341G:p.R781G	0.0836	1	24.1	2.44	.
8:52321686:C:T	rs11985241	8	52321686	C	T	C	0.0002896	1.34409	1.14038	1.58509	PXDNL	nonsynonymous SNV	PXDNL:NM_144651:exon17:c.G2498A:p.S833N	0.0833	0.118	11.24	2.63	.
8:52325767:T:G	rs16916207	8	52325767	T	G	T	0.0003079	1.34228	1.13924	1.5835	PXDNL	nonsynonymous SNV	PXDNL:NM_144651:exon15:c.A1847C:p.D616A	0.0837	0.129	22.2	3.61	.
12:9316773:T:C	rs3213831	12	9316773	T	C	T	0.0006846	1.16009	1.06371	1.26395	PZP	nonsynonymous SNV	PZP:NM_002864:exon20:c.A2570G:p.N857S	0.4	0.949	18.56	1.37	Immunoglobulin E-set
1:152128121:G:A	rs72696940	1	152128121	G	A	G	0.0007141	1.23457	1.08933	1.39995	RPTN	nonsynonymous SNV	RPTN:NM_001122965:exon3:c.C1454T:p.S485F	0.138	0.998	0.202	-2.79	.
1:175046789:A:G	rs2072032	1	175046789	A	G	G	0.002157	1.14	1.04783	1.24021	TNN	nonsynonymous SNV	TNN:NM_022093:exon2:c.A235G:p.R79G	0.5063	0	0.004	0.071	.
2:20202930:G:A	rs77245812	2	20202930	G	A	A	0.002664	1.556	1.18015	2.05107	MATN3	nonsynonymous SNV	MATN3:NM_002381:exon3:c.C908T:p.T303M	0.0162	1	32	5.5	EGF-like calcium-binding domain|EGF-like domain|EGF-like, conserved site|Growth factor receptor cysteine-rich domain
9:78936358:G:A	rs1110222	9	78936358	G	A	G	0.002714	1.14155	1.04682	1.24389	PCSK5	nonsynonymous SNV	PCSK5:NM_001190482:exon30:c.G3824A:p.G1275D	0.3338	.	3.227	4.61	Growth factor receptor cysteine-rich domain
9:78936492:A:G	rs1110223	9	78936492	A	G	A	0.002721	1.14155	1.04682	1.24389	PCSK5	nonsynonymous SNV	PCSK5:NM_001190482:exon30:c.A3958G:p.K1320E	0.3332	.	8.974	4.78	Growth factor receptor cysteine-rich domain
16:21222672:C:A	rs2075520	16	21222672	C	A	C	0.003381	1.14811	1.0449	1.26122	ZP2	nonsynonymous SNV	ZP2:NM_001290104:exon3:c.G107T:p.G36V,ZP2:NM_003460:exon3:c.G107T:p.G36V	0.2955	0	0.816	2.42	.
15:71952899:G:A	rs72742760	15	71952899	G	A	G	0.003646	1.99203	1.19885	3.30898	THSD4	nonsynonymous SNV	THSD4:NM_001286429:exon2:c.G103A:p.D35N,THSD4:NM_024817:exon7:c.G1183A:p.D395N	0.0114	0.998	23	3.83	.
19:41847860:G:A	rs1800472	19	41847860	G	A	G	0.003752	1.55521	1.13365	2.13093	TGFB1	nonsynonymous SNV	TGFB1:NM_000660:exon5:c.C788T:p.T263I	0.0299	0.14	19.4	4.96	.
3:44948479:C:T	rs3749195	3	44948479	C	T	T	0.004274	1.125	1.03836	1.2194	TGM4	nonsynonymous SNV	TGM4:NM_003241:exon10:c.C1114T:p.R372C	0.4906	0.98	23.8	2.03	Transglutaminase-like
20:44640225:A:G	rs17576	20	44640225	A	G	A	0.004557	1.13636	1.0406	1.24135	MMP9	nonsynonymous SNV	MMP9:NM_004994:exon6:c.A836G:p.Q279R	0.378	0.004	16.53	2.71	Fibronectin, type II, collagen-binding|Kringle-like fold|Peptidase M10, metallopeptidase|Peptidase, metallopeptidase
11:47611940:C:G	rs142453721	11	47611940	C	G	C	0.00491	1.36986	1.0916	1.72006	C1QTNF4	nonsynonymous SNV	C1QTNF4:NM_031909:exon2:c.G423C:p.Q141H	0.049	0.918	12.39	3.57	C1q domain|Tumour necrosis factor-like domain
19:9058942:C:T	rs1833778	19	9058942	C	T	T	0.005114	1.125	1.03632	1.22179	MUC16	nonsynonymous SNV	MUC16:NM_024690:exon3:c.G28504A:p.A9502T	0.4478	0	0.861	-4.58	.
19:9049149:G:A	rs12461007	19	9049149	G	A	G	0.005206	1.13766	1.0396	1.24503	MUC16	nonsynonymous SNV	MUC16:NM_024690:exon5:c.C32482T:p.P10828S	0.3111	0.041	0.005	-5.99	.
3:44948590:G:A	rs9876921	3	44948590	G	A	A	0.005269	1.122	1.03525	1.21575	TGM4	nonsynonymous SNV	TGM4:NM_003241:exon10:c.G1225A:p.V409I	0.4897	0.002	0.002	-4.07	Transglutaminase-like
15:84639350:C:T	rs2277849	15	84639350	C	T	T	0.005448	1.139	1.04064	1.24628	ADAMTSL3	nonsynonymous SNV	ADAMTSL3:NM_001301110:exon20:c.C2605T:p.L869F,ADAMTSL3:NM_207517:exon20:c.C2605T:p.L869F	0.2795	0.606	23.4	2.38	.
19:9056941:A:G	rs10410136	19	9056941	A	G	A	0.005454	1.13636	1.03857	1.24379	MUC16	nonsynonymous SNV	MUC16:NM_024690:exon3:c.T30505C:p.F10169L	0.3109	0.006	4.701	-0.497	.
17:37224211:C:T	rs75117355	17	37224211	C	T	T	0.005456	1.236	1.06716	1.4319	PLXDC1	nonsynonymous SNV	PLXDC1:NM_020405:exon14:c.G1385A:p.R462H	0.0653	1	34	5.27	.
19:9057721:C:T	rs2216662	19	9057721	C	T	T	0.005551	1.124	1.03529	1.22057	MUC16	nonsynonymous SNV	MUC16:NM_024690:exon3:c.G29725A:p.V9909I	0.4479	0.05	1.407	-4.85	.
9:78938186:G:C	rs2803429	9	78938186	G	C	G	0.005879	1.1325	1.03645	1.2364	PCSK5	nonsynonymous SNV	PCSK5:NM_001190482:exon31:c.G4240C:p.E1414Q	0.3432	.	0.002	-5.44	Growth factor receptor cysteine-rich domain
19:9048170:G:A	rs10417600	19	9048170	G	A	G	0.006015	1.13636	1.0355	1.24498	MUC16	nonsynonymous SNV	MUC16:NM_024690:exon5:c.C33461T:p.S11154F	0.3104	0.999	16.22	2.39	.
9:78938043:G:A	rs2495207	9	78938043	G	A	G	0.006099	1.13122	1.03645	1.2364	PCSK5	nonsynonymous SNV	PCSK5:NM_001190482:exon31:c.G4097A:p.R1366H	0.343	.	12.86	-1.45	Growth factor receptor cysteine-rich domain
19:9047267:C:T	rs10410169	19	9047267	C	T	C	0.006187	1.13379	1.03649	1.2413	MUC16	nonsynonymous SNV	MUC16:NM_024690:exon5:c.G34364A:p.G11455D	0.3114	0.536	7.675	0.877	.
19:9048035:G:C	rs10417358	19	9048035	G	C	G	0.006188	1.13379	1.03649	1.2413	MUC16	nonsynonymous SNV	MUC16:NM_024690:exon5:c.C33596G:p.A11199G	0.3107	0.478	8.293	1.44	.
5:127622491:T:C	rs32209	5	127622491	T	C	T	0.006506	1.3369	1.07513	1.66123	FBN2	nonsynonymous SNV	FBN2:NM_001999:exon55:c.A6931G:p.M2311V	0.0441	0	15.67	5.34	EGF-like calcium-binding domain|EGF-like calcium-binding, conserved site|EGF-like domain|Growth factor receptor cysteine-rich domain
20:61470065:G:A	rs142792529	20	61470065	G	A	A	0.00665	1.559	1.146	2.12064	COL9A3	nonsynonymous SNV	COL9A3:NM_001853:exon31:c.G1816A:p.A606T	0.0151	0.859	16.17	-0.781	.
9:133901819:C:A	rs2275137	9	133901819	C	A	C	0.007136	1.1655	1.0401	1.30562	LAMC3	nonsynonymous SNV	LAMC3:NM_006059:exon2:c.C521A:p.P174H	0.1645	0.206	12.48	4.97	Laminin, N-terminal
19:9028373:G:A	rs56396897	19	9028373	G	A	A	0.007418	1.125	1.03227	1.22659	MUC16	nonsynonymous SNV	MUC16:NM_024690:exon11:c.C36419T:p.T12140M	0.2991	1	22.8	2.63	SEA domain
16:19318942:G:A	rs150196116	16	19318942	G	A	G	0.007791	1.51286	1.10129	2.07824	CLEC19A	nonsynonymous SNV	CLEC19A:NM_001256720:exon4:c.G424A:p.V142I	0.0318	.	.	.	.
1:155175089:C:T	rs72704117	1	155175089	C	T	T	0.007905	1.432	1.10982	1.84744	THBS3	nonsynonymous SNV	THBS3:NM_001252607:exon3:c.G305A:p.R102Q,THBS3:NM_007112:exon3:c.G305A:p.R102Q	0.0168	0.985	34	4.85	Concanavalin A-like lectin/glucanase domain|Laminin G domain
3:44943389:G:A	rs1995641	3	44943389	G	A	A	0.007986	1.118	1.0291	1.21327	TGM4	nonsynonymous SNV	TGM4:NM_003241:exon8:c.G937A:p.E313K	0.4313	0.582	5.105	-3.6	Transglutaminase-like
2:33172879:T:C	rs62135680	2	33172879	T	C	T	0.008001	1.68067	1.11556	2.53106	LTBP1	nonsynonymous SNV	LTBP1:NM_206943:exon1:c.T488C:p.L163P	0.0189	0.015	26.8	3.52	.
12:9312951:G:A	rs57006764	12	9312951	G	A	A	0.008022	1.159	1.04102	1.29149	PZP	nonsynonymous SNV	PZP:NM_002864:exon24:c.C3008T:p.T1003M	0.1574	1	24	3.67	Terpenoid cyclases/protein prenyltransferase alpha-alpha toroid
1:156616814:C:G	rs115373136	1	156616814	C	G	C	0.009138	1.7094	1.10831	2.63573	BCAN	nonsynonymous SNV	BCAN:NM_021948:exon3:c.C313G:p.R105G,BCAN:NM_198427:exon3:c.C313G:p.R105G	0.0212	0.995	26.2	2.47	Immunoglobulin V-set domain|Immunoglobulin-like domain|Immunoglobulin-like fold
12:9013755:C:T	rs1860967	12	9013755	C	T	T	0.009409	1.118	1.02811	1.21687	A2ML1	nonsynonymous SNV	A2ML1:NM_001282424:exon17:c.C1891T:p.R631W,A2ML1:NM_144670:exon28:c.C3364T:p.R1122W	0.3719	0.919	24.7	0.387	Alpha-macroglobulin complement component|Terpenoid cyclases/protein prenyltransferase alpha-alpha toroid
22:43610207:A:G	rs138993	22	43610207	A	G	A	0.009927	1.1919	1.0426	1.36108	SCUBE1	nonsynonymous SNV	SCUBE1:NM_173050:exon16:c.T1942C:p.S648P	0.6963	0	14.13	3.81	Growth factor receptor cysteine-rich domain|Tyrosine-protein kinase ephrin type A/B receptor-like
1:150958836:A:G	rs267733	1	150958836	A	G	A	0.009949	1.16822	1.03608	1.31595	ANXA9	nonsynonymous SNV	ANXA9:NM_003568:exon8:c.A497G:p.D166G	0.1508	0.99	25.2	5.1	.
18:2890796:G:A	rs34307586	18	2890796	G	A	G	0.0105	1.38122	1.06848	1.78561	EMILIN2	nonsynonymous SNV	EMILIN2:NM_032048:exon4:c.G671A:p.R224Q	0.0388	0.068	13.06	2.68	.
3:45077123:G:A	rs13963	3	45077123	G	A	A	0.01088	1.113	1.02499	1.20843	CLEC3B	nonsynonymous SNV	CLEC3B:NM_001308394:exon3:c.G190A:p.G64S,CLEC3B:NM_003278:exon3:c.G316A:p.G106S	0.4115	0.099	10.13	-0.054	C-type lectin|C-type lectin fold|C-type lectin-like
1:103548497:A:C	rs11164663	1	103548497	A	C	A	0.01127	1.23153	1.04536	1.45301	COL11A1	nonsynonymous SNV	COL11A1:NM_001190709:exon2:c.T138G:p.D46E,COL11A1:NM_001854:exon2:c.T138G:p.D46E,COL11A1:NM_080629:exon2:c.T138G:p.D46E,COL11A1:NM_080630:exon2:c.T138G:p.D46E	0.0762	0	18.41	2.99	Concanavalin A-like lectin/glucanase domain|Laminin G domain
7:149517978:G:T	rs12536873	7	149517978	G	T	T	0.0115	1.283	1.06065	1.55134	SSPO	nonsynonymous SNV	SSPO:NM_198455:exon87:c.G12321T:p.Q4107H	0.1574	0.999	7.945	2.19	Trypsin Inhibitor-like, cysteine rich domain
9:137688701:A:G	rs61736966	9	137688701	A	G	G	0.01197	1.506	1.10987	2.04574	COL5A1	nonsynonymous SNV	COL5A1:NM_000093:exon36:c.A2852G:p.N951S,COL5A1:NM_001278074:exon36:c.A2852G:p.N951S	0.0181	0.001	18.1	3.57	.
9:133948049:A:G	rs2275140	9	133948049	A	G	G	0.01203	1.154	1.02975	1.29263	LAMC3	nonsynonymous SNV	LAMC3:NM_006059:exon19:c.A3244G:p.S1082G	0.8503	0	1.221	2.24	.
19:9024994:C:T	rs67631215	19	9024994	C	T	T	0.01252	1.111	1.02396	1.20722	MUC16	nonsynonymous SNV	MUC16:NM_024690:exon16:c.G36868A:p.E12290K	0.3339	0.009	20.9	1.51	SEA domain
1:177247854:C:G	rs3176443	1	177247854	C	G	C	0.01296	1.14679	1.02761	1.27987	BRINP2	nonsynonymous SNV	BRINP2:NM_021165:exon7:c.C1168G:p.L390V	0.1954	0	3.31	3.17	.
9:18777268:C:T	rs117786774	9	18777268	C	T	T	0.0133	1.318	1.06435	1.63173	ADAMTSL1	nonsynonymous SNV	ADAMTSL1:NM_001040272:exon19:c.C3041T:p.A1014V	0.0439	0	8.777	3.8	.
14:52507429:A:G	rs3742536	14	52507429	A	G	G	0.01374	1.131	1.02532	1.24732	NID2	nonsynonymous SNV	NID2:NM_007361:exon8:c.T1966C:p.S656P	0.7752	0	14.66	5.06	G2 nidogen/fibulin G2F|Green fluorescent protein|Green fluorescent protein-like
21:47423389:G:A	rs1053312	21	47423389	G	A	A	0.01402	1.154	1.02975	1.29263	COL6A1	nonsynonymous SNV	COL6A1:NM_001848:exon35:c.G2549A:p.R850H	0.3026	0.002	22.3	0.709	von Willebrand factor, type A
15:100692953:G:A	rs72755233	15	100692953	G	A	G	0.01555	1.18906	1.03037	1.37174	ADAMTS17	nonsynonymous SNV	ADAMTS17:NM_139057:exon10:c.C1337T:p.T446I	0.115	0.072	20.6	4.6	Metallopeptidase, catalytic domain|Peptidase M12B, ADAM/reprolysin
19:9080462:C:G	rs2547065	19	9080462	C	G	G	0.01586	1.116	1.02004	1.2216	MUC16	nonsynonymous SNV	MUC16:NM_024690:exon2:c.G9569C:p.S3190T	0.5819	0	0.931	0.926	.
3:142548560:A:G	rs35692900	3	142548560	A	G	A	0.01587	1.30039	1.04239	1.62333	PCOLCE2	nonsynonymous SNV	PCOLCE2:NM_013363:exon6:c.T839C:p.V280A	0.0412	0.036	2.057	3.98	.
15:90771750:T:G	rs3751655	15	90771750	T	G	G	0.01593	1.117	1.02004	1.2216	SEMA4B	nonsynonymous SNV	SEMA4B:NM_001324029:exon13:c.T1975G:p.S659A,SEMA4B:NM_001324030:exon14:c.T1921G:p.S641A,SEMA4B:NM_001324034:exon14:c.T2419G:p.S807A,SEMA4B:NM_198925:exon14:c.T2389G:p.S797A,SEMA4B:NM_001324031:exon15:c.T2548G:p.S850A,SEMA4B:NM_001324033:exon15:c.T1921G:p.S641A,SEMA4B:NM_020210:exon15:c.T2389G:p.S797A	0.6269	0.002	2.16	2.86	.
3:47618953:C:A	rs3732530	3	47618953	C	A	A	0.01645	1.119	1.0211	1.22767	CSPG5	nonsynonymous SNV	CSPG5:NM_001206942:exon2:c.G149T:p.G50V,CSPG5:NM_001206943:exon2:c.G563T:p.G188V,CSPG5:NM_001206944:exon2:c.G563T:p.G188V,CSPG5:NM_001206945:exon2:c.G149T:p.G50V,CSPG5:NM_006574:exon2:c.G563T:p.G188V	0.6801	0.028	18.32	0.844	Chondroitin sulphate attachment
19:9057750:T:A	rs12982113	19	9057750	T	A	T	0.01684	1.11359	1.01898	1.21555	MUC16	nonsynonymous SNV	MUC16:NM_024690:exon3:c.A29696T:p.Y9899F	0.3479	0	0.156	-1	.
19:9070402:G:T	rs12150888	19	9070402	G	T	G	0.0172	1.11732	1.01906	1.22522	MUC16	nonsynonymous SNV	MUC16:NM_024690:exon3:c.C17044A:p.P5682T	0.2977	0.998	0.002	-2.48	.
19:6665020:T:C	rs344560	19	6665020	T	C	C	0.01777	1.249	1.03442	1.50706	TNFSF14	nonsynonymous SNV	TNFSF14:NM_172014:exon4:c.A532G:p.K178E,TNFSF14:NM_003807:exon5:c.A640G:p.K214E	0.9408	0	4.615	2.32	Tumour necrosis factor domain|Tumour necrosis factor-like domain
16:70694000:C:A	rs4985556	16	70694000	C	A	A	0.01828	1.164	1.0279	1.31585	IL34	stopgain	IL34:NM_001172771:exon7:c.C636A:p.Y212X,IL34:NM_001172772:exon7:c.C639A:p.Y213X,IL34:NM_152456:exon7:c.C639A:p.Y213X	0.1042	.	33	0.394	.
6:54219326:G:A	rs3195579	6	54219326	G	A	A	0.01835	1.131	1.0213	1.25222	TINAG	nonsynonymous SNV	TINAG:NM_014464:exon9:c.G1142A:p.R381H	0.1719	0	14.8	2.85	Peptidase C1A, papain C-terminal
12:9346792:G:C	rs12230214	12	9346792	G	C	C	0.01854	1.123	1.02016	1.2362	PZP	nonsynonymous SNV	PZP:NM_002864:exon11:c.C1135G:p.L379V	0.263	0.041	0.014	0.366	.
1:86488232:G:A	rs641712	1	86488232	G	A	A	0.01893	1.113	1.01898	1.21555	COL24A1	nonsynonymous SNV	COL24A1:NM_001349955:exon17:c.C91T:p.P31S,COL24A1:NM_152890:exon17:c.C2191T:p.P731S	0.2826	0.242	23.9	4.7	.
19:9057896:G:C	rs12984471	19	9057896	G	C	G	0.01965	1.10988	1.01694	1.21313	MUC16	nonsynonymous SNV	MUC16:NM_024690:exon3:c.C29550G:p.D9850E	0.3474	0	6.082	-1.59	.
12:9317784:A:G	rs2277413	12	9317784	A	G	G	0.01966	1.116	1.01804	1.22399	PZP	nonsynonymous SNV	PZP:NM_002864:exon19:c.T2438C:p.V813A	0.2934	0.001	0.002	-0.929	Alpha-2-macroglobulin|Immunoglobulin E-set
19:9071916:G:A	rs35346115	19	9071916	G	A	G	0.01967	1.34771	1.04006	1.74494	MUC16	nonsynonymous SNV	MUC16:NM_024690:exon3:c.C15530T:p.T5177I	0.0282	0.995	0.178	0.563	.
19:9068990:G:T	rs35092547	19	9068990	G	T	G	0.01976	1.3459	1.04006	1.74494	MUC16	nonsynonymous SNV	MUC16:NM_024690:exon3:c.C18456A:p.H6152Q	0.0283	0.311	0.023	-2.71	.
3:48463799:T:G	rs114964512	3	48463799	T	G	T	0.02051	1.50376	1.04335	2.16314	PLXNB1	nonsynonymous SNV	PLXNB1:NM_001130082:exon5:c.A1360C:p.S454R,PLXNB1:NM_002673:exon5:c.A1360C:p.S454R	0.0141	0.995	27.2	5.69	Sema domain|WD40/YVTN repeat-like-containing domain
19:9074265:G:A	rs10406209	19	9074265	G	A	G	0.02073	1.11483	1.01702	1.22277	MUC16	nonsynonymous SNV	MUC16:NM_024690:exon3:c.C13181T:p.T4394I	0.297	0.871	1.282	0.509	.
14:95054012:A:G	rs6119	14	95054012	A	G	G	0.02082	1.17	1.02601	1.33418	SERPINA5	nonsynonymous SNV	SERPINA5:NM_000624:exon3:c.A313G:p.K105E	0.1108	0	0.003	2.01	Serpin domain
19:9059232:T:C	rs12710265	19	9059232	T	C	T	0.02159	1.10742	1.01491	1.2107	MUC16	nonsynonymous SNV	MUC16:NM_024690:exon3:c.A28214G:p.Q9405R	0.3465	0.018	0.065	-0.042	.
7:100205706:G:C	rs61739556	7	100205706	G	C	C	0.02221	1.54	1.0803	2.19627	PCOLCE	nonsynonymous SNV	PCOLCE:NM_002593:exon9:c.G1330C:p.A444P	0.0147	0.001	15.27	2.47	.
15:84706461:C:T	rs950169	15	84706461	C	T	C	0.02225	1.11607	1.01503	1.22517	ADAMTSL3	nonsynonymous SNV	ADAMTSL3:NM_207517:exon30:c.C4979T:p.T1660I	0.2589	0	20.8	-0.022	PLAC
6:31540757:A:C	rs2229092	6	31540757	A	C	C	0.02229	1.218	1.03087	1.4385	LTA	nonsynonymous SNV	LTA:NM_000595:exon3:c.A152C:p.H51P,LTA:NM_001159740:exon3:c.A152C:p.H51P	0.0632	0	0.022	-2.81	.
8:24261526:A:G	rs3765124	8	24261526	A	G	G	0.0225	1.106	1.01487	1.20592	ADAMDEC1	nonsynonymous SNV	ADAMDEC1:NM_001145272:exon12:c.A1094G:p.N365S,ADAMDEC1:NM_014479:exon13:c.A1331G:p.N444S,ADAMDEC1:NM_001145271:exon14:c.A1094G:p.N365S	0.4306	0.929	0.121	0.414	Disintegrin domain;Metallopeptidase, catalytic domain|Peptidase M12B, ADAM/reprolysin
1:152191469:C:T	rs150298716	1	152191469	C	T	C	0.02271	1.76056	1.05182	2.94904	HRNR	nonsynonymous SNV	HRNR:NM_001009931:exon3:c.G2636A:p.G879D	0.0207	0.198	4.043	1.04	.
2:228135631:C:T	rs28381984	2	228135631	C	T	T	0.02295	1.099	1.01373	1.19048	COL4A3	nonsynonymous SNV	COL4A3:NM_000091:exon25:c.C1721T:p.P574L	0.4817	0.999	26.1	5.8	.
15:89400680:A:G	rs28407189	15	89400680	A	G	G	0.02356	1.308	1.04352	1.63788	ACAN	nonsynonymous SNV	ACAN:NM_001135:exon12:c.A4864G:p.T1622A,ACAN:NM_013227:exon12:c.A4864G:p.T1622A	0.0201	0.04	1.339	0.469	.
19:9060059:A:C	rs12977368	19	9060059	A	C	A	0.0237	1.10619	1.01288	1.20828	MUC16	nonsynonymous SNV	MUC16:NM_024690:exon3:c.T27387G:p.D9129E	0.347	0.736	0.04	-1.19	.
19:9057468:T:A	rs78494460	19	9057468	T	A	A	0.02417	1.515	1.06835	2.14659	MUC16	nonsynonymous SNV	MUC16:NM_024690:exon3:c.A29978T:p.H9993L	0.0405	0.01	2.969	0.668	.
19:9077581:G:T	rs73011014	19	9077581	G	T	T	0.02417	1.145	1.01955	1.28485	MUC16	nonsynonymous SNV	MUC16:NM_024690:exon3:c.C9865A:p.P3289T	0.1417	0.995	4.028	-0.84	.
19:8669931:G:C	rs7255721	19	8669931	G	C	G	0.02422	1.19332	1.02441	1.3908	ADAMTS10	nonsynonymous SNV	ADAMTS10:NM_030957:exon4:c.C401G:p.T134S	0.7054	.	.	.	.
2:71036482:T:C	rs2287101	2	71036482	T	C	C	0.02424	1.27	1.03579	1.55712	CLEC4F	nonsynonymous SNV	CLEC4F:NM_173535:exon7:c.A1691G:p.K564R	0.0342	0	0.002	0.876	C-type lectin
19:9074073:G:A	rs72486387	19	9074073	G	A	A	0.02427	1.145	1.01955	1.28485	MUC16	nonsynonymous SNV	MUC16:NM_024690:exon3:c.C13373T:p.P4458L	0.1419	0.711	12.02	2.13	.
1:156146546:C:T	rs76381440	1	156146546	C	T	T	0.02441	1.377	1.05077	1.80485	SEMA4A	nonsynonymous SNV	SEMA4A:NM_001193302:exon13:c.C1648T:p.P550S,SEMA4A:NM_001193300:exon15:c.C2044T:p.P682S,SEMA4A:NM_001193301:exon15:c.C2044T:p.P682S,SEMA4A:NM_022367:exon15:c.C2044T:p.P682S	0.0156	0.036	16.71	4.26	.
19:9072975:G:A	rs17000816	19	9072975	G	A	A	0.02448	1.145	1.01857	1.28866	MUC16	nonsynonymous SNV	MUC16:NM_024690:exon3:c.C14471T:p.T4824M	0.1421	0.001	0.422	-1.54	.
6:7727271:G:A	rs111588693	6	7727271	G	A	G	0.02494	1.10254	1.0128	1.19875	BMP6	nonsynonymous SNV	BMP6:NM_001718:exon1:c.G83A:p.R28Q	0.4677	0.021	16.33	-1.66	.
18:61160287:T:C	rs2289519	18	61160287	T	C	T	0.02501	1.11235	1.013	1.22272	SERPINB5	nonsynonymous SNV	SERPINB5:NM_002639:exon5:c.T526C:p.S176P	0.6818	0	18.45	6.05	Serpin domain
6:159654539:G:A	rs142239017	6	159654539	G	A	G	0.02535	1.69779	1.03268	2.79502	FNDC1	nonsynonymous SNV	FNDC1:NM_032532:exon11:c.G2995A:p.G999S	0.0117	0.874	21.3	3.98	.
9:117808785:T:A	rs2104772	9	117808785	T	A	A	0.02538	1.098	1.01074	1.19163	TNC	nonsynonymous SNV	TNC:NM_002160:exon17:c.A5029T:p.I1677L	0.4356	0.004	17.21	3.42	Fibronectin type III|Immunoglobulin-like fold
14:95053863:C:T	rs6118	14	95053863	C	T	T	0.02575	1.163	1.01987	1.3262	SERPINA5	nonsynonymous SNV	SERPINA5:NM_000624:exon3:c.C164T:p.A55V	0.111	0.784	22.3	0.813	Serpin domain
9:33796690:TGAG:T	rs3831310	9	33796690	TGAG	T	TGAG	0.02607	1.14679	1.0156	1.29501	PRSS3	nonframeshift deletion	PRSS3:NM_001197098:exon2:c.70_72del:p.24_24del,PRSS3:NM_002771:exon2:c.91_93del:p.31_31del,PRSS3:NM_007343:exon2:c.262_264del:p.88_88del,PRSS3:NM_001197097:exon3:c.133_135del:p.45_45del	0.1957	.	.	.	.
1:152079989:T:G	rs1131471	1	152079989	T	G	T	0.02695	1.09649	1.01074	1.19163	TCHH	nonsynonymous SNV	TCHH:NM_007113:exon3:c.A5704C:p.K1902Q	0.4152	0	0.447	1.34	.
9:133936571:C:G	rs3739510	9	133936571	C	G	G	0.027	1.135	1.0124	1.27084	LAMC3	nonsynonymous SNV	LAMC3:NM_006059:exon13:c.C2308G:p.R770G	0.8388	0	11.61	-0.33	Laminin EGF domain
11:1027811:C:T	rs7481521	11	1027811	C	T	T	0.02707	1.141	1.0145	1.28351	MUC6	nonsynonymous SNV	MUC6:NM_005961:exon16:c.G1855A:p.V619M	0.548	0.99	14.39	1.73	Uncharacterised domain, cysteine-rich
7:75442723:G:A	rs11465293	7	75442723	G	A	G	0.02748	1.27226	1.02069	1.58331	CCL24	nonsynonymous SNV	CCL24:NM_002991:exon2:c.C92T:p.S31F	0.0498	0.053	7.199	1.8	Chemokine interleukin-8-like domain
1:152081921:G:C	rs2496253	1	152081921	G	C	G	0.02776	1.09769	1.00977	1.19516	TCHH	nonsynonymous SNV	TCHH:NM_007113:exon3:c.C3772G:p.L1258V	0.4154	0	10.68	3.14	.
1:150530548:C:G	rs56228576	1	150530548	C	G	C	0.02802	1.5674	1.03305	2.3809	ADAMTSL4	nonsynonymous SNV	ADAMTSL4:NM_019032:exon14:c.C2305G:p.L769V,ADAMTSL4:NM_025008:exon14:c.C2305G:p.L769V,ADAMTSL4:NM_001288607:exon15:c.C2188G:p.L730V,ADAMTSL4:NM_001288608:exon15:c.C2374G:p.L792V	0.0248	1	26.7	5.82	.
12:10137557:A:C	rs479499	12	10137557	A	C	C	0.02803	1.101	1.01082	1.2011	CLEC12A	nonsynonymous SNV	CLEC12A:NM_201623:exon5:c.A631C:p.K211Q,CLEC12A:NM_138337:exon6:c.A730C:p.K244Q,CLEC12A:NM_001207010:exon7:c.A760C:p.K254Q	0.626	0.112	0.001	-8.09	C-type lectin|C-type lectin fold|C-type lectin-like
6:30993440:G:A	rs115194949	6	30993440	G	A	G	0.0287	1.27226	1.01971	1.58801	MUC22	nonsynonymous SNV	MUC22:NM_001198815:exon3:c.G232A:p.A78T,MUC22:NM_001318484:exon3:c.G241A:p.A81T,MUC22:NM_001322469:exon3:c.G241A:p.A81T	0.0392	.	4.252	-2.44	.
1:152323132:G:T	rs12568784	1	152323132	G	T	G	0.02871	1.14025	1.01349	1.28223	FLG2	stopgain	FLG2:NM_001014342:exon3:c.C7130A:p.S2377X	0.143	.	36	0.129	.
12:10150974:A:G	rs2273986	12	10150974	A	G	A	0.02888	1.09769	1.00876	1.19397	CLEC1B	nonsynonymous SNV	CLEC1B:NM_016509:exon2:c.T70C:p.S24P	0.4591	0	0.003	1.28	.
1:152329435:C:T	rs2282303	1	152329435	C	T	C	0.02912	1.13636	1.01045	1.27839	FLG2	nonsynonymous SNV	FLG2:NM_001014342:exon3:c.G827A:p.R276Q	0.1457	0.005	0.726	3.44	.
12:40815007:C:G	rs80212515	12	40815007	C	G	G	0.03002	1.363	1.04031	1.7869	MUC19	.	.	0.0225	.	.	.	.
1:152331240:G:A	rs3818831	1	152331240	G	A	G	0.0306	1.13507	1.01142	1.27461	FLG2	nonsynonymous SNV	FLG2:NM_001014342:exon2:c.C121T:p.L41F	0.1442	0	11.02	5.26	EF-hand domain|EF-hand domain pair|S100/CaBP-9k-type, calcium binding, subdomain
1:152329369:C:G	rs2282302	1	152329369	C	G	G	0.0313	1.164	1.01491	1.33536	FLG2	nonsynonymous SNV	FLG2:NM_001014342:exon3:c.G893C:p.C298S	0.1963	0.965	13.98	2.4	.
7:12428803:G:A	rs848016	7	12428803	G	A	G	0.03156	1.09529	1.00872	1.18925	VWDE	nonsynonymous SNV	VWDE:NM_001135924:exon3:c.C425T:p.S142F,VWDE:NM_001346972:exon3:c.C425T:p.S142F	0.5437	0	1.115	3.5	.
18:21424991:C:A	rs17202961	18	21424991	C	A	C	0.03163	1.20337	1.0126	1.42972	LAMA3	nonsynonymous SNV	LAMA3:NM_001127717:exon30:c.C3622A:p.P1208T,LAMA3:NM_198129:exon30:c.C3622A:p.P1208T	0.0604	1	25.5	5.46	.
3:122632436:A:G	rs2276781	3	122632436	A	G	G	0.03175	1.265	1.0256	1.56005	SEMA5B	nonsynonymous SNV	SEMA5B:NM_001256348:exon15:c.T2051C:p.M684T,SEMA5B:NM_001031702:exon16:c.T2225C:p.M742T,SEMA5B:NM_001256346:exon16:c.T2225C:p.M742T,SEMA5B:NM_001256347:exon16:c.T2387C:p.M796T	0.0613	0	17.56	4.56	.
22:37581422:G:C	rs229526	22	37581422	G	C	C	0.03198	1.131	1.01134	1.26455	C1QTNF6	nonsynonymous SNV	C1QTNF6:NM_031910:exon2:c.C125G:p.P42R,C1QTNF6:NM_182486:exon2:c.C125G:p.P42R	0.2085	0.919	14.68	4.49	.
15:66411441:C:T	rs16949528	15	66411441	C	T	T	0.03231	1.13	1.01033	1.26329	MEGF11	nonsynonymous SNV	MEGF11:NM_032445:exon4:c.G284A:p.S95N	0.2879	0	16.29	1.74	EGF-like domain|EMI domain
1:207015957:T:C	rs2243191	1	207015957	T	C	C	0.03371	1.114	1.00807	1.23116	IL19	nonsynonymous SNV	IL19:NM_153758:exon6:c.T638C:p.F213S,IL19:NM_013371:exon7:c.T524C:p.F175S	0.7814	0	9.513	4.71	.
9:14816829:G:C	rs7041710	9	14816829	G	C	C	0.03412	1.151	1.01171	1.31044	FREM1	nonsynonymous SNV	FREM1:NM_144966:exon16:c.C2587G:p.L863V	0.1238	0.001	0.006	-4.39	.
19:9048342:C:T	rs10854118	19	9048342	C	T	T	0.03455	1.094	1.00771	1.18806	MUC16	nonsynonymous SNV	MUC16:NM_024690:exon5:c.G33289A:p.V11097M	0.3843	0.006	1.092	-0.543	.
7:100634476:C:G	rs6980143	7	100634476	C	G	C	0.03505	1.10742	1.00795	1.21662	MUC12	nonsynonymous SNV	MUC12:NM_001164462:exon2:c.C632G:p.T211S	0.5785	.	0.004	-1.05	.
19:9086145:G:C	rs45611441	19	9086145	G	C	G	0.03522	1.17096	1.00908	1.35929	MUC16	nonsynonymous SNV	MUC16:NM_024690:exon1:c.C5670G:p.N1890K	0.1153	0	1.292	0.225	.
4:79447763:T:C	rs34670941	4	79447763	T	C	T	0.03542	1.16279	1.00694	1.34055	FRAS1	nonsynonymous SNV	FRAS1:NM_025074:exon70:c.T10877C:p.V3626A	0.0999	0	0.318	-0.78	.
1:152382120:C:T	rs3829868	1	152382120	C	T	C	0.03558	1.13507	1.00646	1.27834	CRNN	nonsynonymous SNV	CRNN:NM_016190:exon3:c.G1438A:p.G480S	0.1375	0.18	14.26	4.01	.
17:65988049:T:C	rs9891146	17	65988049	T	C	C	0.03567	1.14	1.00755	1.28979	C17orf58	nonsynonymous SNV	C17orf58:NM_181655:exon3:c.A274G:p.I92V	0.7246	0	0.001	-4.59	Tissue inhibitor of metalloproteinases-like, OB-fold
5:5239309:G:A	rs68077031	5	5239309	G	A	A	0.03603	1.388	1.03256	1.8663	ADAMTS16	nonsynonymous SNV	ADAMTS16:NM_139056:exon15:c.G2200A:p.V734I	0.013	0.002	0.039	-7.13	.
7:49842377:A:C	rs79731913	7	49842377	A	C	C	0.03735	1.193	1.01442	1.4045	VWC2	nonsynonymous SNV	VWC2:NM_198570:exon3:c.A767C:p.Q256P	0.0539	0.081	23.3	5.32	VWFC domain
4:88766969:A:G	rs61731014	4	88766969	A	G	A	0.03749	1.35318	1.00606	1.81841	MEPE	nonsynonymous SNV	MEPE:NM_001184694:exon4:c.A949G:p.I317V,MEPE:NM_001291183:exon4:c.A1042G:p.I348V,MEPE:NM_020203:exon4:c.A949G:p.I317V,MEPE:NM_001184695:exon5:c.A610G:p.I204V,MEPE:NM_001184696:exon5:c.A610G:p.I204V,MEPE:NM_001184697:exon6:c.A610G:p.I204V	0.0273	0.031	0.002	-4.51	.
1:150484987:G:A	rs13294	1	150484987	G	A	G	0.038	1.0929	1.00473	1.1892	ECM1	nonsynonymous SNV	ECM1:NM_022664:exon7:c.G868A:p.G290S,ECM1:NM_001202858:exon8:c.G1324A:p.G442S,ECM1:NM_004425:exon8:c.G1243A:p.G415S	0.3924	0.003	9.411	4.17	.
15:79058730:A:G	rs189146505	15	79058730	A	G	G	0.03804	1.339	1.02376	1.75158	ADAMTS7	nonsynonymous SNV	ADAMTS7:NM_014272:exon19:c.T3523C:p.S1175P	0.0416	0	0.153	-0.01	.
1:156622252:G:A	rs1056695	1	156622252	G	A	A	0.03853	1.093	1.00473	1.1892	BCAN	nonsynonymous SNV	BCAN:NM_021948:exon8:c.G1510A:p.E504K,BCAN:NM_198427:exon8:c.G1510A:p.E504K	0.3714	0.172	9.231	2.81	.
9:18777196:A:C	rs41268983	9	18777196	A	C	C	0.03892	1.14	1.00755	1.28979	ADAMTSL1	nonsynonymous SNV	ADAMTSL1:NM_001040272:exon19:c.A2969C:p.E990A	0.1622	0.952	12.09	5.75	.
2:228131169:A:G	rs11677877	2	228131169	A	G	A	0.03924	1.17647	1.00521	1.37548	COL4A3	nonsynonymous SNV	COL4A3:NM_000091:exon22:c.A1352G:p.H451R	0.068	0.015	0.001	-4.09	.
6:161006172:T:G	rs41272110	6	161006172	T	G	T	0.03946	1.13766	1.00554	1.28721	LPA	nonsynonymous SNV	LPA:NM_005577:exon27:c.A4195C:p.T1399P	0.1377	0.996	18.9	2.41	Kringle|Kringle-like fold
9:78973431:G:A	rs72745135	9	78973431	G	A	A	0.04054	1.42	1.02798	1.96285	PCSK5	nonsynonymous SNV	PCSK5:NM_001190482:exon37:c.G5176A:p.E1726K	0.0115	.	28.2	5.88	Growth factor receptor cysteine-rich domain
8:98991221:A:G	rs1869609	8	98991221	A	G	G	0.0406	1.095	1.0028	1.19626	MATN2	nonsynonymous SNV	MATN2:NM_001317748:exon6:c.A1066G:p.K356E,MATN2:NM_002380:exon6:c.A1066G:p.K356E,MATN2:NM_030583:exon6:c.A1066G:p.K356E	0.6484	0.002	5.477	-2.27	EGF-like domain|EGF-like, conserved site;EGF-like domain|EGF-like, conserved site|Growth factor receptor cysteine-rich domain;von Willebrand factor, type A
19:9090784:C:T	rs73495785	19	9090784	C	T	C	0.04106	1.15473	1.00288	1.32992	MUC16	nonsynonymous SNV	MUC16:NM_024690:exon1:c.G1031A:p.R344K	0.1158	0.862	0.653	-1.38	.
1:150483355:C:T	rs3737240	1	150483355	C	T	C	0.04148	1.0917	1.00272	1.18682	ECM1	nonsynonymous SNV	ECM1:NM_001202858:exon6:c.C470T:p.T157M,ECM1:NM_004425:exon6:c.C389T:p.T130M,ECM1:NM_022664:exon6:c.C389T:p.T130M	0.388	0.994	0.135	-5.22	.
4:88732763:A:G	rs17013181	4	88732763	A	G	A	0.04193	1.10988	1.00308	1.22988	IBSP	nonsynonymous SNV	IBSP:NM_004967:exon7:c.A655G:p.R219G	0.2032	0	6.923	3.27	.
11:26587018:C:T	rs35317037	11	26587018	C	T	T	0.04283	1.423	1.024	1.97838	MUC15	nonsynonymous SNV	MUC15:NM_145650:exon2:c.G388A:p.D130N,MUC15:NM_001135091:exon3:c.G469A:p.D157N,MUC15:NM_001135092:exon3:c.G469A:p.D157N	0.011	0	0.003	-0.698	.
15:84582124:G:T	rs4842838	15	84582124	G	T	G	0.04372	1.08814	1.00168	1.18095	ADAMTSL3	nonsynonymous SNV	ADAMTSL3:NM_001301110:exon16:c.G1981T:p.V661L,ADAMTSL3:NM_207517:exon16:c.G1981T:p.V661L	0.5098	0	12.87	-1.79	.
3:183948663:G:A	rs1687225	3	183948663	G	A	G	0.04373	1.12233	1.00232	1.2582	VWA5B2	nonsynonymous SNV	VWA5B2:NM_138345:exon2:c.G268A:p.G90S	0.2218	0.01	15.11	1.98	VIT domain
19:9090182:T:C	rs17000957	19	9090182	T	C	T	0.04459	1.15207	1.00088	1.32726	MUC16	nonsynonymous SNV	MUC16:NM_024690:exon1:c.A1633G:p.T545A	0.1164	0.334	0.016	-1.35	.
2:228128568:G:A	rs34505188	2	228128568	G	A	G	0.04586	1.17371	1.00124	1.37542	COL4A3	nonsynonymous SNV	COL4A3:NM_000091:exon21:c.G1223A:p.R408H	0.0678	0.998	20.3	2.07	.
9:18639300:G:A	rs776755	9	18639300	G	A	G	0.04638	1.25156	0.997643	1.57202	ADAMTSL1	nonsynonymous SNV	ADAMTSL1:NM_001040272:exon7:c.G725A:p.S242N,ADAMTSL1:NM_052866:exon7:c.G725A:p.S242N	0.0415	0.915	16.8	4.87	ADAM-TS Spacer 1
19:9060541:C:T	rs11882256	19	9060541	C	T	T	0.0477	1.097	1.00184	1.19981	MUC16	nonsynonymous SNV	MUC16:NM_024690:exon3:c.G26905A:p.V8969M	0.2644	0.001	0.125	-5.24	.
3:52852538:G:T	rs4687657	3	52852538	G	T	T	0.04776	1.096	1.00184	1.19981	ITIH4	nonsynonymous SNV	ITIH4:NM_001166449:exon16:c.C2002A:p.P668T,ITIH4:NM_002218:exon18:c.C2092A:p.P698T	0.2899	0.011	8.514	1.62	.
10:98155678:G:A	rs41291628	10	98155678	G	A	A	0.04864	1.33	1.01066	1.74962	TLL2	nonsynonymous SNV	TLL2:NM_012465:exon12:c.C1484T:p.T495M	0.0159	1	17.83	3.52	CUB domain
1:175087729:T:C	rs6696455	1	175087729	T	C	C	0.04876	1.086	0.99968	1.17859	TNN	nonsynonymous SNV	TNN:NM_022093:exon11:c.T2419C:p.W807R	0.4394	0	0.002	0.856	Fibronectin type III|Immunoglobulin-like fold
1:103354135:G:C	rs139064549	1	103354135	G	C	G	0.04877	1.47275	0.98338	2.20507	COL11A1	nonsynonymous SNV	COL11A1:NM_080630:exon60:c.C4258G:p.P1420A,COL11A1:NM_001190709:exon61:c.C4489G:p.P1497A,COL11A1:NM_001854:exon62:c.C4606G:p.P1536A,COL11A1:NM_080629:exon62:c.C4642G:p.P1548A	0.013	0.999	23.9	5.67	.
19:9085958:A:G	rs1108380	19	9085958	A	G	A	0.04949	1.14943	0.997882	1.32329	MUC16	nonsynonymous SNV	MUC16:NM_024690:exon1:c.T5857C:p.S1953P	0.1158	0.945	11.09	0.235	.
19:9083791:G:A	rs60106152	19	9083791	G	A	G	0.05013	1.14943	0.997882	1.32329	MUC16	nonsynonymous SNV	MUC16:NM_024690:exon1:c.C8024T:p.S2675L	0.116	0	0.022	-0.47	.
1:150737220:A:G	rs41271951	1	150737220	A	G	A	0.05014	1.16822	0.997244	1.36993	CTSS	nonsynonymous SNV	CTSS:NM_001199739:exon2:c.T20C:p.V7A,CTSS:NM_004079:exon2:c.T20C:p.V7A	0.0753	0	0.054	-1.64	.
19:9077196:C:T	rs7254941	19	9077196	C	T	T	0.05114	1.179	1.00232	1.38774	MUC16	nonsynonymous SNV	MUC16:NM_024690:exon3:c.G10250A:p.R3417Q	0.0601	0.95	5.004	-4.08	.
4:81952637:T:A	rs74764079	4	81952637	T	A	A	0.05145	1.333	1.00578	1.76869	BMP3	nonsynonymous SNV	BMP3:NM_001201:exon1:c.T199A:p.Y67N	0.024	1	24.5	3.46	Transforming growth factor-beta, N-terminal
3:50222926:T:A	rs1046956	3	50222926	T	A	T	0.05153	1.0929	0.998841	1.19621	SEMA3F	nonsynonymous SNV	SEMA3F:NM_001318798:exon13:c.T1210A:p.L404M,SEMA3F:NM_001318800:exon13:c.T1414A:p.L472M,SEMA3F:NM_004186:exon14:c.T1507A:p.L503M	0.6664	0.002	6.012	0.291	Sema domain|WD40/YVTN repeat-like-containing domain
4:169083694:A:C	rs6836994	4	169083694	A	C	C	0.05172	1.087	0.998721	1.18209	ANXA10	nonsynonymous SNV	ANXA10:NM_007193:exon4:c.A211C:p.M71L	0.5672	0	0.082	2.56	.
8:24356818:A:C	rs13259668	8	24356818	A	C	C	0.05177	1.091	1.00076	1.18915	ADAM7	nonsynonymous SNV	ADAM7:NM_003817:exon17:c.A1912C:p.N638H	0.324	0.001	0.005	-4.36	.
3:52861211:A:T	rs13072536	3	52861211	A	T	T	0.05203	1.1	0.998961	1.21051	ITIH4	nonsynonymous SNV	ITIH4:NM_001166449:exon3:c.T254A:p.I85N,ITIH4:NM_002218:exon3:c.T254A:p.I85N	0.252	0.957	24.3	3.03	VIT domain
1:236208773:C:T	rs10733133	1	236208773	C	T	C	0.05296	1.08578	0.99968	1.17859	NID1	nonsynonymous SNV	NID1:NM_002508:exon3:c.G736A:p.V246I	0.4215	0	0.131	-0.963	NIDO domain
8:121228679:A:C	rs4870723	8	121228679	A	C	A	0.05406	1.08342	0.997683	1.17624	COL14A1	nonsynonymous SNV	COL14A1:NM_021110:exon14:c.A1687C:p.N563H	0.468	0.482	0.45	2.85	Fibronectin type III|Immunoglobulin-like fold
6:116446576:A:G	rs1064583	6	116446576	A	G	A	0.05437	1.08578	0.997723	1.1809	COL10A1	nonsynonymous SNV	COL10A1:NM_000493:exon2:c.T80C:p.M27T	0.3768	0	0.087	6.06	.
8:24339679:G:A	rs13255694	8	24339679	G	A	A	0.0547	1.09	0.997802	1.19029	ADAM7	nonsynonymous SNV	ADAM7:NM_003817:exon9:c.G730A:p.V244M	0.3201	1	26.1	5.63	Metallopeptidase, catalytic domain|Peptidase M12B, ADAM/reprolysin
2:216300482:T:A	rs1250259	2	216300482	T	A	A	0.05492	1.104	0.997084	1.22253	FN1	nonsynonymous SNV	FN1:NM_001306129:exon1:c.A44T:p.Q15L,FN1:NM_001306130:exon1:c.A44T:p.Q15L,FN1:NM_001306131:exon1:c.A44T:p.Q15L,FN1:NM_001306132:exon1:c.A44T:p.Q15L,FN1:NM_002026:exon1:c.A44T:p.Q15L,FN1:NM_054034:exon1:c.A44T:p.Q15L,FN1:NM_212474:exon1:c.A44T:p.Q15L,FN1:NM_212476:exon1:c.A44T:p.Q15L,FN1:NM_212478:exon1:c.A44T:p.Q15L,FN1:NM_212482:exon1:c.A44T:p.Q15L	0.7365	0	13.69	5.35	.
7:100695138:G:A	rs73168398	7	100695138	G	A	A	0.05548	1.133	0.997603	1.28711	MUC17	nonsynonymous SNV	MUC17:NM_001040105:exon9:c.G12998A:p.R4333Q	0.1187	0.36	10.41	0.058	.
19:48495304:G:A	rs60213124	19	48495304	G	A	A	0.05558	1.171	0.997284	1.37537	BSPH1	nonsynonymous SNV	BSPH1:NM_001128326:exon1:c.C35T:p.T12M	0.2011	0.962	10.2	-0.642	.
10:102222957:G:C	rs3793771	10	102222957	G	C	G	0.05602	1.12613	0.996486	1.27064	WNT8B	nonsynonymous SNV	WNT8B:NM_003393:exon1:c.G32C:p.C11S	0.2239	0	11.22	4.72	.
18:61390515:T:C	rs34811964	18	61390515	T	C	T	0.05677	1.36799	0.978084	1.91202	SERPINB11	nonsynonymous SNV	SERPINB11:NM_001291279:exon7:c.T536C:p.I179T	0.0229	0.493	21	5.27	Serpin domain
6:75797302:C:T	rs970547	6	75797302	C	T	C	0.05689	1.10132	0.998002	1.2141	COL12A1	nonsynonymous SNV	COL12A1:NM_080645:exon50:c.G5680A:p.G1894S,COL12A1:NM_004370:exon65:c.G9172A:p.G3058S	0.7864	1	27.8	5.75	Fibronectin type III|Immunoglobulin-like fold
10:124358498:T:G	rs144489236	10	124358498	T	G	T	0.05712	1.4556	0.975466	2.17024	DMBT1	nonsynonymous SNV	DMBT1:NM_004406:exon16:c.T1668G:p.I556M,DMBT1:NM_017579:exon25:c.T3135G:p.I1045M,DMBT1:NM_001320644:exon26:c.T3165G:p.I1055M,DMBT1:NM_007329:exon26:c.T3165G:p.I1055M	0.0411	1	12.46	-0.309	SRCR domain|SRCR-like domain
1:231557164:C:G	rs61750991	1	231557164	C	G	C	0.05713	1.3947	0.978475	1.98925	EGLN1	nonsynonymous SNV	EGLN1:NM_022051:exon1:c.G471C:p.Q157H	0.0303	0.289	7.638	-2.39	.
10:124358583:C:T	rs2277244	10	124358583	C	T	C	0.0583	1.47275	0.97379	2.22679	DMBT1	nonsynonymous SNV	DMBT1:NM_004406:exon16:c.C1753T:p.H585Y,DMBT1:NM_017579:exon25:c.C3220T:p.H1074Y,DMBT1:NM_001320644:exon26:c.C3250T:p.H1084Y,DMBT1:NM_007329:exon26:c.C3250T:p.H1084Y	0.0291	0.999	20.9	3.57	SRCR domain|SRCR-like domain
9:14737506:T:G	rs10961689	9	14737506	T	G	T	0.0589	1.0929	0.995888	1.19736	FREM1	nonsynonymous SNV	FREM1:NM_001177704:exon14:c.A2036C:p.Q679P,FREM1:NM_144966:exon38:c.A6428C:p.Q2143P	0.718	0.001	1.924	-0.727	C-type lectin|C-type lectin fold|C-type lectin-like
7:100684550:A:G	rs35090328	7	100684550	A	G	G	0.05912	1.139	0.996725	1.30119	MUC17	nonsynonymous SNV	MUC17:NM_001040105:exon3:c.A9853G:p.S3285G	0.117	0.613	9.218	-2.19	.
6:30994470:C:G	rs116633440	6	30994470	C	G	C	0.05955	1.43678	0.969514	2.13179	MUC22	nonsynonymous SNV	MUC22:NM_001198815:exon3:c.C1262G:p.T421S,MUC22:NM_001318484:exon3:c.C1271G:p.T424S,MUC22:NM_001322469:exon3:c.C1271G:p.T424S	0.0144	.	1.797	1.94	.
6:30994617:C:G	rs115767504	6	30994617	C	G	C	0.05955	1.43678	0.969514	2.13179	MUC22	nonsynonymous SNV	MUC22:NM_001198815:exon3:c.C1409G:p.S470C,MUC22:NM_001318484:exon3:c.C1418G:p.S473C,MUC22:NM_001322469:exon3:c.C1418G:p.S473C	0.0142	.	0.182	1.63	.
2:238243292:G:A	rs1131296	2	238243292	G	A	G	0.05995	1.08342	0.996725	1.17972	COL6A3	nonsynonymous SNV	COL6A3:NM_057166:exon38:c.C7385T:p.T2462I,COL6A3:NM_057167:exon40:c.C8588T:p.T2863I,COL6A3:NM_004369:exon41:c.C9206T:p.T3069I	0.408	0.002	15.24	-1.13	Fibronectin type III|Immunoglobulin-like fold;von Willebrand factor, type A
8:104384780:A:G	rs6995597	8	104384780	A	G	G	0.06042	1.197	0.995769	1.43942	CTHRC1	nonsynonymous SNV	CTHRC1:NM_001256099:exon1:c.A1G:p.M1V	0.0513	.	1.468	0.983	.
11:103818395:T:C	rs35045740	11	103818395	T	C	T	0.06085	1.19048	0.987874	1.43362	PDGFD	nonsynonymous SNV	PDGFD:NM_025208:exon4:c.A568G:p.I190V,PDGFD:NM_033135:exon4:c.A550G:p.I184V	0.0591	0	1.209	1.74	.
20:44637624:C:T	rs1805088	20	44637624	C	T	C	0.06096	1.34228	0.975817	1.8487	MMP9	nonsynonymous SNV	MMP9:NM_004994:exon1:c.C59T:p.A20V	0.0192	0.355	9.445	2.59	.
19:9060915:C:T	rs59168469	19	9060915	C	T	C	0.0611	1.34409	0.975817	1.8487	MUC16	nonsynonymous SNV	MUC16:NM_024690:exon3:c.G26531A:p.R8844H	0.0231	0	9.346	-3.49	.
7:107720162:C:A	rs9690688	7	107720162	C	A	C	0.06178	1.17509	0.989575	1.39721	LAMB4	nonsynonymous SNV	LAMB4:NM_001318046:exon15:c.G1771T:p.V591F,LAMB4:NM_001318047:exon15:c.G1771T:p.V591F,LAMB4:NM_001318048:exon15:c.G1771T:p.V591F,LAMB4:NM_007356:exon15:c.G1771T:p.V591F	0.0583	0.93	25.2	1.51	Laminin IV type B
10:81697868:A:T	rs3088308	10	81697868	A	T	A	0.06204	1.16959	0.990446	1.38209	SFTPD	nonsynonymous SNV	SFTPD:NM_003019:exon8:c.T868A:p.S290T	0.0645	0.016	10.23	3.16	C-type lectin|C-type lectin fold|C-type lectin-like
3:183951431:C:T	rs902417	3	183951431	C	T	C	0.06224	1.10865	0.995212	1.23467	VWA5B2	nonsynonymous SNV	VWA5B2:NM_138345:exon4:c.C598T:p.P200S	0.242	0.19	11.01	1.99	.
1:155172725:T:C	rs35154152	1	155172725	T	C	C	0.06225	1.129	0.99557	1.27946	THBS3	nonsynonymous SNV	THBS3:NM_001252608:exon6:c.A475G:p.S159G,THBS3:NM_001252607:exon7:c.A808G:p.S270G,THBS3:NM_007112:exon8:c.A835G:p.S279G	0.0965	0.001	13.65	5.24	EGF-like domain;Laminin G domain
12:45108480:T:C	rs17574839	12	45108480	T	C	C	0.06228	1.171	0.994336	1.37669	NELL2	nonsynonymous SNV	NELL2:NM_001145108:exon10:c.A1039G:p.N347D,NELL2:NM_001145109:exon10:c.A1036G:p.N346D,NELL2:NM_001145107:exon11:c.A1189G:p.N397D,NELL2:NM_001145110:exon11:c.A1108G:p.N370D,NELL2:NM_006159:exon11:c.A1039G:p.N347D	0.0679	0.009	12.9	4.62	EGF-like domain
6:30995178:C:T	rs111413526	6	30995178	C	T	T	0.06234	1.126	0.994535	1.27313	MUC22	nonsynonymous SNV	MUC22:NM_001198815:exon3:c.C1970T:p.T657I,MUC22:NM_001318484:exon3:c.C1979T:p.T660I,MUC22:NM_001322469:exon3:c.C1979T:p.T660I	0.1307	.	0.002	-1.73	.
6:30995187:T:C	rs62399443	6	30995187	T	C	C	0.06234	1.126	0.994535	1.27313	MUC22	nonsynonymous SNV	MUC22:NM_001198815:exon3:c.T1979C:p.I660T,MUC22:NM_001318484:exon3:c.T1988C:p.I663T,MUC22:NM_001322469:exon3:c.T1988C:p.I663T	0.1456	.	0.147	0.625	.
6:30995297:A:G	rs62401664	6	30995297	A	G	G	0.06234	1.126	0.994535	1.27313	MUC22	nonsynonymous SNV	MUC22:NM_001198815:exon3:c.A2089G:p.I697V,MUC22:NM_001318484:exon3:c.A2098G:p.I700V,MUC22:NM_001322469:exon3:c.A2098G:p.I700V	0.1319	.	0.001	-3.2	.
6:30995532:T:C	rs62401665	6	30995532	T	C	C	0.06234	1.126	0.994535	1.27313	MUC22	nonsynonymous SNV	MUC22:NM_001198815:exon3:c.T2324C:p.M775T,MUC22:NM_001318484:exon3:c.T2333C:p.M778T,MUC22:NM_001322469:exon3:c.T2333C:p.M778T	0.1443	.	0.011	1.13	.
6:30996132:C:T	NA	6	30996132	C	T	T	0.06259	1.125	0.994535	1.27313	MUC22	nonsynonymous SNV	MUC22:NM_001198815:exon3:c.C2924T:p.T975I,MUC22:NM_001318484:exon3:c.C2933T:p.T978I,MUC22:NM_001322469:exon3:c.C2933T:p.T978I	0.1306	.	4.595	2.57	.
6:30996509:G:A	NA	6	30996509	G	A	A	0.06297	1.128	0.994575	1.27818	MUC22	nonsynonymous SNV	MUC22:NM_001198815:exon3:c.G3301A:p.E1101K,MUC22:NM_001318484:exon3:c.G3310A:p.E1104K,MUC22:NM_001322469:exon3:c.G3310A:p.E1104K	0.1278	.	8.123	-0.528	.
6:129813053:A:G	rs2244008	6	129813053	A	G	G	0.06301	1.168	0.994296	1.37125	LAMA2	nonsynonymous SNV	LAMA2:NM_001079823:exon56:c.A7894G:p.T2632A,LAMA2:NM_000426:exon57:c.A7906G:p.T2636A	0.0676	0.015	17.27	5.46	Concanavalin A-like lectin/glucanase domain|Laminin G domain
3:44948674:G:C	rs1395388	3	44948674	G	C	C	0.06377	1.209	0.992072	1.47397	TGM4	nonsynonymous SNV	TGM4:NM_003241:exon10:c.G1309C:p.E437Q	0.0581	0.059	0.001	-0.395	Transglutaminase-like
6:30997334:A:G	NA	6	30997334	A	G	G	0.064	1.125	0.994535	1.27313	MUC22	nonsynonymous SNV	MUC22:NM_001198815:exon3:c.A4126G:p.T1376A,MUC22:NM_001318484:exon3:c.A4135G:p.T1379A,MUC22:NM_001322469:exon3:c.A4135G:p.T1379A	0.1289	.	0.065	-1.36	.
19:9059181:G:A	rs12459532	19	9059181	G	A	G	0.06495	1.33869	0.971922	1.84132	MUC16	nonsynonymous SNV	MUC16:NM_024690:exon3:c.C28265T:p.P9422L	0.023	0.183	4.423	0.802	.
8:52323908:A:G	rs117864200	8	52323908	A	G	A	0.06547	1.43062	0.96279	2.12531	PXDNL	nonsynonymous SNV	PXDNL:NM_144651:exon16:c.T1964C:p.I655T	0.025	0	0.008	2.41	.
12:8278181:A:T	rs2024301	12	8278181	A	T	A	0.06566	1.09051	0.993899	1.19497	CLEC4A	nonsynonymous SNV	CLEC4A:NM_016184:exon2:c.A107T:p.H36L,CLEC4A:NM_194450:exon2:c.A107T:p.H36L	0.6741	0.97	0.404	-1.34	.
9:21206763:G:T	rs56035072	9	21206763	G	T	G	0.06662	1.11235	0.991397	1.24937	IFNA10	nonsynonymous SNV	IFNA10:NM_002171:exon1:c.C334A:p.L112I	0.1794	0.995	23.3	3.75	Four-helical cytokine, core|Four-helical cytokine-like, core
6:75834860:G:A	rs117038107	6	75834860	G	A	A	0.06673	1.394	0.98906	1.96403	COL12A1	nonsynonymous SNV	COL12A1:NM_080645:exon25:c.C3098T:p.T1033I,COL12A1:NM_004370:exon40:c.C6590T:p.T2197I	0.0113	0.012	17.97	3.35	Fibronectin type III|Immunoglobulin-like fold
9:101778272:A:C	rs35250850	9	101778272	A	C	A	0.06674	1.15075	0.989139	1.33766	COL15A1	nonsynonymous SNV	COL15A1:NM_001855:exon11:c.A1518C:p.E506D	0.0921	0.198	0.065	-1.03	.
19:9056982:G:A	rs11670318	19	9056982	G	A	A	0.06686	1.084	0.993779	1.18086	MUC16	nonsynonymous SNV	MUC16:NM_024690:exon3:c.C30464T:p.T10155I	0.303	0.997	1.347	0.467	.
7:73470714:G:A	rs2071307	7	73470714	G	A	G	0.06732	1.08108	0.99374	1.17619	ELN	nonsynonymous SNV	ELN:NM_001081752:exon19:c.G1234A:p.G412S,ELN:NM_001278914:exon19:c.G1249A:p.G417S,ELN:NM_001278916:exon19:c.G1222A:p.G408S,ELN:NM_001278917:exon19:c.G1234A:p.G412S,ELN:NM_000501:exon20:c.G1264A:p.G422S,ELN:NM_001081753:exon20:c.G1279A:p.G427S,ELN:NM_001081754:exon20:c.G1279A:p.G427S,ELN:NM_001081755:exon20:c.G1264A:p.G422S,ELN:NM_001278912:exon20:c.G1264A:p.G422S,ELN:NM_001278915:exon20:c.G1264A:…	0.3916	0.012	6.674	1.2	.
15:74219546:G:T	rs1048661	15	74219546	G	T	T	0.06871	1.088	0.993859	1.19025	LOXL1	nonsynonymous SNV	LOXL1:NM_005576:exon1:c.G422T:p.R141L	0.3224	0.914	29.8	4.1	.
5:127609633:G:A	rs2291628	5	127609633	G	A	G	0.06981	1.16009	0.986413	1.36572	FBN2	nonsynonymous SNV	FBN2:NM_001999:exon61:c.C7739T:p.S2580L	0.062	0.001	23.1	3.89	EGF-like calcium-binding domain|EGF-like calcium-binding, conserved site|EGF-like domain|Growth factor receptor cysteine-rich domain
7:100638705:G:C	rs77884908	7	100638705	G	C	C	0.07011	1.154	0.990169	1.34431	MUC12	nonsynonymous SNV	MUC12:NM_001164462:exon2:c.G4861C:p.G1621R	0.1332	.	0.234	-0.917	.
4:101401161:TAAC:T	rs367883693	4	101401161	TAAC	T	T	0.07145	1.137	0.989891	1.30756	EMCN	nonframeshift deletion	EMCN:NM_001159694:exon2:c.97_99del:p.33_33del,EMCN:NM_016242:exon2:c.97_99del:p.33_33del	0.0944	.	.	.	.
4:155491759:G:A	rs4220	4	155491759	G	A	G	0.07183	1.10375	0.991239	1.22974	FGB	nonsynonymous SNV	FGB:NM_001184741:exon8:c.G1256A:p.R419K,FGB:NM_005141:exon8:c.G1433A:p.R478K	0.2107	0	0.077	-2.97	Fibrinogen, alpha/beta/gamma chain, C-terminal globular domain|Fibrinogen, alpha/beta/gamma chain, C-terminal globular, subdomain 2
9:21187121:T:A	rs113045626	9	21187121	T	A	T	0.07213	1.11111	0.989416	1.24687	IFNA4	nonsynonymous SNV	IFNA4:NM_021068:exon1:c.A410T:p.E137V	0.1752	0.006	4.038	1.78	Four-helical cytokine, core|Four-helical cytokine-like, core
5:5182286:C:T	rs61748184	5	5182286	C	T	C	0.07308	1.41844	0.951382	2.11666	ADAMTS16	nonsynonymous SNV	ADAMTS16:NM_139056:exon4:c.C631T:p.P211S	0.0138	0.006	0.225	-5.34	.
11:17667439:G:C	rs11024357	11	17667439	G	C	G	0.0739	1.10865	0.989377	1.24195	OTOG	nonsynonymous SNV	OTOG:NM_001277269:exon55:c.G8726C:p.W2909S,OTOG:NM_001292063:exon56:c.G8690C:p.W2897S	0.2278	.	28.8	5.28	Cystine knot, C-terminal
1:54606804:C:T	rs3766465	1	54606804	C	T	T	0.07437	1.111	0.989416	1.24687	CDCP2	nonsynonymous SNV	CDCP2:NM_201546:exon3:c.G730A:p.G244R	0.847	0.999	28.4	5.57	CUB domain
19:9058907:G:C	rs1833777	19	9058907	G	C	C	0.07458	1.079	0.991754	1.17384	MUC16	nonsynonymous SNV	MUC16:NM_024690:exon3:c.C28539G:p.H9513Q	0.3506	0	0.009	-4.44	.
19:9046876:G:T	rs4804378	19	9046876	G	T	T	0.07513	1.1	0.991159	1.22004	MUC16	nonsynonymous SNV	MUC16:NM_024690:exon5:c.C34755A:p.S11585R	0.1804	0.299	4.096	-0.244	.
19:9049910:C:T	rs56307190	19	9049910	C	T	T	0.07517	1.1	0.991159	1.22004	MUC16	nonsynonymous SNV	MUC16:NM_024690:exon5:c.G31721A:p.R10574H	0.1805	0.009	10.04	-0.111	.
6:161007538:G:C	rs7765803	6	161007538	G	C	G	0.07579	1.08342	0.992826	1.18436	LPA	nonsynonymous SNV	LPA:NM_005577:exon26:c.C4072G:p.L1358V	0.3375	0.15	0.001	-2.6	Kringle|Kringle-like fold
6:161007496:G:C	rs7765781	6	161007496	G	C	G	0.07629	1.08342	0.991834	1.18317	LPA	nonsynonymous SNV	LPA:NM_005577:exon26:c.C4114G:p.L1372V	0.3374	0.073	0.002	-2.21	Kringle-like fold
19:9048320:C:T	rs56334501	19	9048320	C	T	T	0.07629	1.1	0.990208	1.22365	MUC16	nonsynonymous SNV	MUC16:NM_024690:exon5:c.G33311A:p.S11104N	0.1798	0.443	2.116	0.273	.
19:9056989:C:G	rs4804381	19	9056989	C	G	G	0.07658	1.099	0.991159	1.22004	MUC16	nonsynonymous SNV	MUC16:NM_024690:exon3:c.G30457C:p.E10153Q	0.1807	0.736	0.032	-0.7	.
18:21424986:T:C	rs12457323	18	21424986	T	C	C	0.07754	1.311	0.97918	1.756	LAMA3	nonsynonymous SNV	LAMA3:NM_001127717:exon30:c.T3617C:p.V1206A,LAMA3:NM_198129:exon30:c.T3617C:p.V1206A	0.0175	0	7.941	3.08	.
18:61170782:A:G	rs1455555	18	61170782	A	G	A	0.07784	1.07643	0.990723	1.16803	SERPINB5	nonsynonymous SNV	SERPINB5:NM_002639:exon7:c.A955G:p.I319V	0.4959	0	0.033	0.527	Serpin domain
7:100636461:C:A	rs113111921	7	100636461	C	A	A	0.07792	1.159	0.984442	1.36299	MUC12	nonsynonymous SNV	MUC12:NM_001164462:exon2:c.C2617A:p.P873T	0.0716	.	0.075	-0.639	.
15:89436244:T:C	rs8024779	15	89436244	T	C	C	0.07816	1.077	0.992707	1.17037	HAPLN3	nonsynonymous SNV	HAPLN3:NM_001307952:exon2:c.A100G:p.T34A	0.419	.	0.368	0.532	.
6:54186147:T:C	rs1058768	6	54186147	T	C	C	0.07899	1.08	0.990803	1.17732	TINAG	nonsynonymous SNV	TINAG:NM_014464:exon3:c.T472C:p.S158P	0.6578	0	10.65	5.53	.
7:100684593:G:A	rs35988443	7	100684593	G	A	A	0.07926	1.124	0.987716	1.27936	MUC17	nonsynonymous SNV	MUC17:NM_001040105:exon3:c.G9896A:p.S3299N	0.1187	0.008	8.901	-1.51	.
9:113192279:A:T	rs142508835	9	113192279	A	T	T	0.07964	1.224	0.980709	1.52727	SVEP1	nonsynonymous SNV	SVEP1:NM_153366:exon34:c.T5536A:p.S1846T	0.0372	0.709	22.6	4.96	Sushi/SCR/CCP domain
7:49815390:C:G	rs769604	7	49815390	C	G	C	0.07978	1.07875	0.989812	1.17614	VWC2	nonsynonymous SNV	VWC2:NM_198570:exon2:c.C359G:p.A120G	0.474	0	2.876	-9.54	.
10:81317045:G:T	rs1965708	10	81317045	G	T	T	0.08002	1.136	0.986966	1.30881	SFTPA2	nonsynonymous SNV	SFTPA2:NM_001320814:exon5:c.C697A:p.Q233K,SFTPA2:NM_001098668:exon6:c.C667A:p.Q223K,SFTPA2:NM_001320813:exon6:c.C667A:p.Q223K	0.2284	0	0.001	-3.22	C-type lectin|C-type lectin fold|C-type lectin-like
19:9083143:G:A	rs7245949	19	9083143	G	A	G	0.08027	1.08225	0.990842	1.18199	MUC16	nonsynonymous SNV	MUC16:NM_024690:exon1:c.C8672T:p.T2891I	0.339	0.991	0.68	0.773	.
19:9083174:G:A	rs7245960	19	9083174	G	A	G	0.08027	1.08225	0.990842	1.18199	MUC16	nonsynonymous SNV	MUC16:NM_024690:exon1:c.C8641T:p.P2881S	0.3388	0.001	0.001	-1.55	.
19:9058624:G:A	rs11878666	19	9058624	G	A	A	0.08077	1.098	0.989179	1.2176	MUC16	nonsynonymous SNV	MUC16:NM_024690:exon3:c.C28822T:p.P9608S	0.1807	0.039	1.443	-5	.
3:195506189:A:G	rs2432533	3	195506189	A	G	G	0.08127	1.386	0.967848	1.98314	MUC4	nonsynonymous SNV	MUC4:NM_018406:exon2:c.T12262C:p.S4088P	0.0318	0.797	12.56	.	.
7:100646055:A:G	rs147239420	7	100646055	A	G	A	0.08141	1.12613	0.985821	1.28696	MUC12	nonsynonymous SNV	MUC12:NM_001164462:exon2:c.A12211G:p.T4071A	0.5659	.	0.002	-1.8	.
5:135228165:G:A	rs2069885	5	135228165	G	A	G	0.0815	1.11607	0.985624	1.26173	IL9	nonsynonymous SNV	IL9:NM_000590:exon5:c.C350T:p.T117M	0.143	0.328	4.056	-1.62	.
3:48623124:G:A	rs35761247	3	48623124	G	A	A	0.08218	1.289	0.974062	1.70622	COL7A1	nonsynonymous SNV	COL7A1:NM_000094:exon30:c.C3830T:p.P1277L	0.0549	1	25.6	5.81	.
11:102649482:T:C	rs17860955	11	102649482	T	C	C	0.08226	1.287	0.975934	1.69615	MMP10	.	.	0.0169	.	22.7	3.25	.
6:30999997:T:C	rs10947121	6	30999997	T	C	C	0.08227	1.087	0.988981	1.19373	MUC22	nonsynonymous SNV	MUC22:NM_001198815:exon4:c.T4694C:p.L1565P,MUC22:NM_001318484:exon4:c.T4703C:p.L1568P,MUC22:NM_001322469:exon5:c.T4703C:p.L1568P	0.3718	.	0.357	0.332	.
7:100647819:C:T	rs11766024	7	100647819	C	T	C	0.08268	1.08932	0.989021	1.19846	MUC12	nonsynonymous SNV	MUC12:NM_001164462:exon2:c.C13975T:p.H4659Y	0.4405	.	0.002	-0.525	.
12:8667897:A:G	rs4304840	12	8667897	A	G	G	0.08345	1.088	0.989971	1.19492	CLEC4D	nonsynonymous SNV	CLEC4D:NM_080387:exon2:c.A94G:p.S32G	0.208	0.003	0.004	-0.299	.
6:6318795:C:A	rs5985	6	6318795	C	A	C	0.0844	1.08696	0.988032	1.19727	F13A1	nonsynonymous SNV	F13A1:NM_000129:exon2:c.G103T:p.V35L	0.2616	0	0.547	1.89	Immunoglobulin E-set|Immunoglobulin-like fold
3:44929287:G:C	rs2271087	3	44929287	G	C	C	0.08446	1.087	0.988981	1.19373	TGM4	nonsynonymous SNV	TGM4:NM_003241:exon3:c.G300C:p.E100D	0.3049	0.339	15.4	1.43	Immunoglobulin E-set|Immunoglobulin-like fold|Transglutaminase, N-terminal
19:9060085:C:T	rs4804382	19	9060085	C	T	T	0.08449	1.097	0.98819	1.21638	MUC16	nonsynonymous SNV	MUC16:NM_024690:exon3:c.G27361A:p.A9121T	0.1811	0	10.69	-0.777	.
19:9066874:G:T	rs12609150	19	9066874	G	T	T	0.08516	1.096	0.98819	1.21638	MUC16	nonsynonymous SNV	MUC16:NM_024690:exon3:c.C20572A:p.P6858T	0.1807	0.176	0.003	-2.96	.
15:43569097:C:T	rs146833656	15	43569097	C	T	T	0.08521	1.338	0.970019	1.84493	TGM7	nonsynonymous SNV	TGM7:NM_052955:exon12:c.G1936A:p.E646K	0.0124	0.996	32	5.13	Immunoglobulin-like fold|Transglutaminase, C-terminal
7:83037731:C:G	rs61729612	7	83037731	C	G	C	0.08522	1.11732	0.983734	1.26922	SEMA3E	nonsynonymous SNV	SEMA3E:NM_001178129:exon6:c.G443C:p.R148P,SEMA3E:NM_012431:exon6:c.G623C:p.R208P	0.1206	0	23.2	1.88	Sema domain|WD40/YVTN repeat-like-containing domain
11:74413955:G:A	rs35903991	11	74413955	G	A	G	0.08531	1.40252	0.938193	2.09552	CHRDL2	nonsynonymous SNV	CHRDL2:NM_001304417:exon6:c.C809T:p.P270L,CHRDL2:NM_001304391:exon7:c.C749T:p.P250L,CHRDL2:NM_001304415:exon7:c.C749T:p.P250L,CHRDL2:NM_001304416:exon7:c.C656T:p.P219L,CHRDL2:NM_001304390:exon8:c.C944T:p.P315L,CHRDL2:NM_001278473:exon9:c.C1004T:p.P335L,CHRDL2:NM_015424:exon9:c.C1004T:p.P335L	0.011	1	15.12	4.15	.
13:92345579:C:T	rs553717	13	92345579	C	T	C	0.08537	1.12486	0.981925	1.2869	GPC5	nonsynonymous SNV	GPC5:NM_004466:exon3:c.C464T:p.A155V	0.0901	0.013	23.7	4.19	.
1:161161284:G:C	rs41270041	1	161161284	G	C	C	0.08582	1.139	0.983144	1.31917	ADAMTS4	nonsynonymous SNV	ADAMTS4:NM_005099:exon9:c.C2158G:p.P720A	0.0742	0.001	0.016	0.261	ADAM-TS Spacer 1
14:70924566:C:G	rs3829452	14	70924566	C	G	C	0.08618	1.10254	0.985388	1.2321	ADAM21	nonsynonymous SNV	ADAM21:NM_003813:exon2:c.C350G:p.A117G	0.2045	0	0.001	2.86	Peptidase M12B, propeptide
19:9088772:T:C	rs17000950	19	9088772	T	C	C	0.08666	1.097	0.98819	1.21638	MUC16	nonsynonymous SNV	MUC16:NM_024690:exon1:c.A3043G:p.R1015G	0.1804	0.968	1.303	1.36	.
1:152281621:T:C	rs34806697	1	152281621	T	C	C	0.08674	1.182	0.978123	1.43064	FLG	nonsynonymous SNV	FLG:NM_002016:exon3:c.A5741G:p.Q1914R	0.0961	0.021	0.001	-6.9	.
3:142542449:G:T	rs17554211	3	142542449	G	T	T	0.087	1.119	0.984718	1.27049	PCOLCE2	nonsynonymous SNV	PCOLCE2:NM_013363:exon7:c.C874A:p.P292T	0.1014	0.007	22.8	5.41	.
19:9087758:G:A	rs12611293	19	9087758	G	A	A	0.08729	1.096	0.98819	1.21638	MUC16	nonsynonymous SNV	MUC16:NM_024690:exon1:c.C4057T:p.H1353Y	0.18	0.006	0.044	0.548	.
19:9088330:G:A	rs17000947	19	9088330	G	A	A	0.0873	1.096	0.98819	1.21638	MUC16	nonsynonymous SNV	MUC16:NM_024690:exon1:c.C3485T:p.T1162I	0.1802	0.039	0.696	-0.731	.
12:96131895:A:G	rs17288108	12	96131895	A	G	G	0.08872	1.095	0.986216	1.21395	NTN4	nonsynonymous SNV	NTN4:NM_001329700:exon3:c.T613C:p.Y205H,NTN4:NM_001329701:exon3:c.T502C:p.Y168H,NTN4:NM_001329702:exon3:c.T502C:p.Y168H,NTN4:NM_021229:exon3:c.T613C:p.Y205H	0.1768	0.001	8.038	1.57	Laminin, N-terminal
19:9057408:A:G	rs1423051	19	9057408	A	G	G	0.08896	1.143	0.977458	1.3375	MUC16	nonsynonymous SNV	MUC16:NM_024690:exon3:c.T30038C:p.L10013P	0.9042	0	1.413	-1.88	.
14:95080803:G:A	rs4934	14	95080803	G	A	G	0.08923	1.07296	0.988744	1.1657	SERPINA3	nonsynonymous SNV	SERPINA3:NM_001085:exon2:c.G25A:p.A9T	0.4908	0.121	8.933	-0.687	Serpin domain
19:9086123:A:C	rs10402812	19	9086123	A	C	A	0.0894	1.07991	0.988862	1.17963	MUC16	nonsynonymous SNV	MUC16:NM_024690:exon1:c.T5692G:p.Y1898D	0.3383	0.991	0.361	0.225	.
7:100635679:C:G	rs10953314	7	100635679	C	G	C	0.08948	1.0846	0.987005	1.19134	MUC12	nonsynonymous SNV	MUC12:NM_001164462:exon2:c.C1835G:p.T612S	0.5107	.	0.011	-1.39	.
7:100634964:C:A	rs4370452	7	100634964	C	A	C	0.08971	1.0846	0.987005	1.19134	MUC12	nonsynonymous SNV	MUC12:NM_001164462:exon2:c.C1120A:p.P374T	0.5091	.	8.54	.	.
17:33448818:T:C	rs1871892	17	33448818	T	C	T	0.08995	1.07875	0.987874	1.17845	FNDC8	nonsynonymous SNV	FNDC8:NM_017559:exon1:c.T106C:p.S36P	0.6829	0	6.266	3.61	.
10:81702210:G:C	rs17878336	10	81702210	G	C	G	0.09	1.21212	0.965258	1.52099	SFTPD	nonsynonymous SNV	SFTPD:NM_003019:exon4:c.C367G:p.L123V	0.0352	0.017	0.001	-6.72	.
1:152084693:TCTC:T	NA	1	152084693	TCTC	T	T	0.09032	1.277	0.968158	1.68263	TCHH	nonframeshift deletion	TCHH:NM_007113:exon3:c.997_999del:p.333_333del	0.0109	.	.	.	.
15:89398407:C:T	rs3743398	15	89398407	C	T	C	0.09047	1.10619	0.983537	1.24433	ACAN	nonsynonymous SNV	ACAN:NM_001135:exon12:c.C2591T:p.P864L,ACAN:NM_013227:exon12:c.C2591T:p.P864L	0.212	0.584	26.3	4.87	.
9:133963008:G:A	rs4740412	9	133963008	G	A	A	0.09154	1.093	0.98523	1.21274	LAMC3	nonsynonymous SNV	LAMC3:NM_006059:exon26:c.G4376A:p.R1459Q	0.2565	0	6.483	-4.34	.
3:52820981:A:T	rs678	3	52820981	A	T	T	0.09204	1.076	0.988783	1.17032	ITIH1	nonsynonymous SNV	ITIH1:NM_001166435:exon10:c.A890T:p.E297V,ITIH1:NM_001166436:exon10:c.A890T:p.E297V,ITIH1:NM_001166434:exon12:c.A1328T:p.E443V,ITIH1:NM_002215:exon14:c.A1754T:p.E585V	0.373	0.989	25.9	5.31	von Willebrand factor, type A
5:5303424:G:A	rs34586473	5	5303424	G	A	G	0.09205	1.321	0.944443	1.84626	ADAMTS16	nonsynonymous SNV	ADAMTS16:NM_139056:exon19:c.G2833A:p.G945R	0.0183	0.99	22.5	2.27	.
7:100637839:C:G	rs202092843	7	100637839	C	G	G	0.09205	1.142	0.980316	1.33093	MUC12	nonsynonymous SNV	MUC12:NM_001164462:exon2:c.C3995G:p.P1332R	0.045	.	0.044	0.722	.
7:100647553:G:A	rs112000879	7	100647553	G	A	G	0.09277	1.08225	0.986966	1.18663	MUC12	nonsynonymous SNV	MUC12:NM_001164462:exon2:c.G13709A:p.R4570H	0.4572	.	0.151	-0.747	.
8:108970367:A:G	rs601558	8	108970367	A	G	G	0.09342	1.075	0.987795	1.16915	RSPO2	nonsynonymous SNV	RSPO2:NM_001282863:exon4:c.T365C:p.L122P,RSPO2:NM_001317942:exon4:c.T356C:p.L119P,RSPO2:NM_178565:exon5:c.T557C:p.L186P	0.6087	0	19.76	4.95	Growth factor receptor cysteine-rich domain
19:9086318:G:A	rs4520945	19	9086318	G	A	A	0.09364	1.094	0.986216	1.21395	MUC16	nonsynonymous SNV	MUC16:NM_024690:exon1:c.C5497T:p.L1833F	0.1801	0.991	2.05	0.732	.
19:9085004:T:C	rs11085805	19	9085004	T	C	C	0.09365	1.094	0.986216	1.21395	MUC16	nonsynonymous SNV	MUC16:NM_024690:exon1:c.A6811G:p.T2271A	0.1806	0	0.002	-0.451	.
19:9085643:A:G	rs1574479	19	9085643	A	G	G	0.09365	1.094	0.986216	1.21395	MUC16	nonsynonymous SNV	MUC16:NM_024690:exon1:c.T6172C:p.S2058P	0.1802	0.782	1.711	0.731	.
19:9066259:T:C	rs17000770	19	9066259	T	C	T	0.09376	1.07527	0.988783	1.17032	MUC16	nonsynonymous SNV	MUC16:NM_024690:exon3:c.A21187G:p.T7063A	0.3811	0.673	0.033	-0.117	.
1:156622525:C:A	rs62001922	1	156622525	C	A	A	0.09397	1.289	0.966456	1.71965	BCAN	nonsynonymous SNV	BCAN:NM_021948:exon8:c.C1783A:p.L595I,BCAN:NM_198427:exon8:c.C1783A:p.L595I	0.0123	0.996	18.04	2.72	.
12:48368541:C:T	rs12721427	12	48368541	C	T	C	0.09398	1.14679	0.974647	1.34943	COL2A1	nonsynonymous SNV	COL2A1:NM_033150:exon51:c.G3784A:p.V1262I,COL2A1:NM_001844:exon52:c.G3991A:p.V1331I	0.0867	0.001	8.137	4.93	Fibrillar collagen, C-terminal
4:144621779:A:G	rs55935372	4	144621779	A	G	G	0.09429	1.079	0.987874	1.17845	FREM3	nonsynonymous SNV	FREM3:NM_001168235:exon1:c.T50C:p.V17A	0.3221	.	0.136	-4.27	.
19:9083457:C:T	rs17000886	19	9083457	C	T	T	0.09466	1.094	0.986216	1.21395	MUC16	nonsynonymous SNV	MUC16:NM_024690:exon1:c.G8358A:p.M2786I	0.1803	0.393	9.721	0.235	.
7:107569962:A:G	rs35915664	7	107569962	A	G	G	0.09483	1.263	0.966997	1.648	LAMB1	nonsynonymous SNV	LAMB1:NM_002291:exon30:c.T4640C:p.I1547T	0.0194	1	31	5.42	.
18:21402298:C:A	rs17187262	18	21402298	C	A	A	0.09528	1.289	0.964563	1.72302	LAMA3	nonsynonymous SNV	LAMA3:NM_001127717:exon20:c.C2387A:p.T796N,LAMA3:NM_198129:exon20:c.C2387A:p.T796N	0.0175	0.363	11.44	1.81	.
10:84744926:C:A	rs17101193	10	84744926	C	A	A	0.09541	1.144	0.978436	1.33884	NRG3	nonsynonymous SNV	NRG3:NM_001010848:exon9:c.C1656A:p.N552K,NRG3:NM_001165972:exon9:c.C1653A:p.N551K,NRG3:NM_001165973:exon11:c.C1065A:p.N355K	0.0596	0	12.02	2.74	Neuregulin, C-terminal
7:132193335:A:G	rs145024048	7	132193335	A	G	A	0.09663	1.42248	0.921161	2.19926	PLXNA4	nonsynonymous SNV	PLXNA4:NM_001105543:exon2:c.T118C:p.F40L,PLXNA4:NM_020911:exon2:c.T118C:p.F40L,PLXNA4:NM_181775:exon3:c.T118C:p.F40L	0.0121	0.007	2.736	3.02	Sema domain
7:100676409:C:T	rs34834039	7	100676409	C	T	T	0.09666	1.117	0.981808	1.27171	MUC17	nonsynonymous SNV	MUC17:NM_001040105:exon3:c.C1712T:p.P571L	0.1169	0.115	15.16	0.401	.
9:137593099:G:A	rs138579182	9	137593099	G	A	G	0.09666	1.29032	0.944934	1.76234	COL5A1	nonsynonymous SNV	COL5A1:NM_000093:exon4:c.G574A:p.D192N,COL5A1:NM_001278074:exon4:c.G574A:p.D192N	0.0302	0.031	17.88	3.2	Concanavalin A-like lectin/glucanase domain|Laminin G domain
7:37947103:C:T	rs1802074	7	37947103	C	T	T	0.09729	1.088	0.985151	1.20317	SFRP4	nonsynonymous SNV	SFRP4:NM_003014:exon6:c.G1019A:p.R340K	0.1988	0	2.55	0.881	.
3:195511336:G:C	rs201458132	3	195511336	G	C	G	0.09744	1.21359	0.96152	1.53302	MUC4	nonsynonymous SNV	MUC4:NM_018406:exon2:c.C7115G:p.T2372S	0.0525	0.002	0.027	.	.
20:34022196:C:T	rs224330	20	34022196	C	T	C	0.09769	1.18203	0.965721	1.44611	GDF5;GDF5OS	nonsynonymous SNV	GDF5OS:NM_001350519:exon2:c.C607T:p.L203F	0.056	.	.	.	.
4:88732692:G:A	rs1054627	4	88732692	G	A	A	0.09838	1.076	0.986847	1.17262	IBSP	nonsynonymous SNV	IBSP:NM_004967:exon7:c.G584A:p.G195E	0.3259	0.232	11.88	2.19	.
4:88732918:A:T	rs1054629	4	88732918	A	T	T	0.09876	1.076	0.987835	1.17379	IBSP	nonsynonymous SNV	IBSP:NM_004967:exon7:c.A810T:p.E270D	0.3264	0.189	22.9	0.073	.
12:9822387:C:G	rs16914640	12	9822387	C	G	C	0.0992	1.10497	0.98063	1.24553	CLEC2D	nonsynonymous SNV	CLEC2D:NM_001004419:exon1:c.C57G:p.N19K,CLEC2D:NM_001197317:exon1:c.C57G:p.N19K,CLEC2D:NM_001197318:exon1:c.C57G:p.N19K,CLEC2D:NM_001197319:exon1:c.C57G:p.N19K,CLEC2D:NM_013269:exon1:c.C57G:p.N19K	0.1498	0.276	17.97	-3.04	.
9:133948176:C:T	rs113259170	9	133948176	C	T	C	0.0995	1.41443	0.917447	2.18182	LAMC3	nonsynonymous SNV	LAMC3:NM_006059:exon19:c.C3371T:p.S1124F	0.0102	0.982	32	4.97	.
19:9069792:G:A	rs1862458	19	9069792	G	A	A	0.09967	1.092	0.984245	1.21153	MUC16	nonsynonymous SNV	MUC16:NM_024690:exon3:c.C17654T:p.S5885F	0.1802	0.995	5.103	1.87	.
7:100675512:G:A	rs10259584	7	100675512	G	A	A	0.09975	1.115	0.979846	1.26917	MUC17	nonsynonymous SNV	MUC17:NM_001040105:exon3:c.G815A:p.G272E	0.1192	0	0.028	0.429	.
4:79295378:G:A	rs114077522	4	79295378	G	A	G	0.09982	1.28535	0.943008	1.75186	FRAS1	nonsynonymous SNV	FRAS1:NM_001166133:exon25:c.G3124A:p.A1042T,FRAS1:NM_025074:exon25:c.G3124A:p.A1042T	0.0292	0.161	9.607	2.08	Growth factor receptor cysteine-rich domain
7:100680939:C:A	rs36120435	7	100680939	C	A	A	0.1005	1.115	0.979846	1.26917	MUC17	nonsynonymous SNV	MUC17:NM_001040105:exon3:c.C6242A:p.A2081D	0.1183	0.01	9.67	-1.18	.
11:1018374:T:A	rs7396383	11	1018374	T	A	A	0.101	1.096	0.982397	1.22355	MUC6	nonsynonymous SNV	MUC6:NM_005961:exon31:c.A4427T:p.N1476I	0.7136	0	6.263	0.334	.
21:19756040:C:G	rs2824790	21	19756040	C	G	C	0.101	1.07991	0.984994	1.18426	TMPRSS15	nonsynonymous SNV	TMPRSS15:NM_002772:exon4:c.G400C:p.E134Q	0.2831	0.906	22.8	1.98	SEA domain
1:67266756:T:A	rs549148	1	67266756	T	A	T	0.1013	1.11732	0.979885	1.2742	INSL5	nonsynonymous SNV	INSL5:NM_005478:exon1:c.A149T:p.Q50L	0.8746	0	0.003	-5.74	Insulin-like
19:17108136:G:A	rs61744196	19	17108136	G	A	G	0.1015	1.19617	0.962174	1.4867	CPAMD8	nonsynonymous SNV	CPAMD8:NM_015692:exon11:c.C1021T:p.R341W	0.0484	0.752	27.3	1.71	.
7:100647646:A:G	rs111352779	7	100647646	A	G	A	0.1018	1.07991	0.984994	1.18426	MUC12	nonsynonymous SNV	MUC12:NM_001164462:exon2:c.A13802G:p.E4601G	0.484	.	0.216	-1.7	.
7:100647676:C:T	rs113138639	7	100647676	C	T	C	0.1018	1.07991	0.984994	1.18426	MUC12	nonsynonymous SNV	MUC12:NM_001164462:exon2:c.C13832T:p.S4611L	0.4921	.	8.294	0.851	.
7:100647652:C:T	rs111660528	7	100647652	C	T	C	0.1023	1.07991	0.984994	1.18426	MUC12	nonsynonymous SNV	MUC12:NM_001164462:exon2:c.C13808T:p.T4603M	0.486	.	7.147	-0.418	.
1:151112483:T:C	rs75185260	1	151112483	T	C	T	0.1025	1.287	0.943046	1.75881	SEMA6C	nonsynonymous SNV	SEMA6C:NM_001178061:exon4:c.A202G:p.T68A,SEMA6C:NM_001178062:exon4:c.A202G:p.T68A,SEMA6C:NM_030913:exon4:c.A202G:p.T68A	0.0242	0.229	17.15	4.77	Sema domain|WD40/YVTN repeat-like-containing domain
7:100679136:T:C	rs7780935	7	100679136	T	C	C	0.1047	1.114	0.978867	1.2679	MUC17	nonsynonymous SNV	MUC17:NM_001040105:exon3:c.T4439C:p.V1480A	0.1155	0.01	0.003	-2.18	.
9:21228040:C:G	rs12552812	9	21228040	C	G	C	0.1048	1.09769	0.979532	1.22959	IFNA17	nonsynonymous SNV	IFNA17:NM_021268:exon1:c.G133C:p.G45R	0.178	0	0.001	-5.29	Four-helical cytokine, core|Four-helical cytokine-like, core
4:79295322:G:A	rs17459809	4	79295322	G	A	G	0.1049	1.27877	0.941991	1.73631	FRAS1	nonsynonymous SNV	FRAS1:NM_001166133:exon25:c.G3068A:p.G1023E,FRAS1:NM_025074:exon25:c.G3068A:p.G1023E	0.0291	0.001	0.001	-11.2	EGF-like domain|Growth factor receptor cysteine-rich domain;Growth factor receptor cysteine-rich domain
7:100648117:C:G	rs11766125	7	100648117	C	G	C	0.1053	1.07875	0.984009	1.18308	MUC12	nonsynonymous SNV	MUC12:NM_001164462:exon2:c.C14273G:p.T4758R	0.5077	.	4.316	-0.979	.
9:101767315:G:A	rs35934703	9	101767315	G	A	A	0.1053	1.126	0.976208	1.29963	COL15A1	nonsynonymous SNV	COL15A1:NM_001855:exon9:c.G1336A:p.G446R	0.0744	0.001	1.546	-0.633	.
6:30997824:T:C	rs12110785	6	30997824	T	C	C	0.1071	1.104	0.97965	1.24428	MUC22	nonsynonymous SNV	MUC22:NM_001198815:exon3:c.T4616C:p.L1539P,MUC22:NM_001318484:exon3:c.T4625C:p.L1542P,MUC22:NM_001322469:exon4:c.T4625C:p.L1542P	0.1437	.	0.079	-1.24	.
11:102713620:T:C	rs679620	11	102713620	T	C	T	0.1075	1.07181	0.984836	1.16565	MMP3	nonsynonymous SNV	MMP3:NM_002422:exon2:c.A133G:p.K45E	0.4975	0	0.001	-0.221	Metallopeptidase, catalytic domain|Peptidoglycan binding-like
9:95228663:C:T	rs41278695	9	95228663	C	T	C	0.1081	1.42248	0.905924	2.23178	ASPN	nonsynonymous SNV	ASPN:NM_001193335:exon5:c.G575A:p.G192E,ASPN:NM_017680:exon5:c.G575A:p.G192E	0.0108	0.887	31	5.72	Leucine-rich repeat domain, L domain-like
9:117835899:C:T	rs1138545	9	117835899	C	T	T	0.1081	1.096	0.981415	1.22233	TNC	nonsynonymous SNV	TNC:NM_002160:exon10:c.G3197A:p.R1066H	0.1701	0.025	17.19	3.05	Fibronectin type III|Immunoglobulin-like fold
7:76240785:CA:C	rs71819724	7	76240785	CA	C	C	0.1088	1.09	0.980356	1.21148	POMZP3	frameshift deletion	POMZP3:NM_012230:exon6:c.560delT:p.L187fs	0.5435	.	.	.	.
3:50332697:G:A	rs13100173	3	50332697	G	A	A	0.1091	1.09	0.980356	1.21148	HYAL3	nonsynonymous SNV	HYAL3:NM_001200029:exon2:c.C337T:p.H113Y,HYAL3:NM_001200030:exon2:c.C337T:p.H113Y,HYAL3:NM_003549:exon2:c.C337T:p.H113Y	0.4695	0.534	8.401	1.65	Aldolase-type TIM barrel|Glycoside hydrolase superfamily
5:127685135:C:T	rs154001	5	127685135	C	T	C	0.1091	1.07411	0.984876	1.17028	FBN2	nonsynonymous SNV	FBN2:NM_001999:exon23:c.G2893A:p.V965I	0.6936	0.118	22.3	3.32	EGF-like calcium-binding domain|EGF-like calcium-binding, conserved site|EGF-like domain|TB domain
20:39995111:T:G	rs192531993	20	39995111	T	G	G	0.1093	1.29	0.949557	1.75025	EMILIN3	nonsynonymous SNV	EMILIN3:NM_052846:exon1:c.A164C:p.H55P	0.0196	0.001	22.8	2.36	EMI domain
1:54605319:G:GC	rs36013100	1	54605319	G	GC	GC	0.1096	1.082	0.983104	1.19129	CDCP2	frameshift insertion	CDCP2:NM_201546:exon4:c.1223_1224insG:p.P408fs	0.7389	.	.	.	.
15:89450587:G:T	rs1878326	15	89450587	G	T	T	0.1098	1.073	0.983891	1.16911	MFGE8	nonsynonymous SNV	MFGE8:NM_001310319:exon2:c.C94A:p.L32M,MFGE8:NM_001114614:exon3:c.C226A:p.L76M,MFGE8:NM_005928:exon3:c.C226A:p.L76M,MFGE8:NM_001310320:exon4:c.C202A:p.L68M	0.6123	0.01	0.037	4.18	Coagulation factor 5/8 C-terminal domain|Galactose-binding domain-like
1:152283862:G:C	rs58001094	1	152283862	G	C	G	0.1104	1.10132	0.976715	1.24056	FLG	nonsynonymous SNV	FLG:NM_002016:exon3:c.C3500G:p.A1167G	0.1498	0.011	0.001	-5.53	.
1:152279642:G:C	rs149024902	1	152279642	G	C	G	0.1114	1.37174	0.916897	2.056	FLG	nonsynonymous SNV	FLG:NM_002016:exon3:c.C7720G:p.Q2574E	0.0241	0	0.001	-2.38	.
11:76507403:G:A	rs11236938	11	76507403	G	A	G	0.1116	1.23153	0.946826	1.60102	TSKU	nonsynonymous SNV	TSKU:NM_001258210:exon2:c.G743A:p.S248N,TSKU:NM_001318477:exon2:c.G785A:p.S262N,TSKU:NM_001318478:exon2:c.G743A:p.S248N,TSKU:NM_001318479:exon2:c.G743A:p.S248N,TSKU:NM_015516:exon2:c.G743A:p.S248N	0.0347	0.002	0.342	2.14	Leucine-rich repeat domain, L domain-like
3:195506258:G:T	rs11929196	3	195506258	G	T	T	0.1117	1.346	0.940184	1.92645	MUC4	nonsynonymous SNV	MUC4:NM_018406:exon2:c.C12193A:p.L4065I	0.0278	0.023	0.007	.	.
1:53532535:G:C	rs17107806	1	53532535	G	C	G	0.1123	1.24224	0.944216	1.6346	PODN	nonsynonymous SNV	PODN:NM_001199081:exon2:c.G28C:p.A10P,PODN:NM_001199080:exon3:c.G28C:p.A10P	0.0189	0.118	3.498	0.664	.
10:72500763:T:C	rs10823607	10	72500763	T	C	C	0.1124	1.104	0.975817	1.24917	ADAMTS14	nonsynonymous SNV	ADAMTS14:NM_080722:exon12:c.T1769C:p.L590P,ADAMTS14:NM_139155:exon12:c.T1778C:p.L593P	0.8723	0	9.485	-2.48	.
8:22059363:G:A	rs11996036	8	22059363	G	A	G	0.1128	1.15741	0.963445	1.39269	BMP1	nonsynonymous SNV	BMP1:NM_006129:exon16:c.G2155A:p.V719I	0.0649	0.006	13.95	3.11	EGF-like calcium-binding domain|EGF-like calcium-binding, conserved site|EGF-like domain|Growth factor receptor cysteine-rich domain
11:130058437:G:A	rs62621285	11	130058437	G	A	G	0.1145	1.20048	0.952867	1.51328	ST14	nonsynonymous SNV	ST14:NM_021978:exon3:c.G254A:p.R85H	0.0418	0.999	25.2	0.518	.
19:17108053:C:T	rs12974937	19	17108053	C	T	C	0.1151	1.10254	0.975778	1.24423	CPAMD8	nonsynonymous SNV	CPAMD8:NM_015692:exon11:c.G1104A:p.M368I	0.1703	0.012	0.088	-3.97	.
11:17632651:C:T	rs7111528	11	17632651	C	T	C	0.1152	1.08342	0.980238	1.19717	OTOG	nonsynonymous SNV	OTOG:NM_001277269:exon35:c.C5840T:p.T1947M,OTOG:NM_001292063:exon36:c.C5804T:p.T1935M	0.3618	0.011	6.652	-0.815	VWFC domain
6:31002527:A:G	rs4248153	6	31002527	A	G	G	0.1155	1.075	0.982986	1.17723	MUC22	nonsynonymous SNV	MUC22:NM_001198815:exon5:c.A5134G:p.N1712D,MUC22:NM_001318484:exon5:c.A5143G:p.N1715D,MUC22:NM_001322469:exon6:c.A5143G:p.N1715D	0.4216	.	0.394	0.841	Mucin, catalytic, TM and cytoplasmic tail domain
3:130107975:A:G	rs16827168	3	130107975	A	G	G	0.1157	1.211	0.95864	1.52843	COL6A5	nonsynonymous SNV	COL6A5:NM_001278298:exon6:c.A2414G:p.H805R,COL6A5:NM_153264:exon6:c.A2414G:p.H805R	0.0267	0.007	6.641	3.99	von Willebrand factor, type A
7:84727240:A:G	rs147821428	7	84727240	A	G	A	0.1158	1.27877	0.931872	1.75165	SEMA3D	nonsynonymous SNV	SEMA3D:NM_152754:exon2:c.T193C:p.S65P	0.0201	0.357	16.46	-1.21	Sema domain|WD40/YVTN repeat-like-containing domain
7:100677405:G:A	rs141963257	7	100677405	G	A	A	0.1158	1.143	0.968855	1.34668	MUC17	nonsynonymous SNV	MUC17:NM_001040105:exon3:c.G2708A:p.R903H	0.0584	0	0.163	-1.16	.
1:153509890:T:C	rs3795393	1	153509890	T	C	T	0.1167	1.13895	0.965953	1.34264	S100A5	nonsynonymous SNV	S100A5:NM_002962:exon4:c.A161G:p.D54G	0.07	0.043	19.42	3.27	EF-hand domain|EF-hand domain pair
19:9062544:T:G	rs2547063	19	9062544	T	G	G	0.1168	1.116	0.971261	1.28295	MUC16	nonsynonymous SNV	MUC16:NM_024690:exon3:c.A24902C:p.N8301T	0.8814	0	0.089	0.406	.
20:23860178:A:G	rs1799841	20	23860178	A	G	A	0.1169	1.06838	0.983812	1.15988	CST5	nonsynonymous SNV	CST5:NM_001900:exon1:c.T136C:p.C46R	0.439	0	0.001	-0.399	Cystatin domain
1:152280782:A:G	rs2184953	1	152280782	A	G	A	0.1172	1.0989	0.976676	1.23565	FLG	nonsynonymous SNV	FLG:NM_002016:exon3:c.T6580C:p.Y2194H	0.152	0.003	0.006	-5.98	.
11:1269707:C:T	rs187569173	11	1269707	C	T	C	0.1188	1.23916	0.943235	1.62652	MUC5B	nonsynonymous SNV	MUC5B:NM_002458:exon31:c.C11597T:p.P3866L	0.0558	0	8.171	0.118	.
10:20506418:G:A	rs3817405	10	20506418	G	A	A	0.1189	1.073	0.981965	1.1714	PLXDC2	nonsynonymous SNV	PLXDC2:NM_001282736:exon10:c.G1039A:p.V347I,PLXDC2:NM_032812:exon11:c.G1186A:p.V396I	0.6641	0.003	0.005	-11.1	.
1:175092674:C:T	rs2285215	1	175092674	C	T	T	0.119	1.071	0.981925	1.16677	TNN	nonsynonymous SNV	TNN:NM_022093:exon12:c.C2789T:p.P930L	0.6451	0.973	11.63	3.1	Fibronectin type III|Immunoglobulin-like fold
3:52821011:A:G	rs1042779	3	52821011	A	G	G	0.1192	1.069	0.982868	1.16332	ITIH1	nonsynonymous SNV	ITIH1:NM_001166435:exon10:c.A920G:p.Q307R,ITIH1:NM_001166436:exon10:c.A920G:p.Q307R,ITIH1:NM_001166434:exon12:c.A1358G:p.Q453R,ITIH1:NM_002215:exon14:c.A1784G:p.Q595R	0.3812	0.008	0.151	2.96	von Willebrand factor, type A
1:31349983:C:T	rs41269523	1	31349983	C	T	T	0.1193	1.301	0.943235	1.79399	SDC3	nonsynonymous SNV	SDC3:NM_014654:exon3:c.G286A:p.A96T	0.0167	0.762	28.7	4.93	.
16:69988319:T:C	rs3869427	16	69988319	T	C	T	0.1196	1.08225	0.979258	1.19597	CLEC18A	nonsynonymous SNV	CLEC18A:NM_001136214:exon4:c.T299C:p.L100P,CLEC18A:NM_001271197:exon4:c.T299C:p.L100P,CLEC18A:NM_182619:exon4:c.T299C:p.L100P	0.372	0	0.003	-0.22	CAP domain
11:17631751:C:T	rs2041028	11	17631751	C	T	C	0.1199	1.08225	0.979258	1.19597	OTOG	nonsynonymous SNV	OTOG:NM_001277269:exon35:c.C4940T:p.P1647L,OTOG:NM_001292063:exon36:c.C4904T:p.P1635L	0.3606	0	6.13	4.13	von Willebrand factor, type D domain
5:79361265:G:C	rs1866389	5	79361265	G	C	C	0.1208	1.079	0.980159	1.18773	THBS4	nonsynonymous SNV	THBS4:NM_001306214:exon9:c.G886C:p.A296P,THBS4:NM_003248:exon9:c.G1159C:p.A387P,THBS4:NM_001306212:exon10:c.G886C:p.A296P,THBS4:NM_001306213:exon10:c.G886C:p.A296P	0.2164	0.568	24.9	5.19	EGF-like calcium-binding domain|EGF-like calcium-binding, conserved site|EGF-like domain
6:30997352:A:G	NA	6	30997352	A	G	G	0.121	1.101	0.974803	1.24299	MUC22	nonsynonymous SNV	MUC22:NM_001198815:exon3:c.A4144G:p.S1382G,MUC22:NM_001318484:exon3:c.A4153G:p.S1385G,MUC22:NM_001322469:exon3:c.A4153G:p.S1385G	0.1542	.	0.002	-7.48	.
2:152220510:A:G	rs75961064	2	152220510	A	G	G	0.1211	1.289	0.94399	1.76057	TNFAIP6	nonsynonymous SNV	TNFAIP6:NM_007115:exon2:c.A148G:p.T50A	0.0124	0.997	25.7	5.85	C-type lectin fold|C-type lectin-like|Link domain
15:89400043:G:C	rs28559926	15	89400043	G	C	C	0.1215	1.197	0.95749	1.49697	ACAN	nonsynonymous SNV	ACAN:NM_001135:exon12:c.G4227C:p.E1409D,ACAN:NM_013227:exon12:c.G4227C:p.E1409D	0.0115	0.002	0.048	-4.2	.
1:152279841:G:C	rs3126074	1	152279841	G	C	G	0.1234	1.09769	0.97379	1.23684	FLG	nonsynonymous SNV	FLG:NM_002016:exon3:c.C7521G:p.H2507Q	0.1493	0	0.001	-4.87	.
6:32029431:G:A	rs12524664	6	32029431	G	A	A	0.1237	1.141	0.965992	1.34797	TNXB	nonsynonymous SNV	TNXB:NM_019105:exon21:c.C7235T:p.P2412L	0.0614	0.999	29.5	4	Fibronectin type III
3:151161112:A:G	rs12487205	3	151161112	A	G	A	0.1238	1.1919	0.948987	1.49535	IGSF10	nonsynonymous SNV	IGSF10:NM_178822:exon5:c.T5623C:p.Y1875H	0.0334	0.001	2.942	3.24	Immunoglobulin I-set|Immunoglobulin subtype 2|Immunoglobulin-like domain|Immunoglobulin-like fold
16:84879464:A:G	rs12051468	16	84879464	A	G	A	0.1247	1.06724	0.982829	1.15872	CRISPLD2	nonsynonymous SNV	CRISPLD2:NM_031476:exon3:c.A313G:p.S105G	0.4448	0	0.002	-5.79	CAP domain
6:32024395:C:T	rs10947230	6	32024395	C	T	T	0.1248	1.141	0.965026	1.34662	TNXB	nonsynonymous SNV	TNXB:NM_019105:exon23:c.G8111A:p.R2704H	0.0613	1	26.7	4.61	Fibronectin type III|Immunoglobulin-like fold
11:20805286:G:A	rs8176785	11	20805286	G	A	G	0.1249	1.07643	0.979141	1.18185	NELL1	nonsynonymous SNV	NELL1:NM_001288714:exon3:c.G245A:p.R82Q,NELL1:NM_006157:exon3:c.G245A:p.R82Q,NELL1:NM_201551:exon3:c.G245A:p.R82Q,NELL1:NM_001288713:exon4:c.G329A:p.R110Q	0.7502	0.007	23	3.07	Concanavalin A-like lectin/glucanase domain|Laminin G domain
6:74497009:A:G	rs2351528	6	74497009	A	G	G	0.1254	1.069	0.982868	1.16332	CD109	nonsynonymous SNV	CD109:NM_001159588:exon20:c.A2159G:p.N720S,CD109:NM_001159587:exon21:c.A2390G:p.N797S,CD109:NM_133493:exon21:c.A2390G:p.N797S	0.3338	0.008	0.004	1.63	Alpha-2-macroglobulin
6:74497152:G:A	rs5023688	6	74497152	G	A	A	0.1254	1.07	0.980944	1.1656	CD109	nonsynonymous SNV	CD109:NM_001159588:exon20:c.G2302A:p.V768I,CD109:NM_001159587:exon21:c.G2533A:p.V845I,CD109:NM_133493:exon21:c.G2533A:p.V845I	0.3333	0.002	0.001	-9.1	Alpha-2-macroglobulin|Immunoglobulin E-set
17:48916935:G:A	rs35300894	17	48916935	G	A	G	0.1254	1.2285	0.938455	1.60564	WFIKKN2	nonsynonymous SNV	WFIKKN2:NM_001330341:exon2:c.G7A:p.V3M,WFIKKN2:NM_175575:exon2:c.G286A:p.V96M	0.0277	0.996	23.1	5.53	.
3:151166058:G:A	rs17204557	3	151166058	G	A	G	0.1257	1.19048	0.947129	1.49828	IGSF10	nonsynonymous SNV	IGSF10:NM_178822:exon4:c.C1711T:p.P571S	0.0331	0.006	0.008	-1.13	Immunoglobulin-like domain
1:152281479:G:T	rs3126079	1	152281479	G	T	G	0.1264	1.09529	0.973751	1.23195	FLG	nonsynonymous SNV	FLG:NM_002016:exon3:c.C5883A:p.H1961Q	0.1512	0	0.001	-4.75	.
20:34022387:A:C	rs224331	20	34022387	A	C	A	0.1269	1.07181	0.979062	1.17253	GDF5;GDF5OS	nonsynonymous SNV	GDF5:NM_000557:exon2:c.T826G:p.S276A,GDF5:NM_001319138:exon4:c.T826G:p.S276A	0.3626	.	.	.	.
3:195510767:G:A	rs200958281	3	195510767	G	A	G	0.1271	1.22699	0.940297	1.60249	MUC4	nonsynonymous SNV	MUC4:NM_018406:exon2:c.C7684T:p.P2562S	0.0107	0.001	13.08	-2.09	.
11:17593709:T:C	rs7106548	11	17593709	T	C	T	0.1272	1.07066	0.980983	1.17023	OTOG	nonsynonymous SNV	OTOG:NM_001277269:exon17:c.T2074C:p.S692P,OTOG:NM_001292063:exon18:c.T2038C:p.S680P	0.4279	.	3.006	-4.21	von Willebrand factor, type D domain
3:129324608:C:G	rs79870266	3	129324608	C	G	G	0.1274	1.218	0.949405	1.56193	PLXND1	nonsynonymous SNV	PLXND1:NM_015103:exon1:c.G875C:p.G292A	0.0318	0	0.002	-2.6	Sema domain|WD40/YVTN repeat-like-containing domain
3:52833805:C:A	rs3617	3	52833805	C	A	A	0.1279	1.065	0.980865	1.15641	ITIH3	nonsynonymous SNV	ITIH3:NM_002217:exon9:c.C943A:p.Q315K	0.4608	0	0.158	4.15	von Willebrand factor, type A
4:167020644:A:G	rs2291822	4	167020644	A	G	A	0.1279	1.16959	0.952372	1.43735	TLL1	nonsynonymous SNV	TLL1:NM_012464:exon20:c.A2872G:p.T958A	0.0512	0	0.022	-2.99	CUB domain
12:9303296:A:T	rs10842971	12	9303296	A	T	T	0.1284	1.071	0.980003	1.16906	PZP	nonsynonymous SNV	PZP:NM_002864:exon34:c.T4328A:p.I1443N	0.3325	0.899	24.6	4.18	Alpha-macroglobulin, receptor-binding
19:9057687:A:G	rs1895364	19	9057687	A	G	G	0.1287	1.111	0.968313	1.27405	MUC16	nonsynonymous SNV	MUC16:NM_024690:exon3:c.T29759C:p.I9920T	0.8793	0	2.642	0.023	.
5:177683905:G:A	rs61739424	5	177683905	G	A	A	0.1288	1.209	0.950203	1.53892	COL23A1	nonsynonymous SNV	COL23A1:NM_173465:exon14:c.C799T:p.R267W	0.0449	1	23.1	2.78	.
1:31347399:C:T	rs4949184	1	31347399	C	T	C	0.1291	1.10375	0.971999	1.25408	SDC3	nonsynonymous SNV	SDC3:NM_014654:exon4:c.G907A:p.D303N	0.2039	0.008	22.4	4.7	.
3:195511690:G:C	rs199920095	3	195511690	G	C	G	0.1297	1.20048	0.945426	1.52519	MUC4	nonsynonymous SNV	MUC4:NM_018406:exon2:c.C6761G:p.T2254S	0.0191	0.784	0.011	.	.
1:152286002:T:C	rs2011331	1	152286002	T	C	T	0.1299	1.09649	0.972816	1.2356	FLG	nonsynonymous SNV	FLG:NM_002016:exon3:c.A1360G:p.T454A	0.1493	0.04	1.414	-6.86	.
1:152279920:A:G	rs55650366	1	152279920	A	G	A	0.1305	1.09529	0.971844	1.23437	FLG	nonsynonymous SNV	FLG:NM_002016:exon3:c.T7442C:p.L2481S	0.1486	0	0.001	-1.66	.
1:152280032:T:C	rs71625200	1	152280032	T	C	T	0.1306	1.09529	0.971844	1.23437	FLG	nonsynonymous SNV	FLG:NM_002016:exon3:c.A7330G:p.K2444E	0.1484	0	0.006	2.1	.
5:38425110:C:A	rs6897179	5	38425110	C	A	C	0.1306	1.25628	0.927002	1.70199	EGFLAM	nonsynonymous SNV	EGFLAM:NM_182798:exon8:c.C1024A:p.H342N,EGFLAM:NM_001205301:exon13:c.C1726A:p.H576N,EGFLAM:NM_152403:exon13:c.C1726A:p.H576N	0.0231	0	11.67	3.44	EGF-like domain
13:111121620:C:T	rs9583500	13	111121620	C	T	C	0.1308	1.08225	0.977341	1.19832	COL4A2	nonsynonymous SNV	COL4A2:NM_001846:exon28:c.C2152T:p.P718S	0.1944	0.21	8.811	5.57	.
1:152283236:T:C	rs11581433	1	152283236	T	C	T	0.1315	1.09529	0.972816	1.2356	FLG	nonsynonymous SNV	FLG:NM_002016:exon3:c.A4126G:p.R1376G	0.1479	0	0.002	-4.46	.
10:102744331:A:T	rs11591349	10	102744331	A	T	T	0.1316	1.065	0.980865	1.15641	SEMA4G	nonsynonymous SNV	SEMA4G:NM_001203244:exon14:c.A1790T:p.D597V	0.455	0.451	14.66	2.53	Immunoglobulin subtype|Immunoglobulin-like domain|Immunoglobulin-like fold
19:9069892:A:C	rs1862460	19	9069892	A	C	C	0.1325	1.084	0.976403	1.20187	MUC16	nonsynonymous SNV	MUC16:NM_024690:exon3:c.T17554G:p.F5852V	0.1812	0	0.048	-0.715	.
9:113169631:G:A	rs7030192	9	113169631	G	A	G	0.1327	1.07066	0.980003	1.16906	SVEP1	nonsynonymous SNV	SVEP1:NM_153366:exon38:c.C8249T:p.A2750V	0.3303	0	0.003	4.71	Sushi/SCR/CCP domain
15:84611367:G:C	rs34047645	15	84611367	G	C	C	0.1327	1.087	0.975505	1.21022	ADAMTSL3	nonsynonymous SNV	ADAMTSL3:NM_001301110:exon18:c.G2137C:p.G713R,ADAMTSL3:NM_207517:exon18:c.G2137C:p.G713R	0.184	0.002	14.58	3.61	.
1:152285930:G:A	rs11584340	1	152285930	G	A	G	0.1331	1.09649	0.972816	1.2356	FLG	nonsynonymous SNV	FLG:NM_002016:exon3:c.C1432T:p.P478S	0.148	0.02	0.001	-3.12	.
1:152286367:C:A	rs41267154	1	152286367	C	A	C	0.1335	1.09529	0.972816	1.2356	FLG	nonsynonymous SNV	FLG:NM_002016:exon3:c.G995T:p.G332V	0.1479	1	15.37	1.2	.
7:84628989:T:G	rs7800072	7	84628989	T	G	G	0.1335	1.069	0.980944	1.1656	SEMA3D	nonsynonymous SNV	SEMA3D:NM_152754:exon17:c.A2101C:p.K701Q	0.3115	0	10.15	3.82	.
17:1657653:G:A	rs1057335	17	1657653	G	A	G	0.1335	1.0846	0.973556	1.2078	SERPINF2	nonsynonymous SNV	SERPINF2:NM_001165921:exon9:c.G1109A:p.R370K,SERPINF2:NM_000934:exon10:c.G1301A:p.R434K,SERPINF2:NM_001165920:exon10:c.G1301A:p.R434K	0.1892	0.001	7.836	0.742	Serpin domain
1:152280170:C:G	rs71625201	1	152280170	C	G	C	0.1339	1.09529	0.972816	1.2356	FLG	nonsynonymous SNV	FLG:NM_002016:exon3:c.G7192C:p.E2398Q	0.1385	0.041	0.017	-3.46	.
3:195510943:G:T	rs201313220	3	195510943	G	T	G	0.1348	1.18765	0.944292	1.4938	MUC4	nonsynonymous SNV	MUC4:NM_018406:exon2:c.C7508A:p.S2503Y	0.0726	.	11.46	.	.
7:76240888:A:G	rs1134609	7	76240888	A	G	G	0.135	1.082	0.975427	1.20067	POMZP3	nonsynonymous SNV	POMZP3:NM_012230:exon6:c.T458C:p.L153P	0.5466	0	7.412	0.786	.
7:100675376:A:C	rs10229731	7	100675376	A	C	C	0.1351	1.102	0.971961	1.24912	MUC17	nonsynonymous SNV	MUC17:NM_001040105:exon3:c.A679C:p.K227Q	0.1276	0.014	0.004	-0.628	.
1:152279729:C:T	rs3126072	1	152279729	C	T	C	0.1352	1.0929	0.971805	1.22949	FLG	nonsynonymous SNV	FLG:NM_002016:exon3:c.G7633A:p.G2545R	0.1492	0	1.027	0.755	.
3:195512455:G:T	rs202241172	3	195512455	G	T	T	0.1366	1.255	0.93703	1.68041	MUC4	nonsynonymous SNV	MUC4:NM_018406:exon2:c.C5996A:p.T1999N	0.0114	0.077	0.066	.	.
3:48628014:G:A	rs2228561	3	48628014	G	A	G	0.1369	1.09529	0.969941	1.23679	COL7A1	nonsynonymous SNV	COL7A1:NM_000094:exon14:c.C1784T:p.P595L	0.1423	0	4.185	-2.98	Fibronectin type III
3:195508700:C:T	rs201890853	3	195508700	C	T	T	0.1369	1.264	0.93441	1.70888	MUC4	nonsynonymous SNV	MUC4:NM_018406:exon2:c.G9751A:p.V3251I	0.0101	0.978	13.48	1.03	.
5:178540975:G:A	rs1054480	5	178540975	G	A	G	0.1376	1.07066	0.978084	1.17135	ADAMTS2	nonsynonymous SNV	ADAMTS2:NM_014244:exon22:c.C3529T:p.P1177S	0.2921	0.651	6.685	5.05	.
4:88767008:G:A	rs17013285	4	88767008	G	A	G	0.1381	1.08578	0.972622	1.21138	MEPE	nonsynonymous SNV	MEPE:NM_001184694:exon4:c.G988A:p.V330I,MEPE:NM_001291183:exon4:c.G1081A:p.V361I,MEPE:NM_020203:exon4:c.G988A:p.V330I,MEPE:NM_001184695:exon5:c.G649A:p.V217I,MEPE:NM_001184696:exon5:c.G649A:p.V217I,MEPE:NM_001184697:exon6:c.G649A:p.V217I	0.1852	0.014	1.506	0.436	.
10:116050008:A:G	rs11196686	10	116050008	A	G	A	0.1396	1.15875	0.950317	1.41193	VWA2	nonsynonymous SNV	VWA2:NM_001272046:exon13:c.A2132G:p.Q711R,VWA2:NM_001320804:exon13:c.A2132G:p.Q711R	0.0756	0	22.2	1.68	von Willebrand factor, type A
1:115829313:G:A	rs6330	1	115829313	G	A	A	0.1398	1.064	0.979885	1.15525	NGF	nonsynonymous SNV	NGF:NM_002506:exon3:c.C104T:p.A35V	0.4621	0.002	19.04	4.45	.
7:100678421:T:A	rs10265276	7	100678421	T	A	A	0.1399	1.102	0.970057	1.25157	MUC17	nonsynonymous SNV	MUC17:NM_001040105:exon3:c.T3724A:p.S1242T	0.1314	0	0.05	-1.68	.
19:9059808:A:G	rs7508222	19	9059808	A	G	G	0.1399	1.109	0.964486	1.274	MUC16	nonsynonymous SNV	MUC16:NM_024690:exon3:c.T27638C:p.I9213T	0.8811	0	0.069	-0.027	.
1:152285099:C:T	rs74129461	1	152285099	C	T	C	0.14	1.09409	0.970873	1.23314	FLG	nonsynonymous SNV	FLG:NM_002016:exon3:c.G2263A:p.E755K	0.1478	0.808	22.6	1.02	.
6:30994052:A:T	rs72847018	6	30994052	A	T	A	0.14	1.23609	0.925779	1.64727	MUC22	nonsynonymous SNV	MUC22:NM_001198815:exon3:c.A844T:p.I282F,MUC22:NM_001318484:exon3:c.A853T:p.I285F,MUC22:NM_001322469:exon3:c.A853T:p.I285F	0.0231	.	0.004	-5.58	.
6:129687396:G:A	rs117781224	6	129687396	G	A	G	0.1403	1.19904	0.937105	1.53566	LAMA2	nonsynonymous SNV	LAMA2:NM_000426:exon33:c.G4750A:p.G1584S,LAMA2:NM_001079823:exon33:c.G4750A:p.G1584S	0.0282	0.039	21.1	3.49	.
7:100678433:A:T	rs4729651	7	100678433	A	T	T	0.1406	1.128	0.961982	1.32149	MUC17	nonsynonymous SNV	MUC17:NM_001040105:exon3:c.A3736T:p.T1246S	0.1091	0.007	0.001	-1.68	.
7:100678434:C:A	rs4729652	7	100678434	C	A	A	0.1406	1.128	0.961982	1.32149	MUC17	nonsynonymous SNV	MUC17:NM_001040105:exon3:c.C3737A:p.T1246N	0.1086	0.649	0.001	-1.68	.
11:65319751:G:A	rs11545200	11	65319751	G	A	G	0.1411	1.15075	0.951115	1.39114	LTBP3	nonsynonymous SNV	LTBP3:NM_001130144:exon7:c.C1313T:p.A438V,LTBP3:NM_001164266:exon7:c.C962T:p.A321V,LTBP3:NM_021070:exon7:c.C1313T:p.A438V	0.0606	0.992	26	3.99	TB domain
1:152277055:C:G	rs2065955	1	152277055	C	G	C	0.1416	1.0989	0.967152	1.24782	FLG	nonsynonymous SNV	FLG:NM_002016:exon3:c.G10307C:p.G3436A	0.1282	0.876	8.403	-1.14	.
7:100680983:G:A	rs28593004	7	100680983	G	A	A	0.142	1.101	0.969088	1.25032	MUC17	nonsynonymous SNV	MUC17:NM_001040105:exon3:c.G6286A:p.A2096T	0.1222	0.001	1.578	-0.9	.
9:78853916:G:C	rs17062264	9	78853916	G	C	C	0.1425	1.099	0.969049	1.24538	PCSK5	nonsynonymous SNV	PCSK5:NM_001190482:exon23:c.G2908C:p.G970R	0.12	.	6.945	4.53	Growth factor receptor cysteine-rich domain
10:81927059:C:T	rs2229554	10	81927059	C	T	T	0.1426	1.124	0.962867	1.31238	ANXA11	nonsynonymous SNV	ANXA11:NM_001157:exon5:c.G572A:p.R191Q,ANXA11:NM_145868:exon6:c.G572A:p.R191Q,ANXA11:NM_001278407:exon7:c.G572A:p.R191Q,ANXA11:NM_001278408:exon7:c.G572A:p.R191Q,ANXA11:NM_001278409:exon7:c.G473A:p.R158Q,ANXA11:NM_145869:exon7:c.G572A:p.R191Q	0.0638	0.999	27.6	5.31	.
19:9072742:T:C	rs2591590	19	9072742	T	C	C	0.1426	1.068	0.978045	1.16672	MUC16	nonsynonymous SNV	MUC16:NM_024690:exon3:c.A14704G:p.I4902V	0.2683	0.078	5.888	2.18	.
19:9072313:A:G	rs2121133	19	9072313	A	G	G	0.1427	1.068	0.978045	1.16672	MUC16	nonsynonymous SNV	MUC16:NM_024690:exon3:c.T15133C:p.S5045P	0.269	0.002	2.806	-3.18	.
6:52101739:T:C	rs763780	6	52101739	T	C	C	0.143	1.151	0.955806	1.38708	IL17F	nonsynonymous SNV	IL17F:NM_052872:exon3:c.A482G:p.H161R	0.0497	0.048	0.057	2.78	Cystine-knot cytokine
6:2955802:T:C	rs2295769	6	2955802	T	C	T	0.1431	1.09649	0.96998	1.2417	SERPINB6	nonsynonymous SNV	SERPINB6:NM_001271822:exon3:c.A310G:p.M104V,SERPINB6:NM_001271823:exon3:c.A325G:p.M109V,SERPINB6:NM_001271824:exon3:c.A268G:p.M90V,SERPINB6:NM_001271825:exon3:c.A268G:p.M90V,SERPINB6:NM_001297699:exon3:c.A268G:p.M90V,SERPINB6:NM_001297700:exon3:c.A268G:p.M90V,SERPINB6:NM_004568:exon3:c.A268G:p.M90V,SERPINB6:NM_001195291:exon4:c.A280G:p.M94V	0.2988	0	0.066	3.8	Serpin domain
21:47423509:C:T	rs13051496	21	47423509	C	T	C	0.1434	1.11732	0.962751	1.29688	COL6A1	nonsynonymous SNV	COL6A1:NM_001848:exon35:c.C2669T:p.S890L	0.2143	0.126	16.81	4.03	von Willebrand factor, type A
3:167184878:T:C	rs9841174	3	167184878	T	C	T	0.1436	1.0661	0.978005	1.16211	SERPINI2	nonsynonymous SNV	SERPINI2:NM_006217:exon3:c.A443G:p.E148G,SERPINI2:NM_001012303:exon4:c.A473G:p.E158G	0.3773	0.722	22.6	3.34	Serpin domain
1:152276772:C:A	rs72697000	1	152276772	C	A	C	0.1442	1.0989	0.967152	1.24782	FLG	nonsynonymous SNV	FLG:NM_002016:exon3:c.G10590T:p.R3530S	0.1238	0.998	1.143	-2.97	.
7:100678370:C:T	rs79819548	7	100678370	C	T	C	0.1443	1.28041	0.912032	1.79693	MUC17	nonsynonymous SNV	MUC17:NM_001040105:exon3:c.C3673T:p.P1225S	0.0562	0.003	0.006	-1.46	.
7:100678740:T:C	rs4269454	7	100678740	T	C	C	0.1445	1.101	0.969088	1.25032	MUC17	nonsynonymous SNV	MUC17:NM_001040105:exon3:c.T4043C:p.L1348P	0.1229	0	0.003	-1.72	.
1:183191324:C:A	rs2296306	1	183191324	C	A	A	0.1447	1.173	0.949633	1.45017	LAMC2	nonsynonymous SNV	LAMC2:NM_005562:exon6:c.C741A:p.D247E,LAMC2:NM_018891:exon6:c.C741A:p.D247E	0.0341	0.282	12.5	1.82	Laminin IV
19:17111297:A:G	rs4808551	19	17111297	A	G	A	0.1448	1.09051	0.971766	1.22463	CPAMD8	nonsynonymous SNV	CPAMD8:NM_015692:exon10:c.T935C:p.M312T	0.829	0	0.001	-2	.
7:100635535:C:T	rs35240454	7	100635535	C	T	T	0.1452	1.124	0.960982	1.31495	MUC12	nonsynonymous SNV	MUC12:NM_001164462:exon2:c.C1691T:p.S564F	0.1363	.	5.192	0.695	.
11:73978243:G:A	rs3741132	11	73978243	G	A	A	0.1452	1.088	0.971727	1.21979	P4HA3	stopgain	P4HA3:NM_001288748:exon13:c.C1678T:p.Q560X	0.1886	.	13.46	0.713	.
3:195515449:A:G	rs200672669	3	195515449	A	G	G	0.1455	1.238	0.933103	1.64089	MUC4	nonsynonymous SNV	MUC4:NM_018406:exon2:c.T3002C:p.V1001A	0.0392	0.001	0.011	-2.48	.
9:117554791:C:T	rs55737197	9	117554791	C	T	C	0.1464	1.21212	0.929973	1.5787	TNFSF15	nonsynonymous SNV	TNFSF15:NM_001204344:exon1:c.G20A:p.R7H	0.0316	.	.	.	.
9:133901752:C:T	rs45628035	9	133901752	C	T	T	0.1468	1.255	0.929712	1.69364	LAMC3	nonsynonymous SNV	LAMC3:NM_006059:exon2:c.C454T:p.R152C	0.0152	0.402	24.5	2.79	Galactose-binding domain-like|Laminin, N-terminal
4:88732911:C:T	rs1054628	4	88732911	C	T	C	0.1469	1.08696	0.970756	1.21857	IBSP	nonsynonymous SNV	IBSP:NM_004967:exon7:c.C803T:p.A268V	0.1471	0.017	23.4	3.47	.
6:54254589:A:C	rs3736352	6	54254589	A	C	A	0.1469	1.18624	0.93688	1.4996	TINAG	nonsynonymous SNV	TINAG:NM_014464:exon11:c.A1297C:p.I433L	0.0376	0.489	3.92	0.524	Peptidase C1A, papain C-terminal
9:101748234:G:A	rs2075662	9	101748234	G	A	A	0.1472	1.084	0.973556	1.2078	COL15A1	nonsynonymous SNV	COL15A1:NM_001855:exon3:c.G488A:p.R163H	0.1437	0.011	15.92	1.22	Concanavalin A-like lectin/glucanase domain|Laminin G domain
7:100681172:A:G	rs28555173	7	100681172	A	G	G	0.1474	1.1	0.968119	1.24907	MUC17	nonsynonymous SNV	MUC17:NM_001040105:exon3:c.A6475G:p.R2159G	0.1226	0.061	0.007	-1.58	.
1:161168189:C:T	rs34448954	1	161168189	C	T	T	0.1476	1.102	0.966262	1.25649	ADAMTS4	nonsynonymous SNV	ADAMTS4:NM_001320336:exon1:c.G229A:p.A77T,ADAMTS4:NM_005099:exon1:c.G229A:p.A77T	0.1049	0.004	5.786	-6.94	.
12:6172202:T:C	rs1800378	12	6172202	T	C	C	0.1476	1.067	0.977067	1.16556	VWF	nonsynonymous SNV	VWF:NM_000552:exon13:c.A1451G:p.H484R	0.6403	0.017	0.003	1.25	von Willebrand factor, type D domain
6:159621087:C:T	rs62432291	6	159621087	C	T	T	0.1477	1.138	0.957452	1.35186	FNDC1	nonsynonymous SNV	FNDC1:NM_032532:exon3:c.C364T:p.P122S	0.0607	1	24.2	5.95	Fibronectin type III|Immunoglobulin-like fold
7:100636147:C:T	rs34196598	7	100636147	C	T	T	0.1481	1.121	0.960943	1.30975	MUC12	nonsynonymous SNV	MUC12:NM_001164462:exon2:c.C2303T:p.T768I	0.1355	.	2.835	0.481	.
20:23424613:T:C	rs3746736	20	23424613	T	C	C	0.1484	1.063	0.978906	1.1541	CSTL1	nonsynonymous SNV	CSTL1:NM_138283:exon3:c.T262C:p.W88R	0.4861	0	0.003	-0.597	Cystatin domain
7:100635767:G:C	rs34214710	7	100635767	G	C	C	0.1496	1.121	0.959983	1.30845	MUC12	nonsynonymous SNV	MUC12:NM_001164462:exon2:c.G1923C:p.K641N	0.1369	.	0.001	-0.925	.
1:153431406:C:G	rs3014837	1	153431406	C	G	G	0.1498	1.186	0.93688	1.4996	S100A7	nonsynonymous SNV	S100A7:NM_002963:exon2:c.G84C:p.E28D	0.9462	0	0.009	-0.422	EF-hand domain pair|S100/CaBP-9k-type, calcium binding, subdomain
5:5209210:G:A	rs16875054	5	5209210	G	A	A	0.15	1.167	0.94766	1.43585	ADAMTS16	nonsynonymous SNV	ADAMTS16:NM_139056:exon10:c.G1456A:p.A486T	0.0327	0.959	16.06	4.75	Metallopeptidase, catalytic domain|Peptidase M12B, ADAM/reprolysin
20:2321105:G:C	rs214830	20	2321105	G	C	C	0.1505	1.074	0.973361	1.18412	TGM3	nonsynonymous SNV	TGM3:NM_003245:exon13:c.G1960C:p.G654R	0.6394	0	11.54	3.4	Immunoglobulin-like fold|Transglutaminase, C-terminal
19:17108052:C:T	rs62622858	19	17108052	C	T	C	0.151	1.16822	0.9412	1.4486	CPAMD8	nonsynonymous SNV	CPAMD8:NM_015692:exon11:c.G1105A:p.V369M	0.0514	1	25	3	.
19:17108094:C:T	rs143454938	19	17108094	C	T	C	0.151	1.16822	0.9412	1.4486	CPAMD8	nonsynonymous SNV	CPAMD8:NM_015692:exon11:c.G1063A:p.V355I	0.0513	0.462	14.21	1.94	.
9:117846580:T:C	rs1061494	9	117846580	T	C	T	0.1518	1.0627	0.976989	1.15636	TNC	nonsynonymous SNV	TNC:NM_002160:exon4:c.A2039G:p.Q680R	0.4269	0.001	0.672	1.04	Fibronectin type III|Immunoglobulin-like fold
12:9321501:C:T	rs3213832	12	9321501	C	T	C	0.1519	1.14286	0.949139	1.3774	PZP	nonsynonymous SNV	PZP:NM_002864:exon17:c.G2071A:p.V691M	0.0501	0	0.233	-2.88	.
7:12391319:G:T	rs6967385	7	12391319	G	T	G	0.1522	1.06496	0.976051	1.15979	VWDE	nonsynonymous SNV	VWDE:NM_001346972:exon17:c.C3421A:p.Q1141K,VWDE:NM_001346973:exon17:c.C2956A:p.Q986K,VWDE:NM_001135924:exon19:c.C3766A:p.Q1256K	0.4093	0	0.003	-1.11	.
7:100639147:A:G	rs201573217	7	100639147	A	G	A	0.1534	1.07181	0.973322	1.17944	MUC12	nonsynonymous SNV	MUC12:NM_001164462:exon2:c.A5303G:p.E1768G	0.496	.	0.021	-2.43	.
7:100639177:C:T	rs200375956	7	100639177	C	T	C	0.1536	1.07181	0.973322	1.17944	MUC12	nonsynonymous SNV	MUC12:NM_001164462:exon2:c.C5333T:p.S1778L	0.5012	.	6.337	1.22	.
16:84906098:C:G	rs721005	16	84906098	C	G	G	0.1536	1.063	0.976989	1.15636	CRISPLD2	nonsynonymous SNV	CRISPLD2:NM_031476:exon9:c.C965G:p.T322S	0.3703	0.46	14.03	5.01	LCCL domain
15:39882178:A:G	rs2228262	15	39882178	A	G	G	0.1539	1.095	0.968042	1.23922	THBS1	nonsynonymous SNV	THBS1:NM_003246:exon13:c.A2099G:p.N700S	0.1215	0.994	26.4	5.99	.
1:208391098:T:C	rs11119014	1	208391098	T	C	T	0.1541	1.1274	0.954469	1.33189	PLXNA2	nonsynonymous SNV	PLXNA2:NM_025179:exon2:c.A170G:p.Q57R	0.0698	0	0.001	1.91	Sema domain|WD40/YVTN repeat-like-containing domain
19:9074950:G:T	rs2591591	19	9074950	G	T	T	0.1549	1.066	0.97609	1.16439	MUC16	nonsynonymous SNV	MUC16:NM_024690:exon3:c.C12496A:p.H4166N	0.2681	0.478	0.359	-2.4	.
4:168155178:A:G	rs11557043	4	168155178	A	G	A	0.1558	1.10375	0.961558	1.26516	SPOCK3	nonsynonymous SNV	SPOCK3:NM_001204355:exon2:c.T29C:p.L10P	0.1017	.	.	.	.
11:1017596:T:G	rs201522029	11	1017596	T	G	T	0.1559	1.21655	0.926408	1.5975	MUC6	nonsynonymous SNV	MUC6:NM_005961:exon31:c.A5205C:p.Q1735H	0.0602	0.996	0.003	-4.14	.
7:100639153:C:T	rs202107976	7	100639153	C	T	C	0.156	1.07181	0.973322	1.17944	MUC12	nonsynonymous SNV	MUC12:NM_001164462:exon2:c.C5309T:p.T1770M	0.5005	.	5.189	-0.258	.
3:195506494:G:T	NA	3	195506494	G	T	T	0.1561	1.355	0.897987	2.04541	MUC4	nonsynonymous SNV	MUC4:NM_018406:exon2:c.C11957A:p.P3986H	0.0225	0.997	8.11	.	.
4:84230619:T:C	rs11099592	4	84230619	T	C	C	0.1562	1.074	0.971455	1.18644	HPSE	nonsynonymous SNV	HPSE:NM_001199830:exon6:c.A746G:p.K249R,HPSE:NM_001098540:exon7:c.A920G:p.K307R,HPSE:NM_001166498:exon8:c.A920G:p.K307R,HPSE:NM_006665:exon8:c.A920G:p.K307R	0.7681	0.035	10.82	4.83	Glycoside hydrolase superfamily|Glycoside hydrolase, catalytic domain
21:46876306:G:A	rs11702494	21	46876306	G	A	A	0.1567	1.082	0.969708	1.20775	COL18A1	nonsynonymous SNV	COL18A1:NM_130444:exon1:c.G862A:p.A288T	0.2377	0.006	5.528	-9.89	.
6:65622463:A:G	rs9294631	6	65622463	A	G	A	0.1574	1.06157	0.977927	1.15295	EYS	nonsynonymous SNV	EYS:NM_001142800:exon16:c.T2555C:p.L852P,EYS:NM_001292009:exon16:c.T2555C:p.L852P	0.5918	0	5.12	3.08	EGF-like domain
14:95053890:G:A	rs6115	14	95053890	G	A	A	0.1575	1.067	0.975154	1.16784	SERPINA5	nonsynonymous SNV	SERPINA5:NM_000624:exon3:c.G191A:p.S64N	0.6584	0	0.146	4.11	Serpin domain
19:9076929:T:G	rs2547075	19	9076929	T	G	G	0.1577	1.066	0.97609	1.16439	MUC16	nonsynonymous SNV	MUC16:NM_024690:exon3:c.A10517C:p.K3506T	0.2687	0	0.34	0.596	.
14:94847262:T:A	rs17580	14	94847262	T	A	T	0.1581	1.17786	0.934933	1.4848	SERPINA1	nonsynonymous SNV	SERPINA1:NM_000295:exon3:c.A863T:p.E288V,SERPINA1:NM_001002235:exon3:c.A863T:p.E288V,SERPINA1:NM_001127700:exon3:c.A863T:p.E288V,SERPINA1:NM_001127702:exon4:c.A863T:p.E288V,SERPINA1:NM_001127706:exon4:c.A863T:p.E288V,SERPINA1:NM_001127707:exon4:c.A863T:p.E288V,SERPINA1:NM_001002236:exon5:c.A863T:p.E288V,SERPINA1:NM_001127701:exon5:c.A863T:p.E288V,SERPINA1:NM_001127703:exon5:c.A863T:p.E288V,SERPIN…	0.0389	0.998	25.1	5.18	Serpin domain
19:9075217:T:A	rs2547068	19	9075217	T	A	A	0.1582	1.066	0.97609	1.16439	MUC16	nonsynonymous SNV	MUC16:NM_024690:exon3:c.A12229T:p.T4077S	0.2688	0.376	0.188	-0.161	.
19:9075969:C:T	rs2591593	19	9075969	C	T	T	0.1582	1.066	0.975115	1.16323	MUC16	nonsynonymous SNV	MUC16:NM_024690:exon3:c.G11477A:p.G3826E	0.269	0.628	5.198	-0.571	.
19:9076083:G:A	rs2547072	19	9076083	G	A	A	0.1582	1.066	0.975115	1.16323	MUC16	nonsynonymous SNV	MUC16:NM_024690:exon3:c.C11363T:p.T3788I	0.2686	0.087	0.049	-3.8	.
19:9076728:C:T	rs2591594	19	9076728	C	T	T	0.1582	1.066	0.975115	1.16323	MUC16	nonsynonymous SNV	MUC16:NM_024690:exon3:c.G10718A:p.R3573H	0.2692	0	1.013	-2.79	.
19:9076950:C:A	rs2547076	19	9076950	C	A	A	0.1582	1.066	0.975115	1.16323	MUC16	nonsynonymous SNV	MUC16:NM_024690:exon3:c.G10496T:p.R3499M	0.269	0	4.638	0.457	.
19:9077436:G:A	rs1862462	19	9077436	G	A	A	0.1582	1.066	0.975115	1.16323	MUC16	nonsynonymous SNV	MUC16:NM_024690:exon3:c.C10010T:p.S3337L	0.269	0	0.605	-0.123	.
19:9077803:T:C	rs2591597	19	9077803	T	C	C	0.1582	1.066	0.975115	1.16323	MUC16	nonsynonymous SNV	MUC16:NM_024690:exon3:c.A9643G:p.S3215G	0.2686	0.001	0.01	0.813	.
20:44643111:G:A	rs17577	20	44643111	G	A	G	0.1584	1.08932	0.96603	1.22699	MMP9	nonsynonymous SNV	MMP9:NM_004994:exon12:c.G2003A:p.R668Q	0.1629	0.01	10.94	-9.33	Hemopexin-like domain
19:9076858:C:T	rs2547074	19	9076858	C	T	T	0.1585	1.066	0.97609	1.16439	MUC16	nonsynonymous SNV	MUC16:NM_024690:exon3:c.G10588A:p.V3530I	0.2693	0.194	3.665	-2.83	.
11:101765654:G:A	rs77315074	11	101765654	G	A	A	0.1591	1.179	0.941388	1.47757	ANGPTL5	nonsynonymous SNV	ANGPTL5:NM_178127:exon8:c.C803T:p.T268M	0.0292	0.967	23.2	5.38	Fibrinogen, alpha/beta/gamma chain, C-terminal globular domain|Fibrinogen, alpha/beta/gamma chain, C-terminal globular, subdomain 1
19:17017878:G:A	rs56408444	19	17017878	G	A	A	0.1595	1.076	0.971494	1.19115	CPAMD8	nonsynonymous SNV	CPAMD8:NM_015692:exon30:c.C4052T:p.A1351V	0.2002	0.068	4.366	-4.18	Alpha-macroglobulin complement component|Terpenoid cyclases/protein prenyltransferase alpha-alpha toroid
20:3650205:G:A	rs2280090	20	3650205	G	A	A	0.1603	1.112	0.960789	1.28917	ADAM33	nonsynonymous SNV	ADAM33:NM_153202:exon19:c.C2242T:p.P748S,ADAM33:NM_001282447:exon20:c.C2320T:p.P774S,ADAM33:NM_025220:exon20:c.C2320T:p.P774S	0.1499	0.061	3.415	-0.229	.
19:9024871:C:T	rs62118272	19	9024871	C	T	C	0.1604	1.16009	0.939244	1.4343	MUC16	nonsynonymous SNV	MUC16:NM_024690:exon16:c.G36991A:p.E12331K	0.0412	0.003	18.88	-3.11	SEA domain
1:152083325:A:T	rs11803731	1	152083325	A	T	T	0.1605	1.083	0.970678	1.20896	TCHH	nonsynonymous SNV	TCHH:NM_007113:exon3:c.T2368A:p.L790M	0.2333	0.989	3.389	-0.583	.
1:152281534:A:T	rs113544881	1	152281534	A	T	A	0.1618	1.10742	0.959752	1.27772	FLG	nonsynonymous SNV	FLG:NM_002016:exon3:c.T5828A:p.L1943H	0.1035	0	1.976	0.209	.
19:9063678:T:G	rs2547064	19	9063678	T	G	G	0.1621	1.065	0.975115	1.16323	MUC16	nonsynonymous SNV	MUC16:NM_024690:exon3:c.A23768C:p.D7923A	0.2681	0.197	0.027	0.103	.
7:100677630:C:T	rs78990442	7	100677630	C	T	T	0.1622	1.11	0.959791	1.28279	MUC17	nonsynonymous SNV	MUC17:NM_001040105:exon3:c.C2933T:p.P978L	0.1077	0.999	17.88	0.632	.
1:152283568:T:C	rs11581512	1	152283568	T	C	T	0.1626	1.32626	0.881897	1.99308	FLG	nonsynonymous SNV	FLG:NM_002016:exon3:c.A3794G:p.H1265R	0.0209	0	0.001	-6.78	.
1:152280110:C:T	rs138488969	1	152280110	C	T	C	0.1629	1.3245	0.881897	1.99308	FLG	nonsynonymous SNV	FLG:NM_002016:exon3:c.G7252A:p.V2418M	0.0208	0.96	16.24	-4.07	.
19:9065632:T:C	rs1867691	19	9065632	T	C	C	0.1629	1.065	0.975115	1.16323	MUC16	nonsynonymous SNV	MUC16:NM_024690:exon3:c.A21814G:p.I7272V	0.2679	0.001	0.001	-2.74	.
6:31002452:A:G	rs3869098	6	31002452	A	G	G	0.1633	1.069	0.973283	1.17478	MUC22	nonsynonymous SNV	MUC22:NM_001198815:exon5:c.A5059G:p.N1687D,MUC22:NM_001318484:exon5:c.A5068G:p.N1690D,MUC22:NM_001322469:exon6:c.A5068G:p.N1690D	0.4844	.	0.766	0.162	Mucin, catalytic, TM and cytoplasmic tail domain
11:73988167:C:T	rs2282488	11	73988167	C	T	T	0.1636	1.086	0.96692	1.21852	P4HA3	nonsynonymous SNV	P4HA3:NM_001288748:exon9:c.G1198A:p.D400N,P4HA3:NM_182904:exon9:c.G1198A:p.D400N	0.1756	0.956	22.1	5.2	Prolyl 4-hydroxylase, alpha subunit
19:8670147:C:T	rs62621197	19	8670147	C	T	C	0.1636	1.38696	0.863018	2.22848	ADAMTS10	nonsynonymous SNV	ADAMTS10:NM_030957:exon4:c.G185A:p.R62Q	0.0389	0.015	21	2.98	Peptidase M12B, propeptide
11:17663416:G:A	rs12422210	11	17663416	G	A	G	0.1639	1.10619	0.958793	1.27645	OTOG	nonsynonymous SNV	OTOG:NM_001277269:exon51:c.G8249A:p.R2750Q,OTOG:NM_001292063:exon52:c.G8213A:p.R2738Q	0.1588	.	15.73	1.63	.
7:100678407:G:A	rs4729649	7	100678407	G	A	A	0.1646	1.112	0.95795	1.29041	MUC17	nonsynonymous SNV	MUC17:NM_001040105:exon3:c.G3710A:p.S1237N	0.1086	0.01	0.02	-1.68	.
10:72513635:C:A	rs12774070	10	72513635	C	A	A	0.1647	1.069	0.972311	1.1736	ADAMTS14	nonsynonymous SNV	ADAMTS14:NM_080722:exon19:c.C2809A:p.L937M,ADAMTS14:NM_139155:exon19:c.C2818A:p.L940M	0.2726	0.99	24.6	3.68	.
1:152281007:A:G	rs7512553	1	152281007	A	G	A	0.1653	1.10865	0.956954	1.28403	FLG	nonsynonymous SNV	FLG:NM_002016:exon3:c.T6355C:p.Y2119H	0.1187	0	0.002	1.28	.
7:12376811:A:C	rs2192828	7	12376811	A	C	A	0.1656	1.06157	0.976012	1.15521	VWDE	nonsynonymous SNV	VWDE:NM_001346972:exon23:c.T4109G:p.F1370C,VWDE:NM_001346973:exon23:c.T3644G:p.F1215C,VWDE:NM_001135924:exon25:c.T4454G:p.F1485C	0.5749	0	18.57	4.86	EGF-like domain
7:100678514:A:G	rs138873624	7	100678514	A	G	A	0.1657	1.38122	0.859573	2.21958	MUC17	nonsynonymous SNV	MUC17:NM_001040105:exon3:c.A3817G:p.T1273A	0.0112	0.092	0.001	-0.942	.
3:195508367:G:A	rs55917029	3	195508367	G	A	A	0.1658	1.253	0.916127	1.71532	MUC4	nonsynonymous SNV	MUC4:NM_018406:exon2:c.C10084T:p.P3362S	0.0138	0.949	0.031	1.03	.
1:155026942:A:C	rs6427128	1	155026942	A	C	C	0.1661	1.088	0.965065	1.22576	ADAM15	nonsynonymous SNV	ADAM15:NM_001261464:exon6:c.A602C:p.K201T,ADAM15:NM_001261465:exon6:c.A572C:p.K191T,ADAM15:NM_001261466:exon6:c.A524C:p.K175T,ADAM15:NM_003815:exon6:c.A572C:p.K191T,ADAM15:NM_207191:exon6:c.A572C:p.K191T,ADAM15:NM_207194:exon6:c.A572C:p.K191T,ADAM15:NM_207195:exon6:c.A572C:p.K191T,ADAM15:NM_207196:exon6:c.A572C:p.K191T,ADAM15:NM_207197:exon6:c.A572C:p.K191T	0.8705	0	0.031	3.24	.
4:75937971:C:T	rs3822109	4	75937971	C	T	T	0.1663	1.073	0.970484	1.18526	PARM1	nonsynonymous SNV	PARM1:NM_015393:exon2:c.C380T:p.S127L	0.457	0	5.564	-3.27	.
11:1264292:C:T	rs61997210	11	1264292	C	T	C	0.1674	1.22549	0.914809	1.64056	MUC5B	nonsynonymous SNV	MUC5B:NM_002458:exon31:c.C6182T:p.A2061V	0.0557	0.435	2.118	-1.97	.
1:175092707:C:T	rs10798333	1	175092707	C	T	T	0.1678	1.06	0.97695	1.15179	TNN	nonsynonymous SNV	TNN:NM_022093:exon12:c.C2822T:p.T941M	0.4419	0.538	23.4	3.11	Fibronectin type III|Immunoglobulin-like fold
7:100677893:C:A	rs78263695	7	100677893	C	A	C	0.1679	1.40647	0.852314	2.3159	MUC17	nonsynonymous SNV	MUC17:NM_001040105:exon3:c.C3196A:p.P1066T	0.0233	0.023	11.78	-0.746	.
14:52508842:C:A	rs61747585	14	52508842	C	A	A	0.1685	1.152	0.944632	1.40349	NID2	nonsynonymous SNV	NID2:NM_007361:exon7:c.G1806T:p.E602D	0.036	0.542	24.6	4.11	G2 nidogen/fibulin G2F|Green fluorescent protein|Green fluorescent protein-like
11:1270647:G:C	rs185838223	11	1270647	G	C	G	0.1691	1.22399	0.913895	1.63892	MUC5B	nonsynonymous SNV	MUC5B:NM_002458:exon31:c.G12537C:p.Q4179H	0.0567	0.002	0.006	-7.25	WxxW domain
2:33505139:C:A	rs2290427	2	33505139	C	A	A	0.1692	1.202	0.929824	1.55389	LTBP1	nonsynonymous SNV	LTBP1:NM_000627:exon15:c.C2048A:p.P683Q,LTBP1:NM_001166264:exon15:c.C2048A:p.P683Q,LTBP1:NM_001166265:exon15:c.C1889A:p.P630Q,LTBP1:NM_001166266:exon15:c.C1889A:p.P630Q,LTBP1:NM_206943:exon19:c.C3026A:p.P1009Q	0.0182	0.999	32	5.53	EGF-like calcium-binding domain|EGF-like calcium-binding, conserved site|EGF-like domain|TB domain;EGF-like calcium-binding domain|EGF-like calcium-binding, conserved site|Growth factor receptor cysteine-rich domain;TB domain
12:6078424:A:T	rs35335161	12	6078424	A	T	A	0.1693	1.14679	0.940861	1.39788	VWF	nonsynonymous SNV	VWF:NM_000552:exon45:c.T7682A:p.F2561Y	0.0525	0.107	22.1	4.87	.
3:195510731:C:T	rs201326853	3	195510731	C	T	T	0.1698	1.264	0.910902	1.75298	MUC4	nonsynonymous SNV	MUC4:NM_018406:exon2:c.G7720A:p.A2574T	0.0135	0.749	8.799	-2.38	.
1:110466466:T:C	rs1058885	1	110466466	T	C	T	0.1704	1.06157	0.975037	1.15405	CSF1	nonsynonymous SNV	CSF1:NM_000757:exon6:c.T1223C:p.L408P,CSF1:NM_172212:exon6:c.T1223C:p.L408P	0.3542	0.002	0.004	-9.14	.
22:37578388:C:T	rs17812681	22	37578388	C	T	T	0.1709	1.246	0.916017	1.69506	C1QTNF6	nonsynonymous SNV	C1QTNF6:NM_031910:exon3:c.G677A:p.R226H,C1QTNF6:NM_182486:exon3:c.G677A:p.R226H	0.0216	1	34	4.94	C1q domain|Tumour necrosis factor-like domain
3:49162583:C:T	rs35713889	3	49162583	C	T	C	0.1713	1.15473	0.936393	1.42436	LAMB2	nonsynonymous SNV	LAMB2:NM_002292:exon20:c.G2740A:p.G914R	0.0385	1	34	5.98	Laminin EGF domain
9:113261483:C:T	rs872665	9	113261483	C	T	C	0.1713	1.06724	0.971339	1.17243	SVEP1	nonsynonymous SNV	SVEP1:NM_153366:exon7:c.G1519A:p.V507I	0.2485	0.983	11.95	5.91	Sushi/SCR/CCP domain
3:195506974:G:A	rs142066159	3	195506974	G	A	A	0.1716	1.21	0.924484	1.58173	MUC4	nonsynonymous SNV	MUC4:NM_018406:exon2:c.C11477T:p.P3826L	0.0165	0.994	13.09	.	.
19:9059827:A:G	rs76869876	19	9059827	A	G	A	0.1716	1.3624	0.859332	2.1589	MUC16	nonsynonymous SNV	MUC16:NM_024690:exon3:c.T27619C:p.S9207P	0.0105	0.963	2.017	-1.7	.
7:100636722:G:C	rs201822262	7	100636722	G	C	C	0.1717	1.116	0.954278	1.30578	MUC12	nonsynonymous SNV	MUC12:NM_001164462:exon2:c.G2878C:p.V960L	0.2222	.	0.003	-0.979	.
11:102650389:C:T	rs17293607	11	102650389	C	T	T	0.1718	1.083	0.966881	1.21371	MMP10	nonsynonymous SNV	MMP10:NM_002425:exon2:c.G193A:p.G65R	0.1306	0.015	22.5	3.34	Metallopeptidase, catalytic domain|Peptidoglycan binding-like;Peptidoglycan binding-like
4:155507590:T:C	rs6050	4	155507590	T	C	C	0.1721	1.07	0.970446	1.18057	FGA	nonsynonymous SNV	FGA:NM_000508:exon5:c.A991G:p.T331A,FGA:NM_021871:exon5:c.A991G:p.T331A	0.2518	0.001	0.002	-6.65	.
12:9246176:CTATGG:C	rs1799759	12	9246176	CTATGG	C	C	0.1732	1.082	0.96781	1.21012	A2M	.	.	0.1471	.	.	.	.
1:150526044:G:C	rs41317515	1	150526044	G	C	G	0.1734	1.06952	0.970446	1.18057	ADAMTSL4	nonsynonymous SNV	ADAMTSL4:NM_001288607:exon6:c.G577C:p.A193P,ADAMTSL4:NM_001288608:exon6:c.G577C:p.A193P,ADAMTSL4:NM_019032:exon6:c.G577C:p.A193P,ADAMTSL4:NM_025008:exon6:c.G577C:p.A193P	0.5133	0	0.007	-4.57	.
6:30996210:G:T	NA	6	30996210	G	T	G	0.1737	1.29032	0.884016	1.88378	MUC22	nonsynonymous SNV	MUC22:NM_001198815:exon3:c.G3002T:p.G1001V,MUC22:NM_001318484:exon3:c.G3011T:p.G1004V,MUC22:NM_001322469:exon3:c.G3011T:p.G1004V	0.0132	.	0.004	-6.24	.
2:3691548:A:G	rs7567833	2	3691548	A	G	G	0.1739	1.166	0.93748	1.44855	COLEC11	nonsynonymous SNV	COLEC11:NM_001255989:exon4:c.A434G:p.H145R,COLEC11:NM_001255984:exon5:c.A512G:p.H171R,COLEC11:NM_001255987:exon5:c.A506G:p.H169R,COLEC11:NM_001255988:exon5:c.A506G:p.H169R,COLEC11:NM_001255982:exon6:c.A584G:p.H195R,COLEC11:NM_001255983:exon6:c.A584G:p.H195R,COLEC11:NM_001255986:exon6:c.A578G:p.H193R,COLEC11:NM_024027:exon7:c.A656G:p.H219R,COLEC11:NM_001255985:exon8:c.A698G:p.H233R,COLEC11:NM_1992…	0.035	0	0.05	5.3	C-type lectin|C-type lectin fold|C-type lectin-like;C-type lectin|C-type lectin-like
4:109863370:C:T	rs17531474	4	109863370	C	T	T	0.1741	1.099	0.959599	1.25764	COL25A1	nonsynonymous SNV	COL25A1:NM_001256074:exon7:c.G547A:p.V183I	0.1399	.	20.7	5.54	.
9:21440994:C:G	rs33965070	9	21440994	C	G	G	0.1742	1.106	0.956916	1.27895	IFNA1	nonsynonymous SNV	IFNA1:NM_024013:exon1:c.C488G:p.A163G	0.0929	0.928	26.8	3.17	Four-helical cytokine, core|Four-helical cytokine-like, core
6:30993813:G:A	rs62399429	6	30993813	G	A	A	0.1749	1.083	0.964988	1.21609	MUC22	nonsynonymous SNV	MUC22:NM_001198815:exon3:c.G605A:p.S202N,MUC22:NM_001318484:exon3:c.G614A:p.S205N,MUC22:NM_001322469:exon3:c.G614A:p.S205N	0.1672	.	0.005	-5.35	.
3:195516980:A:G	rs11923648	3	195516980	A	G	G	0.1759	1.178	0.933103	1.48771	MUC4	nonsynonymous SNV	MUC4:NM_018406:exon2:c.T1471C:p.S491P	0.0207	0.053	0.014	-4.61	.
3:47610572:C:T	rs150574744	3	47610572	C	T	T	0.1761	1.22	0.92013	1.61808	CSPG5	nonsynonymous SNV	CSPG5:NM_001206943:exon4:c.G1528A:p.V510I,CSPG5:NM_001206945:exon4:c.G1114A:p.V372I	0.0201	0.009	12.17	0.043	Neural chondroitin sulphate proteoglycan cytoplasmic
7:103251161:G:C	rs362691	7	103251161	G	C	G	0.1764	1.09769	0.956763	1.25885	RELN	nonsynonymous SNV	RELN:NM_005045:exon22:c.C2989G:p.L997V,RELN:NM_173054:exon22:c.C2989G:p.L997V	0.1077	0.185	11.03	4.36	Sialidases
12:40837264:T:C	rs11564230	12	40837264	T	C	T	0.1766	1.10497	0.954087	1.28018	MUC19	.	.	0.0924	.	.	.	.
1:175087885:A:G	rs6694078	1	175087885	A	G	A	0.1767	1.08225	0.964023	1.21487	TNN	nonsynonymous SNV	TNN:NM_022093:exon11:c.A2575G:p.M859V	0.1543	0	0.001	0.971	Fibronectin type III|Immunoglobulin-like fold
15:60653205:C:A	rs17845226	15	60653205	C	A	A	0.1769	1.11	0.954164	1.29036	ANXA2	nonsynonymous SNV	ANXA2:NM_001002858:exon5:c.G346T:p.V116L,ANXA2:NM_004039:exon5:c.G292T:p.V98L,ANXA2:NM_001002857:exon6:c.G292T:p.V98L,ANXA2:NM_001136015:exon6:c.G292T:p.V98L	0.1287	0.003	21	5.4	Annexin repeat, conserved site
7:7561580:T:C	rs10486180	7	7561580	T	C	C	0.1778	1.112	0.954202	1.29548	COL28A1	nonsynonymous SNV	COL28A1:NM_001037763:exon5:c.A715G:p.I239V	0.0764	0.009	13.22	3.49	.
11:120989335:A:G	rs612969	11	120989335	A	G	G	0.1782	1.059	0.974998	1.14949	TECTA	nonsynonymous SNV	TECTA:NM_005422:exon6:c.A1111G:p.R371G	0.4288	0	5.253	3.86	von Willebrand factor, type D domain
19:9076278:G:A	rs953551	19	9076278	G	A	A	0.1797	1.061	0.973128	1.15632	MUC16	nonsynonymous SNV	MUC16:NM_024690:exon3:c.C11168T:p.T3723M	0.3113	0.001	2.042	-1.07	.
1:226074563:T:G	rs360057	1	226074563	T	G	T	0.1804	1.06157	0.972194	1.15974	LEFTY1	nonsynonymous SNV	LEFTY1:NM_020997:exon4:c.A965C:p.D322A	0.357	0	0.02	2.09	Cystine-knot cytokine|Transforming growth factor-beta, C-terminal
19:9006749:C:T	rs75444444	19	9006749	C	T	C	0.1812	1.09051	0.958525	1.24155	MUC16	nonsynonymous SNV	MUC16:NM_024690:exon44:c.G39499A:p.V13167M	0.3205	0.932	13.68	-3.6	SEA domain
6:74497102:G:A	rs35466124	6	74497102	G	A	G	0.1815	1.2285	0.901514	1.67478	CD109	nonsynonymous SNV	CD109:NM_001159588:exon20:c.G2252A:p.G751E,CD109:NM_001159587:exon21:c.G2483A:p.G828E,CD109:NM_133493:exon21:c.G2483A:p.G828E	0.0264	1	25.9	5.45	Alpha-2-macroglobulin|Immunoglobulin E-set
6:65300143:G:C	rs16895517	6	65300143	G	C	G	0.1825	1.08578	0.961251	1.22571	EYS	nonsynonymous SNV	EYS:NM_001142800:exon26:c.C5617G:p.L1873V,EYS:NM_001292009:exon26:c.C5617G:p.L1873V	0.1254	0.001	0.002	1.96	.
7:100677523:A:C	rs10238201	7	100677523	A	C	C	0.1827	1.1	0.957758	1.26511	MUC17	nonsynonymous SNV	MUC17:NM_001040105:exon3:c.A2826C:p.R942S	0.1312	0	0.006	-1.68	.
10:88696622:C:G	rs34587013	10	88696622	C	G	C	0.1827	1.11235	0.950469	1.30057	MMRN2	nonsynonymous SNV	MMRN2:NM_024756:exon7:c.G2728C:p.V910L	0.0785	0.351	12.21	0.706	C1q domain|Tumour necrosis factor-like domain
7:100635375:A:C	rs10808115	7	100635375	A	C	A	0.1834	1.06496	0.9713	1.1678	MUC12	nonsynonymous SNV	MUC12:NM_001164462:exon2:c.A1531C:p.S511R	0.5183	.	0.265	0.695	.
19:49261368:T:C	rs739320	19	49261368	T	C	T	0.1838	1.07759	0.965837	1.20293	FGF21	nonsynonymous SNV	FGF21:NM_019113:exon4:c.T521C:p.L174P	0.6527	0	0.3	0.608	.
5:38406251:C:T	rs113400125	5	38406251	C	T	C	0.1848	1.19332	0.912543	1.5613	EGFLAM	nonsynonymous SNV	EGFLAM:NM_182798:exon2:c.C34T:p.R12C,EGFLAM:NM_001205301:exon7:c.C736T:p.R246C,EGFLAM:NM_152403:exon7:c.C736T:p.R246C	0.0288	0.002	21.5	3.23	.
6:65303100:T:C	rs17404123	6	65303100	T	C	T	0.1849	1.0846	0.96029	1.22448	EYS	nonsynonymous SNV	EYS:NM_001142800:exon25:c.A3787G:p.I1263V,EYS:NM_001292009:exon25:c.A3787G:p.I1263V	0.1254	0	0.001	0.768	.
6:65301211:T:C	rs62415826	6	65301211	T	C	T	0.1852	1.0846	0.96029	1.22448	EYS	nonsynonymous SNV	EYS:NM_001142800:exon26:c.A4549G:p.S1517G,EYS:NM_001292009:exon26:c.A4549G:p.S1517G	0.1248	0.001	0.001	2.04	.
6:65301217:G:A	rs62415827	6	65301217	G	A	G	0.1852	1.0846	0.96029	1.22448	EYS	nonsynonymous SNV	EYS:NM_001142800:exon26:c.C4543T:p.R1515W,EYS:NM_001292009:exon26:c.C4543T:p.R1515W	0.1248	0.998	17.85	0.078	.
6:65301408:A:G	rs62415828	6	65301408	A	G	A	0.1852	1.0846	0.96029	1.22448	EYS	nonsynonymous SNV	EYS:NM_001142800:exon26:c.T4352C:p.I1451T,EYS:NM_001292009:exon26:c.T4352C:p.I1451T	0.1257	0	0.003	0.462	.
6:65301679:T:C	rs17403955	6	65301679	T	C	T	0.1852	1.0846	0.96029	1.22448	EYS	nonsynonymous SNV	EYS:NM_001142800:exon26:c.A4081G:p.I1361V,EYS:NM_001292009:exon26:c.A4081G:p.I1361V	0.1254	0.001	0.002	-1.16	.
6:65301787:G:C	rs12663622	6	65301787	G	C	G	0.1852	1.0846	0.96029	1.22448	EYS	nonsynonymous SNV	EYS:NM_001142800:exon26:c.C3973G:p.Q1325E,EYS:NM_001292009:exon26:c.C3973G:p.Q1325E	0.1253	0	0.001	-2.6	.
9:27524364:G:GTGTT	rs144060127	9	27524364	G	GTGTT	G	0.1853	1.18624	0.917814	1.53382	IFNK	frameshift insertion	IFNK:NM_020124:exon1:c.30_31insTGTT:p.K10fs	0.0325	.	.	.	.
4:106859549:G:C	rs35132891	4	106859549	G	C	G	0.1857	1.09649	0.957682	1.25513	NPNT	nonsynonymous SNV	NPNT:NM_001033047:exon5:c.G477C:p.Q159H,NPNT:NM_001184692:exon5:c.G477C:p.Q159H,NPNT:NM_001184690:exon6:c.G528C:p.Q176H,NPNT:NM_001184691:exon6:c.G567C:p.Q189H,NPNT:NM_001184693:exon6:c.G567C:p.Q189H	0.2938	0.997	16.53	3.49	EGF-like calcium-binding domain|EGF-like calcium-binding, conserved site|EGF-like domain|Growth factor receptor cysteine-rich domain;EGF-like domain|Growth factor receptor cysteine-rich domain
1:150955582:A:G	rs267731	1	150955582	A	G	A	0.1866	1.16144	0.926446	1.45412	ANXA9	nonsynonymous SNV	ANXA9:NM_003568:exon3:c.A1G:p.M1V	0.0345	0.001	23.1	3.94	.
4:73414286:C:T	rs788908	4	73414286	C	T	T	0.1866	1.058	0.974023	1.14834	ADAMTS3	nonsynonymous SNV	ADAMTS3:NM_014243:exon3:c.G413A:p.R138K	0.6136	0	14.89	4.64	Peptidase M12B, propeptide
11:63277334:A:G	rs117587231	11	63277334	A	G	A	0.1866	1.30039	0.869532	1.94216	LGALS12	nonsynonymous SNV	LGALS12:NM_001142537:exon3:c.A340G:p.I114V,LGALS12:NM_001142538:exon3:c.A340G:p.I114V,LGALS12:NM_001142535:exon4:c.A526G:p.I176V,LGALS12:NM_001142536:exon4:c.A523G:p.I175V,LGALS12:NM_033101:exon4:c.A523G:p.I175V	0.0163	0.005	0.361	4.42	Concanavalin A-like lectin/glucanase domain|Galectin, carbohydrate recognition domain
1:175049379:G:A	rs16847812	1	175049379	G	A	G	0.1873	1.08108	0.96306	1.21366	TNN	nonsynonymous SNV	TNN:NM_022093:exon4:c.G865A:p.D289N	0.1487	0.109	23.2	5.69	Fibronectin type III|Immunoglobulin-like fold
6:33131501:G:A	rs2229792	6	33131501	G	A	G	0.1874	1.221	0.899641	1.65825	COL11A2	nonsynonymous SNV	COL11A2:NM_080679:exon63:c.C4844T:p.P1615L,COL11A2:NM_080681:exon64:c.C4907T:p.P1636L,COL11A2:NM_080680:exon66:c.C5165T:p.P1722L	0.0322	0.861	20.3	4.06	Fibrillar collagen, C-terminal
9:137779026:C:T	rs17549193	9	137779026	C	T	T	0.1879	1.062	0.97029	1.16202	FCN2	nonsynonymous SNV	FCN2:NM_015837:exon7:c.C593T:p.T198M,FCN2:NM_004108:exon8:c.C707T:p.T236M	0.2978	0.838	21.2	2.06	Fibrinogen, alpha/beta/gamma chain, C-terminal globular domain|Fibrinogen, alpha/beta/gamma chain, C-terminal globular, subdomain 1
7:100636207:C:A	rs147681181	7	100636207	C	A	A	0.188	1.112	0.950469	1.30057	MUC12	nonsynonymous SNV	MUC12:NM_001164462:exon2:c.C2363A:p.T788N	0.135	.	0.004	-0.962	.
11:102477377:G:T	rs1784424	11	102477377	G	T	G	0.1881	1.05708	0.97305	1.1472	MMP20	nonsynonymous SNV	MMP20:NM_004771:exon6:c.C842A:p.T281N	0.4337	0	0.002	2.3	.
11:102477395:A:G	rs1784423	11	102477395	A	G	A	0.1881	1.05708	0.97305	1.1472	MMP20	nonsynonymous SNV	MMP20:NM_004771:exon6:c.T824C:p.V275A	0.4341	0	0.027	4.53	.
2:69093413:G:A	rs34008398	2	69093413	G	A	A	0.1892	1.268	0.897664	1.78954	BMP10	nonsynonymous SNV	BMP10:NM_014482:exon2:c.C625T:p.R209C	0.0111	0.972	26.1	4.57	Transforming growth factor-beta, N-terminal
19:9003618:C:T	rs11085776	19	9003618	C	T	T	0.1894	1.066	0.968468	1.17356	MUC16	nonsynonymous SNV	MUC16:NM_024690:exon49:c.G40022A:p.R13341H	0.7382	0.229	0.291	-6.47	SEA domain
16:22137603:G:A	rs55732851	16	22137603	G	A	G	0.1897	1.11111	0.94675	1.30567	VWA3A	nonsynonymous SNV	VWA3A:NM_173615:exon17:c.G1637A:p.C546Y	0.067	0	0.001	-9.94	von Willebrand factor, type A
20:3650234:A:G	rs2280091	20	3650234	A	G	G	0.1901	1.104	0.953134	1.2789	ADAM33	nonsynonymous SNV	ADAM33:NM_153202:exon19:c.T2213C:p.M738T,ADAM33:NM_001282447:exon20:c.T2291C:p.M764T,ADAM33:NM_025220:exon20:c.T2291C:p.M764T	0.1506	0.131	0.019	1.16	.
19:9001833:A:G	rs12976122	19	9001833	A	G	G	0.1906	1.064	0.968429	1.16892	MUC16	nonsynonymous SNV	MUC16:NM_024690:exon53:c.T40415C:p.M13472T	0.7242	0.076	0.058	-0.09	SEA domain
7:12406989:C:G	rs6460939	7	12406989	C	G	G	0.1916	1.056	0.97305	1.1472	VWDE	nonsynonymous SNV	VWDE:NM_001346972:exon11:c.G2547C:p.K849N,VWDE:NM_001346973:exon11:c.G2082C:p.K694N,VWDE:NM_001135924:exon13:c.G2892C:p.K964N	0.4629	0.997	22.5	0.145	.
15:65494212:A:G	rs2073711	15	65494212	A	G	A	0.1919	1.05708	0.97305	1.1472	CILP	nonsynonymous SNV	CILP:NM_003613:exon8:c.T1184C:p.I395T	0.6177	0	14.93	3.4	.
7:7545691:G:C	rs10486176	7	7545691	G	C	G	0.1921	1.0917	0.95573	1.24767	COL28A1	nonsynonymous SNV	COL28A1:NM_001037763:exon11:c.C980G:p.T327S	0.1181	0	4.778	1.68	.
19:9071763:T:A	rs10422567	19	9071763	T	A	A	0.1929	1.08	0.962097	1.21245	MUC16	nonsynonymous SNV	MUC16:NM_024690:exon3:c.A15683T:p.N5228I	0.8316	0	3.1	0.647	.
7:100647338:C:A	rs199551523	7	100647338	C	A	C	0.1931	1.06838	0.96661	1.18053	MUC12	nonsynonymous SNV	MUC12:NM_001164462:exon2:c.C13494A:p.D4498E	0.6117	.	4.604	-1.8	.
7:100647339:G:A	rs200522765	7	100647339	G	A	G	0.1931	1.06838	0.96661	1.18053	MUC12	nonsynonymous SNV	MUC12:NM_001164462:exon2:c.G13495A:p.A4499T	0.6147	.	1.034	-1.8	.
15:89456544:G:T	rs4945	15	89456544	G	T	T	0.1942	1.064	0.970329	1.16663	MFGE8	nonsynonymous SNV	MFGE8:NM_001114614:exon1:c.C7A:p.R3S,MFGE8:NM_001310319:exon1:c.C7A:p.R3S,MFGE8:NM_005928:exon1:c.C7A:p.R3S	0.3283	0.065	5.142	-0.479	.
2:33484666:C:G	rs61754245	2	33484666	C	G	G	0.1943	1.191	0.919689	1.54299	LTBP1	nonsynonymous SNV	LTBP1:NM_000627:exon9:c.C1429G:p.P477A,LTBP1:NM_001166264:exon9:c.C1429G:p.P477A,LTBP1:NM_001166265:exon9:c.C1270G:p.P424A,LTBP1:NM_001166266:exon9:c.C1270G:p.P424A,LTBP1:NM_206943:exon13:c.C2407G:p.P803A	0.0182	0	14.12	2	EGF-like domain|EGF-like, conserved site
7:12433347:C:T	rs17165995	7	12433347	C	T	C	0.1947	1.08578	0.95749	1.23052	VWDE	nonsynonymous SNV	VWDE:NM_001135924:exon2:c.G116A:p.R39H,VWDE:NM_001346972:exon2:c.G116A:p.R39H	0.1093	0	14	2.49	.
6:64498055:T:A	rs66462731	6	64498055	T	A	A	0.1948	1.105	0.952219	1.28269	EYS	nonsynonymous SNV	EYS:NM_001142800:exon39:c.A7666T:p.S2556C,EYS:NM_001292009:exon39:c.A7666T:p.S2556C	0.0889	0.99	25.3	2.92	Concanavalin A-like lectin/glucanase domain|Laminin G domain
11:102401411:A:C	rs55701929	11	102401411	A	C	A	0.1963	1.21951	0.896085	1.65818	MMP7	nonsynonymous SNV	MMP7:NM_002423:exon1:c.T21G:p.C7W	0.0165	0.038	0.007	-9.96	.
11:102595579:G:C	rs17099450	11	102595579	G	C	C	0.1969	1.133	0.938793	1.36774	MMP8	nonsynonymous SNV	MMP8:NM_002424:exon1:c.C8G:p.S3C	0.0482	0	0.001	-10.2	.
3:195511043:T:C	rs75030029	3	195511043	T	C	T	0.197	1.15473	0.927261	1.43838	MUC4	nonsynonymous SNV	MUC4:NM_018406:exon2:c.A7408G:p.T2470A	0.0799	0.886	0.227	1.04	.
1:152280900:T:G	rs74129452	1	152280900	T	G	T	0.1977	1.09051	0.954775	1.24643	FLG	nonsynonymous SNV	FLG:NM_002016:exon3:c.A6462C:p.Q2154H	0.1165	0	0.001	-5.18	.
1:22165963:T:C	rs139500146	1	22165963	T	C	C	0.1978	1.25	0.897412	1.74062	HSPG2	nonsynonymous SNV	HSPG2:NM_001291860:exon73:c.A9793G:p.I3265V,HSPG2:NM_005529:exon73:c.A9790G:p.I3264V	0.0156	0	0.005	-3.26	Immunoglobulin I-set|Immunoglobulin subtype 2|Immunoglobulin-like domain|Immunoglobulin-like fold
10:98172999:C:T	rs41291632	10	98172999	C	T	C	0.1979	1.25945	0.876692	1.81049	TLL2	nonsynonymous SNV	TLL2:NM_012465:exon8:c.G998A:p.R333Q	0.0158	0.227	24.5	5.28	Metallopeptidase, catalytic domain|Peptidase M12A, astacin
14:52535648:G:T	rs3920038	14	52535648	G	T	G	0.1994	1.08108	0.961174	1.21604	NID2	nonsynonymous SNV	NID2:NM_007361:exon1:c.C65A:p.P22Q	0.8824	0.002	9.372	1.49	.
14:94844947:C:T	rs28929474	14	94844947	C	T	T	0.1997	1.2	0.913529	1.57529	SERPINA1	nonsynonymous SNV	SERPINA1:NM_000295:exon5:c.G1096A:p.E366K,SERPINA1:NM_001002235:exon5:c.G1096A:p.E366K,SERPINA1:NM_001127700:exon5:c.G1096A:p.E366K,SERPINA1:NM_001127702:exon6:c.G1096A:p.E366K,SERPINA1:NM_001127706:exon6:c.G1096A:p.E366K,SERPINA1:NM_001127707:exon6:c.G1096A:p.E366K,SERPINA1:NM_001002236:exon7:c.G1096A:p.E366K,SERPINA1:NM_001127701:exon7:c.G1096A:p.E366K,SERPINA1:NM_001127703:exon7:c.G1096A:p.E36…	0.0178	1	26	2.95	Serpin domain
9:14842557:T:C	rs1353223	9	14842557	T	C	T	0.2003	1.11732	0.942217	1.32514	FREM1	nonsynonymous SNV	FREM1:NM_144966:exon10:c.A1495G:p.I499V	0.0688	0.995	23.8	5.63	.
12:48391657:T:A	rs34392760	12	48391657	T	A	A	0.2009	1.137	0.93703	1.38132	COL2A1	nonsynonymous SNV	COL2A1:NM_033150:exon5:c.A219T:p.E73D,COL2A1:NM_001844:exon6:c.A426T:p.E142D	0.0552	0.002	14.6	3.91	VWFC domain
2:37035934:A:G	rs2072526	2	37035934	A	G	G	0.2012	1.149	0.931723	1.41725	VIT	nonsynonymous SNV	VIT:NM_001177970:exon13:c.A1601G:p.K534R,VIT:NM_001177971:exon13:c.A1598G:p.K533R,VIT:NM_001177969:exon14:c.A1664G:p.K555R,VIT:NM_001328661:exon14:c.A1643G:p.K548R,VIT:NM_053276:exon15:c.A1709G:p.K570R	0.0332	0.999	22	4.12	von Willebrand factor, type A
4:25005356:T:C	rs2232027	4	25005356	T	C	C	0.2022	1.136	0.936993	1.37586	LGI2	nonsynonymous SNV	LGI2:NM_018176:exon8:c.A1355G:p.Q452R	0.0397	0.009	16.63	4.58	.
4:71347333:C:T	rs72655156	4	71347333	C	T	C	0.2025	1.20773	0.898562	1.62411	MUC7	nonsynonymous SNV	MUC7:NM_152291:exon3:c.C872T:p.T291I,MUC7:NM_001145006:exon4:c.C872T:p.T291I,MUC7:NM_001145007:exon4:c.C872T:p.T291I	0.0207	0.998	17.49	1.52	.
1:39957913:A:G	rs4660269	1	39957913	A	G	G	0.2035	1.098	0.949291	1.26876	BMP8A	nonsynonymous SNV	BMP8A:NM_181809:exon1:c.A250G:p.M84V	0.9106	0.008	11.36	3.32	Transforming growth factor-beta, N-terminal
6:31540784:C:A	rs1041981	6	31540784	C	A	C	0.2037	1.06724	0.965644	1.17935	LTA	nonsynonymous SNV	LTA:NM_000595:exon3:c.C179A:p.T60N,LTA:NM_001159740:exon3:c.C179A:p.T60N	0.3457	0.019	13.46	3.15	.
6:46801219:G:A	rs62622418	6	46801219	G	A	G	0.2039	1.15473	0.92002	1.4497	MEP1A	nonsynonymous SNV	MEP1A:NM_005588:exon11:c.G1553A:p.R518Q	0.0301	0.004	6.382	-5.97	MATH/TRAF domain|TRAF-like
9:14801710:C:A	rs35870000	9	14801710	C	A	C	0.204	1.05708	0.969243	1.1517	FREM1	nonsynonymous SNV	FREM1:NM_144966:exon21:c.G3634T:p.A1212S	0.3515	0.003	2.212	1.79	.
13:102480271:T:A	rs9518577	13	102480271	T	A	T	0.2048	1.05932	0.969282	1.15627	FGF14	nonsynonymous SNV	FGF14:NM_001321937:exon4:c.A425T:p.K142I	0.3681	.	.	.	.
19:48519241:C:G	rs3745751	19	48519241	C	G	G	0.2056	1.228	0.897987	1.68135	ELSPBP1	nonsynonymous SNV	ELSPBP1:NM_022142:exon4:c.C300G:p.C100W	0.0609	1	25.4	2.5	Fibronectin, type II, collagen-binding|Kringle-like fold
1:120437884:A:G	rs2641348	1	120437884	A	G	A	0.2057	1.0917	0.951991	1.25257	ADAM30	nonsynonymous SNV	ADAM30:NM_021794:exon1:c.T1076C:p.L359P	0.1139	0.002	0.07	-9.26	Metallopeptidase, catalytic domain|Peptidase M12B, ADAM/reprolysin
2:96798440:C:T	rs61735195	2	96798440	C	T	C	0.2058	1.23457	0.882356	1.72488	ASTL	nonsynonymous SNV	ASTL:NM_001002036:exon6:c.G476A:p.R159H	0.0164	0.952	29.9	3.69	Metallopeptidase, catalytic domain|Peptidase M12A, astacin|Peptidase, metallopeptidase
7:100639054:G:A	rs56353590	7	100639054	G	A	G	0.2058	1.06952	0.964756	1.18754	MUC12	nonsynonymous SNV	MUC12:NM_001164462:exon2:c.G5210A:p.R1737H	0.4632	.	5.92	-2.08	.
6:65149185:T:A	rs9353806	6	65149185	T	A	A	0.2064	1.062	0.96839	1.1643	EYS	nonsynonymous SNV	EYS:NM_001142800:exon27:c.A5705T:p.N1902I,EYS:NM_001292009:exon27:c.A5705T:p.N1902I	0.2921	0.848	22.1	-1.38	Concanavalin A-like lectin/glucanase domain|Laminin G domain
9:18777304:C:T	rs183130162	9	18777304	C	T	T	0.2068	1.185	0.914187	1.53376	ADAMTSL1	nonsynonymous SNV	ADAMTSL1:NM_001040272:exon19:c.C3077T:p.S1026F	0.0259	0.944	23.5	5.75	.
7:100681221:G:C	rs147785825	7	100681221	G	C	G	0.2071	1.15473	0.92002	1.4497	MUC17	nonsynonymous SNV	MUC17:NM_001040105:exon3:c.G6524C:p.S2175T	0.0427	0.045	0.065	-1.37	.
6:112457383:G:C	rs1050349	6	112457383	G	C	G	0.2072	1.06496	0.96464	1.17351	LAMA4	nonsynonymous SNV	LAMA4:NM_001105206:exon25:c.C3356G:p.P1119R,LAMA4:NM_001105207:exon25:c.C3335G:p.P1112R,LAMA4:NM_002290:exon25:c.C3335G:p.P1112R	0.2516	1	23.7	5.93	Concanavalin A-like lectin/glucanase domain|Laminin G domain
16:84902483:A:T	rs72799568	16	84902483	A	T	T	0.2087	1.153	0.926334	1.43695	CRISPLD2	nonsynonymous SNV	CRISPLD2:NM_031476:exon8:c.A880T:p.M294L	0.0434	0.001	6.968	0.151	LCCL domain
7:12419108:A:T	rs6967241	7	12419108	A	T	T	0.2089	1.059	0.967384	1.15854	VWDE	nonsynonymous SNV	VWDE:NM_001135924:exon6:c.T874A:p.F292I,VWDE:NM_001346972:exon6:c.T874A:p.F292I,VWDE:NM_001346973:exon6:c.T409A:p.F137I	0.6946	0	13.31	4.61	.
8:121298156:G:C	rs17833992	8	121298156	G	C	C	0.209	1.077	0.961097	1.20645	COL14A1	nonsynonymous SNV	COL14A1:NM_021110:exon33:c.G4024C:p.V1342L	0.153	0.033	18.47	3.17	Concanavalin A-like lectin/glucanase domain|Laminin G domain
6:30993880:G:C	rs62399431	6	30993880	G	C	C	0.2094	1.078	0.958295	1.2124	MUC22	nonsynonymous SNV	MUC22:NM_001198815:exon3:c.G672C:p.E224D,MUC22:NM_001318484:exon3:c.G681C:p.E227D,MUC22:NM_001322469:exon3:c.G681C:p.E227D	0.1552	.	0.002	-4.29	.
7:87754915:G:A	rs17255978	7	87754915	G	A	G	0.2096	1.14811	0.923523	1.42698	ADAM22	nonsynonymous SNV	ADAM22:NM_001324417:exon8:c.G616A:p.V206I,ADAM22:NM_001324418:exon8:c.G619A:p.V207I,ADAM22:NM_001324419:exon8:c.G616A:p.V206I,ADAM22:NM_001324420:exon8:c.G619A:p.V207I,ADAM22:NM_001324421:exon8:c.G619A:p.V207I,ADAM22:NM_004194:exon8:c.G619A:p.V207I,ADAM22:NM_016351:exon8:c.G619A:p.V207I,ADAM22:NM_021721:exon8:c.G619A:p.V207I,ADAM22:NM_021722:exon8:c.G619A:p.V207I,ADAM22:NM_021723:exon8:c.G619A:p.…	0.0499	0	18.45	1.35	.
1:150531905:C:A	rs150225445	1	150531905	C	A	C	0.211	1.37741	0.82244	2.30592	ADAMTSL4	nonsynonymous SNV	ADAMTSL4:NM_019032:exon17:c.C2906A:p.A969D,ADAMTSL4:NM_001288607:exon18:c.C2789A:p.A930D,ADAMTSL4:NM_001288608:exon18:c.C2975A:p.A992D	0.012	0.002	14.05	-0.118	.
1:161163037:T:C	rs4233367	1	161163037	T	C	T	0.2112	1.05485	0.971106	1.1449	ADAMTS4	nonsynonymous SNV	ADAMTS4:NM_001320336:exon7:c.A1877G:p.Q626R,ADAMTS4:NM_005099:exon7:c.A1877G:p.Q626R	0.5849	0	5.021	1.94	.
19:9070837:G:A	rs2547067	19	9070837	G	A	A	0.2122	1.076	0.958256	1.20761	MUC16	nonsynonymous SNV	MUC16:NM_024690:exon3:c.C16609T:p.P5537S	0.8314	0	0.042	-2	.
1:153410777:A:G	rs61742168	1	153410777	A	G	G	0.2125	1.22	0.898741	1.65659	S100A7L2	nonsynonymous SNV	S100A7L2:NM_001045479:exon2:c.T62C:p.M21T	0.0144	0	0.003	0.623	EF-hand domain pair
8:24207438:G:A	rs7829965	8	24207438	G	A	G	0.214	1.16822	0.909482	1.50212	ADAM28	nonsynonymous SNV	ADAM28:NM_001304351:exon19:c.G2052A:p.M684I,ADAM28:NM_014265:exon19:c.G2052A:p.M684I	0.0217	0	0.003	-0.579	.
3:44943104:G:C	rs937838	3	44943104	G	C	C	0.2142	1.103	0.946599	1.28516	TGM4	nonsynonymous SNV	TGM4:NM_003241:exon7:c.G746C:p.S249T	0.099	0.999	23.5	2.84	Transglutaminase-like
1:20680718:G:A	rs2072751	1	20680718	G	A	G	0.2144	1.0627	0.965567	1.17004	VWA5B1	nonsynonymous SNV	VWA5B1:NM_001039500:exon22:c.G3610A:p.E1204K	0.2242	0.94	11.55	4.67	.
7:100677455:G:A	rs61075804	7	100677455	G	A	A	0.2144	1.098	0.94838	1.27252	MUC17	nonsynonymous SNV	MUC17:NM_001040105:exon3:c.G2758A:p.G920R	0.1194	0.389	0.002	-2.38	.
4:144621585:G:A	rs202139829	4	144621585	G	A	G	0.2149	1.24378	0.873052	1.77493	FREM3	nonsynonymous SNV	FREM3:NM_001168235:exon1:c.C244T:p.L82F	0.0144	.	23.8	2.89	.
7:100551799:A:G	rs200943429	7	100551799	A	G	G	0.2171	1.131	0.931425	1.37306	MUC3A	nonsynonymous SNV	MUC3A:NM_005960:exon4:c.A2380G:p.I794V	0.1043	0.001	0.001	-2.22	.
10:116008497:G:A	rs9664945	10	116008497	G	A	G	0.2179	1.0627	0.963676	1.17234	VWA2	nonsynonymous SNV	VWA2:NM_001272046:exon2:c.G25A:p.A9T,VWA2:NM_001320804:exon2:c.G25A:p.A9T	0.2225	0.001	7.662	3.07	.
13:24468329:A:G	rs4067961	13	24468329	A	G	A	0.218	1.06496	0.963715	1.17699	C1QTNF9B	nonsynonymous SNV	C1QTNF9B:NM_001007537:exon2:c.T178C:p.C60R	0.3202	0	6.566	3.83	.
14:94847415:A:G	rs6647	14	94847415	A	G	A	0.2182	1.06496	0.963715	1.17699	SERPINA1	nonsynonymous SNV	SERPINA1:NM_000295:exon3:c.T710C:p.V237A,SERPINA1:NM_001002235:exon3:c.T710C:p.V237A,SERPINA1:NM_001127700:exon3:c.T710C:p.V237A,SERPINA1:NM_001127702:exon4:c.T710C:p.V237A,SERPINA1:NM_001127706:exon4:c.T710C:p.V237A,SERPINA1:NM_001127707:exon4:c.T710C:p.V237A,SERPINA1:NM_001002236:exon5:c.T710C:p.V237A,SERPINA1:NM_001127701:exon5:c.T710C:p.V237A,SERPINA1:NM_001127703:exon5:c.T710C:p.V237A,SERPIN…	0.2146	0	0.001	-9.95	Serpin domain
2:242011084:T:C	rs17440466	2	242011084	T	C	C	0.2184	1.097	0.947432	1.27125	SNED1	nonsynonymous SNV	SNED1:NM_001080437:exon25:c.T3683C:p.L1228P	0.153	0.992	14.83	4.36	.
11:102584135:G:A	rs35231465	11	102584135	G	A	G	0.2184	1.19048	0.897412	1.57813	MMP8	stopgain	MMP8:NM_002424:exon10:c.C1348T:p.Q450X,MMP8:NM_001304441:exon11:c.C1279T:p.Q427X,MMP8:NM_001304442:exon11:c.C1279T:p.Q427X	0.0195	.	23.4	-2.53	Hemopexin-like domain
15:48058071:G:A	rs532598	15	48058071	G	A	A	0.2184	1.055	0.968274	1.15055	SEMA6D	nonsynonymous SNV	SEMA6D:NM_020858:exon14:c.G1433A:p.S478N,SEMA6D:NM_153616:exon14:c.G1433A:p.S478N,SEMA6D:NM_153617:exon14:c.G1433A:p.S478N,SEMA6D:NM_153618:exon14:c.G1433A:p.S478N,SEMA6D:NM_153619:exon14:c.G1433A:p.S478N,SEMA6D:NM_001198999:exon17:c.G1433A:p.S478N	0.3803	0	0.004	-1.93	Sema domain|WD40/YVTN repeat-like-containing domain
11:60638753:C:A	rs117566381	11	60638753	C	A	A	0.2187	1.244	0.884228	1.74899	ZP1	nonsynonymous SNV	ZP1:NM_207341:exon6:c.C1078A:p.P360T	0.0245	0.256	23	5.15	Zona pellucida domain
4:88732746:A:G	rs13144371	4	88732746	A	G	G	0.2197	1.063	0.963676	1.17234	IBSP	nonsynonymous SNV	IBSP:NM_004967:exon7:c.A638G:p.D213G	0.7597	0	1.196	2.57	.
9:136307825:C:T	rs41314453	9	136307825	C	T	C	0.2197	1.3947	0.807478	2.41051	ADAMTS13	nonsynonymous SNV	ADAMTS13:NM_139025:exon18:c.C2195T:p.A732V,ADAMTS13:NM_139026:exon18:c.C2102T:p.A701V,ADAMTS13:NM_139027:exon18:c.C2195T:p.A732V	0.0147	0.949	19.33	1.48	.
2:98928429:C:G	rs17428626	2	98928429	C	G	C	0.22	1.11483	0.934821	1.33029	VWA3B	nonsynonymous SNV	VWA3B:NM_001345864:exon21:c.C2640G:p.D880E,VWA3B:NM_144992:exon27:c.C3669G:p.D1223E	0.0637	0.27	12.43	-4.4	.
11:130281488:G:A	rs2131535	11	130281488	G	A	G	0.2201	1.05932	0.966456	1.16197	ADAMTS8	nonsynonymous SNV	ADAMTS8:NM_007037:exon6:c.C1574T:p.A525V	0.741	0	14.15	5.87	.
19:14703150:A:G	rs150637944	19	14703150	A	G	G	0.2213	1.264	0.87417	1.82664	CLEC17A	nonsynonymous SNV	CLEC17A:NM_001204118:exon4:c.A257G:p.K86R,CLEC17A:NM_207390:exon4:c.A257G:p.K86R	0.036	0.988	19.63	1.2	.
8:24199218:C:A	rs36041430	8	24199218	C	A	C	0.2216	1.16279	0.9085	1.48878	ADAM28	nonsynonymous SNV	ADAM28:NM_001304351:exon16:c.C1778A:p.T593K,ADAM28:NM_014265:exon16:c.C1778A:p.T593K	0.0214	0.005	0.005	-11.7	ADAM, cysteine-rich
11:102584104:T:G	rs35866072	11	102584104	T	G	G	0.2216	1.122	0.934933	1.34619	MMP8	nonsynonymous SNV	MMP8:NM_002424:exon10:c.A1379C:p.K460T,MMP8:NM_001304441:exon11:c.A1310C:p.K437T,MMP8:NM_001304442:exon11:c.A1310C:p.K437T	0.0506	0.004	0.03	-8	Hemopexin-like domain
11:9082068:G:A	rs72547298	11	9082068	G	A	A	0.2227	1.239	0.885042	1.73693	SCUBE2	nonsynonymous SNV	SCUBE2:NM_001170690:exon8:c.C854T:p.T285M,SCUBE2:NM_001330199:exon8:c.C854T:p.T285M,SCUBE2:NM_020974:exon8:c.C854T:p.T285M	0.0101	1	31	5.94	EGF-like domain|Growth factor receptor cysteine-rich domain
5:33535060:G:A	rs25754	5	33535060	G	A	A	0.2235	1.053	0.970135	1.14376	ADAMTS12	nonsynonymous SNV	ADAMTS12:NM_001324512:exon21:c.C4229T:p.T1410I,ADAMTS12:NM_030955:exon23:c.C4484T:p.T1495I	0.3852	0.129	24.2	4.1	.
10:105793750:T:C	rs17116350	10	105793750	T	C	C	0.2242	1.06	0.964563	1.16425	COL17A1	nonsynonymous SNV	COL17A1:NM_000494:exon52:c.A4109G:p.D1370G	0.2462	0	7.551	-0.367	.
18:6977844:A:G	rs671871	18	6977844	A	G	G	0.2245	1.067	0.961866	1.18398	LAMA1	nonsynonymous SNV	LAMA1:NM_005559:exon44:c.T6227C:p.I2076T	0.1658	0	14.48	2.15	Laminin domain II
17:48913390:G:A	rs55700534	17	48913390	G	A	G	0.2247	1.26422	0.856381	1.86832	WFIKKN2	nonsynonymous SNV	WFIKKN2:NM_175575:exon1:c.G92A:p.R31Q	0.0139	0	0.055	-3.06	.
3:52833881:C:T	rs35271262	3	52833881	C	T	C	0.2253	1.31234	0.839558	2.05213	ITIH3	nonsynonymous SNV	ITIH3:NM_002217:exon9:c.C1019T:p.T340M	0.0584	1	25.6	4.16	von Willebrand factor, type A
19:9088017:T:G	rs1596797	19	9088017	T	G	T	0.2256	1.05597	0.966378	1.15281	MUC16	nonsynonymous SNV	MUC16:NM_024690:exon1:c.A3798C:p.K1266N	0.721	0	0.138	-2.01	.
13:24465537:C:T	rs140860568	13	24465537	C	T	T	0.2258	1.317	0.850373	2.03823	C1QTNF9B	nonsynonymous SNV	C1QTNF9B:NM_001007537:exon3:c.G893A:p.G298E	0.0299	1	26.4	3.08	C1q domain|Tumour necrosis factor-like domain
1:120436751:T:C	rs35273427	1	120436751	T	C	T	0.2279	1.11607	0.931164	1.33552	ADAM30	nonsynonymous SNV	ADAM30:NM_021794:exon1:c.A2209G:p.T737A	0.0556	0.001	0.001	-1.93	.
14:73729498:G:A	rs177386	14	73729498	G	A	G	0.228	1.21507	0.878622	1.67766	PAPLN	nonsynonymous SNV	PAPLN:NM_173462:exon18:c.G2605A:p.G869R	0.0204	0.003	0.234	-3.04	.
2:183703336:G:A	rs288326	2	183703336	G	A	G	0.2281	1.08108	0.9518	1.22802	FRZB	nonsynonymous SNV	FRZB:NM_001463:exon4:c.C598T:p.R200W	0.1128	1	34	3.18	Netrin domain|Netrin module, non-TIMP type|Tissue inhibitor of metalloproteinases-like, OB-fold
1:183201970:G:C	rs2296303	1	183201970	G	C	G	0.2282	1.07759	0.952676	1.21955	LAMC2	nonsynonymous SNV	LAMC2:NM_005562:exon14:c.G2198C:p.S733T,LAMC2:NM_018891:exon14:c.G2198C:p.S733T	0.1328	0.104	11.25	1.73	.
9:21206916:T:A	rs28368145	9	21206916	T	A	A	0.2295	1.149	0.919027	1.43683	IFNA10	nonsynonymous SNV	IFNA10:NM_002171:exon1:c.A181T:p.I61F	0.0389	0	0.013	2.49	Four-helical cytokine, core|Four-helical cytokine-like, core
9:21206919:G:C	rs28368144	9	21206919	G	C	C	0.2295	1.149	0.919027	1.43683	IFNA10	nonsynonymous SNV	IFNA10:NM_002171:exon1:c.C178G:p.R60G	0.0389	0	0.003	-2.28	Four-helical cytokine, core|Four-helical cytokine-like, core
3:130282383:C:A	rs114511272	3	130282383	C	A	C	0.2313	1.22249	0.872738	1.71278	COL6A6	nonsynonymous SNV	COL6A6:NM_001102608:exon2:c.C536A:p.T179K	0.0159	1	34	5.3	von Willebrand factor, type A
8:11710174:T:C	rs1803250	8	11710174	T	C	T	0.2315	1.07991	0.950849	1.22679	CTSB	nonsynonymous SNV	CTSB:NM_001908:exon3:c.A157G:p.S53G,CTSB:NM_147781:exon4:c.A157G:p.S53G,CTSB:NM_147782:exon4:c.A157G:p.S53G,CTSB:NM_147783:exon4:c.A157G:p.S53G,CTSB:NM_147780:exon5:c.A157G:p.S53G	0.1305	0.06	14.71	5.85	Peptidase C1A, propeptide
7:149523277:A:G	rs1004200	7	149523277	A	G	G	0.2322	1.078	0.952676	1.21955	SSPO	nonsynonymous SNV	SSPO:NM_198455:exon101:c.A14360G:p.H4787R	0.3386	0.006	6.15	1.62	.
7:100551502:A:C	rs28515787	7	100551502	A	C	A	0.2326	1.12486	0.926779	1.36621	MUC3A	nonsynonymous SNV	MUC3A:NM_005960:exon4:c.A2083C:p.I695L	0.0738	.	0.033	-3.61	.
6:112382313:G:T	rs1230345	6	112382313	G	T	G	0.2328	1.05708	0.964525	1.15965	WISP3	nonsynonymous SNV	WISP3:NM_198239:exon2:c.G222T:p.Q74H,WISP3:NM_003880:exon3:c.G168T:p.Q56H	0.2685	0	0.005	-7.25	Growth factor receptor cysteine-rich domain|Insulin-like growth factor binding protein, N-terminal, Cys-rich conserved site|Insulin-like growth factor-binding protein, IGFBP;Growth factor receptor cysteine-rich domain|Insulin-like growth factor-binding protein, IGFBP
21:46876580:C:T	rs8133886	21	46876580	C	T	T	0.2336	1.062	0.962713	1.17117	COL18A1	nonsynonymous SNV	COL18A1:NM_130444:exon1:c.C1136T:p.T379M	0.2924	1	13.89	5.16	Frizzled domain
19:9070225:G:C	rs1559172	19	9070225	G	C	C	0.2357	1.072	0.955386	1.20399	MUC16	nonsynonymous SNV	MUC16:NM_024690:exon3:c.C17221G:p.H5741D	0.8314	0	0.017	-0.66	.
5:79363860:C:T	rs17882372	5	79363860	C	T	C	0.2359	1.23153	0.865195	1.75207	THBS4	nonsynonymous SNV	THBS4:NM_001306214:exon10:c.C986T:p.A329V,THBS4:NM_003248:exon10:c.C1259T:p.A420V,THBS4:NM_001306212:exon11:c.C986T:p.A329V,THBS4:NM_001306213:exon11:c.C986T:p.A329V	0.0137	0.023	8.375	0.017	EGF-like domain
1:152276149:C:T	rs77422831	1	152276149	C	T	C	0.2361	1.07991	0.949899	1.22556	FLG	nonsynonymous SNV	FLG:NM_002016:exon3:c.G11213A:p.R3738H	0.1269	0.751	10.76	-2.2	.
4:71346701:C:G	rs6826961	4	71346701	C	G	G	0.2362	1.059	0.963599	1.16309	MUC7	nonsynonymous SNV	MUC7:NM_152291:exon3:c.C240G:p.N80K,MUC7:NM_001145006:exon4:c.C240G:p.N80K,MUC7:NM_001145007:exon4:c.C240G:p.N80K	0.2564	0.006	0.001	-3.1	.
12:9243017:G:A	rs55761427	12	9243017	G	A	G	0.2364	1.17371	0.895404	1.538	A2M	nonsynonymous SNV	A2M:NM_001347425:exon19:c.C2081T:p.A694V,A2M:NM_000014:exon20:c.C2531T:p.A844V,A2M:NM_001347424:exon20:c.C2231T:p.A744V,A2M:NM_001347423:exon21:c.C2531T:p.A844V	0.0189	0.053	0.377	-7.37	Immunoglobulin E-set
4:79443837:A:T	rs931605	4	79443837	A	T	T	0.237	1.063	0.961789	1.17464	FRAS1	nonsynonymous SNV	FRAS1:NM_025074:exon69:c.A10683T:p.E3561D	0.1861	0.008	0.018	-1.1	.
4:175898743:TTTA:T	rs200852076	4	175898743	TTTA	T	TTTA	0.2373	1.31752	0.824944	2.10526	ADAM29	nonframeshift deletion	ADAM29:NM_001278127:exon2:c.2068_2070del:p.690_690del,ADAM29:NM_001130705:exon3:c.2068_2070del:p.690_690del,ADAM29:NM_001130703:exon4:c.2068_2070del:p.690_690del,ADAM29:NM_001130704:exon4:c.2068_2070del:p.690_690del,ADAM29:NM_014269:exon5:c.2068_2070del:p.690_690del,ADAM29:NM_001278125:exon6:c.2068_2070del:p.690_690del,ADAM29:NM_001278126:exon6:c.2068_2070del:p.690_690del	0.0395	.	.	.	.
19:14705574:T:C	rs78269670	19	14705574	T	C	C	0.2381	1.102	0.938268	1.29398	CLEC17A	nonsynonymous SNV	CLEC17A:NM_001204118:exon7:c.T365C:p.L122P,CLEC17A:NM_207390:exon7:c.T365C:p.L122P	0.0669	0.041	9.147	-0.168	.
17:1648502:C:T	rs2070863	17	1648502	C	T	C	0.239	1.07527	0.952638	1.21473	SERPINF2	nonsynonymous SNV	SERPINF2:NM_000934:exon3:c.C97T:p.R33W,SERPINF2:NM_001165920:exon3:c.C97T:p.R33W,SERPINF2:NM_001165921:exon3:c.C97T:p.R33W	0.2209	0.97	17.64	2.96	Serpin domain
14:94844843:T:G	rs1303	14	94844843	T	G	G	0.2398	1.057	0.964525	1.15965	SERPINA1	nonsynonymous SNV	SERPINA1:NM_000295:exon5:c.A1200C:p.E400D,SERPINA1:NM_001002235:exon5:c.A1200C:p.E400D,SERPINA1:NM_001127700:exon5:c.A1200C:p.E400D,SERPINA1:NM_001127702:exon6:c.A1200C:p.E400D,SERPINA1:NM_001127706:exon6:c.A1200C:p.E400D,SERPINA1:NM_001127707:exon6:c.A1200C:p.E400D,SERPINA1:NM_001002236:exon7:c.A1200C:p.E400D,SERPINA1:NM_001127701:exon7:c.A1200C:p.E400D,SERPINA1:NM_001127703:exon7:c.A1200C:p.E40…	0.2435	0	0.001	-9.02	Serpin domain
8:52258429:A:T	rs11774588	8	52258429	A	T	A	0.2404	1.25	0.852826	1.83162	PXDNL	nonsynonymous SNV	PXDNL:NM_144651:exon20:c.T3980A:p.V1327D	0.0108	0	0.733	0.082	.
19:40196627:G:A	rs72480733	19	40196627	G	A	A	0.2404	1.117	0.93027	1.33948	LGALS14	nonsynonymous SNV	LGALS14:NM_203471:exon2:c.G80A:p.R27H	0.0441	0.975	15.67	-0.44	Concanavalin A-like lectin/glucanase domain|Galectin, carbohydrate recognition domain
1:152276626:G:C	rs3126075	1	152276626	G	C	G	0.2414	1.07759	0.949861	1.22072	FLG	nonsynonymous SNV	FLG:NM_002016:exon3:c.C10736G:p.T3579R	0.0583	0.01	0.16	-2.52	.
1:15808872:G:A	rs3766160	1	15808872	G	A	G	0.2415	1.0582	0.961712	1.16537	CELA2B	nonsynonymous SNV	CELA2B:NM_015849:exon4:c.G340A:p.D114N	0.2609	0	0.076	0.469	Peptidase S1, PA clan|Serine proteases, trypsin domain
1:15808767:G:A	rs3820071	1	15808767	G	A	G	0.2416	1.0582	0.961712	1.16537	CELA2B	nonsynonymous SNV	CELA2B:NM_015849:exon4:c.G235A:p.G79R	0.2616	0	0.001	-6.17	Peptidase S1, PA clan|Serine proteases, trypsin domain
11:102567207:T:A	rs1276286	11	102567207	T	A	A	0.2421	1.051	0.967229	1.14033	MMP27	nonsynonymous SNV	MMP27:NM_022122:exon6:c.A797T:p.E266V	0.4565	0	0.068	-1.3	.
6:116441646:C:G	rs2228547	6	116441646	C	G	C	0.2423	1.08108	0.948077	1.23284	COL10A1	nonsynonymous SNV	COL10A1:NM_000493:exon3:c.G1633C:p.G545R	0.129	0.966	23.8	4.8	C1q domain
11:88027209:T:C	rs3888798	11	88027209	T	C	C	0.2423	1.126	0.92589	1.37026	CTSC	nonsynonymous SNV	CTSC:NM_001814:exon7:c.A1357G:p.I453V	0.0452	0.687	23.6	5.97	Peptidase C1A, papain C-terminal
11:130066261:C:A	rs17667603	11	130066261	C	A	C	0.2423	1.10619	0.931909	1.31065	ST14	nonsynonymous SNV	ST14:NM_021978:exon10:c.C1141A:p.R381S	0.0752	0.049	19.36	1.44	CUB domain
9:116832007:T:C	rs141738059	9	116832007	T	C	C	0.2429	1.245	0.869636	1.7819	AMBP	nonsynonymous SNV	AMBP:NM_001633:exon6:c.A575G:p.E192G	0.0137	0.877	24.8	5.21	Calycin;Calycin|Calycin-like
5:33751454:A:T	rs1530507	5	33751454	A	T	T	0.2452	1.06	0.959868	1.17229	ADAMTS12	stopgain	ADAMTS12:NM_001324511:exon3:c.T689A:p.L230X	0.7304	.	2.152	1.06	.
1:150482145:G:A	rs145971597	1	150482145	G	A	G	0.2458	1.29032	0.827853	2.01561	ECM1	nonsynonymous SNV	ECM1:NM_001202858:exon3:c.G130A:p.A44T,ECM1:NM_004425:exon3:c.G130A:p.A44T,ECM1:NM_022664:exon3:c.G130A:p.A44T	0.018	1	31	4.32	.
6:30993866:A:T	rs62399430	6	30993866	A	T	T	0.246	1.073	0.953515	1.20635	MUC22	nonsynonymous SNV	MUC22:NM_001198815:exon3:c.A658T:p.T220S,MUC22:NM_001318484:exon3:c.A667T:p.T223S,MUC22:NM_001322469:exon3:c.A667T:p.T223S	0.1488	.	0.021	-4.98	.
6:129571330:G:A	rs3816665	6	129571330	G	A	G	0.2463	1.07296	0.951648	1.20872	LAMA2	nonsynonymous SNV	LAMA2:NM_000426:exon13:c.G1856A:p.R619H,LAMA2:NM_001079823:exon13:c.G1856A:p.R619H	0.1374	0.004	0.771	-5.14	Laminin IV
18:61587053:G:A	rs17072146	18	61587053	G	A	A	0.2463	1.203	0.886247	1.63356	SERPINB10	nonsynonymous SNV	SERPINB10:NM_005024:exon5:c.G404A:p.G135D	0.0183	0.235	14	3.43	Serpin domain
6:64694354:C:T	rs4710457	6	64694354	C	T	T	0.2464	1.051	0.966301	1.14371	EYS	nonsynonymous SNV	EYS:NM_001142800:exon35:c.G6977A:p.R2326Q,EYS:NM_001292009:exon35:c.G6977A:p.R2326Q	0.3577	0.01	13.59	0.33	Concanavalin A-like lectin/glucanase domain|Laminin G domain
16:22144318:C:T	rs1105929	16	22144318	C	T	C	0.2467	1.05597	0.961674	1.16077	VWA3A	nonsynonymous SNV	VWA3A:NM_173615:exon20:c.C1970T:p.T657I	0.2778	0.002	0.024	-5.8	von Willebrand factor, type A
7:149515188:TA:T	rs60594151	7	149515188	TA	T	T	0.2477	1.079	0.948039	1.22797	SSPO	.	.	0.3296	.	.	.	.
1:152186099:C:T	rs144801487	1	152186099	C	T	C	0.2479	1.12994	0.916934	1.39476	HRNR	nonsynonymous SNV	HRNR:NM_001009931:exon3:c.G8006A:p.G2669D	0.0585	0.022	5.559	0.185	.
4:88536362:G:A	rs116385272	4	88536362	G	A	A	0.2481	1.051	0.966301	1.14371	DSPP	nonsynonymous SNV	DSPP:NM_014208:exon5:c.G2548A:p.G850S	0.5805	0.003	11.75	0.918	.
7:100678086:T:C	rs4729647	7	100678086	T	C	C	0.2482	1.102	0.932767	1.30161	MUC17	nonsynonymous SNV	MUC17:NM_001040105:exon3:c.T3389C:p.I1130T	0.8788	0	0.012	-0.081	.
7:100644303:G:A	rs144363228	7	100644303	G	A	A	0.249	1.121	0.92489	1.35809	MUC12	nonsynonymous SNV	MUC12:NM_001164462:exon2:c.G10459A:p.V3487I	0.0576	.	0.148	-0.8	.
1:152192555:T:C	rs41266134	1	152192555	T	C	T	0.2492	1.07759	0.948949	1.22434	HRNR	nonsynonymous SNV	HRNR:NM_001009931:exon3:c.A1550G:p.Y517C	0.1262	0.003	0.002	-6.02	.
9:21187311:C:T	rs1062571	9	21187311	C	T	C	0.2495	1.05263	0.965374	1.1471	IFNA4	nonsynonymous SNV	IFNA4:NM_021068:exon1:c.G220A:p.A74T	0.5669	0.001	6.484	1.06	Four-helical cytokine, core|Four-helical cytokine-like, core
4:88537063:A:C	rs142295724	4	88537063	A	C	C	0.2497	1.051	0.966301	1.14371	DSPP	nonsynonymous SNV	DSPP:NM_014208:exon5:c.A3249C:p.E1083D	0.5662	0	6.281	0.504	.
4:119203221:C:T	rs17594503	4	119203221	C	T	T	0.2499	1.099	0.936393	1.29139	PRSS12	nonsynonymous SNV	PRSS12:NM_003619:exon13:c.G2498A:p.R833Q	0.0658	0.999	32	5.32	Peptidase S1, PA clan|Serine proteases, trypsin domain
4:110901198:G:A	rs2237051	4	110901198	G	A	A	0.2505	1.05	0.965335	1.14257	EGF	nonsynonymous SNV	EGF:NM_001178131:exon13:c.G1998A:p.M666I,EGF:NM_001178130:exon14:c.G2124A:p.M708I,EGF:NM_001963:exon14:c.G2124A:p.M708I	0.3888	0	6.634	1.54	Six-bladed beta-propeller, TolB-like
1:22181360:G:C	rs116788687	1	22181360	G	C	C	0.2529	1.18	0.892865	1.55787	HSPG2	nonsynonymous SNV	HSPG2:NM_001291860:exon48:c.C6117G:p.I2039M,HSPG2:NM_005529:exon48:c.C6114G:p.I2038M	0.0243	0.136	22.8	0.062	Immunoglobulin I-set|Immunoglobulin-like domain|Immunoglobulin-like fold
7:7514235:C:G	rs6952195	7	7514235	C	G	C	0.253	1.06045	0.958908	1.17112	COL28A1	nonsynonymous SNV	COL28A1:NM_001037763:exon15:c.G1299C:p.E433D	0.2086	0	10.15	2.82	.
12:48398080:T:A	rs3803183	12	48398080	T	A	T	0.253	1.0661	0.955271	1.18977	COL2A1	nonsynonymous SNV	COL2A1:NM_001844:exon1:c.A25T:p.T9S,COL2A1:NM_033150:exon1:c.A25T:p.T9S	0.8267	0	16.71	2.88	.
6:30994412:G:A	rs6928386	6	30994412	G	A	G	0.2535	1.14811	0.902055	1.46094	MUC22	nonsynonymous SNV	MUC22:NM_001198815:exon3:c.G1204A:p.V402M,MUC22:NM_001318484:exon3:c.G1213A:p.V405M,MUC22:NM_001322469:exon3:c.G1213A:p.V405M	0.0337	.	0.025	-0.79	.
9:21481556:T:G	rs1125488	9	21481556	T	G	T	0.2538	1.0989	0.933625	1.29263	IFNE	nonsynonymous SNV	IFNE:NM_176891:exon1:c.A138C:p.Q46H	0.0718	0.071	1.116	-8.88	Four-helical cytokine, core|Four-helical cytokine-like, core
4:79434685:T:G	rs35933858	4	79434685	T	G	G	0.2551	1.06	0.959868	1.17229	FRAS1	nonsynonymous SNV	FRAS1:NM_025074:exon65:c.T10153G:p.Y3385D	0.1858	0.033	12.08	3.58	.
6:56033094:G:A	rs35471617	6	56033094	G	A	A	0.2554	1.094	0.937217	1.27742	COL21A1	nonsynonymous SNV	COL21A1:NM_001318752:exon6:c.C1028T:p.T343M,COL21A1:NM_030820:exon6:c.C1028T:p.T343M,COL21A1:NM_001318751:exon7:c.C1028T:p.T343M	0.0718	0.999	13.75	2.41	Concanavalin A-like lectin/glucanase domain|Laminin G domain
3:167512569:G:A	rs55872908	3	167512569	G	A	G	0.256	1.21065	0.864054	1.69574	SERPINI1	nonsynonymous SNV	SERPINI1:NM_001122752:exon5:c.G838A:p.A280T,SERPINI1:NM_005025:exon5:c.G838A:p.A280T	0.0157	0.094	11.4	5.68	Serpin domain
9:21216908:C:G	rs28368163	9	21216908	C	G	G	0.2566	1.14	0.911704	1.42538	IFNA16	nonsynonymous SNV	IFNA16:NM_002173:exon1:c.G397C:p.A133P	0.0386	0	0.002	-1.9	Four-helical cytokine, core|Four-helical cytokine-like, core
9:21216910:A:G	rs28368162	9	21216910	A	G	G	0.2566	1.14	0.911704	1.42538	IFNA16	nonsynonymous SNV	IFNA16:NM_002173:exon1:c.T395C:p.I132T	0.0386	0	0.002	-0.859	Four-helical cytokine, core|Four-helical cytokine-like, core
9:21216934:G:A	rs28368161	9	21216934	G	A	A	0.2566	1.14	0.911704	1.42538	IFNA16	nonsynonymous SNV	IFNA16:NM_002173:exon1:c.C371T:p.T124I	0.0385	0	0.034	-5.24	Four-helical cytokine, core|Four-helical cytokine-like, core
9:21217022:C:G	rs28368160	9	21217022	C	G	G	0.2566	1.14	0.911704	1.42538	IFNA16	nonsynonymous SNV	IFNA16:NM_002173:exon1:c.G283C:p.D95H	0.039	0.903	13.16	-0.618	Four-helical cytokine, core|Four-helical cytokine-like, core
9:21217111:A:T	rs28368159	9	21217111	A	T	T	0.2566	1.14	0.911704	1.42538	IFNA16	nonsynonymous SNV	IFNA16:NM_002173:exon1:c.T194A:p.V65E	0.0389	0	0.001	-5.24	Four-helical cytokine, core|Four-helical cytokine-like, core
15:100514614:T:C	rs2573652	15	100514614	T	C	T	0.2567	1.06383	0.957107	1.18275	ADAMTS17	nonsynonymous SNV	ADAMTS17:NM_139057:exon22:c.A3281G:p.N1094S	0.6681	0	0.037	4.09	.
20:6750882:T:G	rs2273073	20	6750882	T	G	T	0.2567	1.34771	0.795138	2.28243	BMP2	nonsynonymous SNV	BMP2:NM_001200:exon2:c.T109G:p.S37A	0.0174	0	0.001	-10.3	.
19:18717389:GAGC:G	rs137853925	19	18717389	GAGC	G	GAGC	0.2572	1.10132	0.93094	1.30416	CRLF1	nonframeshift deletion	CRLF1:NM_004750:exon1:c.75_77del:p.25_26del	0.2013	.	.	.	.
4:79284694:C:T	rs6835769	4	79284694	C	T	T	0.2575	1.049	0.966262	1.13919	FRAS1	nonsynonymous SNV	FRAS1:NM_001166133:exon21:c.C2450T:p.A817V,FRAS1:NM_025074:exon21:c.C2450T:p.A817V	0.5607	0	2.178	0.556	EGF-like domain|Growth factor receptor cysteine-rich domain;Growth factor receptor cysteine-rich domain
1:152277826:A:C	rs2065957	1	152277826	A	C	A	0.2576	1.0929	0.935345	1.27486	FLG	nonsynonymous SNV	FLG:NM_002016:exon3:c.T9536G:p.V3179G	0.1179	0	0.002	1.39	.
18:7034508:T:G	rs566655	18	7034508	T	G	G	0.2576	1.057	0.959791	1.16304	LAMA1	nonsynonymous SNV	LAMA1:NM_005559:exon14:c.A2021C:p.N674T	0.2132	0.751	14.64	4.75	Laminin IV
13:110818598:T:G	rs3742207	13	110818598	T	G	G	0.2594	1.051	0.963445	1.14481	COL4A1	nonsynonymous SNV	COL4A1:NM_001845:exon45:c.A4002C:p.Q1334H	0.3419	0.264	8.7	-1.19	.
9:113192655:T:G	rs2986671	9	113192655	T	G	G	0.2596	1.063	0.95615	1.18157	SVEP1	nonsynonymous SNV	SVEP1:NM_153366:exon33:c.A5429C:p.E1810A	0.1772	0.004	14.71	2.82	Sushi/SCR/CCP domain
15:84539619:C:G	rs4144691	15	84539619	C	G	C	0.2597	1.06045	0.957031	1.17342	ADAMTSL3	nonsynonymous SNV	ADAMTSL3:NM_001301110:exon9:c.C868G:p.L290V,ADAMTSL3:NM_207517:exon9:c.C868G:p.L290V	0.7935	0	0.001	1.68	.
22:37581383:C:T	rs7290488	22	37581383	C	T	C	0.2598	1.07759	0.945237	1.22915	C1QTNF6	nonsynonymous SNV	C1QTNF6:NM_031910:exon2:c.G164A:p.G55D,C1QTNF6:NM_182486:exon2:c.G164A:p.G55D	0.1712	0.529	12.1	1.05	.
1:152190945:C:T	rs77376932	1	152190945	C	T	C	0.26	1.07759	0.946144	1.22551	HRNR	nonsynonymous SNV	HRNR:NM_001009931:exon3:c.G3160A:p.E1054K	0.1249	0.588	10.08	1.39	.
9:137779091:G:T	rs7851696	9	137779091	G	T	T	0.26	1.076	0.947053	1.22189	FCN2	nonsynonymous SNV	FCN2:NM_015837:exon7:c.G658T:p.A220S,FCN2:NM_004108:exon8:c.G772T:p.A258S	0.1161	0.946	24.2	4.05	Fibrinogen, alpha/beta/gamma chain, C-terminal globular domain|Fibrinogen, alpha/beta/gamma chain, C-terminal globular, subdomain 1;Fibrinogen, alpha/beta/gamma chain, C-terminal globular domain|Fibrinogen, alpha/beta/gamma chain, C-terminal globular, subdomain 2
10:72518009:A:G	rs4747096	10	72518009	A	G	A	0.2616	1.0661	0.952448	1.19091	ADAMTS14	nonsynonymous SNV	ADAMTS14:NM_080722:exon21:c.A3146G:p.E1049G,ADAMTS14:NM_139155:exon21:c.A3155G:p.E1052G	0.1813	0	5.798	2.98	.
6:159670100:A:G	rs7763726	6	159670100	A	G	A	0.2627	1.12867	0.911522	1.39744	FNDC1	nonsynonymous SNV	FNDC1:NM_032532:exon16:c.A4720G:p.T1574A	0.0331	0.15	8.1	-3.14	.
3:151163838:T:C	rs34114908	3	151163838	T	C	T	0.2641	1.20627	0.862293	1.68566	IGSF10	nonsynonymous SNV	IGSF10:NM_178822:exon4:c.A3931G:p.I1311V	0.0167	0.028	0.002	-0.901	.
6:66044927:T:C	rs61753610	6	66044927	T	C	C	0.2649	1.062	0.955195	1.18038	EYS	nonsynonymous SNV	EYS:NM_198283:exon10:c.A1712G:p.Q571R,EYS:NM_001142800:exon11:c.A1712G:p.Q571R,EYS:NM_001142801:exon11:c.A1712G:p.Q571R,EYS:NM_001292009:exon11:c.A1712G:p.Q571R	0.1748	0.218	0.013	2.23	EGF-like domain
7:7495735:T:C	rs55745506	7	7495735	T	C	T	0.2651	1.0582	0.95795	1.16995	COL28A1	nonsynonymous SNV	COL28A1:NM_001037763:exon16:c.A1311G:p.I437M	0.2089	0	11.04	1.44	.
6:129807629:C:T	rs2229848	6	129807629	C	T	C	0.2653	1.05263	0.962559	1.15276	LAMA2	nonsynonymous SNV	LAMA2:NM_001079823:exon55:c.C7748T:p.A2583V,LAMA2:NM_000426:exon56:c.C7760T:p.A2587V	0.7152	0.998	34	5.6	Concanavalin A-like lectin/glucanase domain|Laminin G domain
9:78937974:C:T	rs3001772	9	78937974	C	T	C	0.2662	1.04712	0.966224	1.13469	PCSK5	nonsynonymous SNV	PCSK5:NM_001190482:exon31:c.C4028T:p.T1343M	0.5412	.	23.4	5.65	Growth factor receptor cysteine-rich domain
19:8961981:C:G	rs1035442	19	8961981	C	G	G	0.2663	1.095	0.931723	1.28495	MUC16	nonsynonymous SNV	MUC16:NM_024690:exon83:c.G43396C:p.V14466L	0.9268	0	1.593	-0.191	.
9:21207005:C:G	rs10113876	9	21207005	C	G	C	0.2669	1.06157	0.95424	1.1792	IFNA10	nonsynonymous SNV	IFNA10:NM_002171:exon1:c.G92C:p.S31T	0.2156	0.095	0.025	-1.15	Four-helical cytokine, core|Four-helical cytokine-like, core
10:100020880:C:T	rs33995374	10	100020880	C	T	C	0.2669	1.08696	0.936168	1.26107	LOXL4	nonsynonymous SNV	LOXL4:NM_032211:exon4:c.G461A:p.R154Q	0.141	0.007	10.64	-3.54	.
2:98779439:G:T	rs62154921	2	98779439	G	T	G	0.2671	1.11607	0.917594	1.35798	VWA3B	stopgain	VWA3B:NM_001345864:exon2:c.G85T:p.E29X,VWA3B:NM_144992:exon8:c.G1114T:p.E372X	0.0508	.	36	2.86	.
6:6251120:T:A	rs3024477	6	6251120	T	A	A	0.2674	1.19	0.879994	1.60937	F13A1	nonsynonymous SNV	F13A1:NM_000129:exon5:c.A614T:p.Y205F	0.03	0.997	23.1	4.74	Transglutaminase-like
8:17749317:C:G	rs35522859	8	17749317	C	G	G	0.2683	1.109	0.924705	1.33147	FGL1	.	.	0.0541	.	.	.	.
14:94756794:T:C	rs941590	14	94756794	T	C	T	0.2685	1.04932	0.96437	1.14143	SERPINA10	nonsynonymous SNV	SERPINA10:NM_001100607:exon2:c.A137G:p.K46R,SERPINA10:NM_016186:exon2:c.A137G:p.K46R	0.3894	0	0.008	-0.49	.
17:34340284:C:T	rs1003645	17	34340284	C	T	T	0.2687	1.061	0.95424	1.1792	CCL23	nonsynonymous SNV	CCL23:NM_005064:exon4:c.G367A:p.V123M,CCL23:NM_145898:exon4:c.G316A:p.V106M	0.8042	.	.	.	.
3:195511390:T:G	rs75692609	3	195511390	T	G	G	0.2689	1.192	0.878306	1.61892	MUC4	nonsynonymous SNV	MUC4:NM_018406:exon2:c.A7061C:p.H2354P	0.1736	0.003	0.01	.	.
3:195516730:G:A	rs74547899	3	195516730	G	A	A	0.2695	1.176	0.886708	1.5593	MUC4	nonsynonymous SNV	MUC4:NM_018406:exon2:c.C1721T:p.T574I	0.0344	0.215	0.582	0.03	.
1:208390469:C:T	rs3748735	1	208390469	C	T	T	0.27	1.059	0.956074	1.17224	PLXNA2	nonsynonymous SNV	PLXNA2:NM_025179:exon2:c.G799A:p.A267T	0.1827	0.649	19.21	4.91	Sema domain|WD40/YVTN repeat-like-containing domain
1:22150120:C:T	rs3736360	1	22150120	C	T	C	0.2702	1.06157	0.953324	1.1827	HSPG2	nonsynonymous SNV	HSPG2:NM_001291860:exon96:c.G12995A:p.S4332N,HSPG2:NM_005529:exon96:c.G12992A:p.S4331N	0.1757	0.001	13.76	2.03	Concanavalin A-like lectin/glucanase domain|Laminin G domain
3:100963154:G:A	rs571391	3	100963154	G	A	A	0.2717	1.049	0.962482	1.14367	IMPG2	nonsynonymous SNV	IMPG2:NM_016247:exon13:c.C2021T:p.T674I	0.666	0.002	0.875	1.69	.
3:186460110:G:C	rs5030087	3	186460110	G	C	G	0.2718	1.14025	0.899281	1.44507	KNG1	nonsynonymous SNV	KNG1:NM_001102416:exon10:c.G1925C:p.G642A	0.0335	0	0.015	4.4	.
1:152084984:C:G	rs3134814	1	152084984	C	G	G	0.2721	1.163	0.890867	1.51825	TCHH	nonsynonymous SNV	TCHH:NM_007113:exon3:c.G709C:p.V237L	0.0344	0.01	8.534	0.891	.
4:1165130:G:T	rs11247975	4	1165130	G	T	G	0.2721	1.05708	0.956992	1.16878	SPON2	nonsynonymous SNV	SPON2:NM_012445:exon3:c.C365A:p.A122E,SPON2:NM_001128325:exon4:c.C365A:p.A122E,SPON2:NM_001199021:exon5:c.C365A:p.A122E	0.6851	0.009	3.74	-8.23	Spondin, N-terminal
4:1164277:C:G	rs2279279	4	1164277	C	G	C	0.2729	1.05708	0.956992	1.16878	SPON2	nonsynonymous SNV	SPON2:NM_012445:exon5:c.G724C:p.V242L,SPON2:NM_001128325:exon6:c.G724C:p.V242L,SPON2:NM_001199021:exon7:c.G724C:p.V242L	0.6858	0.27	16.42	3.83	.
16:77353973:G:T	rs9930984	16	77353973	G	T	G	0.2735	1.04822	0.963406	1.14029	ADAMTS18	nonsynonymous SNV	ADAMTS18:NM_001326358:exon16:c.C1789A:p.L597I,ADAMTS18:NM_199355:exon16:c.C2305A:p.L769I	0.4066	0.001	1.426	2.08	ADAM-TS Spacer 1
14:25043671:T:C	rs45567233	14	25043671	T	C	T	0.2742	1.0989	0.925446	1.30667	CTSG	nonsynonymous SNV	CTSG:NM_001911:exon4:c.A374G:p.N125S	0.0679	0	0.002	0.133	Peptidase S1, PA clan|Serine proteases, trypsin domain
6:52101844:T:C	rs2397084	6	52101844	T	C	C	0.2747	1.084	0.938868	1.24992	IL17F	nonsynonymous SNV	IL17F:NM_052872:exon3:c.A377G:p.E126G	0.0903	1	28.2	5.72	Cystine-knot cytokine
8:23167353:T:G	rs1063582	8	23167353	T	G	G	0.2748	1.056	0.957911	1.16532	LOXL2	nonsynonymous SNV	LOXL2:NM_002318:exon10:c.A1708C:p.M570L	0.7848	0	11.41	-0.169	.
9:21217166:T:C	rs28368158	9	21217166	T	C	C	0.2768	1.135	0.906286	1.42248	IFNA16	nonsynonymous SNV	IFNA16:NM_002173:exon1:c.A139G:p.I47V	0.0387	0.001	0.001	-5.24	Four-helical cytokine, core|Four-helical cytokine-like, core
12:40931655:G:A	rs76684015	12	40931655	G	A	A	0.277	1.067	0.948759	1.20033	MUC19	.	.	0.1778	.	.	.	.
16:77328990:C:A	rs12935394	16	77328990	C	A	C	0.2783	1.06952	0.946031	1.21104	ADAMTS18	nonsynonymous SNV	ADAMTS18:NM_001326358:exon19:c.G2320T:p.A774S,ADAMTS18:NM_199355:exon19:c.G2836T:p.A946S	0.1267	0	11.84	3.28	.
6:54191686:C:T	rs41276062	6	54191686	C	T	T	0.2791	1.073	0.945161	1.21945	TINAG	nonsynonymous SNV	TINAG:NM_014464:exon4:c.C596T:p.P199L	0.099	0.993	19.71	5.82	.
3:195510900:G:T	rs201192572	3	195510900	G	T	G	0.2792	1.10132	0.92367	1.31443	MUC4	nonsynonymous SNV	MUC4:NM_018406:exon2:c.C7551A:p.D2517E	0.0903	0.034	1.269	.	.
9:113209195:T:G	rs1889323	9	113209195	T	G	G	0.28	1.061	0.953324	1.1827	SVEP1	nonsynonymous SNV	SVEP1:NM_153366:exon25:c.A4246C:p.K1416Q	0.1701	0.014	17.1	4.8	EGF-like calcium-binding domain|EGF-like domain|EGF-like, conserved site|Growth factor receptor cysteine-rich domain
15:75970070:C:T	rs8023621	15	75970070	C	T	C	0.28	1.05042	0.961558	1.14706	CSPG4	nonsynonymous SNV	CSPG4:NM_001897:exon9:c.G5108A:p.R1703H	0.3868	0.002	22.8	3.09	.
12:94613898:G:A	rs115651556	12	94613898	G	A	G	0.2805	1.36426	0.762525	2.44274	PLXNC1	nonsynonymous SNV	PLXNC1:NM_005761:exon6:c.G1661A:p.R554Q	0.0149	0	0.473	-5.13	.
10:72517830:G:A	rs10999516	10	72517830	G	A	G	0.2809	1.06383	0.950545	1.18853	ADAMTS14	nonsynonymous SNV	ADAMTS14:NM_080722:exon20:c.G3050A:p.S1017N,ADAMTS14:NM_139155:exon20:c.G3059A:p.S1020N	0.1807	0.019	20.8	3.39	.
20:23731494:A:G	rs6076122	20	23731494	A	G	G	0.281	1.051	0.959676	1.14931	CST1	nonsynonymous SNV	CST1:NM_001898:exon1:c.T10C:p.Y4H	0.6819	0.004	0.101	0.348	.
13:24895805:G:A	rs4589405	13	24895805	G	A	A	0.2831	1.139	0.900144	1.4408	C1QTNF9	nonsynonymous SNV	C1QTNF9:NM_001303138:exon4:c.G901A:p.V301M,C1QTNF9:NM_178540:exon4:c.G901A:p.V301M,C1QTNF9:NM_001303137:exon5:c.G901A:p.V301M	0.0693	1	28.2	3.96	C1q domain|Tumour necrosis factor-like domain
6:160952816:T:C	rs41267807	6	160952816	T	C	T	0.2833	1.19474	0.856244	1.66729	LPA	nonsynonymous SNV	LPA:NM_005577:exon40:c.A6068G:p.Y2023C	0.0146	1	23.7	2.87	Kringle|Kringle, conserved site|Kringle-like fold
1:152190722:T:C	rs202063542	1	152190722	T	C	C	0.2837	1.303	0.811136	2.09451	HRNR	nonsynonymous SNV	HRNR:NM_001009931:exon3:c.A3383G:p.H1128R	0.0145	0	0.001	-3.7	.
1:152190726:C:T	rs201574853	1	152190726	C	T	T	0.2837	1.303	0.811136	2.09451	HRNR	nonsynonymous SNV	HRNR:NM_001009931:exon3:c.G3379A:p.G1127S	0.0149	0.004	0.448	-3.8	.
12:51737607:G:A	rs17860299	12	51737607	G	A	A	0.284	1.072	0.944216	1.21823	CELA1	nonsynonymous SNV	CELA1:NM_001971:exon3:c.C130T:p.R44W	0.111	0	22.4	4.89	Peptidase S1, PA clan|Serine proteases, trypsin domain
6:33141280:G:A	rs2855430	6	33141280	G	A	G	0.2855	1.06838	0.945993	1.20625	COL11A2	nonsynonymous SNV	COL11A2:NM_080679:exon33:c.C2360T:p.P787L,COL11A2:NM_080681:exon34:c.C2423T:p.P808L,COL11A2:NM_080680:exon36:c.C2681T:p.P894L	0.1385	0.993	27.3	4.02	.
19:17932138:T:C	rs6523	19	17932138	T	C	T	0.2861	1.07411	0.942405	1.22546	INSL3	nonsynonymous SNV	INSL3:NM_001265587:exon1:c.A178G:p.T60A,INSL3:NM_005543:exon1:c.A178G:p.T60A	0.6496	0	0.002	1.21	Insulin-like
6:161152240:G:A	rs4252125	6	161152240	G	A	A	0.2864	1.05	0.961558	1.14706	PLG	nonsynonymous SNV	PLG:NM_000301:exon11:c.G1414A:p.D472N	0.2837	0	0.104	2.08	Kringle-like fold
9:116930100:G:A	rs2567707	9	116930100	G	A	A	0.287	1.053	0.957835	1.15613	COL27A1	nonsynonymous SNV	COL27A1:NM_032888:exon3:c.G265A:p.V89I	0.2238	0.066	0.034	0.882	Concanavalin A-like lectin/glucanase domain|Laminin G domain
17:34432664:T:A	rs1719152	17	34432664	T	A	T	0.2871	1.0582	0.953248	1.17337	CCL4	nonsynonymous SNV	CCL4:NM_002984:exon3:c.T238A:p.S80T	0.2355	0	0.001	-10.1	Chemokine interleukin-8-like domain
18:61600384:C:T	rs963075	18	61600384	C	T	T	0.2883	1.051	0.958755	1.15271	SERPINB10	nonsynonymous SNV	SERPINB10:NM_005024:exon7:c.C736T:p.R246C	0.275	0.068	22.5	0.68	Serpin domain
6:32063681:C:T	rs17201602	6	32063681	C	T	T	0.2884	1.108	0.918365	1.33798	TNXB	nonsynonymous SNV	TNXB:NM_019105:exon3:c.G1949A:p.R650H	0.0432	1	24	4.25	.
1:209803199:A:G	rs52814161	1	209803199	A	G	G	0.2887	1.19	0.868003	1.6316	LAMB3	nonsynonymous SNV	LAMB3:NM_001017402:exon9:c.T1015C:p.Y339H,LAMB3:NM_000228:exon10:c.T1015C:p.Y339H,LAMB3:NM_001127641:exon10:c.T1015C:p.Y339H	0.0159	0	7.697	0.916	Laminin EGF domain
1:236176845:C:T	rs35714220	1	236176845	C	T	T	0.2887	1.183	0.873017	1.60288	NID1	nonsynonymous SNV	NID1:NM_002508:exon11:c.G2270A:p.R757H	0.014	0.11	24.5	5.02	Growth factor receptor cysteine-rich domain
13:24890157:C:T	rs1974332	13	24890157	C	T	C	0.2887	1.07991	0.936056	1.24618	C1QTNF9	nonsynonymous SNV	C1QTNF9:NM_001303138:exon2:c.C16T:p.L6F,C1QTNF9:NM_178540:exon2:c.C16T:p.L6F,C1QTNF9:NM_001303137:exon3:c.C16T:p.L6F	0.1464	0.062	13.54	0.772	.
4:88536692:A:G	rs145771385	4	88536692	A	G	G	0.2895	1.047	0.962443	1.13915	DSPP	nonsynonymous SNV	DSPP:NM_014208:exon5:c.A2878G:p.S960G	0.5451	0.002	4.99	0.392	.
7:76828953:C:T	rs2075761	7	76828953	C	T	C	0.2902	1.07991	0.936056	1.24618	FGL2	nonsynonymous SNV	FGL2:NM_006682:exon1:c.G158A:p.G53E	0.0882	0.001	0.929	3.45	.
1:39976930:C:T	rs201515760	1	39976930	C	T	C	0.291	1.13636	0.893079	1.4464	BMP8A	nonsynonymous SNV	BMP8A:NM_181809:exon2:c.C419T:p.A140V	0.0277	0.987	14.69	-0.695	Transforming growth factor-beta, N-terminal
5:151043016:CTA:C	rs71757813	5	151043016	CTA	C	CTA	0.2911	1.19332	0.854533	1.66396	SPARC	frameshift deletion	SPARC:NM_001309444:exon10:c.1024_1025del:p.*342fs	0.0204	.	.	.	.
8:139701209:G:T	rs4909444	8	139701209	G	T	T	0.2912	1.048	0.96152	1.14252	COL22A1	nonsynonymous SNV	COL22A1:NM_152888:exon37:c.C2813A:p.A938D	0.3413	0.062	10.82	2.74	.
2:98736225:C:T	rs2305355	2	98736225	C	T	C	0.2939	1.08696	0.929787	1.27227	VWA3B	nonsynonymous SNV	VWA3B:NM_144992:exon4:c.C541T:p.R181W	0.0636	0.096	23.1	-2.82	von Willebrand factor, type A
6:32065023:C:T	rs41270461	6	32065023	C	T	T	0.2947	1.111	0.914809	1.34856	TNXB	nonsynonymous SNV	TNXB:NM_019105:exon3:c.G607A:p.V203M	0.0406	0.997	24	4.22	EGF-like domain|EGF-like domain, extracellular|EGF-like, conserved site
7:100675976:G:A	rs56103274	7	100675976	G	A	G	0.2948	1.04712	0.960559	1.14138	MUC17	nonsynonymous SNV	MUC17:NM_001040105:exon3:c.G1279A:p.A427T	0.4943	0.002	0.004	-2.44	.
7:103292201:G:A	rs78008536	7	103292201	G	A	G	0.2956	1.41243	0.725133	2.74945	RELN	nonsynonymous SNV	RELN:NM_005045:exon15:c.C1799T:p.S600F,RELN:NM_173054:exon15:c.C1799T:p.S600F	0.0157	0.95	28.4	5.8	Sialidases
3:186953932:C:A	rs72549154	3	186953932	C	A	A	0.2965	1.128	0.90173	1.40979	MASP1	nonsynonymous SNV	MASP1:NM_139125:exon11:c.G1727T:p.R576M	0.0323	0.005	13.25	-0.342	Peptidase S1, PA clan|Serine proteases, trypsin domain
6:75834971:T:A	rs35523808	6	75834971	T	A	A	0.2967	1.103	0.919174	1.3235	COL12A1	nonsynonymous SNV	COL12A1:NM_080645:exon25:c.A2987T:p.E996V,COL12A1:NM_004370:exon40:c.A6479T:p.E2160V	0.0587	0.999	26.8	5.22	Fibronectin type III;Fibronectin type III|Immunoglobulin-like fold
7:100646364:G:A	rs149795204	7	100646364	G	A	A	0.2985	1.092	0.926223	1.28742	MUC12	nonsynonymous SNV	MUC12:NM_001164462:exon2:c.G12520A:p.A4174T	0.2006	.	0.033	-1.8	.
1:120345596:G:A	rs12739869	1	120345596	G	A	A	0.2989	1.222	0.843294	1.76905	REG4	nonsynonymous SNV	REG4:NM_001159353:exon3:c.C260T:p.P87L	0.0145	0.728	5.134	1.52	C-type lectin|C-type lectin fold|C-type lectin-like
1:186281400:C:T	rs12134934	1	186281400	C	T	C	0.2992	1.10742	0.912069	1.34452	PRG4	nonsynonymous SNV	PRG4:NM_001127710:exon8:c.C3485T:p.T1162M,PRG4:NM_001127709:exon9:c.C3608T:p.T1203M,PRG4:NM_001127708:exon10:c.C3764T:p.T1255M,PRG4:NM_001303232:exon10:c.C3758T:p.T1253M,PRG4:NM_005807:exon11:c.C3887T:p.T1296M	0.0498	0.959	16.29	-1.59	Hemopexin-like domain
19:9003645:G:A	rs11085777	19	9003645	G	A	A	0.2994	1.054	0.954126	1.16528	MUC16	nonsynonymous SNV	MUC16:NM_024690:exon49:c.C39995T:p.T13332I	0.3974	0.001	9.367	-2.8	SEA domain
9:95284982:T:G	rs10120210	9	95284982	T	G	G	0.2996	1.053	0.955042	1.16183	ECM2	nonsynonymous SNV	ECM2:NM_001197295:exon2:c.A167C:p.Q56P,ECM2:NM_001197296:exon2:c.A167C:p.Q56P,ECM2:NM_001393:exon2:c.A167C:p.Q56P	0.5398	0.001	0.076	-0.673	.
12:9232268:T:C	rs669	12	9232268	T	C	C	0.2997	1.046	0.961481	1.13801	A2M	nonsynonymous SNV	A2M:NM_001347425:exon23:c.A2548G:p.I850V,A2M:NM_000014:exon24:c.A2998G:p.I1000V,A2M:NM_001347424:exon24:c.A2698G:p.I900V,A2M:NM_001347423:exon25:c.A2998G:p.I1000V	0.3647	0.019	0.343	0.089	Terpenoid cyclases/protein prenyltransferase alpha-alpha toroid
1:86591036:G:T	rs56046090	1	86591036	G	T	G	0.2998	1.16414	0.869323	1.55899	COL24A1	nonsynonymous SNV	COL24A1:NM_152890:exon3:c.C983A:p.T328K	0.0161	0	4.928	-3.27	.
4:88533540:A:T	rs36094464	4	88533540	A	T	A	0.3012	1.09529	0.919946	1.304	DSPP	nonsynonymous SNV	DSPP:NM_014208:exon4:c.A202T:p.R68W	0.0777	0.145	18.85	-2.26	.
8:17731611:T:A	rs35431851	8	17731611	T	A	A	0.3023	1.196	0.855422	1.67223	FGL1	nonsynonymous SNV	FGL1:NM_004467:exon5:c.A419T:p.Y140F,FGL1:NM_147203:exon5:c.A419T:p.Y140F,FGL1:NM_201552:exon6:c.A419T:p.Y140F,FGL1:NM_201553:exon6:c.A419T:p.Y140F	0.0201	1	31	5.23	Fibrinogen, alpha/beta/gamma chain, C-terminal globular domain|Fibrinogen, alpha/beta/gamma chain, C-terminal globular, subdomain 1
19:42863035:A:G	rs1206038	19	42863035	A	G	A	0.3037	1.10254	0.914663	1.32737	MEGF8	nonsynonymous SNV	MEGF8:NM_001410:exon29:c.A5071G:p.K1691E,MEGF8:NM_001271938:exon30:c.A5272G:p.K1758E	0.0527	0	0.348	1.91	Kelch-type beta propeller
10:105824333:G:A	rs805708	10	105824333	G	A	A	0.3058	1.048	0.957758	1.14701	COL17A1	nonsynonymous SNV	COL17A1:NM_000494:exon10:c.C629T:p.T210M	0.7106	1	23.2	5.57	.
15:81598269:T:G	rs11556218	15	81598269	T	G	T	0.306	1.07875	0.931462	1.24982	IL16	nonsynonymous SNV	IL16:NM_004513:exon5:c.T1338G:p.N446K,IL16:NM_172217:exon16:c.T3441G:p.N1147K,IL16:NM_001172128:exon17:c.T3441G:p.N1147K	0.0736	0.95	8.239	-6.3	PDZ domain
15:81578139:C:T	rs4072111	15	81578139	C	T	T	0.3062	1.071	0.940485	1.21818	IL16	nonsynonymous SNV	IL16:NM_172217:exon9:c.C1300T:p.P434S,IL16:NM_001172128:exon10:c.C1300T:p.P434S	0.1157	0.958	23.2	5.23	PDZ domain
6:161152905:C:T	rs4252129	6	161152905	C	T	C	0.3065	1.18483	0.850237	1.64912	PLG	nonsynonymous SNV	PLG:NM_000301:exon12:c.C1567T:p.R523W	0.0108	0.037	22.8	1.34	Kringle|Kringle-like fold
7:100637193:C:A	rs77621644	7	100637193	C	A	A	0.3071	1.073	0.936843	1.22782	MUC12	nonsynonymous SNV	MUC12:NM_001164462:exon2:c.C3349A:p.P1117T	0.2962	.	0.166	0.109	.
9:113212454:A:T	rs10817021	9	113212454	A	T	T	0.3071	1.058	0.950469	1.17916	SVEP1	nonsynonymous SNV	SVEP1:NM_153366:exon24:c.T3988A:p.L1330M	0.1676	0.036	8.888	0.456	EGF-like calcium-binding domain|EGF-like calcium-binding, conserved site|EGF-like domain|Growth factor receptor cysteine-rich domain
3:50357869:A:C	rs709210	3	50357869	A	C	C	0.3073	1.063	0.944972	1.19554	HYAL2	nonsynonymous SNV	HYAL2:NM_003773:exon2:c.T52G:p.S18A,HYAL2:NM_033158:exon3:c.T52G:p.S18A	0.6334	0	0.008	3.74	.
6:30994635:C:T	rs76100089	6	30994635	C	T	C	0.3074	1.15741	0.870924	1.53757	MUC22	nonsynonymous SNV	MUC22:NM_001198815:exon3:c.C1427T:p.T476M,MUC22:NM_001318484:exon3:c.C1436T:p.T479M,MUC22:NM_001322469:exon3:c.C1436T:p.T479M	0.0159	.	7.003	-0.722	.
3:195509573:A:G	rs28510889	3	195509573	A	G	G	0.3079	1.067	0.943197	1.20741	MUC4	nonsynonymous SNV	MUC4:NM_018406:exon2:c.T8878C:p.S2960P	0.1826	0.33	0.195	.	.
9:14846036:C:G	rs2779500	9	14846036	C	G	C	0.3083	1.05042	0.955004	1.15724	FREM1	nonsynonymous SNV	FREM1:NM_144966:exon9:c.G1315C:p.V439L	0.6323	0.012	9.487	0.988	.
6:30994730:G:A	rs77387993	6	30994730	G	A	G	0.3084	1.15607	0.870054	1.53603	MUC22	nonsynonymous SNV	MUC22:NM_001198815:exon3:c.G1522A:p.A508T,MUC22:NM_001318484:exon3:c.G1531A:p.A511T,MUC22:NM_001322469:exon3:c.G1531A:p.A511T	0.0159	.	1.03	-0.128	.
11:17579783:C:A	rs61611064	11	17579783	C	A	A	0.3096	1.097	0.918182	1.31175	OTOG	nonsynonymous SNV	OTOG:NM_001277269:exon8:c.C953A:p.A318D,OTOG:NM_001292063:exon9:c.C917A:p.A306D	0.1758	.	17.63	1.71	von Willebrand factor, type D domain
19:14694175:T:TGGA	rs34295949	19	14694175	T	TGGA	TGGA	0.31	1.101	0.915541	1.32345	CLEC17A	nonframeshift insertion	CLEC17A:NM_001204118:exon2:c.50_51insGGA:p.M17delinsME,CLEC17A:NM_207390:exon2:c.50_51insGGA:p.M17delinsME	0.0642	.	.	.	.
3:195508499:C:T	rs62282475	3	195508499	C	T	T	0.3103	1.072	0.937742	1.22419	MUC4	nonsynonymous SNV	MUC4:NM_018406:exon2:c.G9952A:p.A3318T	0.3215	0.208	6.307	-0.846	.
1:22165987:G:A	rs2291827	1	22165987	G	A	G	0.311	1.05708	0.949519	1.17798	HSPG2	nonsynonymous SNV	HSPG2:NM_001291860:exon73:c.C9769T:p.H3257Y,HSPG2:NM_005529:exon73:c.C9766T:p.H3256Y	0.1691	0.387	23.8	5.5	Immunoglobulin I-set|Immunoglobulin subtype 2|Immunoglobulin-like domain|Immunoglobulin-like fold
7:87564497:C:G	rs2279542	7	87564497	C	G	G	0.3117	1.06	0.947697	1.18497	ADAM22	nonsynonymous SNV	ADAM22:NM_001324417:exon2:c.C239G:p.P80R,ADAM22:NM_001324418:exon2:c.C242G:p.P81R,ADAM22:NM_001324419:exon2:c.C239G:p.P80R,ADAM22:NM_001324420:exon2:c.C242G:p.P81R,ADAM22:NM_001324421:exon2:c.C242G:p.P81R,ADAM22:NM_004194:exon2:c.C242G:p.P81R,ADAM22:NM_016351:exon2:c.C242G:p.P81R,ADAM22:NM_021721:exon2:c.C242G:p.P81R,ADAM22:NM_021722:exon2:c.C242G:p.P81R,ADAM22:NM_021723:exon2:c.C242G:p.P81R	0.5115	0.001	5.395	-5.26	Peptidase M12B, propeptide
6:74446214:A:G	rs148575660	6	74446214	A	G	G	0.3124	1.204	0.846369	1.71395	CD109	nonsynonymous SNV	CD109:NM_001159588:exon4:c.A385G:p.I129V,CD109:NM_001159587:exon5:c.A616G:p.I206V,CD109:NM_133493:exon5:c.A616G:p.I206V	0.0118	0.98	25.3	4.65	Alpha-2-macroglobulin, N-terminal
16:58079127:A:G	rs41504346	16	58079127	A	G	A	0.3139	1.20627	0.832402	1.7462	MMP15	nonsynonymous SNV	MMP15:NM_002428:exon10:c.A1787G:p.D596G	0.0236	0	0.025	-8	.
17:32612894:G:A	rs1129844	17	32612894	G	A	G	0.3147	1.05708	0.949519	1.17798	CCL11	nonsynonymous SNV	CCL11:NM_002986:exon1:c.G67A:p.A23T	0.1745	0.43	3.782	-1.52	.
18:335099:T:C	rs8098850	18	335099	T	C	T	0.3148	1.1236	0.892865	1.41244	COLEC12	nonsynonymous SNV	COLEC12:NM_130386:exon6:c.A1459G:p.I487V	0.0621	0	0.001	-7.86	.
1:152281142:C:G	rs141120727	1	152281142	C	G	C	0.3172	1.37741	0.724061	2.61923	FLG	nonsynonymous SNV	FLG:NM_002016:exon3:c.G6220C:p.E2074Q	0.0127	0.01	0.015	-4.18	.
5:82815408:G:A	rs2287926	5	82815408	G	A	A	0.3172	1.066	0.942254	1.20621	VCAN	nonsynonymous SNV	VCAN:NM_001164098:exon7:c.G1283A:p.G428D,VCAN:NM_004385:exon7:c.G1283A:p.G428D	0.107	0.939	8.011	0.918	.
1:152285621:T:A	rs145627745	1	152285621	T	A	T	0.3187	1.37552	0.723337	2.61661	FLG	nonsynonymous SNV	FLG:NM_002016:exon3:c.A1741T:p.T581S	0.0126	0.083	0.001	-4.3	.
5:5146377:T:C	rs1019747	5	5146377	T	C	T	0.3191	1.04384	0.95956	1.13573	ADAMTS16	nonsynonymous SNV	ADAMTS16:NM_139056:exon3:c.T310C:p.S104P	0.383	0	13.05	0.125	Peptidase M12B, propeptide
1:150525425:G:A	rs41317513	1	150525425	G	A	A	0.3196	1.107	0.907592	1.34846	ADAMTSL4	nonsynonymous SNV	ADAMTSL4:NM_001288607:exon5:c.G130A:p.E44K,ADAMTSL4:NM_001288608:exon5:c.G130A:p.E44K,ADAMTSL4:NM_019032:exon5:c.G130A:p.E44K,ADAMTSL4:NM_025008:exon5:c.G130A:p.E44K	0.0452	0.466	23.4	4.63	.
8:17731961:G:A	rs2653406	8	17731961	G	A	A	0.3199	1.08	0.928746	1.25598	FGL1	nonsynonymous SNV	FGL1:NM_004467:exon4:c.C314T:p.P105L,FGL1:NM_147203:exon4:c.C314T:p.P105L,FGL1:NM_201552:exon5:c.C314T:p.P105L,FGL1:NM_201553:exon5:c.C314T:p.P105L	0.0808	0.005	18.26	2.49	Fibrinogen, alpha/beta/gamma chain, C-terminal globular domain|Fibrinogen, alpha/beta/gamma chain, C-terminal globular, subdomain 1
8:134233024:G:A	rs72731540	8	134233024	G	A	G	0.3205	1.16009	0.860777	1.56193	WISP1	nonsynonymous SNV	WISP1:NM_003882:exon3:c.G550A:p.V184I	0.0321	0.058	9.492	2.55	VWFC domain
10:7749183:C:T	rs73621253	10	7749183	C	T	C	0.3214	1.09051	0.918072	1.29626	ITIH2	nonsynonymous SNV	ITIH2:NM_002216:exon3:c.C179T:p.S60L	0.0765	0.313	19.33	4.72	VIT domain
1:11090916:C:A	rs12711521	1	11090916	C	A	C	0.3215	1.05374	0.949443	1.16869	MASP2	nonsynonymous SNV	MASP2:NM_006610:exon9:c.G1111T:p.D371Y	0.8128	0.748	22.1	3.5	Sushi/SCR/CCP domain
1:183101582:A:G	rs61749262	1	183101582	A	G	A	0.3215	1.19048	0.83711	1.6952	LAMC1	nonsynonymous SNV	LAMC1:NM_002293:exon21:c.A3614G:p.N1205S	0.0158	0	10.83	3.09	.
9:116930194:A:G	rs2567706	9	116930194	A	G	G	0.3217	1.048	0.955883	1.14926	COL27A1	nonsynonymous SNV	COL27A1:NM_032888:exon3:c.A359G:p.Q120R	0.2475	0	2.005	2.19	Concanavalin A-like lectin/glucanase domain|Laminin G domain
1:22155353:G:A	rs74859884	1	22155353	G	A	G	0.3228	1.11607	0.894509	1.39303	HSPG2	nonsynonymous SNV	HSPG2:NM_001291860:exon88:c.C12215T:p.A4072V,HSPG2:NM_005529:exon88:c.C12212T:p.A4071V	0.0539	0.083	21.6	5.08	Concanavalin A-like lectin/glucanase domain|Laminin G domain
20:43933021:G:T	rs2072788	20	43933021	G	T	G	0.3228	1.04712	0.954927	1.14811	MATN4	nonsynonymous SNV	MATN4:NM_030590:exon3:c.C490A:p.R164S,MATN4:NM_030592:exon3:c.C490A:p.R164S,MATN4:NM_003833:exon4:c.C490A:p.R164S	0.2694	0.121	11.8	3.82	von Willebrand factor, type A
20:23586360:G:A	rs2983640	20	23586360	G	A	G	0.3233	1.04275	0.960482	1.13238	CST9	nonsynonymous SNV	CST9:NM_001008693:exon1:c.C142T:p.L48F	0.6015	0.989	6.176	-1.91	.
9:14776178:C:T	rs61732355	9	14776178	C	T	T	0.3235	1.149	0.876797	1.50603	FREM1	nonsynonymous SNV	FREM1:NM_001177704:exon2:c.G74A:p.R25Q,FREM1:NM_144966:exon26:c.G4466A:p.R1489Q	0.0217	0.004	17.09	-0.373	.
6:65300516:T:G	rs57312007	6	65300516	T	G	G	0.3241	1.062	0.944027	1.19435	EYS	nonsynonymous SNV	EYS:NM_001142800:exon26:c.A5244C:p.L1748F,EYS:NM_001292009:exon26:c.A5244C:p.L1748F	0.1402	0.4	12.53	-7.63	.
2:228163453:C:A	rs57611801	2	228163453	C	A	A	0.3243	1.126	0.892044	1.42225	COL4A3	nonsynonymous SNV	COL4A3:NM_000091:exon43:c.C3807A:p.D1269E	0.0419	0.015	12.04	0.782	.
18:7008591:T:C	rs662471	18	7008591	T	C	C	0.3249	1.047	0.955845	1.14472	LAMA1	nonsynonymous SNV	LAMA1:NM_005559:exon28:c.A4018G:p.M1340V	0.3003	0.549	9.358	-7.83	Laminin IV
14:24724663:C:T	rs35312232	14	24724663	C	T	C	0.325	1.17371	0.848437	1.62639	TGM1	nonsynonymous SNV	TGM1:NM_000359:exon11:c.G1552A:p.V518M	0.0211	0.985	28.6	4.9	Transglutaminase-like
1:111957311:G:C	rs10067	1	111957311	G	C	G	0.3251	1.08342	0.922452	1.27216	OVGP1	nonsynonymous SNV	OVGP1:NM_002557:exon11:c.C1812G:p.H604Q	0.0839	0.005	1.633	0.215	.
10:7774358:C:G	rs7084817	10	7774358	C	G	C	0.3254	1.10011	0.907483	1.33253	ITIH2	nonsynonymous SNV	ITIH2:NM_002216:exon14:c.C1705G:p.L569V	0.0484	0.978	24.7	3.45	.
11:76507692:T:A	rs1149621	11	76507692	T	A	A	0.3258	1.08	0.925112	1.26092	TSKU	nonsynonymous SNV	TSKU:NM_001258210:exon2:c.T1032A:p.D344E,TSKU:NM_001318477:exon2:c.T1074A:p.D358E,TSKU:NM_001318478:exon2:c.T1032A:p.D344E,TSKU:NM_001318479:exon2:c.T1032A:p.D344E,TSKU:NM_015516:exon2:c.T1032A:p.D344E	0.7532	0	0.038	-4.78	.
6:30955043:G:A	rs9262385	6	30955043	G	A	G	0.3262	1.24844	0.795488	1.95972	MUC21	nonsynonymous SNV	MUC21:NM_001010909:exon2:c.G1091A:p.G364E	0.0105	0.005	0.001	-6.61	Tandem-repeating region of mucin, epiglycanin-like
4:79240063:A:G	rs345513	4	79240063	A	G	G	0.3272	1.042	0.959522	1.13125	FRAS1	nonsynonymous SNV	FRAS1:NM_001166133:exon18:c.A2060G:p.D687G,FRAS1:NM_025074:exon18:c.A2060G:p.D687G	0.3939	0	0.009	3.96	Growth factor receptor cysteine-rich domain
3:130134492:T:C	rs16827497	3	130134492	T	C	C	0.3273	1.05	0.952181	1.15835	COL6A5	nonsynonymous SNV	COL6A5:NM_001278298:exon23:c.T4765C:p.S1589P,COL6A5:NM_153264:exon23:c.T4765C:p.S1589P	0.7907	0.001	0.278	-5.28	.
19:17025292:G:A	rs706761	19	17025292	G	A	G	0.3289	1.04167	0.959522	1.13125	CPAMD8	nonsynonymous SNV	CPAMD8:NM_015692:exon29:c.C3944T:p.T1315I	0.5581	0.572	22.7	1.8	Alpha-macroglobulin complement component|Terpenoid cyclases/protein prenyltransferase alpha-alpha toroid
9:113312231:G:C	rs61751937	9	113312231	G	C	G	0.3292	1.18483	0.837847	1.67685	SVEP1	nonsynonymous SNV	SVEP1:NM_153366:exon2:c.C685G:p.R229G	0.0281	0.999	28.3	4.59	von Willebrand factor, type A
12:10066205:T:A	rs138914180	12	10066205	T	A	T	0.3294	1.22399	0.806961	1.85982	CLEC2A	nonsynonymous SNV	CLEC2A:NM_001130711:exon5:c.A485T:p.D162V	0.0127	0.23	19.68	2.51	C-type lectin|C-type lectin fold|C-type lectin-like
10:72520254:C:T	rs61736607	10	72520254	C	T	C	0.3301	1.08342	0.920646	1.27466	ADAMTS14	nonsynonymous SNV	ADAMTS14:NM_080722:exon22:c.C3317T:p.P1106L,ADAMTS14:NM_139155:exon22:c.C3326T:p.P1109L	0.0647	0.006	11.29	3.53	.
12:6103094:C:A	rs34230288	12	6103094	C	A	A	0.3301	1.148	0.874205	1.50748	VWF	nonsynonymous SNV	VWF:NM_000552:exon37:c.G6532T:p.A2178S	0.021	0.002	8.584	-0.724	Uncharacterised domain, cysteine-rich
20:43803613:C:T	rs17333103	20	43803613	C	T	T	0.3306	1.054	0.949443	1.16869	PI3	nonsynonymous SNV	PI3:NM_002638:exon1:c.C50T:p.T17M	0.1762	0.085	0.39	-5.75	.
3:130368069:A:G	rs7614116	3	130368069	A	G	A	0.3317	1.04603	0.955845	1.14472	COL6A6	nonsynonymous SNV	COL6A6:NM_001102608:exon32:c.A5396G:p.H1799R	0.2923	0	0.169	5.42	von Willebrand factor, type A
6:46806809:C:T	rs1804211	6	46806809	C	T	C	0.3317	1.04603	0.955845	1.14472	MEP1A	nonsynonymous SNV	MEP1A:NM_005588:exon14:c.C2177T:p.T726M	0.3653	0.918	12.36	-1.33	.
12:10224073:T:G	rs77910243	12	10224073	T	G	T	0.3322	1.17096	0.845895	1.62151	CLEC1A	nonsynonymous SNV	CLEC1A:NM_001297749:exon4:c.A426C:p.R142S,CLEC1A:NM_001297748:exon5:c.A603C:p.R201S,CLEC1A:NM_001297751:exon6:c.A438C:p.R146S,CLEC1A:NM_016511:exon6:c.A702C:p.R234S,CLEC1A:NM_001297750:exon7:c.A438C:p.R146S	0.0176	0.476	15.51	3.59	C-type lectin|C-type lectin fold|C-type lectin-like
16:22128153:T:G	rs143979988	16	22128153	T	G	T	0.3324	1.21065	0.816311	1.79492	VWA3A	nonsynonymous SNV	VWA3A:NM_173615:exon10:c.T889G:p.F297V	0.0152	0	0.001	-11.1	von Willebrand factor, type A
3:100560860:G:A	rs73135597	3	100560860	G	A	G	0.3334	1.11111	0.896193	1.37933	ABI3BP	nonsynonymous SNV	ABI3BP:NM_001349329:exon18:c.C1555T:p.P519S,ABI3BP:NM_001349330:exon19:c.C1621T:p.P541S,ABI3BP:NM_001349331:exon19:c.C1621T:p.P541S	0.0716	0.009	5.633	0.99	.
9:92017824:C:T	rs13284404	9	92017824	C	T	C	0.3343	1.10375	0.900469	1.3537	SEMA4D	nonsynonymous SNV	SEMA4D:NM_001142287:exon6:c.G214A:p.A72T,SEMA4D:NM_006378:exon6:c.G214A:p.A72T	0.047	0.718	28.5	4.78	Sema domain|WD40/YVTN repeat-like-containing domain
12:6182828:A:T	rs1800387	12	6182828	A	T	T	0.3355	1.189	0.838719	1.68519	VWF	nonsynonymous SNV	VWF:NM_000552:exon8:c.T954A:p.N318K	0.0286	0.005	12.53	-3.54	Trypsin Inhibitor-like, cysteine rich domain
11:1263776:C:T	rs2943510	11	1263776	C	T	C	0.3357	1.06157	0.938493	1.20139	MUC5B	nonsynonymous SNV	MUC5B:NM_002458:exon31:c.C5666T:p.P1889L	0.1382	0.144	9.354	2.72	.
13:111111235:G:A	rs7990383	13	111111235	G	A	G	0.3361	1.04603	0.953973	1.14697	COL4A2	nonsynonymous SNV	COL4A2:NM_001846:exon22:c.G1550A:p.R517K	0.5972	0	0.001	-10.1	.
5:177987740:C:T	rs34594012	5	177987740	C	T	C	0.3372	1.07527	0.925927	1.24727	COL23A1	nonsynonymous SNV	COL23A1:NM_173465:exon2:c.G304A:p.G102R	0.0829	1	22.5	4.97	.
6:30996314:A:G	rs75683091	6	30996314	A	G	A	0.3384	1.16686	0.845016	1.61349	MUC22	nonsynonymous SNV	MUC22:NM_001198815:exon3:c.A3106G:p.M1036V,MUC22:NM_001318484:exon3:c.A3115G:p.M1039V,MUC22:NM_001322469:exon3:c.A3115G:p.M1039V	0.0144	.	0.002	-6.38	.
17:7462555:G:A	rs11552708	17	7462555	G	A	A	0.3398	1.064	0.936693	1.20852	TNFSF13	nonsynonymous SNV	TNFSF13:NM_001198622:exon1:c.G199A:p.G67R,TNFSF13:NM_001198623:exon1:c.G199A:p.G67R,TNFSF13:NM_003808:exon1:c.G199A:p.G67R,TNFSF13:NM_172087:exon1:c.G199A:p.G67R,TNFSF13:NM_172088:exon1:c.G199A:p.G67R,TNFSF13:NM_001198624:exon2:c.G148A:p.G50R	0.106	0	6.77	2.21	.
17:34311387:T:C	rs16971802	17	34311387	T	C	T	0.3423	1.0989	0.90303	1.33643	CCL14	nonsynonymous SNV	CCL14:NM_032963:exon2:c.A181G:p.K61E,CCL14:NM_032962:exon3:c.A229G:p.K77E	0.0478	0.943	25.3	4.05	CC chemokine, conserved site|Chemokine interleukin-8-like domain;Chemokine interleukin-8-like domain
19:8203328:G:A	rs7246376	19	8203328	G	A	G	0.3424	1.05374	0.945728	1.17328	FBN3	nonsynonymous SNV	FBN3:NM_001321431:exon9:c.C986T:p.P329L,FBN3:NM_032447:exon9:c.C986T:p.P329L	0.169	0.031	6.13	2.05	TB domain
16:69988373:T:C	rs2549097	16	69988373	T	C	T	0.3438	1.05042	0.950317	1.16063	CLEC18A	nonsynonymous SNV	CLEC18A:NM_001136214:exon4:c.T353C:p.V118A,CLEC18A:NM_001271197:exon4:c.T353C:p.V118A,CLEC18A:NM_182619:exon4:c.T353C:p.V118A	0.747	0	0.002	-0.237	CAP domain
3:195509861:A:G	rs375079438	3	195509861	A	G	G	0.3448	1.26	0.785559	2.02053	MUC4	nonsynonymous SNV	MUC4:NM_018406:exon2:c.T8590C:p.S2864P	0.0908	0.01	2.688	.	.
7:100647594:A:C	rs111391555	7	100647594	A	C	A	0.3448	1.04603	0.953973	1.14697	MUC12	nonsynonymous SNV	MUC12:NM_001164462:exon2:c.A13750C:p.T4584P	0.7154	.	0.056	-0.918	.
7:100550873:G:A	rs74836112	7	100550873	G	A	A	0.3462	1.063	0.935756	1.20732	MUC3A	nonsynonymous SNV	MUC3A:NM_005960:exon4:c.G1454A:p.R485H	0.4994	.	.	.	.
8:32621630:C:T	rs80127039	8	32621630	C	T	T	0.347	1.139	0.871517	1.49111	NRG1	nonsynonymous SNV	NRG1:NM_001322197:exon8:c.C1162T:p.R388W,NRG1:NM_001322202:exon8:c.C859T:p.R287W,NRG1:NM_001322201:exon9:c.C859T:p.R287W,NRG1:NM_001322205:exon9:c.C1813T:p.R605W,NRG1:NM_013957:exon12:c.C1624T:p.R542W,NRG1:NM_013964:exon12:c.C1633T:p.R545W,NRG1:NM_013956:exon13:c.C1648T:p.R550W	0.0215	1	33	5.75	Neuregulin, C-terminal
9:101748356:A:G	rs2075663	9	101748356	A	G	G	0.3471	1.041	0.958563	1.13012	COL15A1	nonsynonymous SNV	COL15A1:NM_001855:exon3:c.A610G:p.M204V	0.3802	0	10.08	4.34	Concanavalin A-like lectin/glucanase domain|Laminin G domain
6:46801071:G:T	rs2274658	6	46801071	G	T	G	0.3475	1.04384	0.955806	1.1402	MEP1A	nonsynonymous SNV	MEP1A:NM_005588:exon11:c.G1405T:p.V469L	0.4092	0.001	5.355	1.18	MATH/TRAF domain|TRAF-like
2:189932764:G:A	rs35830636	2	189932764	G	A	G	0.3481	1.09649	0.902993	1.33115	COL5A2	nonsynonymous SNV	COL5A2:NM_000393:exon21:c.C1378T:p.P460S	0.0534	0.019	24.6	5.74	.
3:129293256:T:C	rs2255703	3	129293256	T	C	T	0.3486	1.05042	0.947546	1.16635	PLXND1	nonsynonymous SNV	PLXND1:NM_015103:exon12:c.A2608G:p.M870V	0.3741	0	0.001	0.907	.
6:70984436:A:G	rs592121	6	70984436	A	G	A	0.3489	1.04058	0.956686	1.13233	COL9A1	nonsynonymous SNV	COL9A1:NM_078485:exon5:c.T286C:p.S96P,COL9A1:NM_001851:exon11:c.T1015C:p.S339P	0.391	0.001	15.04	4.98	Concanavalin A-like lectin/glucanase domain|Laminin G domain
8:24261547:C:T	rs147608974	8	24261547	C	T	C	0.3489	1.21951	0.796666	1.86511	ADAMDEC1	nonsynonymous SNV	ADAMDEC1:NM_001145272:exon12:c.C1115T:p.T372M,ADAMDEC1:NM_014479:exon13:c.C1352T:p.T451M,ADAMDEC1:NM_001145271:exon14:c.C1115T:p.T372M	0.0113	1	23.3	2.69	Disintegrin domain;Metallopeptidase, catalytic domain|Peptidase M12B, ADAM/reprolysin
10:115343057:G:C	rs11575688	10	115343057	G	C	C	0.3494	1.149	0.863156	1.52984	HABP2	nonsynonymous SNV	HABP2:NM_001177660:exon10:c.G1099C:p.E367Q,HABP2:NM_004132:exon10:c.G1177C:p.E393Q	0.0155	0.478	23.3	5.15	Peptidase S1, PA clan|Serine proteases, trypsin domain
17:32647831:A:C	rs1133763	17	32647831	A	C	A	0.3508	1.0582	0.939357	1.19311	CCL8	nonsynonymous SNV	CCL8:NM_005623:exon3:c.A205C:p.K69Q	0.1545	0.871	23.1	3.09	CC chemokine, conserved site|Chemokine interleukin-8-like domain
7:100635661:T:C	rs10953313	7	100635661	T	C	T	0.3514	1.04603	0.952105	1.14922	MUC12	nonsynonymous SNV	MUC12:NM_001164462:exon2:c.T1817C:p.M606T	0.7355	.	0.007	0.471	.
9:18829952:A:G	rs41304755	9	18829952	A	G	A	0.3521	1.04712	0.951191	1.15262	ADAMTSL1	nonsynonymous SNV	ADAMTSL1:NM_001040272:exon23:c.A4226G:p.D1409G	0.2633	0.137	19.61	4.48	Immunoglobulin I-set|Immunoglobulin subtype 2|Immunoglobulin-like domain|Immunoglobulin-like fold;Immunoglobulin I-set|Immunoglobulin subtype|Immunoglobulin subtype 2|Immunoglobulin-like domain|Immunoglobulin-like fold
4:79205699:T:A	rs12504081	4	79205699	T	A	A	0.3526	1.042	0.955768	1.13569	FRAS1	nonsynonymous SNV	FRAS1:NM_001166133:exon13:c.T1396A:p.L466I,FRAS1:NM_025074:exon13:c.T1396A:p.L466I	0.3523	0.945	21.1	4.33	EGF-like domain|Growth factor receptor cysteine-rich domain;Growth factor receptor cysteine-rich domain
8:17739639:C:A	rs78484373	8	17739639	C	A	C	0.354	1.14811	0.853884	1.54336	FGL1	nonsynonymous SNV	FGL1:NM_004467:exon3:c.G113T:p.R38L,FGL1:NM_147203:exon3:c.G113T:p.R38L,FGL1:NM_201552:exon4:c.G113T:p.R38L,FGL1:NM_201553:exon4:c.G113T:p.R38L	0.0409	0.418	15.96	-8.5	.
15:43527819:T:C	rs35985214	15	43527819	T	C	C	0.355	1.15	0.858954	1.5404	TGM5	nonsynonymous SNV	TGM5:NM_004245:exon9:c.A1316G:p.Q439R,TGM5:NM_201631:exon10:c.A1562G:p.Q521R	0.0161	0.004	3.381	1.73	Immunoglobulin-like fold|Transglutaminase, C-terminal;Transglutaminase-like
8:17726069:C:A	rs2653414	8	17726069	C	A	A	0.3553	1.176	0.839356	1.64727	FGL1	nonsynonymous SNV	FGL1:NM_004467:exon7:c.G767T:p.W256L,FGL1:NM_147203:exon7:c.G767T:p.W256L,FGL1:NM_201552:exon8:c.G767T:p.W256L,FGL1:NM_201553:exon8:c.G767T:p.W256L	0.0135	1	33	4.35	Fibrinogen, alpha/beta/gamma chain, C-terminal globular domain|Fibrinogen, alpha/beta/gamma chain, C-terminal globular, subdomain 2|Fibrinogen, conserved site
7:12400783:C:T	rs35171886	7	12400783	C	T	C	0.3558	1.0627	0.933924	1.20969	VWDE	nonsynonymous SNV	VWDE:NM_001346972:exon13:c.G2804A:p.C935Y,VWDE:NM_001346973:exon13:c.G2339A:p.C780Y,VWDE:NM_001135924:exon15:c.G3149A:p.C1050Y	0.099	1	26	4.27	.
3:124646837:G:A	rs4679394	3	124646837	G	A	A	0.3564	1.053	0.942933	1.1744	MUC13	nonsynonymous SNV	MUC13:NM_033049:exon2:c.C53T:p.A18V	0.1536	0.799	7.206	-0.446	.
7:12401021:C:T	rs80272295	7	12401021	C	T	C	0.3565	1.0627	0.933924	1.20969	VWDE	nonsynonymous SNV	VWDE:NM_001346972:exon12:c.G2680A:p.G894R,VWDE:NM_001346973:exon12:c.G2215A:p.G739R,VWDE:NM_001135924:exon14:c.G3025A:p.G1009R	0.0989	0.09	11.78	0.825	.
7:73474825:G:C	rs17855988	7	73474825	G	C	C	0.3567	1.133	0.869706	1.47639	ELN	nonsynonymous SNV	ELN:NM_001278913:exon21:c.G1498C:p.G500R,ELN:NM_001278918:exon21:c.G1474C:p.G492R,ELN:NM_001278916:exon22:c.G1597C:p.G533R,ELN:NM_001081752:exon23:c.G1654C:p.G552R,ELN:NM_001278914:exon23:c.G1669C:p.G557R,ELN:NM_001081753:exon24:c.G1699C:p.G567R,ELN:NM_001081755:exon24:c.G1684C:p.G562R,ELN:NM_001278917:exon24:c.G1711C:p.G571R,ELN:NM_000501:exon25:c.G1741C:p.G581R,ELN:NM_001081754:exon25:c.G1756C:…	0.0919	1	23.2	3.46	.
2:71043461:C:T	rs722896	2	71043461	C	T	C	0.357	1.04275	0.952981	1.14129	CLEC4F	nonsynonymous SNV	CLEC4F:NM_001258027:exon4:c.G1052A:p.R351H,CLEC4F:NM_001321308:exon4:c.G1052A:p.R351H,CLEC4F:NM_173535:exon4:c.G1052A:p.R351H	0.2949	0.002	8.923	-5.05	.
8:99045866:G:A	rs17831160	8	99045866	G	A	G	0.3593	1.11607	0.878868	1.41782	MATN2	nonsynonymous SNV	MATN2:NM_001317748:exon17:c.G2671A:p.V891I,MATN2:NM_002380:exon18:c.G2794A:p.V932I,MATN2:NM_030583:exon18:c.G2737A:p.V913I	0.0346	0.963	24.7	4.84	Matrilin, coiled-coil trimerisation domain;von Willebrand factor, type A
19:8118000:A:G	rs960173	19	8118000	A	G	G	0.3601	1.148	0.857238	1.53732	CCL25	nonsynonymous SNV	CCL25:NM_001201359:exon2:c.A67G:p.T23A,CCL25:NM_005624:exon2:c.A67G:p.T23A	0.0267	0	0.001	-6.34	Chemokine interleukin-8-like domain
11:17632306:C:T	rs1003490	11	17632306	C	T	C	0.3603	1.06045	0.933887	1.2049	OTOG	nonsynonymous SNV	OTOG:NM_001277269:exon35:c.C5495T:p.A1832V,OTOG:NM_001292063:exon36:c.C5459T:p.A1820V	0.1634	0.995	23.4	5.01	Trypsin Inhibitor-like, cysteine rich domain
5:131396478:C:T	rs40401	5	131396478	C	T	C	0.3609	1.04712	0.94747	1.15715	IL3	nonsynonymous SNV	IL3:NM_000588:exon1:c.C79T:p.P27S	0.2415	0.032	0.28	1.18	.
3:186572089:T:C	rs17366743	3	186572089	T	C	C	0.3623	1.114	0.88575	1.40119	ADIPOQ	nonsynonymous SNV	ADIPOQ:NM_004797:exon3:c.T331C:p.Y111H,ADIPOQ:NM_001177800:exon4:c.T331C:p.Y111H	0.0247	0.006	11.63	3.07	C1q domain|Tumour necrosis factor-like domain
19:9045821:G:A	rs61744216	19	9045821	G	A	A	0.3628	1.106	0.891723	1.37245	MUC16	nonsynonymous SNV	MUC16:NM_024690:exon5:c.C35810T:p.T11937I	0.0317	0.003	11.81	-2.27	.
15:74219582:G:A	rs3825942	15	74219582	G	A	A	0.363	1.054	0.941124	1.18138	LOXL1	nonsynonymous SNV	LOXL1:NM_005576:exon1:c.G458A:p.G153D	0.1563	0.001	23.2	3.17	.
11:58378424:A:G	rs8373	11	58378424	A	G	A	0.3632	1.04712	0.94747	1.15715	ZFP91;ZFP91	nonsynonymous SNV	ZFP91:NM_053023:exon5:c.A619G:p.S207G	0.2397	0.915	24.9	5.76	.
11:58378424:A:G	rs8373	11	58378424	A	G	A	0.3632	1.04712	0.94747	1.15715	ZFP91;ZFP91	nonsynonymous SNV	ZFP91:NM_053023:exon5:c.A619G:p.S207G	0.2397	0.915	24.9	5.76	.
6:30954709:G:A	rs11756238	6	30954709	G	A	G	0.3651	1.14679	0.850509	1.5433	MUC21	nonsynonymous SNV	MUC21:NM_001010909:exon2:c.G757A:p.G253S	0.1106	0.005	0.749	1.82	Tandem-repeating region of mucin, epiglycanin-like
7:100549865:C:T	rs35420758	7	100549865	C	T	T	0.3662	1.07	0.92404	1.23986	MUC3A	nonsynonymous SNV	MUC3A:NM_005960:exon2:c.C446T:p.T149M	0.1909	.	15.87	-0.735	.
1:183099560:G:A	rs20559	1	183099560	G	A	G	0.3669	1.07875	0.91426	1.27079	LAMC1	nonsynonymous SNV	LAMC1:NM_002293:exon19:c.G3362A:p.R1121Q	0.0666	0.014	23.2	4.76	.
9:33750845:G:C	rs855551	9	33750845	G	C	G	0.3675	1.06045	0.932058	1.20727	PRSS3	nonsynonymous SNV	PRSS3:NM_001197098:exon1:c.G14C:p.G5A	0.1232	.	2.48	-3.9	.
19:9075565:C:T	rs17000836	19	9075565	C	T	T	0.368	1.07	0.92404	1.23986	MUC16	nonsynonymous SNV	MUC16:NM_024690:exon3:c.G11881A:p.E3961K	0.0833	0.017	7.524	-1.97	.
2:1481155:G:T	rs2280132	2	1481155	G	T	G	0.3685	1.03842	0.956648	1.12786	TPO	nonsynonymous SNV	TPO:NM_175721:exon7:c.G1117T:p.A373S,TPO:NM_000547:exon8:c.G1117T:p.A373S,TPO:NM_001206744:exon8:c.G1117T:p.A373S,TPO:NM_001206745:exon8:c.G1117T:p.A373S,TPO:NM_175719:exon8:c.G1117T:p.A373S	0.4867	0.004	0.006	-1.27	.
10:7772035:A:G	rs35524242	10	7772035	A	G	A	0.369	1.09051	0.902019	1.31932	ITIH2	nonsynonymous SNV	ITIH2:NM_002216:exon12:c.A1400G:p.N467S	0.0487	0.367	0.011	1.64	von Willebrand factor, type A
3:130125116:G:C	rs1497312	3	130125116	G	C	C	0.3693	1.046	0.946523	1.15599	COL6A5	nonsynonymous SNV	COL6A5:NM_001278298:exon17:c.G4430C:p.C1477S,COL6A5:NM_153264:exon17:c.G4430C:p.C1477S	0.789	0	0.371	0.227	.
1:155160941:C:T	rs11465205	1	155160941	C	T	T	0.3701	1.154	0.84647	1.57252	MUC1	nonsynonymous SNV	MUC1:NM_001204285:exon4:c.G586A:p.G196S,MUC1:NM_001204286:exon4:c.G613A:p.G205S	0.0284	0.669	0.351	-1.11	.
11:102593248:T:C	rs1940475	11	102593248	T	C	T	0.3703	1.03842	0.955692	1.12673	MMP8	nonsynonymous SNV	MMP8:NM_002424:exon2:c.A259G:p.K87E,MMP8:NM_001304441:exon3:c.A190G:p.K64E,MMP8:NM_001304442:exon3:c.A190G:p.K64E	0.4983	0.001	5.667	-6.06	Metallopeptidase, catalytic domain|Peptidoglycan binding-like
1:40226134:C:T	rs41267039	1	40226134	C	T	C	0.3712	1.14025	0.850441	1.53112	BMP8B	nonsynonymous SNV	BMP8B:NM_001720:exon7:c.G1166A:p.R389H	0.0184	0.999	35	3.29	Cystine-knot cytokine|Transforming growth factor-beta, C-terminal
11:58378422:G:A	rs79135825	11	58378422	G	A	G	0.3712	1.12108	0.869532	1.44745	ZFP91	.	.	0.0396	.	25	5.86	.
4:144619314:T:G	rs61745865	4	144619314	T	G	T	0.372	1.07066	0.920425	1.24473	FREM3	nonsynonymous SNV	FREM3:NM_001168235:exon1:c.A2515C:p.I839L	0.0714	.	17.68	1.33	.
14:94942578:C:T	rs143584404	14	94942578	C	T	T	0.372	1.174	0.82951	1.66017	SERPINA9	nonsynonymous SNV	SERPINA9:NM_001284275:exon1:c.G14A:p.G5E	0.0178	0.94	11.14	1.14	Serpin domain
1:152276583:C:G	rs12083389	1	152276583	C	G	C	0.3723	1.07296	0.917778	1.25583	FLG	nonsynonymous SNV	FLG:NM_002016:exon3:c.G10779C:p.E3593D	0.0684	0.014	0.151	2.54	.
14:94935807:G:A	rs35347445	14	94935807	G	A	A	0.3727	1.17	0.833535	1.64227	SERPINA9	nonsynonymous SNV	SERPINA9:NM_001284275:exon2:c.C317T:p.P106L,SERPINA9:NM_175739:exon2:c.C425T:p.P142L	0.0125	0.993	21.9	3.04	Serpin domain
19:8197958:C:T	rs36124795	19	8197958	C	T	T	0.3728	1.082	0.910756	1.28593	FBN3	nonsynonymous SNV	FBN3:NM_001321431:exon14:c.G1624A:p.V542I,FBN3:NM_032447:exon14:c.G1624A:p.V542I	0.0515	0.047	1.943	-5.52	EGF-like calcium-binding domain|EGF-like calcium-binding, conserved site|EGF-like domain|Growth factor receptor cysteine-rich domain
9:78969059:C:A	rs7036921	9	78969059	C	A	C	0.3734	1.04275	0.950165	1.14239	PCSK5	nonsynonymous SNV	PCSK5:NM_001190482:exon36:c.C5097A:p.D1699E	0.261	.	0.198	0.028	Growth factor receptor cysteine-rich domain
5:5146395:A:G	rs1863968	5	5146395	A	G	G	0.3738	1.039	0.954775	1.13007	ADAMTS16	nonsynonymous SNV	ADAMTS16:NM_139056:exon3:c.A328G:p.M110V	0.6154	0.005	0.002	-11.5	Peptidase M12B, propeptide
7:45932669:A:G	rs4619	7	45932669	A	G	A	0.374	1.0395	0.953858	1.13342	IGFBP1	nonsynonymous SNV	IGFBP1:NM_000596:exon4:c.A759G:p.I253M	0.3517	0.001	0.006	1.51	Thyroglobulin type-1
18:29797921:C:T	rs616114	18	29797921	C	T	C	0.3744	1.03842	0.954775	1.13007	MEP1B	nonsynonymous SNV	MEP1B:NM_001308171:exon14:c.C2084T:p.P695L,MEP1B:NM_005925:exon14:c.C2084T:p.P695L	0.384	0	6.164	0.414	.
1:86512536:C:T	rs60891279	1	86512536	C	T	T	0.3747	1.052	0.941087	1.17671	COL24A1	nonsynonymous SNV	COL24A1:NM_152890:exon12:c.G1922A:p.R641H	0.1583	0.025	24	4.22	.
2:1481231:G:C	rs2175977	2	1481231	G	C	G	0.3747	1.0395	0.953858	1.13342	TPO	nonsynonymous SNV	TPO:NM_175721:exon7:c.G1193C:p.S398T,TPO:NM_000547:exon8:c.G1193C:p.S398T,TPO:NM_001206744:exon8:c.G1193C:p.S398T,TPO:NM_001206745:exon8:c.G1193C:p.S398T,TPO:NM_175719:exon8:c.G1193C:p.S398T	0.6015	0.998	23.5	4.08	.
20:44642406:G:C	rs2250889	20	44642406	G	C	G	0.3749	1.09529	0.898562	1.33504	MMP9	nonsynonymous SNV	MMP9:NM_004994:exon10:c.G1721C:p.R574P	0.9511	0	15.04	3.9	Hemopexin-like domain
1:11090897:A:G	rs2273346	1	11090897	A	G	G	0.375	1.141	0.857135	1.51916	MASP2	nonsynonymous SNV	MASP2:NM_006610:exon9:c.T1130C:p.V377A	0.0177	0.002	1.4	2.81	Sushi/SCR/CCP domain
10:81706324:A:G	rs721917	10	81706324	A	G	G	0.3751	1.038	0.955692	1.12673	SFTPD	nonsynonymous SNV	SFTPD:NM_003019:exon2:c.T92C:p.M31T	0.4336	0	0.003	-1.35	.
7:100549967:C:T	rs73714231	7	100549967	C	T	T	0.3753	1.068	0.92489	1.23131	MUC3A	nonsynonymous SNV	MUC3A:NM_005960:exon2:c.C548T:p.T183M	0.1881	.	18.08	0.741	.
3:130135644:C:A	rs76864445	3	130135644	C	A	C	0.3754	1.20482	0.790255	1.83565	COL6A5	nonsynonymous SNV	COL6A5:NM_001278298:exon24:c.C4868A:p.P1623H,COL6A5:NM_153264:exon24:c.C4868A:p.P1623H	0.0145	0.999	24	5.29	.
7:132070054:T:C	rs741664	7	132070054	T	C	C	0.3757	1.038	0.954775	1.13007	PLXNA4	nonsynonymous SNV	PLXNA4:NM_001105543:exon4:c.A1372G:p.M458V	0.5706	0	3.048	-4.6	Sema domain|WD40/YVTN repeat-like-containing domain
4:79443850:G:A	rs931606	4	79443850	G	A	A	0.3759	1.038	0.955692	1.12673	FRAS1	nonsynonymous SNV	FRAS1:NM_025074:exon69:c.G10696A:p.V3566I	0.5153	0	8.962	4.93	.
9:21206743:G:T	rs112963053	9	21206743	G	T	T	0.3764	1.115	0.87799	1.4164	IFNA10	nonsynonymous SNV	IFNA10:NM_002171:exon1:c.C354A:p.D118E	0.038	0	0.093	-7.51	Four-helical cytokine, core|Four-helical cytokine-like, core
9:136305530:C:G	rs28647808	9	136305530	C	G	C	0.3765	1.06724	0.923079	1.23373	ADAMTS13	nonsynonymous SNV	ADAMTS13:NM_139025:exon16:c.C1852G:p.P618A,ADAMTS13:NM_139026:exon16:c.C1759G:p.P587A,ADAMTS13:NM_139027:exon16:c.C1852G:p.P618A	0.09	1	24.9	5.12	.
6:46803102:A:G	rs2297019	6	46803102	A	G	G	0.3771	1.045	0.949291	1.15032	MEP1A	nonsynonymous SNV	MEP1A:NM_005588:exon13:c.A1900G:p.M634V	0.223	0	0.001	-6.73	.
8:17743051:A:T	rs61745164	8	17743051	A	T	A	0.3778	1.13895	0.848742	1.52806	FGL1	nonsynonymous SNV	FGL1:NM_004467:exon2:c.T13A:p.F5I,FGL1:NM_147203:exon2:c.T13A:p.F5I,FGL1:NM_201552:exon3:c.T13A:p.F5I,FGL1:NM_201553:exon3:c.T13A:p.F5I	0.0409	0.017	0.004	-5.54	.
14:77951124:C:T	rs3742728	14	77951124	C	T	T	0.3805	1.042	0.950165	1.14239	ISM2	nonsynonymous SNV	ISM2:NM_182509:exon2:c.G280A:p.A94T,ISM2:NM_199296:exon2:c.G280A:p.A94T	0.6643	0.213	21	0.674	.
14:94776221:A:C	rs2228541	14	94776221	A	C	A	0.3814	1.03734	0.955692	1.12673	SERPINA6	nonsynonymous SNV	SERPINA6:NM_001756:exon3:c.T736G:p.S246A	0.4654	0.001	0.002	-10.7	Serpin domain
7:87704999:G:A	rs111428945	7	87704999	G	A	A	0.3815	1.135	0.858713	1.49828	ADAM22	nonsynonymous SNV	ADAM22:NM_001324417:exon4:c.G379A:p.E127K,ADAM22:NM_001324418:exon4:c.G382A:p.E128K,ADAM22:NM_001324419:exon4:c.G379A:p.E127K,ADAM22:NM_001324420:exon4:c.G382A:p.E128K,ADAM22:NM_001324421:exon4:c.G382A:p.E128K,ADAM22:NM_004194:exon4:c.G382A:p.E128K,ADAM22:NM_016351:exon4:c.G382A:p.E128K,ADAM22:NM_021721:exon4:c.G382A:p.E128K,ADAM22:NM_021722:exon4:c.G382A:p.E128K,ADAM22:NM_021723:exon4:c.G382A:p.…	0.0251	0.322	22.7	4.34	Peptidase M12B, propeptide
20:46365636:C:T	rs56218501	20	46365636	C	T	C	0.3837	1.04603	0.946523	1.15599	SULF2	nonsynonymous SNV	SULF2:NM_001161841:exon3:c.G226A:p.A76T,SULF2:NM_018837:exon3:c.G226A:p.A76T,SULF2:NM_198596:exon3:c.G226A:p.A76T	0.2041	0.002	19.85	5.44	Alkaline phosphatase-like, alpha/beta/alpha|Alkaline-phosphatase-like, core domain|Sulfatase, N-terminal
9:113276356:C:G	rs3818764	9	113276356	C	G	G	0.384	1.051	0.941049	1.17206	SVEP1	nonsynonymous SNV	SVEP1:NM_153366:exon4:c.G995C:p.G332A	0.2009	0.067	13.47	3.61	Growth factor receptor cysteine-rich domain|Tyrosine-protein kinase ephrin type A/B receptor-like
3:186443018:T:C	rs1656922	3	186443018	T	C	T	0.3849	1.03734	0.954736	1.1256	KNG1	nonsynonymous SNV	KNG1:NM_000893:exon4:c.T533C:p.M178T,KNG1:NM_001102416:exon4:c.T533C:p.M178T,KNG1:NM_001166451:exon4:c.T533C:p.M178T	0.5146	0	0.001	-0.388	Cystatin domain|Kininogen-type cystatin domain
3:130103709:G:A	rs1453241	3	130103709	G	A	G	0.385	1.04603	0.94467	1.15826	COL6A5	nonsynonymous SNV	COL6A5:NM_001278298:exon5:c.G1363A:p.E455K,COL6A5:NM_153264:exon5:c.G1363A:p.E455K	0.2014	0	0.105	-6.05	von Willebrand factor, type A
15:100821576:G:A	rs7496668	15	100821576	G	A	G	0.3856	1.0395	0.952905	1.13229	ADAMTS17	nonsynonymous SNV	ADAMTS17:NM_139057:exon4:c.C647T:p.S216L	0.3279	0.009	11.87	3.57	.
2:227886773:A:G	rs3752895	2	227886773	A	G	A	0.3858	1.03734	0.955692	1.12673	COL4A4	nonsynonymous SNV	COL4A4:NM_000092:exon44:c.T4207C:p.S1403P	0.4417	0	20.6	5.63	.
7:100648029:G:A	rs10953315	7	100648029	G	A	G	0.3868	1.04058	0.951077	1.13901	MUC12	nonsynonymous SNV	MUC12:NM_001164462:exon2:c.G14185A:p.A4729T	0.7345	.	0.018	-1.19	.
19:41306650:C:T	rs61750953	19	41306650	C	T	T	0.3876	1.181	0.814322	1.71498	EGLN2	nonsynonymous SNV	EGLN2:NM_053046:exon2:c.C173T:p.S58L,EGLN2:NM_080732:exon2:c.C173T:p.S58L	0.0162	0.014	25.9	2.52	.
8:52366300:A:G	rs7833909	8	52366300	A	G	G	0.3886	1.054	0.935607	1.18834	PXDNL	nonsynonymous SNV	PXDNL:NM_144651:exon10:c.T1028C:p.I343T	0.1356	0.463	13.92	1.65	Immunoglobulin I-set|Immunoglobulin subtype 2|Immunoglobulin-like domain|Immunoglobulin-like fold
1:152186490:C:T	rs201463788	1	152186490	C	T	C	0.3887	1.09051	0.89408	1.32838	HRNR	nonsynonymous SNV	HRNR:NM_001009931:exon3:c.G7615A:p.G2539S	0.0394	0.663	11.22	-1.4	.
19:10085054:G:A	rs3815745	19	10085054	G	A	G	0.3892	1.04384	0.946485	1.15142	COL5A3	nonsynonymous SNV	COL5A3:NM_015719:exon46:c.C3373T:p.P1125S	0.2432	0.993	24.4	4.89	.
9:136301982:C:G	rs2301612	9	136301982	C	G	C	0.3896	1.0661	0.922157	1.23249	ADAMTS13	nonsynonymous SNV	ADAMTS13:NM_139025:exon12:c.C1342G:p.Q448E,ADAMTS13:NM_139026:exon12:c.C1249G:p.Q417E,ADAMTS13:NM_139027:exon12:c.C1342G:p.Q448E	0.4661	0	0.324	4.25	.
11:102576382:G:A	rs12099177	11	102576382	G	A	G	0.3896	1.07527	0.910647	1.27074	MMP27	nonsynonymous SNV	MMP27:NM_022122:exon1:c.C64T:p.R22W	0.0792	0.058	23.9	0.533	Metallopeptidase, catalytic domain|Peptidoglycan binding-like
7:149518148:A:G	rs10233245	7	149518148	A	G	G	0.3899	1.057	0.931089	1.20129	SSPO	nonsynonymous SNV	SSPO:NM_198455:exon87:c.A12491G:p.H4164R	0.3417	0	7.92	-1.89	VWC out|VWFC domain
13:95034749:G:A	rs1535692	13	95034749	G	A	A	0.3906	1.047	0.943763	1.16169	GPC6	nonsynonymous SNV	GPC6:NM_005708:exon7:c.G1234A:p.V412M	0.201	0.112	14.03	3.97	.
16:22157582:C:A	rs61744122	16	22157582	C	A	C	0.3907	1.1236	0.857718	1.47326	VWA3A	nonsynonymous SNV	VWA3A:NM_173615:exon27:c.C2756A:p.T919K	0.0407	0.869	20.9	2.85	.
9:113132221:G:A	rs17204533	9	113132221	G	A	G	0.3908	1.04932	0.939206	1.17436	SVEP1	nonsynonymous SNV	SVEP1:NM_153366:exon47:c.C10676T:p.T3559M	0.1669	0.995	25.1	4.91	EGF-like domain|EGF-like, conserved site
7:100637547:G:A	rs199815226	7	100637547	G	A	G	0.3918	1.07759	0.90712	1.28079	MUC12	nonsynonymous SNV	MUC12:NM_001164462:exon2:c.G3703A:p.A1235T	0.0565	.	0.37	-1.29	.
2:183699584:G:C	rs7775	2	183699584	G	C	G	0.3921	1.0989	0.882921	1.3696	FRZB	nonsynonymous SNV	FRZB:NM_001463:exon6:c.C970G:p.R324G	0.0777	0.114	22.7	3.6	.
9:117826096:G:T	rs113301777	9	117826096	G	T	G	0.3926	1.14286	0.836407	1.55993	TNC	nonsynonymous SNV	TNC:NM_002160:exon12:c.C3739A:p.L1247I	0.0132	0.633	21.6	3.95	Fibronectin type III|Immunoglobulin-like fold
7:100637887:A:G	rs149317664	7	100637887	A	G	G	0.3939	1.06	0.927484	1.2108	MUC12	nonsynonymous SNV	MUC12:NM_001164462:exon2:c.A4043G:p.D1348G	0.0816	.	0.026	-1.44	.
5:157002695:C:T	rs11465228	5	157002695	C	T	T	0.3943	1.079	0.908028	1.28208	ADAM19	nonsynonymous SNV	ADAM19:NM_033274:exon1:c.G10A:p.G4S	0.067	0.447	20.5	1.88	.
6:46803018:A:T	rs2297020	6	46803018	A	T	T	0.3948	1.043	0.947394	1.14802	MEP1A	nonsynonymous SNV	MEP1A:NM_005588:exon13:c.A1816T:p.T606S	0.2223	0.126	0.001	-10.4	.
19:4236996:G:A	rs4740	19	4236996	G	A	A	0.3957	1.04	0.950127	1.13787	EBI3	nonsynonymous SNV	EBI3:NM_005755:exon5:c.G601A:p.V201I	0.3023	0.06	0.002	-8.95	Fibronectin type III|Immunoglobulin-like fold
6:159655190:G:A	rs192765104	6	159655190	G	A	A	0.3958	1.163	0.825307	1.63886	FNDC1	nonsynonymous SNV	FNDC1:NM_032532:exon11:c.G3646A:p.D1216N	0.0149	0.168	13.72	2.47	.
1:22310807:A:G	rs114365157	1	22310807	A	G	G	0.3969	1.106	0.87785	1.39414	CELA3B	nonsynonymous SNV	CELA3B:NM_007352:exon6:c.A625G:p.I209V	0.0417	0	0.001	-0.787	Peptidase S1, PA clan|Serine proteases, trypsin domain
19:9065203:T:C	rs62118307	19	9065203	T	C	C	0.3971	1.066	0.921235	1.23126	MUC16	nonsynonymous SNV	MUC16:NM_024690:exon3:c.A22243G:p.S7415G	0.0834	0.005	0.008	-2.82	.
14:52520746:G:T	rs35657569	14	52520746	G	T	G	0.3979	1.06157	0.922083	1.22277	NID2	nonsynonymous SNV	NID2:NM_007361:exon4:c.C1061A:p.P354H	0.0942	0.995	12.21	1.27	.
2:238243464:C:G	rs2270669	2	238243464	C	G	C	0.398	1.04275	0.947394	1.14802	COL6A3	nonsynonymous SNV	COL6A3:NM_057166:exon38:c.G7213C:p.A2405P,COL6A3:NM_057167:exon40:c.G8416C:p.A2806P,COL6A3:NM_004369:exon41:c.G9034C:p.A3012P	0.764	0	21.5	5.29	Fibronectin type III|Immunoglobulin-like fold;von Willebrand factor, type A
19:9075346:T:A	rs2591592	19	9075346	T	A	T	0.3984	1.03627	0.954736	1.1256	MUC16	nonsynonymous SNV	MUC16:NM_024690:exon3:c.A12100T:p.I4034F	0.5668	0.986	2.569	-1.05	.
12:9009820:G:A	rs1558526	12	9009820	G	A	G	0.3986	1.04167	0.948304	1.14463	A2ML1	nonsynonymous SNV	A2ML1:NM_001282424:exon13:c.G1436A:p.C479Y,A2ML1:NM_144670:exon24:c.G2909A:p.C970Y	0.2337	1	26.6	1.81	Alpha-2-macroglobulin, N-terminal 2;Alpha-2-macroglobulin, conserved site|Alpha-2-macroglobulin, thiol-ester bond-forming|Terpenoid cyclases/protein prenyltransferase alpha-alpha toroid
9:116931666:A:T	rs2567705	9	116931666	A	T	T	0.3987	1.038	0.951953	1.13116	COL27A1	nonsynonymous SNV	COL27A1:NM_032888:exon3:c.A1831T:p.I611F	0.3593	0	16.51	4.66	.
19:8121369:C:T	rs1129763	19	8121369	C	T	T	0.3996	1.051	0.936468	1.18015	CCL25	nonsynonymous SNV	CCL25:NM_001201359:exon4:c.C311T:p.T104M,CCL25:NM_005624:exon4:c.C311T:p.T104M	0.1565	0.013	2.853	-5.63	Chemokine interleukin-8-like domain
7:81359051:C:T	rs5745687	7	81359051	C	T	C	0.3997	1.07527	0.907955	1.27196	HGF	nonsynonymous SNV	HGF:NM_000601:exon8:c.G910A:p.E304K,HGF:NM_001010932:exon8:c.G895A:p.E299K	0.0627	0.515	22.4	4.53	Kringle|Kringle-like fold
5:38438505:G:C	rs35767836	5	38438505	G	C	C	0.4003	1.24	0.7566	2.0318	EGFLAM	nonsynonymous SNV	EGFLAM:NM_182798:exon12:c.G1710C:p.E570D,EGFLAM:NM_001205301:exon17:c.G2412C:p.E804D,EGFLAM:NM_152403:exon17:c.G2412C:p.E804D	0.0217	0.003	8.208	1.47	Concanavalin A-like lectin/glucanase domain|EGF-like domain;Fibronectin type III|Immunoglobulin-like fold
6:31540556:T:C	rs2229094	6	31540556	T	C	C	0.4019	1.043	0.945539	1.15027	LTA	nonsynonymous SNV	LTA:NM_000595:exon2:c.T37C:p.C13R,LTA:NM_001159740:exon2:c.T37C:p.C13R	0.248	0	0.029	1.26	.
19:48523128:G:A	rs35362679	19	48523128	G	A	G	0.4033	1.12108	0.855149	1.46885	ELSPBP1	nonsynonymous SNV	ELSPBP1:NM_022142:exon5:c.G508A:p.D170N	0.0204	0.999	26.2	3.76	Fibronectin, type II, collagen-binding;Fibronectin, type II, collagen-binding|Kringle-like fold
14:70924697:A:G	rs45545935	14	70924697	A	G	A	0.4038	1.06724	0.914077	1.24588	ADAM21	nonsynonymous SNV	ADAM21:NM_003813:exon2:c.A481G:p.I161V	0.0985	0.002	0.001	-5.66	.
11:130297748:G:C	rs35468629	11	130297748	G	C	C	0.404	1.14	0.841306	1.54465	ADAMTS8	nonsynonymous SNV	ADAMTS8:NM_007037:exon1:c.C434G:p.A145G	0.0381	0	0.024	-8.36	Peptidase M12B, propeptide
19:9069507:G:T	rs144202009	19	9069507	G	T	T	0.4047	1.159	0.824449	1.63075	MUC16	nonsynonymous SNV	MUC16:NM_024690:exon3:c.C17939A:p.T5980N	0.0124	0.938	0.058	-0.55	.
4:75248505:G:T	rs78803121	4	75248505	G	T	G	0.4048	1.14548	0.829112	1.58312	EREG	nonsynonymous SNV	EREG:NM_001432:exon4:c.G422T:p.C141F	0.048	0.85	18.29	3.84	.
4:75675841:A:T	rs11938093	4	75675841	A	T	T	0.4048	1.042	0.946447	1.14687	BTC	nonsynonymous SNV	BTC:NM_001729:exon4:c.T370A:p.L124M	0.2456	0.999	24.4	2.94	.
15:100692845:A:G	rs28567966	15	100692845	A	G	A	0.4055	1.05042	0.935532	1.17897	ADAMTS17	nonsynonymous SNV	ADAMTS17:NM_139057:exon10:c.T1445C:p.M482T	0.1488	0	0.887	2.64	ADAM, cysteine-rich
7:100634887:G:A	rs117387753	7	100634887	G	A	G	0.4059	1.1534	0.818731	1.6258	MUC12	nonsynonymous SNV	MUC12:NM_001164462:exon2:c.G1043A:p.R348H	0.0168	.	11.82	-1.39	.
17:66538239:G:T	rs2302234	17	66538239	G	T	T	0.4087	1.039	0.949177	1.13673	FAM20A	nonsynonymous SNV	FAM20A:NM_017565:exon7:c.C996A:p.N332K,FAM20A:NM_001243746:exon8:c.C582A:p.N194K	0.2815	0.811	23.4	5.02	FAM20, C-terminal
1:186275564:C:T	rs12128607	1	186275564	C	T	C	0.4088	1.0846	0.893115	1.31658	PRG4	nonsynonymous SNV	PRG4:NM_001127710:exon4:c.C311T:p.T104M,PRG4:NM_001127709:exon5:c.C434T:p.T145M,PRG4:NM_001127708:exon6:c.C590T:p.T197M,PRG4:NM_001303232:exon6:c.C584T:p.T195M,PRG4:NM_005807:exon7:c.C713T:p.T238M	0.0495	0.132	0.014	-7.94	.
6:30993776:A:T	rs115709409	6	30993776	A	T	A	0.4091	1.05708	0.925631	1.20838	MUC22	nonsynonymous SNV	MUC22:NM_001198815:exon3:c.A568T:p.T190S,MUC22:NM_001318484:exon3:c.A577T:p.T193S,MUC22:NM_001322469:exon3:c.A577T:p.T193S	0.1261	.	0.194	-1.39	.
2:79313990:C:T	rs62640882	2	79313990	C	T	C	0.4092	1.09769	0.877709	1.37223	REG1B	nonsynonymous SNV	REG1B:NM_006507:exon3:c.G131A:p.R44H	0.0459	0.496	22.8	-0.261	C-type lectin|C-type lectin fold|C-type lectin-like
1:236141174:T:C	rs3213190	1	236141174	T	C	C	0.4098	1.045	0.941878	1.15937	NID1	nonsynonymous SNV	NID1:NM_002508:exon20:c.A3737G:p.Q1246R	0.1694	0	9.458	2.79	Six-bladed beta-propeller, TolB-like
14:94756450:T:A	rs2232700	14	94756450	T	A	T	0.4098	1.04712	0.93823	1.16855	SERPINA10	nonsynonymous SNV	SERPINA10:NM_001100607:exon2:c.A481T:p.T161S,SERPINA10:NM_016186:exon2:c.A481T:p.T161S	0.1695	0	0.001	-9.94	Serpin domain
8:52366156:C:T	rs79394014	8	52366156	C	T	T	0.4099	1.157	0.822802	1.62749	PXDNL	nonsynonymous SNV	PXDNL:NM_144651:exon10:c.G1172A:p.R391Q	0.0115	0	1.498	-4.25	Immunoglobulin I-set|Immunoglobulin subtype 2|Immunoglobulin-like domain|Immunoglobulin-like fold
2:113537223:C:A	rs17561	2	113537223	C	A	A	0.41	1.038	0.950089	1.13338	IL1A	nonsynonymous SNV	IL1A:NM_000575:exon5:c.G340T:p.A114S	0.2937	0.982	22.5	4.44	.
19:10079093:C:T	rs3815746	19	10079093	C	T	C	0.4107	1.04167	0.944594	1.14912	COL5A3	nonsynonymous SNV	COL5A3:NM_015719:exon59:c.G4282A:p.V1428M	0.2404	0.015	14.58	1.72	.
12:51739648:C:G	rs17860287	12	51739648	C	G	G	0.4112	1.057	0.92652	1.20481	CELA1	nonsynonymous SNV	CELA1:NM_001971:exon2:c.G30C:p.Q10H	0.1027	0.343	24.2	4.07	.
2:33246146:G:A	rs35340726	2	33246146	G	A	G	0.4132	1.09409	0.880241	1.3601	LTBP1	nonsynonymous SNV	LTBP1:NM_206943:exon3:c.G736A:p.E246K	0.0363	0.002	19.5	4.09	.
2:217543728:G:A	rs11575194	2	217543728	G	A	G	0.4132	1.0917	0.882779	1.34808	IGFBP5	nonsynonymous SNV	IGFBP5:NM_000599:exon2:c.C412T:p.R138W	0.036	0.999	26.5	4.18	.
3:130361856:G:A	rs16830494	3	130361856	G	A	G	0.4148	1.0582	0.922932	1.21434	COL6A6	nonsynonymous SNV	COL6A6:NM_001102608:exon30:c.G5216A:p.R1739Q	0.0966	0.272	23.2	3.06	.
10:7622009:G:A	rs41298373	10	7622009	G	A	G	0.4149	1.05932	0.922932	1.21434	ITIH5	nonsynonymous SNV	ITIH5:NM_032817:exon5:c.C485T:p.A162V,ITIH5:NM_001001851:exon9:c.C1127T:p.A376V,ITIH5:NM_030569:exon9:c.C1127T:p.A376V	0.1119	1	27.9	5.23	von Willebrand factor, type A
19:41858876:C:G	rs1800471	19	41858876	C	G	G	0.4151	1.072	0.907919	1.26693	TGFB1	nonsynonymous SNV	TGFB1:NM_000660:exon1:c.G74C:p.R25P	0.0794	0.012	26.3	2.77	.
1:32052529:C:A	rs113639076	1	32052529	C	A	A	0.4153	1.134	0.841205	1.52641	TINAGL1	nonsynonymous SNV	TINAGL1:NM_001204414:exon11:c.C1260A:p.F420L,TINAGL1:NM_001204415:exon11:c.C1038A:p.F346L,TINAGL1:NM_022164:exon12:c.C1353A:p.F451L	0.014	1	24.6	-0.189	Peptidase C1A, papain C-terminal
10:75673101:T:C	rs2227564	10	75673101	T	C	T	0.4163	1.04932	0.934597	1.17779	PLAU	nonsynonymous SNV	PLAU:NM_001145031:exon5:c.T371C:p.L124P,PLAU:NM_001319191:exon5:c.T164C:p.L55P,PLAU:NM_002658:exon6:c.T422C:p.L141P	0.7406	0.676	3.304	3.07	Kringle|Kringle-like fold
19:9070194:A:G	rs1344572	19	9070194	A	G	G	0.4168	1.075	0.902632	1.27946	MUC16	nonsynonymous SNV	MUC16:NM_024690:exon3:c.T17252C:p.I5751T	0.9322	0	0.081	0.669	.
6:66204945:G:A	rs12193967	6	66204945	G	A	A	0.417	1.042	0.944594	1.14912	EYS	nonsynonymous SNV	EYS:NM_198283:exon3:c.C359T:p.T120M,EYS:NM_001142800:exon4:c.C359T:p.T120M,EYS:NM_001142801:exon4:c.C359T:p.T120M,EYS:NM_001292009:exon4:c.C359T:p.T120M	0.2141	0.063	22.8	-1.74	.
8:41166637:GGCT:G	rs3832595	8	41166637	GGCT	G	G	0.417	1.039	0.947318	1.13897	SFRP1	nonframeshift deletion	SFRP1:NM_003012:exon1:c.39_41del:p.13_14del	0.4046	.	.	.	.
10:124345796:C:G	rs143892520	10	124345796	C	G	G	0.4171	1.263	0.726352	2.19399	DMBT1	nonsynonymous SNV	DMBT1:NM_017579:exon15:c.C1650G:p.D550E,DMBT1:NM_001320644:exon16:c.C1680G:p.D560E,DMBT1:NM_007329:exon16:c.C1680G:p.D560E	0.0155	0.351	12.66	-9	SRCR domain|SRCR-like domain
2:242021742:G:T	rs2108485	2	242021742	G	T	T	0.4172	1.047	0.936393	1.17084	SNED1	nonsynonymous SNV	SNED1:NM_001080437:exon29:c.G4084T:p.A1362S	0.1489	0	8.569	3.31	EGF-like domain
6:32017242:C:T	rs41258944	6	32017242	C	T	C	0.4172	1.0846	0.891366	1.31917	TNXB	nonsynonymous SNV	TNXB:NM_019105:exon28:c.G9556A:p.V3186I	0.055	0.99	22	3.51	Fibronectin type III|Immunoglobulin-like fold
18:61322995:T:C	rs1065205	18	61322995	T	C	T	0.4172	1.07411	0.903499	1.27568	SERPINB3	nonsynonymous SNV	SERPINB3:NM_006919:exon8:c.A1069G:p.T357A	0.0911	0	0.152	-5.92	Serpin domain
1:31349647:C:T	rs2491132	1	31349647	C	T	C	0.4173	1.04275	0.942744	1.15138	SDC3	nonsynonymous SNV	SDC3:NM_014654:exon3:c.G622A:p.V208I	0.2407	0.002	0.003	-8.71	.
18:61160320:G:C	rs2289520	18	61160320	G	C	G	0.4174	1.0846	0.891366	1.31917	SERPINB5	nonsynonymous SNV	SERPINB5:NM_002639:exon5:c.G559C:p.V187L	0.0578	0.006	7.731	0.338	Serpin domain
16:77323235:C:G	rs3743749	16	77323235	C	G	C	0.4176	1.04932	0.934597	1.17779	ADAMTS18	nonsynonymous SNV	ADAMTS18:NM_001326358:exon22:c.G2960C:p.S987T,ADAMTS18:NM_199355:exon22:c.G3476C:p.S1159T	0.1586	0.116	19.58	4.82	.
15:89436295:G:A	rs8039131	15	89436295	G	A	A	0.418	1.036	0.951915	1.12669	HAPLN3	stopgain	HAPLN3:NM_001307952:exon2:c.C49T:p.Q17X	0.3215	.	2.033	-0.305	.
15:84651057:G:A	rs140206840	15	84651057	G	A	A	0.4181	1.11	0.864261	1.42744	ADAMTSL3	nonsynonymous SNV	ADAMTSL3:NM_001301110:exon21:c.G2677A:p.E893K,ADAMTSL3:NM_207517:exon21:c.G2677A:p.E893K	0.026	0.002	11.29	3.17	.
18:21511034:C:A	rs1154232	18	21511034	C	A	A	0.4181	1.042	0.942744	1.15138	LAMA3	nonsynonymous SNV	LAMA3:NM_001127718:exon27:c.C3450A:p.N1150K,LAMA3:NM_000227:exon28:c.C3618A:p.N1206K,LAMA3:NM_001127717:exon64:c.C8277A:p.N2759K,LAMA3:NM_198129:exon65:c.C8445A:p.N2815K	0.2115	0	9.004	2.56	Concanavalin A-like lectin/glucanase domain;Concanavalin A-like lectin/glucanase domain|Laminin G domain
2:36583461:G:T	rs3821169	2	36583461	G	T	G	0.4182	1.23916	0.728943	2.10889	CRIM1	nonsynonymous SNV	CRIM1:NM_016441:exon1:c.G26T:p.G9V	0.0101	0.006	25.3	0.447	.
9:136319589:G:A	rs28503257	9	136319589	G	A	A	0.4188	1.112	0.860915	1.43873	ADAMTS13	nonsynonymous SNV	ADAMTS13:NM_139025:exon24:c.G3097A:p.A1033T,ADAMTS13:NM_139026:exon24:c.G3004A:p.A1002T,ADAMTS13:NM_139027:exon24:c.G3097A:p.A1033T	0.0416	0.999	32	5.59	.
12:9016456:C:T	rs73040625	12	9016456	C	T	C	0.419	1.0627	0.915798	1.23363	A2ML1	nonsynonymous SNV	A2ML1:NM_001282424:exon18:c.C2096T:p.A699V,A2ML1:NM_144670:exon29:c.C3569T:p.A1190V	0.0823	0.147	8.479	-1.35	Alpha-macroglobulin complement component|Terpenoid cyclases/protein prenyltransferase alpha-alpha toroid
2:238244863:TGCA:T	rs71704006	2	238244863	TGCA	T	T	0.4192	1.056	0.925594	1.2036	COL6A3	nonframeshift deletion	COL6A3:NM_057166:exon37:c.7056_7058del:p.2352_2353del,COL6A3:NM_057167:exon39:c.8259_8261del:p.2753_2754del,COL6A3:NM_004369:exon40:c.8877_8879del:p.2959_2960del	0.1076	.	.	.	.
14:23313633:G:A	rs17880989	14	23313633	G	A	A	0.4202	1.109	0.864227	1.42179	MMP14	nonsynonymous SNV	MMP14:NM_004995:exon7:c.G1065A:p.M355I	0.0273	0.264	24.3	4.97	Hemopexin-like domain
1:115829178:C:T	rs11466111	1	115829178	C	T	T	0.4212	1.137	0.834702	1.55066	NGF	nonsynonymous SNV	NGF:NM_002506:exon3:c.G239A:p.R80Q	0.0201	1	32	5.06	.
2:238244781:T:C	rs11690358	2	238244781	T	C	C	0.4214	1.057	0.922895	1.20954	COL6A3	nonsynonymous SNV	COL6A3:NM_057166:exon37:c.A7141G:p.M2381V,COL6A3:NM_057167:exon39:c.A8344G:p.M2782V,COL6A3:NM_004369:exon40:c.A8962G:p.M2988V	0.0929	0	1.618	-4.78	von Willebrand factor, type A
10:81319214:G:T	rs1059046	10	81319214	G	T	G	0.4215	1.05485	0.926483	1.20005	SFTPA2	nonsynonymous SNV	SFTPA2:NM_001320814:exon2:c.C56A:p.T19N,SFTPA2:NM_001098668:exon3:c.C26A:p.T9N,SFTPA2:NM_001320813:exon3:c.C26A:p.T9N	0.5751	0.838	0.003	0.636	.
4:74904296:G:T	rs182216932	4	74904296	G	T	T	0.4226	1.159	0.812402	1.65163	CXCL3	nonsynonymous SNV	CXCL3:NM_002090:exon1:c.C33A:p.S11R	0.0118	0.94	6.759	-0.099	.
18:6980523:T:C	rs607230	18	6980523	T	C	C	0.4237	1.037	0.948228	1.1356	LAMA1	nonsynonymous SNV	LAMA1:NM_005559:exon42:c.A6004G:p.K2002E	0.7259	0	17.6	3.34	.
2:27308159:G:A	rs36045790	2	27308159	G	A	G	0.4264	1.10619	0.859126	1.42453	EMILIN1	nonsynonymous SNV	EMILIN1:NM_007046:exon7:c.G2707A:p.E903K	0.0297	0	11.66	4.06	C1q domain|Tumour necrosis factor-like domain
5:168112927:G:C	rs35305517	5	168112927	G	C	C	0.4269	1.103	0.868385	1.40091	SLIT3	nonsynonymous SNV	SLIT3:NM_001271946:exon31:c.C3341G:p.P1114R,SLIT3:NM_003062:exon31:c.C3320G:p.P1107R	0.0252	0	0.464	2.17	EGF-like calcium-binding domain|EGF-like domain|EGF-like, conserved site|Growth factor receptor cysteine-rich domain
9:113168501:A:G	rs41278435	9	113168501	A	G	A	0.4269	1.09051	0.879326	1.35337	SVEP1	nonsynonymous SNV	SVEP1:NM_153366:exon38:c.T9379C:p.S3127P	0.0373	0.002	0.007	-6	Sushi/SCR/CCP domain
5:115811273:C:T	rs17432496	5	115811273	C	T	T	0.4278	1.086	0.886176	1.33221	SEMA6A	nonsynonymous SNV	SEMA6A:NM_001300780:exon16:c.G1676A:p.R559H,SEMA6A:NM_020796:exon16:c.G1676A:p.R559H	0.0435	0	23	4.19	.
2:74761539:T:A	rs17010021	2	74761539	T	A	T	0.4282	1.11235	0.851667	1.45145	LOXL3	nonsynonymous SNV	LOXL3:NM_001289165:exon7:c.A760T:p.I254F,LOXL3:NM_001289164:exon9:c.A1408T:p.I470F,LOXL3:NM_032603:exon11:c.A1843T:p.I615F	0.037	0.996	25.7	3.7	SRCR domain|SRCR-like domain
11:102562700:C:T	rs2509010	11	102562700	C	T	T	0.4282	1.037	0.948228	1.1356	MMP27	nonsynonymous SNV	MMP27:NM_022122:exon10:c.G1339A:p.D447N	0.2882	0.576	23.4	3.86	Hemopexin-like domain
6:33136310:G:T	rs2229784	6	33136310	G	T	G	0.4283	1.10619	0.859126	1.42453	COL11A2	nonsynonymous SNV	COL11A2:NM_080679:exon51:c.C3625A:p.P1209T,COL11A2:NM_080681:exon52:c.C3688A:p.P1230T,COL11A2:NM_080680:exon54:c.C3946A:p.P1316T	0.0219	0.982	23.4	3.38	.
3:195510655:T:G	rs372590482	3	195510655	T	G	G	0.4286	1.049	0.931835	1.17892	MUC4	nonsynonymous SNV	MUC4:NM_018406:exon2:c.A7796C:p.Y2599S	0.4275	0.001	0.899	.	.
18:6992683:T:A	rs16950981	18	6992683	T	A	A	0.4286	1.15	0.81788	1.61776	LAMA1	nonsynonymous SNV	LAMA1:NM_005559:exon36:c.A5045T:p.D1682V	0.0121	0.72	18.89	0.086	Laminin alpha, domain I
3:195516305:C:T	rs3749331	3	195516305	C	T	T	0.43	1.047	0.934559	1.17314	MUC4	nonsynonymous SNV	MUC4:NM_018406:exon2:c.G2146A:p.A716T	0.1761	0.064	0.038	-5.21	.
16:19297219:T:G	rs179196	16	19297219	T	G	T	0.4303	1.07759	0.893008	1.30103	CLEC19A	nonsynonymous SNV	CLEC19A:NM_001256720:exon1:c.T46G:p.S16A	0.0868	0.088	8.132	4.94	.
19:9048895:A:C	rs2012761	19	9048895	A	C	C	0.4305	1.061	0.917558	1.22635	MUC16	nonsynonymous SNV	MUC16:NM_024690:exon5:c.T32736G:p.S10912R	0.0824	0.112	15.1	-1.16	.
14:94756750:T:C	rs941591	14	94756750	T	C	T	0.432	1.04493	0.936356	1.16621	SERPINA10	nonsynonymous SNV	SERPINA10:NM_001100607:exon2:c.A181G:p.S61G,SERPINA10:NM_016186:exon2:c.A181G:p.S61G	0.1698	0	0.001	-2.32	.
8:17743020:G:A	rs484373	8	17743020	G	A	A	0.4327	1.041	0.941802	1.15023	FGL1	nonsynonymous SNV	FGL1:NM_004467:exon2:c.C44T:p.T15I,FGL1:NM_147203:exon2:c.C44T:p.T15I,FGL1:NM_201552:exon3:c.C44T:p.T15I,FGL1:NM_201553:exon3:c.C44T:p.T15I	0.7944	0	0.013	2.39	.
6:30994026:C:A	NA	6	30994026	C	A	A	0.433	1.059	0.918439	1.22272	MUC22	nonsynonymous SNV	MUC22:NM_001198815:exon3:c.C818A:p.T273K,MUC22:NM_001318484:exon3:c.C827A:p.T276K,MUC22:NM_001322469:exon3:c.C827A:p.T276K	0.0166	.	7.37	1.92	.
3:130190716:G:A	rs73868680	3	130190716	G	A	G	0.4346	1.07875	0.891259	1.30359	COL6A5	nonsynonymous SNV	COL6A5:NM_001278298:exon40:c.G7765A:p.A2589T	0.1379	0.78	7.945	1.24	.
9:101778265:G:T	rs2297603	9	101778265	G	T	G	0.4353	1.05485	0.921972	1.20833	COL15A1	nonsynonymous SNV	COL15A1:NM_001855:exon11:c.G1511T:p.G504V	0.1296	0.01	0.654	-1.87	.
16:56500132:C:T	rs34883368	16	56500132	C	T	C	0.4371	1.08814	0.876692	1.34932	OGFOD1	nonsynonymous SNV	OGFOD1:NM_001324357:exon5:c.C514T:p.P172S,OGFOD1:NM_001324358:exon5:c.C352T:p.P118S,OGFOD1:NM_001324359:exon5:c.C226T:p.P76S,OGFOD1:NM_001324360:exon5:c.C226T:p.P76S,OGFOD1:NM_001324361:exon5:c.C352T:p.P118S,OGFOD1:NM_001324362:exon5:c.C97T:p.P33S,OGFOD1:NM_001324363:exon5:c.C517T:p.P173S,OGFOD1:NM_018233:exon5:c.C517T:p.P173S	0.0425	0.001	8.103	-2.46	Oxoglutarate/iron-dependent dioxygenase|Prolyl 4-hydroxylase, alpha subunit;Prolyl 4-hydroxylase, alpha subunit
8:99033441:G:A	rs61729731	8	99033441	G	A	A	0.4372	1.164	0.797495	1.69941	MATN2	nonsynonymous SNV	MATN2:NM_001317748:exon12:c.G1705A:p.V569I,MATN2:NM_002380:exon13:c.G1828A:p.V610I,MATN2:NM_030583:exon13:c.G1828A:p.V610I	0.0162	0.002	16.52	1.44	EGF-like domain;EGF-like domain|Growth factor receptor cysteine-rich domain
12:91366649:G:C	rs17784152	12	91366649	G	C	G	0.4378	1.14286	0.811395	1.61123	EPYC	nonsynonymous SNV	EPYC:NM_004950:exon4:c.C449G:p.S150C	0.0225	0.984	26.8	5.98	Leucine-rich repeat domain, L domain-like
9:14776140:C:T	rs10961700	9	14776140	C	T	T	0.4382	1.045	0.934522	1.1685	FREM1	nonsynonymous SNV	FREM1:NM_001177704:exon2:c.G112A:p.V38M,FREM1:NM_144966:exon26:c.G4504A:p.V1502M	0.1714	0.06	19.13	2.73	.
17:34304605:C:A	rs79254649	17	34304605	C	A	A	0.439	1.109	0.854978	1.44005	CCL16	nonsynonymous SNV	CCL16:NM_004590:exon3:c.G360T:p.Q120H	0.0206	0.657	8.796	-8.76	.
11:130297948:C:G	rs7927048	11	130297948	C	G	C	0.4397	1.03734	0.945426	1.13669	ADAMTS8	nonsynonymous SNV	ADAMTS8:NM_007037:exon1:c.G234C:p.E78D	0.5913	0	12.53	-1.93	Peptidase M12B, propeptide
7:100552627:A:G	rs112039162	7	100552627	A	G	A	0.4402	1.18765	0.764143	1.84596	MUC3A	nonsynonymous SNV	MUC3A:NM_005960:exon4:c.A3208G:p.S1070G	0.0137	0.989	23.5	1.79	.
19:9068530:C:T	rs7250080	19	9068530	C	T	T	0.4409	1.059	0.914846	1.22753	MUC16	nonsynonymous SNV	MUC16:NM_024690:exon3:c.G18916A:p.V6306M	0.0832	0.96	2.868	1.06	.
15:66206204:G:A	rs3803414	15	66206204	G	A	A	0.4416	1.055	0.921051	1.20712	MEGF11	nonsynonymous SNV	MEGF11:NM_032445:exon20:c.C2581T:p.L861F	0.0807	0.911	25.9	3.69	Laminin EGF domain
18:6997818:A:C	rs12961939	18	6997818	A	C	A	0.4421	1.03734	0.944519	1.14006	LAMA1	nonsynonymous SNV	LAMA1:NM_005559:exon33:c.T4729G:p.S1577A	0.2581	0.364	9.175	4.18	Laminin alpha, domain I
3:186459475:C:G	rs5030084	3	186459475	C	G	C	0.4428	1.09649	0.864054	1.39392	KNG1	nonsynonymous SNV	KNG1:NM_001102416:exon10:c.C1290G:p.D430E	0.0294	0.791	21.8	2.98	.
4:8293193:G:A	rs111620813	4	8293193	G	A	A	0.4428	1.149	0.810682	1.62886	HTRA3	nonsynonymous SNV	HTRA3:NM_001297559:exon4:c.G805A:p.V269M,HTRA3:NM_053044:exon4:c.G805A:p.V269M	0.0104	1	26.6	4.19	Peptidase S1, PA clan
19:48519158:C:T	rs34129198	19	48519158	C	T	T	0.4429	1.051	0.92552	1.19411	ELSPBP1	nonsynonymous SNV	ELSPBP1:NM_022142:exon4:c.C217T:p.R73C	0.1585	0.491	30	2.21	Fibronectin, type II, collagen-binding|Kringle-like fold
18:61323259:A:T	rs150069636	18	61323259	A	T	A	0.4433	1.21212	0.735798	1.99931	SERPINB3	nonsynonymous SNV	SERPINB3:NM_006919:exon8:c.T805A:p.W269R	0.0456	1	24.7	3.07	Serpin domain
3:122060404:C:T	rs34173813	3	122060404	C	T	T	0.444	1.047	0.930903	1.17774	CSTA	nonsynonymous SNV	CSTA:NM_005213:exon3:c.C287T:p.T96M	0.142	0.865	23	-7.34	Cystatin domain
16:22155629:A:G	rs9937453	16	22155629	A	G	A	0.4443	1.04384	0.93542	1.16505	VWA3A	nonsynonymous SNV	VWA3A:NM_173615:exon26:c.A2654G:p.N885S	0.1781	0.007	0.586	-1.42	.
19:8161450:C:T	rs3829817	19	8161450	C	T	C	0.4453	1.03842	0.941765	1.14568	FBN3	nonsynonymous SNV	FBN3:NM_001321431:exon44:c.G5417A:p.R1806Q,FBN3:NM_032447:exon44:c.G5417A:p.R1806Q	0.2209	0.017	17.66	-1.51	EGF-like domain|Growth factor receptor cysteine-rich domain
11:35456061:T:C	rs61736408	11	35456061	T	C	C	0.4456	1.045	0.934522	1.1685	PAMR1	nonsynonymous SNV	PAMR1:NM_001282676:exon8:c.A1292G:p.Q431R,PAMR1:NM_001001991:exon10:c.A1625G:p.Q542R,PAMR1:NM_015430:exon11:c.A1676G:p.Q559R,PAMR1:NM_001282675:exon12:c.A1505G:p.Q502R	0.1356	0	8.448	5.52	Peptidase S1, PA clan|Serine proteases, trypsin domain;Peptidase S1, PA clan|Sushi/SCR/CCP domain
19:48517538:G:A	rs62129078	19	48517538	G	A	A	0.4464	1.052	0.923707	1.19645	ELSPBP1	nonsynonymous SNV	ELSPBP1:NM_022142:exon3:c.G181A:p.G61S	0.1585	0.61	20.4	1.14	Fibronectin, type II, collagen-binding|Kringle-like fold
2:227954599:G:A	rs2229814	2	227954599	G	A	A	0.4465	1.032	0.950925	1.12111	COL4A4	nonsynonymous SNV	COL4A4:NM_000092:exon21:c.C1444T:p.P482S	0.5025	0	1.217	0.339	.
19:9068374:A:G	rs61732552	19	9068374	A	G	A	0.4469	1.10254	0.855696	1.41884	MUC16	nonsynonymous SNV	MUC16:NM_024690:exon3:c.T19072C:p.S6358P	0.0285	0.064	0.002	-4.79	.
14:23306048:C:T	rs1042703	14	23306048	C	T	T	0.4491	1.045	0.930866	1.17309	MMP14	nonsynonymous SNV	MMP14:NM_004995:exon1:c.C22T:p.P8S	0.8431	0	13.05	2.51	.
19:9071562:C:T	rs116866749	19	9071562	C	T	C	0.4496	1.10254	0.853201	1.42584	MUC16	nonsynonymous SNV	MUC16:NM_024690:exon3:c.G15884A:p.G5295E	0.0285	0.041	0.62	-3.88	.
3:195501149:C:T	rs2259292	3	195501149	C	T	C	0.4503	1.05485	0.919247	1.20949	MUC4	nonsynonymous SNV	MUC4:NM_138297:exon2:c.G110A:p.G37D,MUC4:NM_004532:exon3:c.G263A:p.G88D,MUC4:NM_018406:exon4:c.G12971A:p.G4324D	0.558	0.478	14.7	-2.14	.
19:8160334:G:A	rs12608849	19	8160334	G	A	G	0.4509	1.03627	0.944481	1.13555	FBN3	nonsynonymous SNV	FBN3:NM_001321431:exon46:c.C5710T:p.L1904F,FBN3:NM_032447:exon46:c.C5710T:p.L1904F	0.2668	0.059	7.732	-0.659	EGF-like calcium-binding domain|EGF-like calcium-binding, conserved site|EGF-like domain|Growth factor receptor cysteine-rich domain
12:51723499:T:C	rs17860364	12	51723499	T	C	C	0.4513	1.052	0.921899	1.1988	CELA1	nonsynonymous SNV	CELA1:NM_001971:exon7:c.A728G:p.Q243R	0.1025	0	12.17	5.41	Peptidase S1, PA clan|Serine proteases, trypsin domain
3:100585792:C:T	rs113364496	3	100585792	C	T	T	0.4515	1.152	0.800467	1.65957	ABI3BP	nonsynonymous SNV	ABI3BP:NM_001349329:exon10:c.G940A:p.E314K,ABI3BP:NM_001349330:exon10:c.G940A:p.E314K,ABI3BP:NM_001349331:exon10:c.G940A:p.E314K,ABI3BP:NM_001349332:exon10:c.G940A:p.E314K,ABI3BP:NM_015429:exon10:c.G940A:p.E314K	0.0113	0.999	23.2	5.04	.
13:24465717:A:G	rs3864970	13	24465717	A	G	A	0.4517	1.04275	0.934485	1.16388	C1QTNF9B	nonsynonymous SNV	C1QTNF9B:NM_001007537:exon3:c.T713C:p.V238A	0.32	0	8.952	3.04	C1q domain|Tumour necrosis factor-like domain
7:100637008:C:A	rs202180008	7	100637008	C	A	C	0.4526	1.06724	0.898094	1.26805	MUC12	nonsynonymous SNV	MUC12:NM_001164462:exon2:c.C3164A:p.A1055E	0.1077	.	0.054	-0.314	.
3:194061826:C:T	rs11711157	3	194061826	C	T	C	0.4532	1.0352	0.944481	1.13555	CPN2	nonsynonymous SNV	CPN2:NM_001080513:exon2:c.G1606A:p.V536M,CPN2:NM_001291988:exon2:c.G1606A:p.V536M	0.2819	0.918	15.16	2.79	.
5:33549350:C:G	rs112196098	5	33549350	C	G	G	0.4534	1.089	0.874135	1.35597	ADAMTS12	nonsynonymous SNV	ADAMTS12:NM_001324512:exon19:c.G4009C:p.E1337Q,ADAMTS12:NM_030955:exon21:c.G4264C:p.E1422Q	0.0418	0.301	11.95	4.5	.
5:33549374:G:T	rs77581578	5	33549374	G	T	T	0.4534	1.089	0.874135	1.35597	ADAMTS12	nonsynonymous SNV	ADAMTS12:NM_001324512:exon19:c.C3985A:p.P1329T,ADAMTS12:NM_030955:exon21:c.C4240A:p.P1414T	0.0417	0.835	25.9	5.37	.
7:100637035:A:C	rs200301907	7	100637035	A	C	A	0.4534	1.06724	0.898094	1.26805	MUC12	nonsynonymous SNV	MUC12:NM_001164462:exon2:c.A3191C:p.H1064P	0.1187	.	0.003	-0.819	.
11:102576358:T:C	rs2846707	11	102576358	T	C	T	0.4536	1.03306	0.948152	1.12664	MMP27	nonsynonymous SNV	MMP27:NM_022122:exon1:c.A88G:p.M30V	0.6565	0.002	0.001	0.184	Metallopeptidase, catalytic domain|Peptidoglycan binding-like
1:53535499:C:T	rs17107831	1	53535499	C	T	C	0.4537	1.09409	0.863156	1.38702	PODN	nonsynonymous SNV	PODN:NM_153703:exon2:c.C116T:p.A39V,PODN:NM_001199081:exon3:c.C59T:p.A20V,PODN:NM_001199080:exon4:c.C59T:p.A20V	0.0696	0.009	0.01	-2.79	.
8:120429024:G:A	rs2279112	8	120429024	G	A	G	0.4537	1.03627	0.943574	1.13892	NOV	nonsynonymous SNV	NOV:NM_002514:exon2:c.G125A:p.R42Q	0.2597	0	6.101	-8.39	Growth factor receptor cysteine-rich domain|Insulin-like growth factor-binding protein, IGFBP
8:32453358:G:A	rs3924999	8	32453358	G	A	G	0.4541	1.03306	0.949063	1.12331	NRG1	nonsynonymous SNV	NRG1:NM_001160002:exon2:c.G113A:p.R38Q,NRG1:NM_001160004:exon2:c.G113A:p.R38Q,NRG1:NM_001160005:exon2:c.G113A:p.R38Q,NRG1:NM_001160007:exon2:c.G113A:p.R38Q,NRG1:NM_001160008:exon2:c.G113A:p.R38Q,NRG1:NM_004495:exon2:c.G113A:p.R38Q,NRG1:NM_013956:exon2:c.G113A:p.R38Q,NRG1:NM_013957:exon2:c.G113A:p.R38Q,NRG1:NM_013958:exon2:c.G113A:p.R38Q,NRG1:NM_013960:exon2:c.G113A:p.R38Q,NRG1:NM_013962:exon2:c.G…	0.3739	0.381	26	5.65	Immunoglobulin-like domain;Immunoglobulin-like domain|Immunoglobulin-like fold;Neuregulin, C-terminal
7:44153825:G:A	rs13898	7	44153825	G	A	G	0.4567	1.08932	0.869011	1.36397	AEBP1	nonsynonymous SNV	AEBP1:NM_001129:exon21:c.G3442A:p.V1148I	0.0318	0.002	17.21	4.2	Peptidase M14, carboxypeptidase A
12:9016562:GGC:G	rs144686314	12	9016562	GGC	G	GGC	0.4568	1.08932	0.866477	1.3707	A2ML1	frameshift deletion	A2ML1:NM_001282424:exon18:c.2203_2204del:p.A735fs,A2ML1:NM_144670:exon29:c.3676_3677del:p.A1226fs	0.0518	.	.	.	.
3:195510707:T:G	rs142559357	3	195510707	T	G	G	0.4589	1.204	0.742212	1.95447	MUC4	nonsynonymous SNV	MUC4:NM_018406:exon2:c.A7744C:p.T2582P	0.3408	0.985	1.973	-1.53	.
11:17591922:C:T	rs7112749	11	17591922	C	T	C	0.4592	1.11982	0.827919	1.51413	OTOG	nonsynonymous SNV	OTOG:NM_001277269:exon16:c.C1976T:p.T659M,OTOG:NM_001292063:exon17:c.C1940T:p.T647M	0.0395	.	25.4	4.09	von Willebrand factor, type D domain
19:9059307:C:T	rs12461695	19	9059307	C	T	T	0.4596	1.057	0.913018	1.22507	MUC16	nonsynonymous SNV	MUC16:NM_024690:exon3:c.G28139A:p.G9380D	0.0833	0.502	6.362	0.092	.
19:9059159:T:G	rs12462651	19	9059159	T	G	G	0.4604	1.057	0.913018	1.22507	MUC16	nonsynonymous SNV	MUC16:NM_024690:exon3:c.A28287C:p.K9429N	0.0831	0.478	1.063	-1.81	.
1:175375469:C:A	rs2239819	1	175375469	C	A	A	0.4606	1.035	0.945388	1.1322	TNR	nonsynonymous SNV	TNR:NM_003285:exon3:c.G382T:p.A128S	0.2909	0.01	0.027	2	.
11:17627613:G:C	rs7934079	11	17627613	G	C	G	0.4634	1.05263	0.919211	1.20471	OTOG	nonsynonymous SNV	OTOG:NM_001277269:exon32:c.G4123C:p.A1375P,OTOG:NM_001292063:exon33:c.G4087C:p.A1363P	0.6794	0.001	4.845	3.05	Alpha-L-arabinofuranosidase B, arabinose-binding domain;Uncharacterised domain, cysteine-rich
4:88732874:A:G	rs17013182	4	88732874	A	G	A	0.4639	1.10988	0.836742	1.47144	IBSP	nonsynonymous SNV	IBSP:NM_004967:exon7:c.A766G:p.T256A	0.0255	0.006	10.63	2.77	.
2:189940142:T:G	rs76148000	2	189940142	T	G	G	0.4642	1.093	0.863985	1.38292	COL5A2	nonsynonymous SNV	COL5A2:NM_000393:exon17:c.A1081C:p.M361L	0.0272	0	23.7	5.17	.
11:102398593:C:T	rs10502001	11	102398593	C	T	T	0.4644	1.037	0.941727	1.14115	MMP7	nonsynonymous SNV	MMP7:NM_002423:exon2:c.G230A:p.R77H	0.2395	0.021	9.433	-7.85	Metallopeptidase, catalytic domain|Peptidoglycan binding-like
19:10116508:C:T	rs2303098	19	10116508	C	T	T	0.4649	1.064	0.900685	1.25684	COL5A3	nonsynonymous SNV	COL5A3:NM_015719:exon3:c.G401A:p.R134H	0.1721	0	12.02	0.641	Concanavalin A-like lectin/glucanase domain|Laminin G domain
2:85893741:G:A	rs1130866	2	85893741	G	A	A	0.4663	1.031	0.949975	1.11999	SFTPB	nonsynonymous SNV	SFTPB:NM_000542:exon5:c.C428T:p.T143I,SFTPB:NM_198843:exon5:c.C428T:p.T143I	0.5329	0	0.015	3.33	Saposin B type domain|Saposin B type, region 2|Saposin-like
18:2909700:C:T	rs56288451	18	2909700	C	T	T	0.468	1.073	0.888554	1.29455	EMILIN2	nonsynonymous SNV	EMILIN2:NM_032048:exon7:c.C2707T:p.P903S	0.058	0.325	10.65	1.68	C1q domain
15:89386652:G:A	rs34949187	15	89386652	G	A	A	0.4686	1.04	0.936281	1.15701	ACAN	nonsynonymous SNV	ACAN:NM_001135:exon6:c.G824A:p.R275Q,ACAN:NM_013227:exon6:c.G824A:p.R275Q	0.1693	1	25.6	5.56	C-type lectin fold|C-type lectin-like|Link domain
2:228121101:G:T	rs55703767	2	228121101	G	T	G	0.47	1.03734	0.937142	1.14903	COL4A3	nonsynonymous SNV	COL4A3:NM_000091:exon17:c.G976T:p.D326Y	0.2184	0.244	23	3.01	.
14:70924955:A:C	rs114864695	14	70924955	A	C	A	0.4702	1.05263	0.915614	1.20944	ADAM21	nonsynonymous SNV	ADAM21:NM_003813:exon2:c.A739C:p.K247Q	0.1019	0.005	0.001	-1.13	Metallopeptidase, catalytic domain|Peptidase M12B, ADAM/reprolysin
20:3651765:C:T	rs3918396	20	3651765	C	T	C	0.4702	1.0661	0.893687	1.27176	ADAM33	nonsynonymous SNV	ADAM33:NM_153202:exon18:c.G2050A:p.V684I,ADAM33:NM_001282447:exon19:c.G2128A:p.V710I,ADAM33:NM_025220:exon19:c.G2128A:p.V710I	0.0888	0.114	10.61	3.45	.
6:30954491:C:T	rs34126344	6	30954491	C	T	T	0.4712	1.067	0.896336	1.27054	MUC21	nonsynonymous SNV	MUC21:NM_001010909:exon2:c.C539T:p.A180V	0.0483	0.395	9.83	1.89	Tandem-repeating region of mucin, epiglycanin-like
11:27679916:C:T	rs6265	11	27679916	C	T	C	0.4716	1.0395	0.935345	1.15585	BDNF	nonsynonymous SNV	BDNF:NM_170735:exon1:c.G196A:p.V66M,BDNF:NM_001143805:exon2:c.G196A:p.V66M,BDNF:NM_001143806:exon2:c.G196A:p.V66M,BDNF:NM_001143807:exon2:c.G196A:p.V66M,BDNF:NM_001143808:exon2:c.G196A:p.V66M,BDNF:NM_001143809:exon2:c.G283A:p.V95M,BDNF:NM_001143812:exon2:c.G196A:p.V66M,BDNF:NM_001143813:exon2:c.G196A:p.V66M,BDNF:NM_001143816:exon2:c.G196A:p.V66M,BDNF:NM_001709:exon2:c.G196A:p.V66M,BDNF:NM_170731:…	0.1781	0.999	24.1	5.25	Cystine-knot cytokine|Nerve growth factor-related
7:149522162:G:T	rs62617122	7	149522162	G	T	G	0.4721	1.05374	0.912069	1.21901	SSPO	nonsynonymous SNV	SSPO:NM_198455:exon96:c.G13949T:p.C4650F	0.1676	1	6.771	4.41	.
7:76069811:T:C	rs2906999	7	76069811	T	C	C	0.4728	1.033	0.94535	1.12772	ZP3	nonsynonymous SNV	ZP3:NM_001110354:exon7:c.T943C:p.S315P,ZP3:NM_007155:exon8:c.T790C:p.S264P	0.5261	0	0.001	-7.74	Zona pellucida domain
4:110914427:A:T	rs4698803	4	110914427	A	T	A	0.4733	1.05152	0.918292	1.20351	EGF	nonsynonymous SNV	EGF:NM_001178131:exon18:c.A2633T:p.E878V,EGF:NM_001963:exon19:c.A2759T:p.E920V	0.7942	0	0.019	1.32	EGF-like calcium-binding domain|EGF-like calcium-binding, conserved site|EGF-like domain
5:9050549:T:C	rs34563995	5	9050549	T	C	T	0.4739	1.12994	0.806445	1.58268	SEMA5A	nonsynonymous SNV	SEMA5A:NM_003966:exon21:c.A2866G:p.S956G	0.0182	0.001	21.4	3.74	.
6:30993533:A:G	rs2523898	6	30993533	A	G	A	0.474	1.03413	0.943537	1.13442	MUC22	nonsynonymous SNV	MUC22:NM_001198815:exon3:c.A325G:p.R109G,MUC22:NM_001318484:exon3:c.A334G:p.R112G,MUC22:NM_001322469:exon3:c.A334G:p.R112G	0.5241	.	2.397	1.48	.
3:195497143:C:T	rs2293232	3	195497143	C	T	C	0.4743	1.08342	0.869776	1.34921	MUC4	nonsynonymous SNV	MUC4:NM_138297:exon4:c.G481A:p.A161T,MUC4:NM_004532:exon5:c.G634A:p.A212T,MUC4:NM_018406:exon6:c.G13342A:p.A4448T	0.1571	0.01	20.1	2.73	NIDO domain
7:100638856:A:G	rs76496013	7	100638856	A	G	A	0.4743	1.0352	0.942631	1.13778	MUC12	nonsynonymous SNV	MUC12:NM_001164462:exon2:c.A5012G:p.H1671R	0.7256	.	0.001	-1.4	.
15:90764219:G:A	rs4932305	15	90764219	G	A	A	0.4747	1.043	0.929006	1.17074	SEMA4B	stopgain	SEMA4B:NM_001324029:exon5:c.G257A:p.W86X	0.1379	0	4.378	2.5	Sema domain|WD40/YVTN repeat-like-containing domain
3:194062519:C:T	rs3732477	3	194062519	C	T	C	0.4748	1.03413	0.942594	1.13328	CPN2	nonsynonymous SNV	CPN2:NM_001080513:exon2:c.G913A:p.A305T,CPN2:NM_001291988:exon2:c.G913A:p.A305T	0.284	0.017	0.046	-10.6	Leucine-rich repeat domain, L domain-like
3:122646828:A:G	rs2276774	3	122646828	A	G	G	0.4755	1.042	0.930829	1.16845	SEMA5B	nonsynonymous SNV	SEMA5B:NM_001256348:exon7:c.T485C:p.I162T,SEMA5B:NM_001031702:exon8:c.T659C:p.I220T,SEMA5B:NM_001256346:exon8:c.T659C:p.I220T,SEMA5B:NM_001256347:exon8:c.T821C:p.I274T	0.1396	0.062	11.24	5.64	Sema domain|WD40/YVTN repeat-like-containing domain
6:30994253:G:A	rs28360987	6	30994253	G	A	G	0.4757	1.04932	0.918255	1.19875	MUC22	nonsynonymous SNV	MUC22:NM_001198815:exon3:c.G1045A:p.V349I,MUC22:NM_001318484:exon3:c.G1054A:p.V352I,MUC22:NM_001322469:exon3:c.G1054A:p.V352I	0.1192	.	0.023	-1.05	.
1:230845977:G:A	rs4762	1	230845977	G	A	G	0.4758	1.04712	0.923633	1.18701	AGT	nonsynonymous SNV	AGT:NM_000029:exon2:c.C620T:p.T207M	0.1344	1	24	4.08	Serpin domain
7:12414725:G:A	rs17165936	7	12414725	G	A	G	0.4762	1.04822	0.92094	1.19287	VWDE	stopgain	VWDE:NM_001135924:exon8:c.C1153T:p.R385X,VWDE:NM_001346972:exon8:c.C1153T:p.R385X,VWDE:NM_001346973:exon8:c.C688T:p.R230X	0.0997	.	36	3.78	.
3:124646594:A:G	rs4679392	3	124646594	A	G	A	0.4786	1.03093	0.949025	1.11887	MUC13	nonsynonymous SNV	MUC13:NM_033049:exon2:c.T296C:p.I99T	0.417	0	0.047	1.89	.
2:227892720:C:T	rs2229813	2	227892720	C	T	C	0.4794	1.03093	0.948115	1.12219	COL4A4	nonsynonymous SNV	COL4A4:NM_000092:exon42:c.G3979A:p.V1327M	0.4449	0	14.35	1.6	.
16:58079165:G:A	rs3743563	16	58079165	G	A	A	0.4812	1.038	0.935307	1.15129	MMP15	nonsynonymous SNV	MMP15:NM_002428:exon10:c.G1825A:p.G609R	0.2245	0.092	21.1	3.69	Peptidase M10A, matrix metallopeptidase, C-terminal
8:32505633:G:C	rs35641374	8	32505633	G	C	G	0.4825	1.14416	0.780984	1.67732	NRG1	nonsynonymous SNV	NRG1:NM_001322205:exon1:c.G397C:p.V133L,NRG1:NM_001322206:exon1:c.G397C:p.V133L,NRG1:NM_001322207:exon1:c.G397C:p.V133L,NRG1:NM_013959:exon1:c.G397C:p.V133L	0.0154	0.029	13.04	4.26	Immunoglobulin-like domain
1:209800230:C:T	rs2076349	1	209800230	C	T	T	0.4827	1.09	0.858027	1.3842	LAMB3	nonsynonymous SNV	LAMB3:NM_001017402:exon12:c.G1579A:p.V527M,LAMB3:NM_000228:exon13:c.G1579A:p.V527M,LAMB3:NM_001127641:exon13:c.G1579A:p.V527M	0.0278	0.596	10.99	-2.52	Laminin EGF domain
1:152285861:G:A	rs61816761	1	152285861	G	A	A	0.4831	1.148	0.783331	1.68236	FLG	stopgain	FLG:NM_002016:exon3:c.C1501T:p.R501X	0.0146	.	25.7	-4.4	.
5:168180047:C:T	rs34260167	5	168180047	C	T	C	0.4835	1.1534	0.767451	1.73443	SLIT3	nonsynonymous SNV	SLIT3:NM_001271946:exon18:c.G1886A:p.S629N,SLIT3:NM_003062:exon18:c.G1886A:p.S629N	0.0113	0	22.3	4.46	Leucine-rich repeat domain, L domain-like
15:39880822:A:G	rs2292305	15	39880822	A	G	A	0.4835	1.04603	0.92271	1.18583	THBS1	nonsynonymous SNV	THBS1:NM_003246:exon10:c.A1567G:p.T523A	0.1167	0	0.35	-2.47	.
19:8183871:G:A	rs35579498	19	8183871	G	A	A	0.4837	1.077	0.878236	1.32027	FBN3	nonsynonymous SNV	FBN3:NM_001321431:exon26:c.C3247T:p.R1083W,FBN3:NM_032447:exon26:c.C3247T:p.R1083W	0.0394	0.039	29.6	0.394	EGF-like calcium-binding domain|EGF-like calcium-binding, conserved site|EGF-like domain|Growth factor receptor cysteine-rich domain
2:189931144:A:G	rs35852101	2	189931144	A	G	G	0.4841	1.098	0.848131	1.42293	COL5A2	nonsynonymous SNV	COL5A2:NM_000393:exon23:c.T1535C:p.V512A	0.019	0.231	22.8	5.52	.
7:149521183:G:A	rs4389841	7	149521183	G	A	G	0.4841	1.05263	0.910246	1.21658	SSPO	nonsynonymous SNV	SSPO:NM_198455:exon94:c.G13523A:p.R4508Q	0.1679	0.013	9.94	-7.98	.
7:107677984:G:A	rs1627354	7	107677984	G	A	G	0.4845	1.06383	0.891901	1.26922	LAMB4	nonsynonymous SNV	LAMB4:NM_001318046:exon30:c.C4528T:p.H1510Y,LAMB4:NM_007356:exon30:c.C4528T:p.H1510Y	0.0537	0.917	6.574	2.66	Laminin EGF domain
3:49162284:C:T	rs34759087	3	49162284	C	T	T	0.4848	1.045	0.923596	1.18232	LAMB2	nonsynonymous SNV	LAMB2:NM_002292:exon21:c.G2959A:p.E987K	0.1252	0.704	23.1	4.6	Laminin EGF domain
9:101804366:T:C	rs35901514	9	101804366	T	C	T	0.4852	1.14286	0.781735	1.67237	COL15A1	nonsynonymous SNV	COL15A1:NM_001855:exon24:c.T2551C:p.F851L	0.0169	0.997	24.7	5.92	.
19:10206953:A:G	NA	19	10206953	A	G	G	0.4853	1.16	0.769049	1.75172	ANGPTL6	nonsynonymous SNV	ANGPTL6:NM_001321411:exon2:c.T287C:p.L96P,ANGPTL6:NM_031917:exon2:c.T287C:p.L96P	0.0246	1	32	4.32	.
12:10150961:G:A	rs2273987	12	10150961	G	A	G	0.4854	1.05374	0.9085	1.2238	CLEC1B	nonsynonymous SNV	CLEC1B:NM_016509:exon2:c.C83T:p.S28F	0.0875	0.989	24.6	4.37	.
15:89415247:C:G	rs3817428	15	89415247	C	G	C	0.4856	1.03627	0.938043	1.14564	ACAN	nonsynonymous SNV	ACAN:NM_001135:exon14:c.C7005G:p.D2335E,ACAN:NM_013227:exon15:c.C7119G:p.D2373E	0.2729	0.505	27.6	3.89	C-type lectin|C-type lectin fold|C-type lectin-like
10:72195439:T:C	rs1904589	10	72195439	T	C	C	0.4883	1.03	0.948077	1.11775	NODAL	nonsynonymous SNV	NODAL:NM_001329906:exon2:c.A95G:p.H32R,NODAL:NM_018055:exon2:c.A494G:p.H165R	0.5432	0	0.003	-2.83	.
1:207074905:T:C	rs1150258	1	207074905	T	C	T	0.4887	1.02987	0.948077	1.11775	IL24	nonsynonymous SNV	IL24:NM_001185156:exon5:c.T373C:p.Y125H,IL24:NM_006850:exon5:c.T370C:p.Y124H	0.4654	1	23.9	2.38	Four-helical cytokine, core|Four-helical cytokine-like, core
7:149519184:C:T	rs1008336	7	149519184	C	T	C	0.4894	1.05152	0.911121	1.21298	SSPO	nonsynonymous SNV	SSPO:NM_198455:exon90:c.C12988T:p.R4330C	0.1681	1	10.23	3.57	.
9:92003679:C:T	rs11526468	9	92003679	C	T	T	0.4904	1.032	0.943499	1.12993	SEMA4D	nonsynonymous SNV	SEMA4D:NM_001142287:exon13:c.G979A:p.A327T,SEMA4D:NM_006378:exon13:c.G979A:p.A327T	0.3006	0.997	33	4.03	Sema domain|WD40/YVTN repeat-like-containing domain
1:208391254:C:T	rs2782948	1	208391254	C	T	T	0.4906	1.031	0.945312	1.12327	PLXNA2	nonsynonymous SNV	PLXNA2:NM_025179:exon2:c.G14A:p.R5Q	0.3182	0.883	13.55	5.5	.
10:100219374:T:A	rs10883100	10	100219374	T	A	A	0.4913	1.03	0.947167	1.12107	HPSE2	nonsynonymous SNV	HPSE2:NM_001166245:exon10:c.A1400T:p.Y467F,HPSE2:NM_001166244:exon11:c.A1562T:p.Y521F,HPSE2:NM_021828:exon12:c.A1736T:p.Y579F	0.4937	0.996	13.57	5.31	.
1:236702210:A:G	rs1041937	1	236702210	A	G	G	0.4914	1.032	0.943499	1.12993	LGALS8	nonsynonymous SNV	LGALS8:NM_201544:exon4:c.A166G:p.M56V,LGALS8:NM_006499:exon5:c.A166G:p.M56V,LGALS8:NM_201543:exon5:c.A166G:p.M56V,LGALS8:NM_201545:exon5:c.A166G:p.M56V	0.7252	0	3.187	1.99	Concanavalin A-like lectin/glucanase domain|Galectin, carbohydrate recognition domain
6:76640781:C:T	rs3734313	6	76640781	C	T	T	0.4918	1.039	0.93258	1.15696	IMPG1	nonsynonymous SNV	IMPG1:NM_001282368:exon14:c.G1898A:p.R633H,IMPG1:NM_001563:exon15:c.G2132A:p.R711H	0.1709	0.952	21.4	1.18	EGF-like domain
9:113208250:T:G	rs7863519	9	113208250	T	G	T	0.4923	1.03842	0.933476	1.15355	SVEP1	nonsynonymous SNV	SVEP1:NM_153366:exon26:c.A4330C:p.M1444L	0.1945	0.001	0.201	3.62	Concanavalin A-like lectin/glucanase domain
5:129040056:A:T	rs11749126	5	129040056	A	T	T	0.4924	1.072	0.879889	1.30729	ADAMTS19	nonsynonymous SNV	ADAMTS19:NM_133638:exon21:c.A3284T:p.Y1095F	0.1838	0.058	19.45	4.29	.
18:61233907:C:T	rs61751994	18	61233907	C	T	C	0.4933	1.09649	0.839826	1.43127	SERPINB12	nonsynonymous SNV	SERPINB12:NM_001307928:exon7:c.C941T:p.S314L,SERPINB12:NM_080474:exon7:c.C881T:p.S294L	0.0256	0.267	6.943	-6.95	Serpin domain
7:12409263:C:A	rs17165906	7	12409263	C	A	C	0.4934	1.04603	0.9191	1.19048	VWDE	nonsynonymous SNV	VWDE:NM_001346972:exon10:c.G2324T:p.C775F,VWDE:NM_001346973:exon10:c.G1859T:p.C620F,VWDE:NM_001135924:exon12:c.G2669T:p.C890F	0.1001	1	28.1	4.83	EGF-like domain
19:40196611:C:T	rs35541195	19	40196611	C	T	C	0.4942	1.04384	0.920867	1.18346	LGALS14	nonsynonymous SNV	LGALS14:NM_203471:exon2:c.C64T:p.R22C	0.1185	0.301	18.35	-0.462	Concanavalin A-like lectin/glucanase domain|Galectin, carbohydrate recognition domain
4:79461956:T:C	rs61748814	4	79461956	T	C	C	0.4943	1.103	0.836641	1.45406	FRAS1	nonsynonymous SNV	FRAS1:NM_025074:exon74:c.T11717C:p.I3906T	0.0199	0.561	13.87	6.17	.
7:12409522:A:G	rs3823844	7	12409522	A	G	A	0.4949	1.04603	0.9191	1.19048	VWDE	nonsynonymous SNV	VWDE:NM_001346972:exon10:c.T2065C:p.Y689H,VWDE:NM_001346973:exon10:c.T1600C:p.Y534H,VWDE:NM_001135924:exon12:c.T2410C:p.Y804H	0.1	0	0.001	-9.65	.
10:102743494:G:A	rs41291464	10	102743494	G	A	G	0.4954	1.08342	0.857924	1.36785	SEMA4G	nonsynonymous SNV	SEMA4G:NM_017893:exon14:c.G2138A:p.R713H	0.0323	0.001	14.61	1.08	.
18:61587067:C:T	rs9967382	18	61587067	C	T	T	0.4956	1.036	0.937105	1.14449	SERPINB10	nonsynonymous SNV	SERPINB10:NM_005024:exon5:c.C418T:p.P140S	0.202	0	12.68	2.88	Serpin domain
11:102667446:CA:C	rs17879749	11	102667446	CA	C	C	0.4957	1.171	0.749102	1.83103	MMP1	frameshift deletion	MMP1:NM_001145938:exon4:c.375delT:p.I125fs,MMP1:NM_002421:exon4:c.573delT:p.I191fs	0.0261	.	.	.	.
19:8138054:C:A	rs7257948	19	8138054	C	A	A	0.4961	1.031	0.945312	1.12327	FBN3	nonsynonymous SNV	FBN3:NM_001321431:exon62:c.G7830T:p.E2610D,FBN3:NM_032447:exon62:c.G7830T:p.E2610D	0.5728	0	0.301	-3.82	EGF-like calcium-binding domain|EGF-like calcium-binding, conserved site|EGF-like domain|Growth factor receptor cysteine-rich domain
22:29628260:C:G	rs76367973	22	29628260	C	G	C	0.4971	1.20192	0.701173	2.06061	EMID1	nonsynonymous SNV	EMID1:NM_001267895:exon8:c.C686G:p.P229R,EMID1:NM_133455:exon8:c.C692G:p.P231R	0.0158	1	18.3	3.81	.
7:149528262:C:T	rs10261977	7	149528262	C	T	C	0.4976	1.05042	0.91021	1.21177	SSPO	stopgain	SSPO:NM_198455:exon108:c.C15178T:p.R5060X	0.1616	.	10.71	3.3	Cystine knot, C-terminal
7:107594185:C:T	rs61751041	7	107594185	C	T	C	0.4978	1.10011	0.832502	1.45255	LAMB1	nonsynonymous SNV	LAMB1:NM_002291:exon22:c.G2869A:p.D957N	0.0223	0.06	22.7	3.44	Laminin EGF domain
7:12409327:C:T	rs17165910	7	12409327	C	T	C	0.4981	1.04493	0.918182	1.18929	VWDE	nonsynonymous SNV	VWDE:NM_001346972:exon10:c.G2260A:p.E754K,VWDE:NM_001346973:exon10:c.G1795A:p.E599K,VWDE:NM_001135924:exon12:c.G2605A:p.E869K	0.1004	0.979	20.4	4.83	.
15:89417238:A:G	rs1126823	15	89417238	A	G	A	0.4988	1.03306	0.938906	1.13774	ACAN	nonsynonymous SNV	ACAN:NM_013227:exon17:c.A7499G:p.Q2500R	0.222	0.001	11.06	2.92	Sushi/SCR/CCP domain
20:39990377:G:C	rs61739314	20	39990377	G	C	C	0.4989	1.076	0.872214	1.32673	EMILIN3	nonsynonymous SNV	EMILIN3:NM_052846:exon4:c.C1832G:p.A611G	0.0321	0.988	22.5	4.71	.
5:131411460:T:C	rs25882	5	131411460	T	C	C	0.4991	1.035	0.937105	1.14449	CSF2	nonsynonymous SNV	CSF2:NM_000758:exon4:c.T350C:p.I117T	0.2153	0	3.341	-1.53	Four-helical cytokine, core|Four-helical cytokine-like, core
20:2297790:G:A	rs214814	20	2297790	G	A	G	0.4992	1.0582	0.897951	1.24812	TGM3	nonsynonymous SNV	TGM3:NM_003245:exon6:c.G746A:p.S249N	0.1182	0	0.689	-0.391	Transglutaminase-like
9:116931099:G:A	rs2241671	9	116931099	G	A	A	0.4993	1.03	0.945312	1.12327	COL27A1	nonsynonymous SNV	COL27A1:NM_032888:exon3:c.G1264A:p.A422T	0.4203	0	0.001	-8.53	.
1:20656824:A:G	rs2072752	1	20656824	A	G	A	0.4994	1.03734	0.933476	1.15355	VWA5B1	nonsynonymous SNV	VWA5B1:NM_001039500:exon10:c.A1406G:p.N469S	0.1743	0.002	0.001	-8.42	von Willebrand factor, type A
8:52284560:A:T	rs117752382	8	52284560	A	T	A	0.5	1.17096	0.735268	1.86176	PXDNL	stopgain	PXDNL:NM_144651:exon19:c.T3774A:p.C1258X	0.0134	.	36	-0.901	.
9:117848368:C:T	rs61729478	9	117848368	C	T	T	0.5004	1.125	0.801653	1.57946	TNC	nonsynonymous SNV	TNC:NM_002160:exon3:c.G1642A:p.V548M	0.0173	0.971	13.7	4.13	EGF-like domain|EGF-like domain, extracellular|EGF-like, conserved site
1:152128212:C:G	rs143744326	1	152128212	C	G	C	0.5023	1.0989	0.832502	1.45255	RPTN	nonsynonymous SNV	RPTN:NM_001122965:exon3:c.G1363C:p.D455H	0.0351	0.941	22.2	2.46	.
8:24349417:T:C	rs3736281	8	24349417	T	C	T	0.5032	1.12486	0.793041	1.59342	ADAM7	nonsynonymous SNV	ADAM7:NM_003817:exon14:c.T1358C:p.I453T	0.0106	0.801	23.8	5.68	Disintegrin domain|Disintegrin, conserved site
19:8121096:G:A	rs74959615	19	8121096	G	A	A	0.5034	1.057	0.899677	1.24075	CCL25	nonsynonymous SNV	CCL25:NM_001201359:exon3:c.G134A:p.R45H,CCL25:NM_005624:exon3:c.G134A:p.R45H	0.0789	0	0.003	-7.62	Chemokine interleukin-8-like domain
19:48525466:C:T	rs35700000	19	48525466	C	T	T	0.5034	1.144	0.773368	1.69384	ELSPBP1	nonsynonymous SNV	ELSPBP1:NM_022142:exon6:c.C554T:p.P185L	0.0253	1	31	3.66	Fibronectin, type II, collagen-binding;Fibronectin, type II, collagen-binding|Kringle-like fold
3:13612936:A:G	rs3732666	3	13612936	A	G	G	0.5036	1.043	0.920867	1.18346	FBLN2	nonsynonymous SNV	FBLN2:NM_001004019:exon2:c.A1081G:p.S361G,FBLN2:NM_001165035:exon2:c.A1081G:p.S361G,FBLN2:NM_001998:exon2:c.A1081G:p.S361G	0.205	0	0.21	1.9	.
17:34313612:G:A	rs75238886	17	34313612	G	A	G	0.504	1.08578	0.850441	1.38819	CCL14	nonsynonymous SNV	CCL14:NM_032962:exon1:c.C74T:p.S25F,CCL14:NM_032963:exon1:c.C74T:p.S25F	0.039	0.965	12.72	1.52	.
14:52509063:G:A	rs17831525	14	52509063	G	A	A	0.5041	1.107	0.824482	1.48438	NID2	nonsynonymous SNV	NID2:NM_007361:exon7:c.C1585T:p.P529S	0.0385	0.999	26.9	6.16	G2 nidogen/fibulin G2F|Green fluorescent protein|Green fluorescent protein-like
9:116931445:T:C	rs2808770	9	116931445	T	C	C	0.5045	1.032	0.94071	1.13102	COL27A1	nonsynonymous SNV	COL27A1:NM_032888:exon3:c.T1610C:p.I537T	0.2521	0	1.22	4.51	.
4:15964574:C:T	rs62617788	4	15964574	C	T	T	0.5046	1.099	0.834936	1.44542	FGFBP2	nonsynonymous SNV	FGFBP2:NM_031950:exon1:c.G179A:p.R60H	0.0522	0.008	17.56	0.029	.
19:18497141:T:A	rs1059369	19	18497141	T	A	A	0.5046	1.033	0.938906	1.13774	GDF15	nonsynonymous SNV	GDF15:NM_004864:exon1:c.T142A:p.S48T	0.2377	0.675	3.749	-4.94	.
16:57449687:G:A	rs34379253	16	57449687	G	A	A	0.505	1.075	0.870507	1.32934	CCL17	nonsynonymous SNV	CCL17:NM_002987:exon4:c.G199A:p.V67M	0.0294	0.988	8.322	-7.85	CC chemokine, conserved site|Chemokine interleukin-8-like domain
7:149515775:C:G	rs1557955	7	149515775	C	G	C	0.5055	1.04932	0.911084	1.20819	SSPO	nonsynonymous SNV	SSPO:NM_198455:exon83:c.C11676G:p.C3892W	0.1668	1	10.01	2.12	.
6:52101758:C:T	rs11465553	6	52101758	C	T	C	0.5057	1.06838	0.877253	1.30338	IL17F	nonsynonymous SNV	IL17F:NM_052872:exon3:c.G463A:p.V155I	0.0455	0.994	26.3	5.72	Cystine-knot cytokine
12:10271087:A:C	rs16910526	12	10271087	A	C	A	0.5059	1.05374	0.904042	1.22738	CLEC7A	stopgain	CLEC7A:NM_197950:exon4:c.T477G:p.Y159X,CLEC7A:NM_022570:exon5:c.T576G:p.Y192X,CLEC7A:NM_197947:exon6:c.T714G:p.Y238X	0.0695	.	35	-2.33	C-type lectin|C-type lectin fold|C-type lectin-like
1:153534027:C:T	rs1047325	1	153534027	C	T	C	0.5061	1.06724	0.880663	1.29315	S100A2	nonsynonymous SNV	S100A2:NM_005978:exon3:c.G182A:p.S61N	0.046	0	4.019	-4.58	EF-hand domain|EF-hand domain pair|S100/Calbindin-D9k, conserved site
6:54173355:A:G	rs16885197	6	54173355	A	G	A	0.5061	1.15075	0.755481	1.75488	TINAG	nonsynonymous SNV	TINAG:NM_014464:exon1:c.A7G:p.T3A	0.0101	0	0.116	-0.405	.
20:43348653:G:A	rs33932543	20	43348653	G	A	G	0.5062	1.10742	0.815658	1.50345	WISP2	nonsynonymous SNV	WISP2:NM_001323369:exon2:c.G176A:p.R59Q,WISP2:NM_003881:exon2:c.G176A:p.R59Q,WISP2:NM_001323370:exon3:c.G176A:p.R59Q	0.017	0.768	23.1	3.47	Growth factor receptor cysteine-rich domain|Insulin-like growth factor binding protein, N-terminal, Cys-rich conserved site|Insulin-like growth factor-binding protein, IGFBP
7:100635205:C:T	rs4729631	7	100635205	C	T	C	0.5068	1.0582	0.894438	1.25302	MUC12	nonsynonymous SNV	MUC12:NM_001164462:exon2:c.C1361T:p.A454V	0.0669	.	12.96	.	.
8:11710888:G:C	rs12338	8	11710888	G	C	G	0.5072	1.02881	0.945274	1.11883	CTSB	nonsynonymous SNV	CTSB:NM_001908:exon2:c.C76G:p.L26V,CTSB:NM_147781:exon3:c.C76G:p.L26V,CTSB:NM_147782:exon3:c.C76G:p.L26V,CTSB:NM_147783:exon3:c.C76G:p.L26V,CTSB:NM_147780:exon4:c.C76G:p.L26V	0.3735	0.01	16.4	2.39	Peptidase C1A, propeptide
6:32052444:C:T	rs61995676	6	32052444	C	T	C	0.5077	1.11111	0.81013	1.52281	TNXB	nonsynonymous SNV	TNXB:NM_019105:exon8:c.G3191A:p.R1064H	0.0179	1	23	1.21	Fibronectin type III;Fibronectin type III|Immunoglobulin-like fold
2:71044211:C:T	rs2075221	2	71044211	C	T	C	0.5081	1.02881	0.94622	1.11995	CLEC4F	nonsynonymous SNV	CLEC4F:NM_001258027:exon4:c.G302A:p.R101Q,CLEC4F:NM_001321308:exon4:c.G302A:p.R101Q,CLEC4F:NM_173535:exon4:c.G302A:p.R101Q	0.3798	0.001	2.424	3.88	.
7:107593989:T:C	rs20556	7	107593989	T	C	C	0.5082	1.029	0.94622	1.11995	LAMB1	nonsynonymous SNV	LAMB1:NM_002291:exon22:c.A3065G:p.Q1022R	0.6342	0	0.783	-1.99	Laminin EGF domain
1:230845794:A:G	rs699	1	230845794	A	G	A	0.5083	1.02881	0.945274	1.11883	AGT	nonsynonymous SNV	AGT:NM_000029:exon2:c.T803C:p.M268T	0.4401	0	0.001	-0.372	Serpin domain
12:7842587:C:G	rs2302516	12	7842587	C	G	G	0.5083	1.086	0.85211	1.38547	GDF3	nonsynonymous SNV	GDF3:NM_020634:exon2:c.G982C:p.V328L	0.0342	0.785	21.8	2.27	Cystine-knot cytokine|Transforming growth factor-beta, C-terminal
10:105810400:T:C	rs805722	10	105810400	T	C	T	0.5086	1.03627	0.932543	1.15239	COL17A1	nonsynonymous SNV	COL17A1:NM_000494:exon27:c.A2107G:p.M703V	0.8198	0	0.002	-4.21	.
15:84488636:A:G	rs4483821	15	84488636	A	G	A	0.5089	1.02775	0.947129	1.11664	ADAMTSL3	nonsynonymous SNV	ADAMTSL3:NM_001301110:exon6:c.A437G:p.H146R,ADAMTSL3:NM_207517:exon6:c.A437G:p.H146R	0.4539	0	0.001	-3.36	.
2:189918622:G:A	rs116298748	2	189918622	G	A	A	0.5096	1.093	0.842249	1.41861	COL5A2	nonsynonymous SNV	COL5A2:NM_000393:exon37:c.C2498T:p.P833L	0.0187	0.98	25.9	5.93	.
19:7831628:G:A	rs2277998	19	7831628	G	A	G	0.5097	1.03199	0.94071	1.13102	CLEC4M	nonsynonymous SNV	CLEC4M:NM_001144906:exon4:c.G463A:p.D155N,CLEC4M:NM_001144907:exon4:c.G670A:p.D224N,CLEC4M:NM_001144911:exon4:c.G787A:p.D263N,CLEC4M:NM_001144904:exon5:c.G718A:p.D240N,CLEC4M:NM_001144908:exon5:c.G595A:p.D199N,CLEC4M:NM_014257:exon5:c.G871A:p.D291N,CLEC4M:NM_001144905:exon6:c.G799A:p.D267N,CLEC4M:NM_001144909:exon6:c.G733A:p.D245N,CLEC4M:NM_001144910:exon6:c.G802A:p.D268N	0.3078	0.056	0.005	-5.14	C-type lectin fold;C-type lectin fold|C-type lectin-like;C-type lectin|C-type lectin fold|C-type lectin-like
1:32138045:G:A	rs2228553	1	32138045	G	A	G	0.5102	1.11359	0.80464	1.54243	COL16A1	nonsynonymous SNV	COL16A1:NM_001856:exon47:c.C3077T:p.P1026L	0.0205	0.933	22.7	3.52	.
1:186026474:T:C	rs12129650	1	186026474	T	C	C	0.5105	1.028	0.946182	1.11552	HMCN1	nonsynonymous SNV	HMCN1:NM_031935:exon46:c.T7253C:p.I2418T	0.499	0.918	22.6	4.67	Immunoglobulin I-set|Immunoglobulin subtype 2|Immunoglobulin-like domain|Immunoglobulin-like fold
14:75022271:G:T	rs2304707	14	75022271	G	T	G	0.5108	1.0661	0.879783	1.29186	LTBP2	nonsynonymous SNV	LTBP2:NM_000428:exon4:c.C956A:p.P319Q	0.0493	0.877	0.22	-0.039	.
15:65489128:C:T	rs938952	15	65489128	C	T	C	0.5111	1.04058	0.92441	1.16953	CILP	nonsynonymous SNV	CILP:NM_003613:exon9:c.G3496A:p.G1166S	0.7978	0	0.985	3.46	.
18:61582867:A:G	rs8097425	18	61582867	A	G	G	0.5111	1.034	0.936168	1.14335	SERPINB10	nonsynonymous SNV	SERPINB10:NM_005024:exon2:c.A123G:p.I41M	0.202	0	0.138	5.85	Serpin domain
1:40768344:C:T	rs3737821	1	40768344	C	T	C	0.5113	1.10619	0.814843	1.50194	COL9A2	nonsynonymous SNV	COL9A2:NM_001852:exon30:c.G1741A:p.V581I	0.0308	0.476	8.863	0.495	.
1:152283742:G:T	rs142660239	1	152283742	G	T	G	0.5119	1.13636	0.76948	1.67873	FLG	nonsynonymous SNV	FLG:NM_002016:exon3:c.C3620A:p.S1207Y	0.0253	0.024	20.2	1.06	.
9:113252011:T:C	rs74597491	9	113252011	T	C	T	0.5119	1.0929	0.835671	1.42978	SVEP1	nonsynonymous SNV	SVEP1:NM_153366:exon9:c.A1849G:p.I617V	0.0225	0.958	25.6	4.85	HYR domain
20:23731412:G:A	rs2070856	20	23731412	G	A	A	0.5125	1.048	0.910174	1.20698	CST1	nonsynonymous SNV	CST1:NM_001898:exon1:c.C92T:p.P31L	0.1298	0.003	0.044	-2.91	Cystatin domain
11:1103313:T:G	rs41386948	11	1103313	T	G	T	0.5131	1.20192	0.687564	2.10139	MUC2	nonsynonymous SNV	MUC2:NM_002457:exon47:c.T8063G:p.I2688S	0.0398	.	.	.	.
17:1673276:C:T	rs1136287	17	1673276	C	T	C	0.5133	1.02881	0.943423	1.12102	SERPINF1	nonsynonymous SNV	SERPINF1:NM_001329903:exon3:c.C215T:p.T72M,SERPINF1:NM_002615:exon3:c.C215T:p.T72M	0.626	0.005	6.575	-11.3	Serpin domain
13:39343822:C:T	rs9603422	13	39343822	C	T	C	0.5152	1.04384	0.917264	1.18811	FREM2	nonsynonymous SNV	FREM2:NM_207361:exon4:c.C5518T:p.R1840W	0.116	1	24.1	3.29	Na-Ca exchanger/integrin-beta4
11:1272245:C:T	rs2943511	11	1272245	C	T	C	0.5154	1.06838	0.87466	1.30463	MUC5B	nonsynonymous SNV	MUC5B:NM_002458:exon31:c.C14135T:p.T4712M	0.084	0.987	5.945	-3.31	.
10:54531226:C:T	rs1800451	10	54531226	C	T	C	0.5167	1.10742	0.812467	1.50935	MBL2	nonsynonymous SNV	MBL2:NM_000242:exon1:c.G170A:p.G57E	0.0169	0.994	27.3	3.4	.
6:76633385:C:T	rs3778005	6	76633385	C	T	C	0.5169	1.03413	0.935233	1.1422	IMPG1	nonsynonymous SNV	IMPG1:NM_001282368:exon15:c.G2048A:p.S683N,IMPG1:NM_001563:exon16:c.G2282A:p.S761N	0.2528	0.004	0.003	0.067	.
7:37947164:G:T	rs1802073	7	37947164	G	T	T	0.5173	1.028	0.945274	1.11883	SFRP4	nonsynonymous SNV	SFRP4:NM_003014:exon6:c.C958A:p.P320T	0.3706	0	7.303	3.05	.
6:159660879:C:A	rs386360	6	159660879	C	A	C	0.5183	1.04493	0.914589	1.19397	FNDC1	nonsynonymous SNV	FNDC1:NM_032532:exon14:c.C4511A:p.T1504K	0.8997	0	9.601	3.86	.
12:8278195:G:A	rs117213717	12	8278195	G	A	A	0.5185	1.119	0.79842	1.56693	CLEC4A	nonsynonymous SNV	CLEC4A:NM_016184:exon2:c.G121A:p.G41R,CLEC4A:NM_194450:exon2:c.G121A:p.G41R	0.0103	0.933	15.42	0.236	.
7:100638828:C:T	rs56914801	7	100638828	C	T	C	0.5187	1.0582	0.890048	1.25669	MUC12	nonsynonymous SNV	MUC12:NM_001164462:exon2:c.C4984T:p.P1662S	0.0706	.	0.025	-2.34	.
9:136287582:C:T	rs34024143	9	136287582	C	T	C	0.5195	1.04058	0.919909	1.1776	ADAMTS13	nonsynonymous SNV	ADAMTS13:NM_139025:exon1:c.C19T:p.R7W,ADAMTS13:NM_139026:exon1:c.C19T:p.R7W,ADAMTS13:NM_139027:exon1:c.C19T:p.R7W	0.1281	0	7.668	-6.55	.
12:4554630:A:G	rs11613495	12	4554630	A	G	G	0.5205	1.04	0.9226	1.17182	FGF6	nonsynonymous SNV	FGF6:NM_020996:exon1:c.T107C:p.V36A	0.1533	0	3.645	3.3	.
1:236706862:G:C	rs2243525	1	236706862	G	C	C	0.5221	1.032	0.93703	1.13546	LGALS8	nonsynonymous SNV	LGALS8:NM_201544:exon8:c.G552C:p.R184S,LGALS8:NM_201543:exon9:c.G552C:p.R184S,LGALS8:NM_006499:exon10:c.G678C:p.R226S,LGALS8:NM_201545:exon10:c.G678C:p.R226S	0.7516	0	1.763	-2.97	Concanavalin A-like lectin/glucanase domain;Concanavalin A-like lectin/glucanase domain|Galectin, carbohydrate recognition domain
7:123593764:T:C	rs34633019	7	123593764	T	C	T	0.5223	1.09529	0.827555	1.44959	SPAM1	nonsynonymous SNV	SPAM1:NM_001174044:exon3:c.T140C:p.V47A,SPAM1:NM_001174046:exon3:c.T140C:p.V47A,SPAM1:NM_003117:exon3:c.T140C:p.V47A,SPAM1:NM_153189:exon3:c.T140C:p.V47A,SPAM1:NM_001174045:exon4:c.T140C:p.V47A	0.0211	0.238	0.002	-7.11	Aldolase-type TIM barrel
6:30994025:A:G	NA	6	30994025	A	G	G	0.5225	1.048	0.908391	1.20935	MUC22	nonsynonymous SNV	MUC22:NM_001198815:exon3:c.A817G:p.T273A,MUC22:NM_001318484:exon3:c.A826G:p.T276A,MUC22:NM_001322469:exon3:c.A826G:p.T276A	0.02	.	0.006	0.089	.
1:175046835:C:T	rs41266080	1	175046835	C	T	C	0.5226	1.20627	0.671635	2.16851	TNN	nonsynonymous SNV	TNN:NM_022093:exon2:c.C281T:p.T94M	0.0203	1	25.4	5.51	.
20:23618427:C:T	rs1064039	20	23618427	C	T	T	0.5244	1.033	0.933401	1.14445	CST3	nonsynonymous SNV	CST3:NM_000099:exon1:c.G73A:p.A25T,CST3:NM_001288614:exon1:c.G73A:p.A25T	0.2123	0.003	2.815	-1.62	.
18:29782953:A:G	rs71361372	18	29782953	A	G	A	0.5255	1.10619	0.805316	1.51971	MEP1B	nonsynonymous SNV	MEP1B:NM_001308171:exon6:c.A348G:p.I116M,MEP1B:NM_005925:exon6:c.A348G:p.I116M	0.0168	1	25	1.22	Metallopeptidase, catalytic domain|Peptidase M12A, astacin|Peptidase, metallopeptidase
6:46806766:G:A	rs115391170	6	46806766	G	A	A	0.5262	1.082	0.850373	1.37724	MEP1A	nonsynonymous SNV	MEP1A:NM_005588:exon14:c.G2134A:p.V712M	0.028	0	2.73	-2.62	.
10:70856963:C:G	rs67852477	10	70856963	C	G	G	0.5267	1.124	0.786848	1.60596	SRGN	nonsynonymous SNV	SRGN:NM_002727:exon2:c.C203G:p.P68R,SRGN:NM_001321053:exon3:c.C203G:p.P68R	0.0255	0.138	20.6	0.242	.
9:119028233:A:C	rs117124330	9	119028233	A	C	C	0.5274	1.106	0.813247	1.50489	PAPPA	nonsynonymous SNV	PAPPA:NM_002581:exon8:c.A2830C:p.S944R	0.0147	0.985	17.57	2.88	.
7:123599845:A:T	rs75168651	7	123599845	A	T	A	0.5288	1.10011	0.814745	1.48421	SPAM1	nonsynonymous SNV	SPAM1:NM_001174044:exon5:c.A1352T:p.D451V,SPAM1:NM_001174046:exon5:c.A1352T:p.D451V,SPAM1:NM_003117:exon5:c.A1352T:p.D451V,SPAM1:NM_153189:exon5:c.A1352T:p.D451V,SPAM1:NM_001174045:exon6:c.A1352T:p.D451V	0.0143	0.179	3.006	-4.83	.
14:52534758:C:G	rs61734508	14	52534758	C	G	C	0.53	1.09529	0.822703	1.45814	NID2	nonsynonymous SNV	NID2:NM_007361:exon2:c.G352C:p.G118R	0.0247	1	34	4.68	NIDO domain
4:76955914:T:C	rs6532111	4	76955914	T	C	C	0.5312	1.027	0.945237	1.1144	CXCL11	nonsynonymous SNV	CXCL11:NM_001302123:exon4:c.A313G:p.S105G	0.5385	.	.	.	.
16:77401545:A:G	rs11643211	16	77401545	A	G	A	0.5337	1.02987	0.93793	1.13211	ADAMTS18	nonsynonymous SNV	ADAMTS18:NM_199355:exon4:c.T571C:p.Y191H	0.2603	0.599	19.87	4.72	Peptidase M12B, propeptide
19:8987218:G:T	rs3764556	19	8987218	G	T	G	0.5338	1.02987	0.938831	1.12876	MUC16	nonsynonymous SNV	MUC16:NM_024690:exon68:c.C41869A:p.Q13957K	0.2881	0.071	17.15	1.37	SEA domain
12:10167277:G:C	rs637790	12	10167277	G	C	G	0.5347	1.04932	0.900433	1.22248	CLEC12B	nonsynonymous SNV	CLEC12B:NM_001129998:exon3:c.G346C:p.V116L,CLEC12B:NM_001319241:exon3:c.G37C:p.V13L,CLEC12B:NM_001319242:exon3:c.G37C:p.V13L,CLEC12B:NM_205852:exon3:c.G346C:p.V116L	0.9173	0	0.561	3.14	C-type lectin fold|Ly49-like, N-terminal
3:195511783:A:G	rs75997030	3	195511783	A	G	A	0.5348	1.0846	0.837177	1.40455	MUC4	nonsynonymous SNV	MUC4:NM_018406:exon2:c.T6668C:p.I2223T	0.1214	0.012	0.032	.	.
5:158743788:C:A	rs3213119	5	158743788	C	A	C	0.5354	1.07875	0.847826	1.37311	IL12B	nonsynonymous SNV	IL12B:NM_002187:exon7:c.G892T:p.V298F	0.0288	0.978	29	5.7	Fibronectin type III|Immunoglobulin-like fold
7:149516881:G:T	rs1005603	7	149516881	G	T	G	0.5354	1.04493	0.907447	1.20336	SSPO	nonsynonymous SNV	SSPO:NM_198455:exon85:c.G12083T:p.S4028I	0.1669	1	13.95	3.11	.
1:152192549:T:G	rs12145941	1	152192549	T	G	G	0.5365	1.067	0.868663	1.31101	HRNR	nonsynonymous SNV	HRNR:NM_001009931:exon3:c.A1556C:p.Q519P	0.0711	0.94	0.04	0.586	.
6:160952838:G:A	rs3124784	6	160952838	G	A	A	0.5367	1.032	0.935195	1.13769	LPA	nonsynonymous SNV	LPA:NM_005577:exon40:c.C6046T:p.R2016C	0.2782	1	26.3	3.02	Kringle|Kringle, conserved site|Kringle-like fold
20:43804522:A:C	rs2664581	20	43804522	A	C	C	0.5378	1.033	0.931574	1.14669	PI3	nonsynonymous SNV	PI3:NM_002638:exon2:c.A100C:p.T34P	0.1844	0.018	0.008	-5.09	.
3:195511331:A:G	rs56359992	3	195511331	A	G	G	0.5383	1.038	0.920756	1.16948	MUC4	nonsynonymous SNV	MUC4:NM_018406:exon2:c.T7120C:p.S2374P	0.6935	0.077	0.058	.	.
1:22150118:C:T	rs1138469	1	22150118	C	T	T	0.5403	1.055	0.890012	1.25172	HSPG2	nonsynonymous SNV	HSPG2:NM_001291860:exon96:c.G12997A:p.V4333I,HSPG2:NM_005529:exon96:c.G12994A:p.V4332I	0.0605	0.001	0.552	-8.58	Concanavalin A-like lectin/glucanase domain|Laminin G domain
3:195506282:A:C	rs199896027	3	195506282	A	C	C	0.5409	1.057	0.88568	1.26036	MUC4	nonsynonymous SNV	MUC4:NM_018406:exon2:c.T12169G:p.L4057V	0.0136	0.659	0.003	.	.
1:238050081:T:C	rs36017138	1	238050081	T	C	T	0.5413	1.1325	0.753761	1.70349	ZP4	nonsynonymous SNV	ZP4:NM_021186:exon6:c.A829G:p.S277G	0.0107	0.84	25	4.96	Zona pellucida domain
3:195506281:A:G	rs201679145	3	195506281	A	G	G	0.5418	1.056	0.88568	1.26036	MUC4	nonsynonymous SNV	MUC4:NM_018406:exon2:c.T12170C:p.L4057S	0.0111	0.659	0.008	.	.
18:57000469:T:A	rs2298711	18	57000469	T	A	T	0.5418	1.04058	0.91631	1.18223	LMAN1	nonsynonymous SNV	LMAN1:NM_005570:exon11:c.A1228T:p.M410L	0.1369	0	10.21	-1.14	.
11:1272754:A:G	rs3021156	11	1272754	A	G	A	0.5421	1.0661	0.867795	1.3097	MUC5B	nonsynonymous SNV	MUC5B:NM_002458:exon31:c.A14644G:p.T4882A	0.0828	0.068	1.357	-1.72	.
14:70925501:G:C	rs72735760	14	70925501	G	C	G	0.5432	1.06724	0.86357	1.31874	ADAM21	nonsynonymous SNV	ADAM21:NM_003813:exon2:c.G1285C:p.E429Q	0.0479	0.051	0.298	1.38	Disintegrin domain
4:79507418:C:T	rs41278059	4	79507418	C	T	C	0.5447	1.1236	0.767053	1.6474	ANXA3	nonsynonymous SNV	ANXA3:NM_005139:exon6:c.C317T:p.A106V	0.0125	0	13.46	2.59	.
6:30995786:A:G	rs12526820	6	30995786	A	G	A	0.5449	1.09529	0.81468	1.4725	MUC22	nonsynonymous SNV	MUC22:NM_001198815:exon3:c.A2578G:p.T860A,MUC22:NM_001318484:exon3:c.A2587G:p.T863A,MUC22:NM_001322469:exon3:c.A2587G:p.T863A	0.0175	.	0.015	-1.75	.
8:32611970:G:T	rs74942016	8	32611970	G	T	G	0.5449	1.06045	0.875395	1.28541	NRG1	nonsynonymous SNV	NRG1:NM_001159996:exon4:c.G319T:p.V107L,NRG1:NM_001322197:exon4:c.G310T:p.V104L,NRG1:NM_001322202:exon4:c.G7T:p.V3L,NRG1:NM_001322201:exon5:c.G7T:p.V3L,NRG1:NM_001322205:exon5:c.G961T:p.V321L,NRG1:NM_001322206:exon5:c.G961T:p.V321L,NRG1:NM_001322207:exon5:c.G961T:p.V321L,NRG1:NM_001160004:exon8:c.G772T:p.V258L,NRG1:NM_001160008:exon8:c.G772T:p.V258L,NRG1:NM_013957:exon8:c.G772T:p.V258L,NRG1:NM_01…	0.0398	0.979	29.6	5.62	EGF-like domain|EGF-like, conserved site;Neuregulin, C-terminal
9:136310908:C:T	rs685523	9	136310908	C	T	C	0.5458	1.05374	0.887382	1.25292	ADAMTS13	nonsynonymous SNV	ADAMTS13:NM_139025:exon21:c.C2699T:p.A900V,ADAMTS13:NM_139026:exon21:c.C2606T:p.A869V,ADAMTS13:NM_139027:exon21:c.C2699T:p.A900V	0.1019	0	3.365	4.55	.
14:94849201:C:T	rs709932	14	94849201	C	T	T	0.5461	1.035	0.925223	1.15687	SERPINA1	nonsynonymous SNV	SERPINA1:NM_000295:exon2:c.G374A:p.R125H,SERPINA1:NM_001002235:exon2:c.G374A:p.R125H,SERPINA1:NM_001127700:exon2:c.G374A:p.R125H,SERPINA1:NM_001127702:exon3:c.G374A:p.R125H,SERPINA1:NM_001127706:exon3:c.G374A:p.R125H,SERPINA1:NM_001127707:exon3:c.G374A:p.R125H,SERPINA1:NM_001002236:exon4:c.G374A:p.R125H,SERPINA1:NM_001127701:exon4:c.G374A:p.R125H,SERPINA1:NM_001127703:exon4:c.G374A:p.R125H,SERPIN…	0.156	0	0.19	-2.82	Serpin domain
3:186395572:A:T	rs1042464	3	186395572	A	T	T	0.5462	1.027	0.941539	1.11878	HRG	nonsynonymous SNV	HRG:NM_000412:exon7:c.A1478T:p.N493I	0.4784	0	8.629	4.57	.
12:40820208:G:A	rs11176575	12	40820208	G	A	A	0.5465	1.027	0.942481	1.1199	MUC19	.	.	0.4387	.	.	.	.
2:85895338:T:G	rs2077079	2	85895338	T	G	T	0.5471	1.02775	0.939733	1.12542	SFTPB	nonsynonymous SNV	SFTPB:NM_000542:exon2:c.A5C:p.H2P,SFTPB:NM_198843:exon2:c.A5C:p.H2P	0.3791	0	0.006	2.47	.
6:159655084:C:G	rs420054	6	159655084	C	G	C	0.5471	1.04167	0.91185	1.19039	FNDC1	nonsynonymous SNV	FNDC1:NM_032532:exon11:c.C3540G:p.D1180E	0.8995	0	14	2.74	.
2:216236712:T:C	rs17449032	2	216236712	T	C	T	0.5482	1.0917	0.81703	1.45948	FN1	nonsynonymous SNV	FN1:NM_212474:exon38:c.A5731G:p.I1911V,FN1:NM_212476:exon38:c.A6091G:p.I2031V,FN1:NM_001306130:exon39:c.A6004G:p.I2002V,FN1:NM_001306131:exon39:c.A5998G:p.I2000V,FN1:NM_001306132:exon39:c.A5923G:p.I1975V,FN1:NM_002026:exon40:c.A6268G:p.I2090V,FN1:NM_212478:exon40:c.A6193G:p.I2065V,FN1:NM_212482:exon40:c.A6634G:p.I2212V,FN1:NM_001306129:exon41:c.A6541G:p.I2181V	0.0186	0.945	15.03	4.82	Fibronectin type III|Immunoglobulin-like fold;Fibronectin, type I
5:126732427:G:A	rs3812054	5	126732427	G	A	G	0.5487	1.03734	0.918953	1.17178	MEGF10	nonsynonymous SNV	MEGF10:NM_001256545:exon6:c.G616A:p.V206I,MEGF10:NM_001308121:exon6:c.G616A:p.V206I,MEGF10:NM_001308119:exon7:c.G616A:p.V206I,MEGF10:NM_032446:exon7:c.G616A:p.V206I	0.1427	0.001	6.54	0.787	EGF-like domain
3:13670536:A:G	rs9843344	3	13670536	A	G	G	0.549	1.027	0.941539	1.11878	FBLN2	nonsynonymous SNV	FBLN2:NM_001998:exon11:c.A2560G:p.T854A,FBLN2:NM_001004019:exon12:c.A2701G:p.T901A,FBLN2:NM_001165035:exon12:c.A2701G:p.T901A	0.663	0	0.054	-4.23	EGF-like calcium-binding domain|EGF-like calcium-binding, conserved site|EGF-like domain|Growth factor receptor cysteine-rich domain;EGF-like calcium-binding domain|Growth factor receptor cysteine-rich domain
5:82815170:A:G	rs61749613	5	82815170	A	G	A	0.5499	1.06383	0.86776	1.30453	VCAN	nonsynonymous SNV	VCAN:NM_001164098:exon7:c.A1045G:p.K349E,VCAN:NM_004385:exon7:c.A1045G:p.K349E	0.0356	0.694	23.5	5.64	C-type lectin fold|C-type lectin-like
3:9976159:A:G	rs279552	3	9976159	A	G	G	0.55	1.125	0.760332	1.66529	CRELD1	nonsynonymous SNV	CRELD1:NM_015513:exon1:c.A37G:p.M13V,CRELD1:NM_001031717:exon2:c.A37G:p.M13V,CRELD1:NM_001077415:exon2:c.A37G:p.M13V	0.9883	0	0.002	0.328	.
20:23421101:G:A	rs17757442	20	23421101	G	A	G	0.5504	1.04822	0.897771	1.22365	CSTL1	nonsynonymous SNV	CSTL1:NM_138283:exon2:c.G197A:p.R66K	0.0789	0	0.035	3.59	Cystatin domain
11:1265422:G:A	rs199749553	11	1265422	G	A	A	0.5505	1.047	0.900397	1.21765	MUC5B	nonsynonymous SNV	MUC5B:NM_002458:exon31:c.G7312A:p.E2438K	0.1645	0.898	6.611	0.638	.
3:50339622:C:T	rs116482870	3	50339622	C	T	C	0.5508	1.05374	0.886495	1.25167	HYAL1	nonsynonymous SNV	HYAL1:NM_033159:exon2:c.G766A:p.G256R,HYAL1:NM_153282:exon2:c.G766A:p.G256R,HYAL1:NM_153283:exon2:c.G220A:p.G74R,HYAL1:NM_153281:exon4:c.G766A:p.G256R	0.0608	0.009	14.2	2.66	Aldolase-type TIM barrel|Glycoside hydrolase superfamily
14:73735366:C:T	rs4903104	14	73735366	C	T	C	0.5508	1.03306	0.92882	1.14779	PAPLN	nonsynonymous SNV	PAPLN:NM_173462:exon25:c.C3521T:p.T1174M	0.1962	1	34	5.01	Immunoglobulin I-set|Immunoglobulin subtype 2|Immunoglobulin-like domain|Immunoglobulin-like fold
6:30899524:T:C	rs3131787	6	30899524	T	C	T	0.5518	1.04275	0.907411	1.19861	SFTA2	nonsynonymous SNV	SFTA2:NM_205854:exon2:c.A110G:p.N37S	0.2012	0.408	12.85	2.96	.
1:22181895:C:T	rs2229475	1	22181895	C	T	C	0.5522	1.05485	0.88391	1.25785	HSPG2	nonsynonymous SNV	HSPG2:NM_001291860:exon47:c.G5902A:p.V1968I,HSPG2:NM_005529:exon47:c.G5899A:p.V1967I	0.0564	0.998	24.3	5.12	Immunoglobulin I-set|Immunoglobulin-like domain|Immunoglobulin-like fold
11:1271218:GCCA:G	rs199629887	11	1271218	GCCA	G	GCCA	0.5522	1.06496	0.86523	1.31096	MUC5B	nonframeshift deletion	MUC5B:NM_002458:exon31:c.13109_13111del:p.4370_4371del	0.0807	.	.	.	.
6:159655383:A:G	rs2501176	6	159655383	A	G	A	0.5526	1.04167	0.910938	1.1892	FNDC1	nonsynonymous SNV	FNDC1:NM_032532:exon11:c.A3839G:p.Q1280R	0.8991	0	0.002	-3.37	.
1:236175327:C:A	rs3738531	1	236175327	C	A	A	0.553	1.043	0.908319	1.19981	NID1	nonsynonymous SNV	NID1:NM_002508:exon12:c.G2421T:p.Q807H	0.1125	0.953	23.1	3.58	EGF-like calcium-binding domain|EGF-like calcium-binding, conserved site|EGF-like domain|Growth factor receptor cysteine-rich domain
1:160920441:A:G	rs79889663	1	160920441	A	G	G	0.5535	1.05	0.892544	1.23575	ITLN2	nonsynonymous SNV	ITLN2:NM_080878:exon5:c.T502C:p.S168P	0.0524	0.92	23.5	-2.59	Fibrinogen, alpha/beta/gamma chain, C-terminal globular domain
11:1263523:G:A	rs1541314	11	1263523	G	A	G	0.5536	1.06383	0.866061	1.30709	MUC5B	nonsynonymous SNV	MUC5B:NM_002458:exon31:c.G5413A:p.G1805S	0.0818	0.817	10.54	1.15	WxxW domain
11:17615203:G:A	rs11024333	11	17615203	G	A	G	0.5536	1.0395	0.915395	1.18105	OTOG	nonsynonymous SNV	OTOG:NM_001277269:exon26:c.G3224A:p.R1075Q,OTOG:NM_001292063:exon27:c.G3188A:p.R1063Q	0.1605	0.064	10.55	-3.42	von Willebrand factor, type D domain
6:159654551:C:G	rs370434	6	159654551	C	G	C	0.5539	1.04167	0.910938	1.1892	FNDC1	nonsynonymous SNV	FNDC1:NM_032532:exon11:c.C3007G:p.Q1003E	0.8999	0	0.007	1.71	.
2:183731193:C:A	rs36077496	2	183731193	C	A	C	0.554	1.08225	0.830606	1.41001	FRZB	nonsynonymous SNV	FRZB:NM_001463:exon1:c.G88T:p.A30S	0.0406	0.899	15.71	3.88	Frizzled domain
9:117848394:T:C	rs1757095	9	117848394	T	C	C	0.5545	1.053	0.886495	1.25167	TNC	nonsynonymous SNV	TNC:NM_002160:exon3:c.A1616G:p.Q539R	0.9417	0.001	0.001	0.114	EGF-like domain|EGF-like domain, extracellular
19:17108135:C:T	rs3745340	19	17108135	C	T	T	0.5548	1.037	0.918953	1.17178	CPAMD8	nonsynonymous SNV	CPAMD8:NM_015692:exon11:c.G1022A:p.R341Q	0.3555	0.001	17.62	-3.79	.
3:49166460:C:T	rs61729152	3	49166460	C	T	T	0.5551	1.09	0.820206	1.44802	LAMB2	nonsynonymous SNV	LAMB2:NM_002292:exon13:c.G1724A:p.R575Q	0.0192	0.002	1.345	-1.88	Laminin IV type B
6:159655326:T:C	rs3003174	6	159655326	T	C	T	0.5553	1.04058	0.910938	1.1892	FNDC1	nonsynonymous SNV	FNDC1:NM_032532:exon11:c.T3782C:p.L1261P	0.8996	0	0.691	-5.97	.
19:8176890:C:G	rs76318007	19	8176890	C	G	G	0.5558	1.137	0.744264	1.73561	FBN3	nonsynonymous SNV	FBN3:NM_001321431:exon31:c.G3932C:p.G1311A,FBN3:NM_032447:exon31:c.G3932C:p.G1311A	0.0156	1	25.6	4.34	EGF-like calcium-binding domain|EGF-like domain|EGF-like, conserved site|Growth factor receptor cysteine-rich domain
11:46745003:C:T	rs5896	11	46745003	C	T	T	0.5562	1.036	0.921641	1.16602	F2	nonsynonymous SNV	F2:NM_000506:exon6:c.C494T:p.T165M,F2:NM_001311257:exon6:c.C446T:p.T149M	0.1444	0.253	13.57	3.02	Kringle|Kringle, conserved site|Kringle-like fold
3:15499713:T:C	rs6782980	3	15499713	T	C	T	0.5564	1.12994	0.747097	1.7084	COLQ	nonsynonymous SNV	COLQ:NM_080539:exon12:c.A832G:p.S278G,COLQ:NM_005677:exon13:c.A934G:p.S312G,COLQ:NM_080538:exon13:c.A904G:p.S302G	0.0139	0.007	14.32	2.26	.
15:79224727:T:C	rs78155742	15	79224727	T	C	C	0.5566	1.079	0.839558	1.38664	CTSH	nonsynonymous SNV	CTSH:NM_004390:exon6:c.A479G:p.K160R	0.0303	0.236	20.7	3.57	Peptidase C1A, papain C-terminal
18:334994:A:G	rs2305025	18	334994	A	G	A	0.5568	1.03093	0.929712	1.1444	COLEC12	nonsynonymous SNV	COLEC12:NM_130386:exon6:c.T1564C:p.S522P	0.6323	0	8.943	2.81	.
15:89401109:A:G	rs4932439	15	89401109	A	G	G	0.5571	1.034	0.925223	1.15687	ACAN	nonsynonymous SNV	ACAN:NM_001135:exon12:c.A5293G:p.I1765V,ACAN:NM_013227:exon12:c.A5293G:p.I1765V	0.8056	0.007	0.008	1.82	.
1:209791929:G:T	rs2076222	1	209791929	G	T	T	0.5584	1.08	0.835471	1.39621	LAMB3	nonsynonymous SNV	LAMB3:NM_001017402:exon18:c.C2777A:p.A926D,LAMB3:NM_000228:exon19:c.C2777A:p.A926D,LAMB3:NM_001127641:exon19:c.C2777A:p.A926D	0.0239	0.999	24.5	4.1	.
12:15035081:T:C	rs4236	12	15035081	T	C	T	0.5592	1.02564	0.941539	1.11878	MGP	nonsynonymous SNV	MGP:NM_000900:exon4:c.A304G:p.T102A,MGP:NM_001190839:exon5:c.A379G:p.T127A	0.3641	0	0.002	0.156	.
11:1272709:G:A	rs3021155	11	1272709	G	A	G	0.5595	1.06383	0.864365	1.30965	MUC5B	nonsynonymous SNV	MUC5B:NM_002458:exon31:c.G14599A:p.A4867T	0.0822	0.889	3.029	-0.459	.
1:38079517:T:G	rs36043533	1	38079517	T	G	T	0.5597	1.05708	0.876201	1.27655	RSPO1	nonsynonymous SNV	RSPO1:NM_001242908:exon6:c.A484C:p.K162Q,RSPO1:NM_001242909:exon6:c.A403C:p.K135Q,RSPO1:NM_001038633:exon7:c.A484C:p.K162Q	0.0525	0.589	23.8	5.42	Growth factor receptor cysteine-rich domain
1:209797253:T:C	rs2229466	1	209797253	T	C	C	0.56	1.08	0.835471	1.39621	LAMB3	nonsynonymous SNV	LAMB3:NM_001017402:exon14:c.A2069G:p.N690S,LAMB3:NM_000228:exon15:c.A2069G:p.N690S,LAMB3:NM_001127641:exon15:c.A2069G:p.N690S	0.0239	0.003	0.003	2.02	.
14:94936110:G:A	rs45438398	14	94936110	G	A	G	0.56	1.03734	0.917154	1.17407	SERPINA9	nonsynonymous SNV	SERPINA9:NM_001042518:exon2:c.C122T:p.P41L,SERPINA9:NM_175739:exon2:c.C122T:p.P41L	0.1132	0.024	18.85	-1.2	Serpin domain
1:20662938:A:G	rs10916769	1	20662938	A	G	A	0.5609	1.03093	0.929712	1.1444	VWA5B1	nonsynonymous SNV	VWA5B1:NM_001039500:exon13:c.A1901G:p.K634R	0.1849	0.013	0.089	-2.08	.
3:130116696:A:C	rs12488457	3	130116696	A	C	C	0.5614	1.028	0.936955	1.12651	COL6A5	nonsynonymous SNV	COL6A5:NM_001278298:exon9:c.A3838C:p.T1280P,COL6A5:NM_153264:exon9:c.A3838C:p.T1280P	0.7447	0.995	23.2	3.97	von Willebrand factor, type A
4:1165131:C:T	rs193114328	4	1165131	C	T	T	0.5615	1.152	0.717947	1.84663	SPON2	nonsynonymous SNV	SPON2:NM_012445:exon3:c.G364A:p.A122T,SPON2:NM_001128325:exon4:c.G364A:p.A122T,SPON2:NM_001199021:exon5:c.G364A:p.A122T	0.0205	0.37	20.2	2.44	Spondin, N-terminal
6:76660551:G:C	rs3734311	6	76660551	G	C	G	0.5615	1.02669	0.939695	1.12098	IMPG1	nonsynonymous SNV	IMPG1:NM_001282368:exon12:c.C1318G:p.H440D,IMPG1:NM_001563:exon13:c.C1552G:p.H518D	0.383	0	0.027	1.48	.
1:186134246:A:T	rs41317507	1	186134246	A	T	A	0.5619	1.10497	0.78581	1.55432	HMCN1	nonsynonymous SNV	HMCN1:NM_031935:exon98:c.A15260T:p.D5087V	0.0133	0.891	25	5.27	G2 nidogen/fibulin G2F
5:139231255:C:T	rs75431091	5	139231255	C	T	T	0.5619	1.059	0.873646	1.28284	NRG2	nonsynonymous SNV	NRG2:NM_001184935:exon7:c.G1508A:p.R503H,NRG2:NM_004883:exon9:c.G1706A:p.R569H,NRG2:NM_013981:exon9:c.G1688A:p.R563H,NRG2:NM_013982:exon10:c.G1730A:p.R577H,NRG2:NM_013983:exon10:c.G1712A:p.R571H	0.0471	0.291	22.9	4.43	EGF-like domain;Neuregulin, C-terminal
20:13251316:T:C	rs77255807	20	13251316	T	C	C	0.562	1.069	0.855183	1.33702	ISM1	nonsynonymous SNV	ISM1:NM_080826:exon2:c.T304C:p.S102P	0.0275	0.966	22.2	5.5	.
19:10204175:G:A	rs147149731	19	10204175	G	A	A	0.5627	1.101	0.798165	1.51807	ANGPTL6	nonsynonymous SNV	ANGPTL6:NM_001321411:exon5:c.C1072T:p.R358C,ANGPTL6:NM_031917:exon5:c.C1072T:p.R358C	0.0174	0.173	22.6	2.3	Fibrinogen, alpha/beta/gamma chain, C-terminal globular domain|Fibrinogen, alpha/beta/gamma chain, C-terminal globular, subdomain 1
6:6152137:C:G	rs5988	6	6152137	C	G	G	0.5629	1.03	0.933327	1.13542	F13A1	nonsynonymous SNV	F13A1:NM_000129:exon14:c.G1954C:p.E652Q	0.2246	.	17.64	4.5	Immunoglobulin-like fold|Transglutaminase, C-terminal
6:74516631:G:A	rs35630075	6	74516631	G	A	G	0.5633	1.08578	0.818534	1.43942	CD109	nonsynonymous SNV	CD109:NM_001159588:exon24:c.G2794A:p.V932M,CD109:NM_001159587:exon25:c.G3025A:p.V1009M,CD109:NM_133493:exon25:c.G3025A:p.V1009M	0.0222	1	28.7	4.62	Alpha-2-macroglobulin, thiol-ester bond-forming|Terpenoid cyclases/protein prenyltransferase alpha-alpha toroid;Alpha-macroglobulin complement component|Terpenoid cyclases/protein prenyltransferase alpha-alpha toroid
19:8962389:G:A	rs72999925	19	8962389	G	A	G	0.5633	1.0627	0.863501	1.30834	MUC16	nonsynonymous SNV	MUC16:NM_024690:exon82:c.C43310T:p.S14437F	0.0426	0.998	23.5	3.79	SEA domain
19:41858921:G:A	rs1800470	19	41858921	G	A	G	0.564	1.02669	0.939695	1.12098	TGFB1	nonsynonymous SNV	TGFB1:NM_000660:exon1:c.C29T:p.P10L	0.6091	.	18.03	1.45	.
1:153410822:C:A	rs10888561	1	153410822	C	A	A	0.5641	1.028	0.936955	1.12651	S100A7L2	nonsynonymous SNV	S100A7L2:NM_001045479:exon2:c.G17T:p.G6V	0.7553	.	20.6	-1.48	EF-hand domain pair
7:107689844:G:T	rs10260756	7	107689844	G	T	T	0.5641	1.117	0.769973	1.62158	LAMB4	nonsynonymous SNV	LAMB4:NM_001318046:exon27:c.C4049A:p.T1350N,LAMB4:NM_007356:exon27:c.C4049A:p.T1350N	0.0105	0.108	0.436	3.06	Laminin EGF domain
6:65301504:A:G	rs624851	6	65301504	A	G	A	0.565	1.02564	0.939695	1.12098	EYS	nonsynonymous SNV	EYS:NM_001142800:exon26:c.T4256C:p.L1419S,EYS:NM_001292009:exon26:c.T4256C:p.L1419S	0.6844	0.01	0.002	0.375	.
6:129635800:G:A	rs2306942	6	129635800	G	A	G	0.5651	1.05932	0.869393	1.2917	LAMA2	nonsynonymous SNV	LAMA2:NM_000426:exon24:c.G3412A:p.V1138M,LAMA2:NM_001079823:exon24:c.G3412A:p.V1138M	0.0398	0.018	20.9	4.72	Laminin EGF domain
10:99531571:C:G	rs11815012	10	99531571	C	G	G	0.5657	1.033	0.923375	1.15456	SFRP5	nonsynonymous SNV	SFRP5:NM_003015:exon1:c.G20C:p.G7A	0.8344	.	0.003	.	.
5:121413208:C:T	rs1800449	5	121413208	C	T	C	0.5658	1.03306	0.925186	1.1523	LOX	nonsynonymous SNV	LOX:NM_002317:exon1:c.G473A:p.R158Q	0.1744	0	12.19	2.41	.
3:195517258:G:A	rs1106502	3	195517258	G	A	A	0.5671	1.032	0.925186	1.1523	MUC4	nonsynonymous SNV	MUC4:NM_018406:exon2:c.C1193T:p.T398I	0.7945	0.068	1.034	0.754	.
3:195517321:G:A	rs1104760	3	195517321	G	A	A	0.5671	1.032	0.925186	1.1523	MUC4	nonsynonymous SNV	MUC4:NM_018406:exon2:c.C1130T:p.T377I	0.7955	0.114	0.07	-0.914	.
14:73717720:G:A	rs741842	14	73717720	G	A	A	0.5671	1.035	0.920719	1.16486	PAPLN	nonsynonymous SNV	PAPLN:NM_173462:exon7:c.G571A:p.A191T	0.1347	0.733	23.6	4.33	ADAM-TS Spacer 1
3:195516878:T:C	rs2177336	3	195516878	T	C	C	0.5679	1.032	0.925186	1.1523	MUC4	nonsynonymous SNV	MUC4:NM_018406:exon2:c.A1573G:p.T525A	0.795	0.053	0.005	-2.77	.
4:73178175:T:C	rs150270324	4	73178175	T	C	C	0.5679	1.105	0.787352	1.55128	ADAMTS3	nonsynonymous SNV	ADAMTS3:NM_014243:exon13:c.A1754G:p.N585S	0.0113	0.988	23.6	5.91	.
19:10071347:C:T	rs2277969	19	10071347	C	T	T	0.5681	1.031	0.928783	1.14326	COL5A3	nonsynonymous SNV	COL5A3:NM_015719:exon66:c.G5071A:p.V1691I	0.1877	0.015	16.86	1.81	Fibrillar collagen, C-terminal
1:111957693:A:G	rs2485319	1	111957693	A	G	A	0.5686	1.02459	0.941501	1.11436	OVGP1	nonsynonymous SNV	OVGP1:NM_002557:exon11:c.T1430C:p.M477T	0.4505	0	0.045	-1.06	.
18:7049171:C:T	rs140718292	18	7049171	C	T	C	0.5687	1.12486	0.745575	1.69825	LAMA1	nonsynonymous SNV	LAMA1:NM_005559:exon5:c.G674A:p.R225H	0.0117	1	35	4.97	Laminin, N-terminal
1:186275460:CAAG:C	rs139300692	1	186275460	CAAG	C	C	0.57	1.102	0.791172	1.53455	PRG4	nonframeshift deletion	PRG4:NM_001127710:exon4:c.208_210del:p.70_70del,PRG4:NM_001127709:exon5:c.331_333del:p.111_111del,PRG4:NM_001127708:exon6:c.487_489del:p.163_163del,PRG4:NM_001303232:exon6:c.481_483del:p.161_161del,PRG4:NM_005807:exon7:c.610_612del:p.204_204del	0.026	.	.	.	.
12:9845703:C:G	rs116932414	12	9845703	C	G	G	0.5703	1.08	0.828946	1.4072	CLEC2D	nonsynonymous SNV	CLEC2D:NM_001004419:exon5:c.C535G:p.P179A	0.0274	0.571	0.155	-1.81	C-type lectin;C-type lectin|C-type lectin fold|C-type lectin-like
8:24250832:C:G	rs61752046	8	24250832	C	G	G	0.5706	1.101	0.793486	1.52702	ADAMDEC1	nonsynonymous SNV	ADAMDEC1:NM_001145272:exon2:c.C28G:p.L10V,ADAMDEC1:NM_014479:exon3:c.C265G:p.L89V,ADAMDEC1:NM_001145271:exon4:c.C28G:p.L10V	0.0217	1	23.1	2.21	Peptidase M12B, propeptide
21:46875982:G:A	rs148957774	21	46875982	G	A	A	0.5706	1.116	0.766194	1.62632	COL18A1	nonsynonymous SNV	COL18A1:NM_030582:exon1:c.G538A:p.A180T,COL18A1:NM_130444:exon1:c.G538A:p.A180T	0.0123	0.001	0.002	-8.9	Domain of unknown function DUF959, collagen XVIII, N-terminal
9:18776784:G:A	rs2060362	9	18776784	G	A	G	0.5716	1.05263	0.879572	1.26152	ADAMTSL1	nonsynonymous SNV	ADAMTSL1:NM_001040272:exon19:c.G2557A:p.G853R	0.0525	0.382	13.55	4.13	.
3:46620760:T:G	rs2293025	3	46620760	T	G	T	0.5736	1.07527	0.832135	1.39063	TDGF1	nonsynonymous SNV	TDGF1:NM_001174136:exon3:c.T79G:p.Y27D,TDGF1:NM_003212:exon3:c.T127G:p.Y43D	0.0273	0	0.114	3.31	.
3:195509939:G:T	rs202039836	3	195509939	G	T	T	0.5742	1.065	0.855114	1.32647	MUC4	nonsynonymous SNV	MUC4:NM_018406:exon2:c.C8512A:p.P2838T	0.0136	0.618	0.002	.	.
3:195509941:A:C	rs199849290	3	195509941	A	C	C	0.5742	1.065	0.855114	1.32647	MUC4	nonsynonymous SNV	MUC4:NM_018406:exon2:c.T8510G:p.I2837S	0.0214	0.292	2.5	.	.
14:36946282:C:T	rs117932795	14	36946282	C	T	T	0.5743	1.067	0.851803	1.33696	SFTA3	nonsynonymous SNV	SFTA3:NM_001101341:exon3:c.G155A:p.R52Q	0.0333	0.011	11.26	-0.259	.
1:153520954:C:T	rs36022742	1	153520954	C	T	C	0.576	1.05485	0.873576	1.27272	S100A3	nonsynonymous SNV	S100A3:NM_002960:exon2:c.G8A:p.R3K	0.0479	0.067	5.136	0.817	EF-hand domain pair
11:2169014:A:G	rs10770125	11	2169014	A	G	A	0.5767	1.03306	0.922489	1.15798	INS-IGF2	nonsynonymous SNV	INS-IGF2:NM_001042376:exon4:c.T431C:p.L144P	0.496	0.356	22.8	1.14	.
21:28210854:C:T	rs56251528	21	28210854	C	T	C	0.5773	1.05152	0.879537	1.25654	ADAMTS1	nonsynonymous SNV	ADAMTS1:NM_006988:exon8:c.G2108A:p.R703H	0.0628	0.003	23	1.83	.
4:3446079:G:T	rs41264743	4	3446079	G	T	G	0.5783	1.21655	0.604279	2.4491	HGFAC	nonsynonymous SNV	HGFAC:NM_001297439:exon6:c.G640T:p.G214C,HGFAC:NM_001528:exon6:c.G640T:p.G214C	0.0136	1	24.2	2.89	Fibronectin, type I
1:12010469:G:T	rs2273285	1	12010469	G	T	T	0.5801	1.043	0.900325	1.20804	PLOD1	nonsynonymous SNV	PLOD1:NM_000302:exon4:c.G358T:p.A120S,PLOD1:NM_001316320:exon5:c.G499T:p.A167S	0.0785	0.965	14.3	2.05	.
4:106861730:A:G	rs4340795	4	106861730	A	G	A	0.5807	1.04167	0.902957	1.20211	NPNT	nonsynonymous SNV	NPNT:NM_001033047:exon7:c.A700G:p.I234V,NPNT:NM_001184692:exon7:c.A700G:p.I234V,NPNT:NM_001184690:exon8:c.A751G:p.I251V,NPNT:NM_001184691:exon8:c.A790G:p.I264V,NPNT:NM_001184693:exon8:c.A790G:p.I264V	0.9145	0	0.003	-9.72	EGF-like calcium-binding domain|EGF-like calcium-binding, conserved site|EGF-like domain|Growth factor receptor cysteine-rich domain;EGF-like calcium-binding domain|EGF-like domain|EGF-like, conserved site|Growth factor receptor cysteine-rich domain
1:185958737:A:G	rs7539719	1	185958737	A	G	A	0.581	1.08342	0.815299	1.43936	HMCN1	nonsynonymous SNV	HMCN1:NM_031935:exon21:c.A3166G:p.T1056A	0.0156	0	0.009	4.53	Immunoglobulin I-set|Immunoglobulin subtype 2|Immunoglobulin-like domain|Immunoglobulin-like fold
1:236700807:T:A	rs1126407	1	236700807	T	A	A	0.581	1.025	0.938756	1.11986	LGALS8	nonsynonymous SNV	LGALS8:NM_201544:exon3:c.T56A:p.F19Y,LGALS8:NM_006499:exon4:c.T56A:p.F19Y,LGALS8:NM_201543:exon4:c.T56A:p.F19Y,LGALS8:NM_201545:exon4:c.T56A:p.F19Y	0.6957	0	12.97	5.45	Concanavalin A-like lectin/glucanase domain|Galectin, carbohydrate recognition domain
10:93668408:C:T	rs10881994	10	93668408	C	T	C	0.5812	1.04712	0.888127	1.23447	FGFBP3	nonsynonymous SNV	FGFBP3:NM_152429:exon2:c.G319A:p.A107T	0.0635	0.704	9.623	-6.19	.
1:111957097:C:G	rs7825	1	111957097	C	G	C	0.5818	1.02354	0.942405	1.11107	OVGP1	nonsynonymous SNV	OVGP1:NM_002557:exon11:c.G2026C:p.E676Q	0.451	0	0.001	0.154	.
14:94931105:A:G	rs11628722	14	94931105	A	G	A	0.5829	1.03093	0.924262	1.15115	SERPINA9	nonsynonymous SNV	SERPINA9:NM_001284275:exon4:c.T935C:p.V312A,SERPINA9:NM_175739:exon4:c.T1043C:p.V348A,SERPINA9:NM_001042518:exon5:c.T743C:p.V248A,SERPINA9:NM_001284276:exon5:c.T596C:p.V199A	0.8181	0	0.001	2.06	Serpin domain
1:209807815:T:C	rs2235542	1	209807815	T	C	C	0.5843	1.076	0.829709	1.39749	LAMB3	nonsynonymous SNV	LAMB3:NM_001017402:exon5:c.A541G:p.N181D,LAMB3:NM_000228:exon6:c.A541G:p.N181D,LAMB3:NM_001127641:exon6:c.A541G:p.N181D	0.0241	0.036	5.937	3.42	Laminin, N-terminal
14:94750486:T:C	rs2232710	14	94750486	T	C	T	0.5844	1.11607	0.748383	1.66502	SERPINA10	nonsynonymous SNV	SERPINA10:NM_001100607:exon5:c.A1151G:p.Q384R,SERPINA10:NM_016186:exon5:c.A1151G:p.Q384R	0.0119	0.227	15.64	5.2	Serpin domain
3:195517553:A:C	rs882605	3	195517553	A	C	C	0.5849	1.031	0.924262	1.15115	MUC4	nonsynonymous SNV	MUC4:NM_018406:exon2:c.T898G:p.F300V	0.7946	0.003	0.003	-7.14	.
7:12400837:G:A	rs2053380	7	12400837	G	A	A	0.5864	1.026	0.935083	1.12425	VWDE	nonsynonymous SNV	VWDE:NM_001346972:exon13:c.C2750T:p.T917M,VWDE:NM_001346973:exon13:c.C2285T:p.T762M,VWDE:NM_001135924:exon15:c.C3095T:p.T1032M	0.6995	0	15.45	3.11	.
8:134237635:G:T	rs35513885	8	134237635	G	T	G	0.587	1.0582	0.862569	1.29672	WISP1	nonsynonymous SNV	WISP1:NM_080838:exon3:c.G352T:p.A118S,WISP1:NM_003882:exon4:c.G613T:p.A205S	0.0403	0	0.003	1.29	Growth factor receptor cysteine-rich domain|Insulin-like growth factor-binding protein, IGFBP
6:159652931:G:C	rs420137	6	159652931	G	C	G	0.5874	1.03734	0.90821	1.18564	FNDC1	nonsynonymous SNV	FNDC1:NM_032532:exon11:c.G1387C:p.E463Q	0.8982	0	0.005	2.79	.
19:5827765:G:A	rs79744308	19	5827765	G	A	A	0.5875	1.103	0.775071	1.56957	NRTN	nonsynonymous SNV	NRTN:NM_004558:exon2:c.G175A:p.A59T	0.0365	0.442	23.2	4.09	.
10:83637775:C:G	rs1884282	10	83637775	C	G	G	0.588	1.042	0.897664	1.2092	NRG3	nonsynonymous SNV	NRG3:NM_001165973:exon1:c.C59G:p.T20R	0.1103	0	2.946	0.439	.
6:31734313:C:A	rs28400002	6	31734313	C	A	A	0.5903	1.097	0.784931	1.53443	VWA7	nonsynonymous SNV	VWA7:NM_025258:exon14:c.G2111T:p.G704V	0.0151	1	27.2	5.64	.
2:113832312:T:C	rs6761276	2	113832312	T	C	T	0.5915	1.02249	0.942405	1.11107	IL1F10	nonsynonymous SNV	IL1F10:NM_032556:exon3:c.T131C:p.I44T,IL1F10:NM_173161:exon4:c.T131C:p.I44T	0.55	0.728	23.1	3.93	.
2:238247734:C:G	rs36104025	2	238247734	C	G	C	0.5917	1.03842	0.903788	1.19382	COL6A3	nonsynonymous SNV	COL6A3:NM_057166:exon36:c.G6670C:p.D2224H,COL6A3:NM_057167:exon38:c.G7873C:p.D2625H,COL6A3:NM_004369:exon39:c.G8491C:p.D2831H	0.0799	0.999	22.9	5.09	von Willebrand factor, type A
20:2290333:C:A	rs214803	20	2290333	C	A	C	0.5923	1.04058	0.900289	1.20327	TGM3	nonsynonymous SNV	TGM3:NM_003245:exon2:c.C38A:p.T13K	0.8288	0.727	6.309	-1.08	Immunoglobulin E-set|Immunoglobulin-like fold|Transglutaminase, N-terminal
18:29793346:C:T	rs141050716	18	29793346	C	T	C	0.5938	1.0989	0.773492	1.56024	MEP1B	nonsynonymous SNV	MEP1B:NM_001308171:exon11:c.C1403T:p.A468V,MEP1B:NM_005925:exon11:c.C1403T:p.A468V	0.0125	0.039	0.04	-11.4	MATH/TRAF domain|TRAF-like
4:79300993:G:A	rs12512164	4	79300993	G	A	A	0.5943	1.025	0.935083	1.12425	FRAS1	nonsynonymous SNV	FRAS1:NM_001166133:exon27:c.G3406A:p.E1136K,FRAS1:NM_025074:exon27:c.G3406A:p.E1136K	0.291	0.867	11.41	3.55	.
6:74521947:C:T	rs2917862	6	74521947	C	T	C	0.5949	1.02249	0.941463	1.10996	CD109	nonsynonymous SNV	CD109:NM_001159588:exon28:c.C3491T:p.T1164M,CD109:NM_001159587:exon29:c.C3671T:p.T1224M,CD109:NM_133493:exon29:c.C3722T:p.T1241M	0.4769	0.177	11.99	-1.95	Alpha-macroglobulin complement component|Terpenoid cyclases/protein prenyltransferase alpha-alpha toroid
4:90816294:A:G	rs1442138	4	90816294	A	G	G	0.5952	1.046	0.885502	1.23565	MMRN1	nonsynonymous SNV	MMRN1:NM_007351:exon1:c.A172G:p.T58A	0.0499	0.002	0.001	-8.03	.
15:43531411:G:C	rs28756768	15	43531411	G	C	G	0.5956	1.03734	0.904656	1.19029	TGM5	nonsynonymous SNV	TGM5:NM_004245:exon7:c.C809G:p.A270G,TGM5:NM_201631:exon8:c.C1055G:p.A352G	0.0892	0	5.94	3.69	Transglutaminase-like
1:27699670:AG:A	rs28357092	1	27699670	AG	A	AG	0.5962	1.20048	0.60353	2.3892	FCN3	frameshift deletion	FCN3:NM_173452:exon4:c.316delC:p.L106fs,FCN3:NM_003665:exon5:c.349delC:p.L117fs	0.015	.	.	.	.
21:28338298:C:G	rs457947	21	28338298	C	G	C	0.5967	1.03093	0.92153	1.15225	ADAMTS5	nonsynonymous SNV	ADAMTS5:NM_007038:exon1:c.G413C:p.G138A	0.1484	0.898	12.59	4.57	Peptidase M12B, propeptide
9:21166308:G:T	rs35082920	9	21166308	G	T	T	0.5969	1.102	0.772781	1.57107	IFNA21	nonsynonymous SNV	IFNA21:NM_002175:exon1:c.C304A:p.Q102K	0.0174	0	0.001	-8.05	Four-helical cytokine, core|Four-helical cytokine-like, core
14:94935901:G:C	rs12879019	14	94935901	G	C	G	0.597	1.0352	0.910829	1.17515	SERPINA9	nonsynonymous SNV	SERPINA9:NM_001284275:exon2:c.C223G:p.Q75E,SERPINA9:NM_175739:exon2:c.C331G:p.Q111E	0.2315	0.907	15.77	4.12	Serpin domain
20:23546639:T:G	rs2295564	20	23546639	T	G	G	0.597	1.023	0.938718	1.11543	CST9L	nonsynonymous SNV	CST9L:NM_080610:exon2:c.A326C:p.H109P	0.3895	0	0.016	1.92	Cystatin domain
6:55988870:G:C	rs192244210	6	55988870	G	C	G	0.5974	1.15875	0.664553	2.02312	COL21A1	nonsynonymous SNV	COL21A1:NM_001318752:exon15:c.C1739G:p.P580R,COL21A1:NM_030820:exon16:c.C1748G:p.P583R,COL21A1:NM_001318751:exon17:c.C1748G:p.P583R	0.0156	0.994	22.9	4.36	.
9:14784389:G:A	rs41265306	9	14784389	G	A	A	0.5977	1.087	0.799539	1.47952	FREM1	nonsynonymous SNV	FREM1:NM_144966:exon25:c.C4421T:p.T1474I	0.0139	0.059	11.42	4.64	.
19:10076990:G:C	rs3745581	19	10076990	G	C	G	0.5977	1.11235	0.746858	1.65513	COL5A3	nonsynonymous SNV	COL5A3:NM_015719:exon64:c.C4782G:p.I1594M	0.0146	0.001	3.365	-8.19	Fibrillar collagen, C-terminal
21:28217059:C:T	rs61750213	21	28217059	C	T	C	0.5984	1.12613	0.720449	1.761	ADAMTS1	nonsynonymous SNV	ADAMTS1:NM_006988:exon1:c.G215A:p.G72E	0.0149	0.006	2.076	-5.23	Peptidase M12B, propeptide
4:25032135:C:T	rs74901868	4	25032135	C	T	T	0.5993	1.03	0.92153	1.15225	LGI2	nonsynonymous SNV	LGI2:NM_018176:exon1:c.G181A:p.G61S	0.1828	0.001	22.5	3.38	.
9:14801738:G:C	rs16932300	9	14801738	G	C	G	0.6	1.04493	0.884617	1.23442	FREM1	nonsynonymous SNV	FREM1:NM_144966:exon21:c.C3606G:p.S1202R	0.0633	0.002	0.005	-2.39	.
22:24121378:C:T	rs738792	22	24121378	C	T	C	0.6	1.04932	0.876061	1.25649	MMP11	nonsynonymous SNV	MMP11:NM_005940:exon2:c.C113T:p.A38V	0.9223	0.099	9.671	0.812	.
8:139838912:T:C	rs2292927	8	139838912	T	C	T	0.6003	1.02775	0.926927	1.14097	COL22A1	nonsynonymous SNV	COL22A1:NM_152888:exon6:c.A958G:p.S320G	0.7936	0	21.1	5.21	Concanavalin A-like lectin/glucanase domain|Laminin G domain
11:124016058:C:T	rs117689747	11	124016058	C	T	C	0.6013	1.07066	0.827191	1.3878	VWA5A	nonsynonymous SNV	VWA5A:NM_014622:exon17:c.C2269T:p.R757C,VWA5A:NM_001130142:exon18:c.C2269T:p.R757C	0.0239	0.997	23.1	0.844	.
5:33576602:A:G	rs3813474	5	33576602	A	G	A	0.6018	1.0352	0.908173	1.18095	ADAMTS12	nonsynonymous SNV	ADAMTS12:NM_001324512:exon17:c.T3274C:p.W1092R,ADAMTS12:NM_030955:exon19:c.T3529C:p.W1177R	0.0969	0.005	2.373	2.83	.
1:236700857:C:T	rs1041935	1	236700857	C	T	T	0.602	1.024	0.93688	1.11762	LGALS8	nonsynonymous SNV	LGALS8:NM_201544:exon3:c.C106T:p.R36C,LGALS8:NM_006499:exon4:c.C106T:p.R36C,LGALS8:NM_201543:exon4:c.C106T:p.R36C,LGALS8:NM_201545:exon4:c.C106T:p.R36C	0.6966	0.04	26.1	5.45	Concanavalin A-like lectin/glucanase domain|Galectin, carbohydrate recognition domain
15:75969335:C:T	rs77237106	15	75969335	C	T	C	0.6036	1.03413	0.910829	1.17515	CSPG4	nonsynonymous SNV	CSPG4:NM_001897:exon10:c.G5525A:p.R1842Q	0.1849	0.014	16.99	3.16	.
3:186459927:T:C	rs710446	3	186459927	T	C	C	0.605	1.022	0.93962	1.11213	KNG1	nonsynonymous SNV	KNG1:NM_001102416:exon10:c.T1742C:p.I581T	0.397	0	2.234	5.61	.
21:28338425:G:A	rs78037991	21	28338425	G	A	A	0.6054	1.08	0.808091	1.44351	ADAMTS5	nonsynonymous SNV	ADAMTS5:NM_007038:exon1:c.C286T:p.R96W	0.0167	0.997	33	3.35	Peptidase M12B, propeptide
7:100771717:G:A	rs6092	7	100771717	G	A	A	0.6056	1.04	0.896766	1.20799	SERPINE1	nonsynonymous SNV	SERPINE1:NM_000602:exon2:c.G43A:p.A15T	0.1247	0.562	13.61	3.88	.
6:32023903:G:C	rs440160	6	32023903	G	C	C	0.6057	1.055	0.861673	1.29031	TNXB	nonsynonymous SNV	TNXB:NM_019105:exon24:c.C8192G:p.P2731R	0.0325	0.989	25.2	4.48	.
4:71472164:T:C	rs72654387	4	71472164	T	C	T	0.6061	1.04822	0.875185	1.25523	AMBN	nonsynonymous SNV	AMBN:NM_016519:exon13:c.T1061C:p.L354P	0.0534	1	23.5	5.7	.
2:20205541:C:T	rs52826764	2	20205541	C	T	C	0.6068	1.07066	0.823131	1.39186	MATN3	nonsynonymous SNV	MATN3:NM_002381:exon2:c.G754A:p.E252K	0.0288	1	34	5.36	von Willebrand factor, type A
5:156936364:T:C	rs1422795	5	156936364	T	C	C	0.6071	1.023	0.93778	1.11432	ADAM19	nonsynonymous SNV	ADAM19:NM_033274:exon9:c.A850G:p.S284G	0.3369	0.897	14.33	1.33	Metallopeptidase, catalytic domain|Peptidase M12B, ADAM/reprolysin
12:88900891:C:A	rs41283112	12	88900891	C	A	A	0.6071	1.086	0.79482	1.48237	KITLG	nonsynonymous SNV	KITLG:NM_003994:exon6:c.G544T:p.D182Y,KITLG:NM_000899:exon7:c.G628T:p.D210Y	0.0165	1	24.9	2.84	.
17:34340325:C:T	rs80219613	17	34340325	C	T	C	0.6071	1.09649	0.767421	1.56631	CCL23	nonsynonymous SNV	CCL23:NM_005064:exon4:c.G326A:p.R109H,CCL23:NM_145898:exon4:c.G275A:p.R92H	0.0145	0.986	11.78	-7.43	CC chemokine, conserved site|Chemokine interleukin-8-like domain;Chemokine interleukin-8-like domain
9:113275227:C:T	rs10980419	9	113275227	C	T	C	0.6074	1.06838	0.829576	1.37553	SVEP1	nonsynonymous SNV	SVEP1:NM_153366:exon5:c.G1282A:p.G428S	0.0288	0.856	24.3	2.19	Growth factor receptor cysteine-rich domain|Sushi/SCR/CCP domain
13:51918558:G:A	rs17790811	13	51918558	G	A	A	0.6074	1.068	0.831204	1.37284	SERPINE3	nonsynonymous SNV	SERPINE3:NM_001101320:exon2:c.G427A:p.D143N	0.0331	0.045	0.127	1.43	Serpin domain
2:228147093:A:G	rs56226424	2	228147093	A	G	A	0.6075	1.08696	0.787856	1.49846	COL4A3	nonsynonymous SNV	COL4A3:NM_000091:exon32:c.A2501G:p.K834R	0.0182	0.035	0.138	1.3	.
20:39990614:C:T	rs2235592	20	39990614	C	T	T	0.6079	1.028	0.926001	1.13983	EMILIN3	nonsynonymous SNV	EMILIN3:NM_052846:exon4:c.G1595A:p.S532N	0.2151	0	0.696	0.312	.
8:42044965:G:A	rs2020921	8	42044965	G	A	A	0.6089	1.078	0.810455	1.43643	PLAT	nonsynonymous SNV	PLAT:NM_033011:exon5:c.C352T:p.R118W,PLAT:NM_000930:exon6:c.C490T:p.R164W	0.02	0.114	23.3	1.92	EGF-like domain|EGF-like, conserved site|Kringle-like fold;Kringle|Kringle-like fold
12:6143984:T:C	rs216321	12	6143984	T	C	T	0.6104	1.03842	0.89849	1.20086	VWF	nonsynonymous SNV	VWF:NM_000552:exon20:c.A2555G:p.Q852R	0.8951	0	6.344	0.423	VWFC domain
7:12410112:G:A	rs963323	7	12410112	G	A	G	0.6105	1.02881	0.922415	1.14885	VWDE	nonsynonymous SNV	VWDE:NM_001346972:exon10:c.C1475T:p.S492F,VWDE:NM_001346973:exon10:c.C1010T:p.S337F,VWDE:NM_001135924:exon12:c.C1820T:p.S607F	0.8481	0	8.758	3.38	von Willebrand factor, type D domain
4:78987157:A:G	rs4859905	4	78987157	A	G	A	0.6111	1.02145	0.93962	1.11213	FRAS1	nonsynonymous SNV	FRAS1:NM_001166133:exon2:c.A95G:p.D32G,FRAS1:NM_025074:exon2:c.A95G:p.D32G	0.4094	0	14.83	5.9	VWC out|VWFC domain;VWFC domain
3:195509374:T:G	rs62282479	3	195509374	T	G	G	0.6115	1.037	0.900216	1.19377	MUC4	nonsynonymous SNV	MUC4:NM_018406:exon2:c.A9077C:p.H3026P	0.0291	0.797	0.204	.	.
19:9073888:C:T	rs76873427	19	9073888	C	T	T	0.6128	1.057	0.854157	1.30949	MUC16	nonsynonymous SNV	MUC16:NM_024690:exon3:c.G13558A:p.A4520T	0.0375	0.087	5.201	-2.24	.
2:74763247:C:T	rs77706750	2	74763247	C	T	C	0.6132	1.07296	0.815136	1.41114	LOXL3	nonsynonymous SNV	LOXL3:NM_001289165:exon3:c.G41A:p.R14H,LOXL3:NM_001289164:exon5:c.G689A:p.R230H,LOXL3:NM_032603:exon7:c.G1124A:p.R375H	0.0182	0.984	25	4.22	SRCR domain|SRCR-like domain
10:93668110:T:A	rs1107947	10	93668110	T	A	T	0.6143	1.02459	0.932319	1.12533	FGFBP3	nonsynonymous SNV	FGFBP3:NM_152429:exon2:c.A617T:p.E206V	0.2648	0.003	6.108	-3.7	.
1:153390626:G:A	rs55985140	1	153390626	G	A	G	0.6145	1.09529	0.766654	1.56474	S100A7A	nonsynonymous SNV	S100A7A:NM_176823:exon2:c.G68A:p.R23H	0.05	0.002	0.004	-4.92	EF-hand domain pair|S100/CaBP-9k-type, calcium binding, subdomain
11:88045583:A:G	rs217086	11	88045583	A	G	G	0.6147	1.03	0.918806	1.15336	CTSC	nonsynonymous SNV	CTSC:NM_001814:exon3:c.T458C:p.I153T	0.836	0	0.003	-9.46	.
22:45996298:A:G	rs13268	22	45996298	A	G	G	0.6153	1.071	0.822341	1.39598	FBLN1	nonsynonymous SNV	FBLN1:NM_006486:exon17:c.A2084G:p.H695R	0.0281	0.994	23.6	5.49	.
15:43571463:G:A	rs148818002	15	43571463	G	A	G	0.6156	1.10132	0.753339	1.61162	TGM7	nonsynonymous SNV	TGM7:NM_052955:exon11:c.C1691T:p.P564L	0.0556	0.497	22.8	3.53	Immunoglobulin-like fold|Transglutaminase, C-terminal
18:61647069:G:A	rs1944270	18	61647069	G	A	G	0.6185	1.02775	0.922378	1.14431	SERPINB8	nonsynonymous SNV	SERPINB8:NM_001031848:exon3:c.G203A:p.R68Q,SERPINB8:NM_001348367:exon3:c.G203A:p.R68Q,SERPINB8:NM_001348368:exon3:c.G203A:p.R68Q,SERPINB8:NM_001348369:exon3:c.G203A:p.R68Q,SERPINB8:NM_002640:exon3:c.G203A:p.R68Q,SERPINB8:NM_198833:exon3:c.G203A:p.R68Q	0.2926	0	4.984	-5.63	Serpin domain
19:10112346:T:C	rs2287803	19	10112346	T	C	T	0.6186	1.06838	0.826331	1.38093	COL5A3	nonsynonymous SNV	COL5A3:NM_015719:exon8:c.A964G:p.R322G	0.973	0	0.568	2.17	.
1:109260477:G:C	rs141252453	1	109260477	G	C	G	0.6192	1.09649	0.758449	1.58483	FNDC7	nonsynonymous SNV	FNDC7:NM_001144937:exon3:c.G161C:p.G54A	0.0167	1	27.8	5.78	Fibronectin type III|Immunoglobulin-like fold
3:195511204:T:G	rs423290	3	195511204	T	G	T	0.62	1.08814	0.779424	1.51771	MUC4	nonsynonymous SNV	MUC4:NM_018406:exon2:c.A7247C:p.H2416P	0.1653	0.012	0.161	.	.
4:15964485:G:A	rs758329	4	15964485	G	A	G	0.622	1.02145	0.938681	1.11102	FGFBP2	nonsynonymous SNV	FGFBP2:NM_031950:exon1:c.C268T:p.P90S	0.4616	0.126	0.093	1.08	.
1:150526270:C:T	rs41317517	1	150526270	C	T	T	0.6223	1.107	0.743133	1.64688	ADAMTSL4	nonsynonymous SNV	ADAMTSL4:NM_001288607:exon6:c.C803T:p.S268F,ADAMTSL4:NM_001288608:exon6:c.C803T:p.S268F,ADAMTSL4:NM_019032:exon6:c.C803T:p.S268F,ADAMTSL4:NM_025008:exon6:c.C803T:p.S268F	0.0107	0.001	1.978	0.378	.
6:32029183:C:T	rs2269429	6	32029183	C	T	T	0.6224	1.036	0.901081	1.19025	TNXB	nonsynonymous SNV	TNXB:NM_019105:exon21:c.G7483A:p.G2495S	0.0914	1	22.9	4.43	Fibronectin type III|Immunoglobulin-like fold
2:36737128:G:A	rs12997487	2	36737128	G	A	G	0.6238	1.0917	0.765857	1.557	CRIM1	nonsynonymous SNV	CRIM1:NM_016441:exon9:c.G1504A:p.E502K	0.0145	0.865	28.3	3.82	Antistasin-like domain
6:32025870:C:T	rs2066982	6	32025870	C	T	T	0.6239	1.035	0.902849	1.18792	TNXB	nonsynonymous SNV	TNXB:NM_019105:exon22:c.G7790A:p.R2597Q	0.0921	0	0.114	-6.81	Fibronectin type III|Immunoglobulin-like fold
19:8145928:C:T	rs3848570	19	8145928	C	T	T	0.624	1.049	0.867517	1.26886	FBN3	nonsynonymous SNV	FBN3:NM_001321431:exon59:c.G7412A:p.R2471H,FBN3:NM_032447:exon59:c.G7412A:p.R2471H	0.0421	0.032	22.6	0.915	EGF-like calcium-binding domain|EGF-like domain|EGF-like, conserved site|Growth factor receptor cysteine-rich domain
1:22179244:C:T	rs35669711	1	22179244	C	T	C	0.6246	1.04384	0.878552	1.24046	HSPG2	nonsynonymous SNV	HSPG2:NM_001291860:exon52:c.G6676A:p.G2226S,HSPG2:NM_005529:exon52:c.G6673A:p.G2225S	0.0564	0.299	12.31	1.57	Immunoglobulin I-set|Immunoglobulin subtype 2|Immunoglobulin-like domain|Immunoglobulin-like fold
21:28305212:C:T	rs2830585	21	28305212	C	T	T	0.6257	1.028	0.919689	1.14995	ADAMTS5	nonsynonymous SNV	ADAMTS5:NM_007038:exon5:c.G1841A:p.R614H	0.1386	1	35	6.03	.
2:189864080:G:A	rs1800255	2	189864080	G	A	A	0.628	1.024	0.931387	1.12421	COL3A1	nonsynonymous SNV	COL3A1:NM_000090:exon30:c.G2092A:p.A698T	0.2463	0	22.9	0.873	.
5:76171252:A:C	rs1320308	5	76171252	A	C	A	0.6289	1.02145	0.936843	1.1132	S100Z	nonsynonymous SNV	S100Z:NM_130772:exon3:c.A68C:p.E23A	0.6871	1	23.1	5.58	EF-hand domain pair|S100/CaBP-9k-type, calcium binding, subdomain
3:49158763:C:T	rs74951356	3	49158763	C	T	T	0.6295	1.058	0.844171	1.32498	LAMB2	nonsynonymous SNV	LAMB2:NM_002292:exon32:c.G5293A:p.A1765T	0.0256	0.039	18.25	5.27	.
19:8188812:C:T	rs35840170	19	8188812	C	T	T	0.6308	1.053	0.854909	1.29532	FBN3	nonsynonymous SNV	FBN3:NM_001321431:exon23:c.G2812A:p.V938I,FBN3:NM_032447:exon23:c.G2812A:p.V938I	0.0378	0.646	19.72	-0.095	TB domain
11:102495998:T:G	rs2245803	11	102495998	T	G	T	0.6317	1.02145	0.936843	1.1132	MMP20	nonsynonymous SNV	MMP20:NM_004771:exon1:c.A53C:p.K18T	0.6289	0	11.95	4.12	.
10:20534333:A:G	rs2778979	10	20534333	A	G	G	0.6318	1.035	0.899317	1.19258	PLXDC2	nonsynonymous SNV	PLXDC2:NM_001282736:exon12:c.A1225G:p.I409V,PLXDC2:NM_032812:exon13:c.A1372G:p.I458V	0.8977	0	4.915	5	.
3:130095179:T:C	rs113396273	3	130095179	T	C	C	0.6323	1.065	0.823856	1.3768	COL6A5	nonsynonymous SNV	COL6A5:NM_001278298:exon3:c.T167C:p.M56T,COL6A5:NM_153264:exon3:c.T167C:p.M56T	0.0261	0.02	0.476	5.14	von Willebrand factor, type A
1:150727539:G:A	rs2230061	1	150727539	G	A	G	0.6333	1.02041	0.938681	1.11102	CTSS	nonsynonymous SNV	CTSS:NM_004079:exon4:c.C337T:p.R113W	0.3537	0.904	23	1.23	.
1:186273994:C:T	rs2273779	1	186273994	C	T	T	0.6334	1.021	0.936843	1.1132	PRG4	nonsynonymous SNV	PRG4:NM_001127708:exon5:c.C415T:p.R139W,PRG4:NM_005807:exon6:c.C538T:p.R180W	0.343	0.949	25.4	4.26	.
1:22310811:G:A	rs112944567	1	22310811	G	A	A	0.6343	1.085	0.777089	1.51316	CELA3B	nonsynonymous SNV	CELA3B:NM_007352:exon6:c.G629A:p.R210H	0.0123	0.142	7.86	-6.12	Peptidase S1, PA clan|Serine proteases, trypsin domain
18:61387312:G:A	rs1506418	18	61387312	G	A	G	0.6345	1.02249	0.932282	1.12089	SERPINB11	nonsynonymous SNV	SERPINB11:NM_001291279:exon5:c.G16A:p.A6T	0.2725	0.998	26	5.5	Serpin domain
6:129571272:G:A	rs36044314	6	129571272	G	A	G	0.6354	1.09409	0.752496	1.591	LAMA2	nonsynonymous SNV	LAMA2:NM_000426:exon13:c.G1798A:p.G600R,LAMA2:NM_001079823:exon13:c.G1798A:p.G600R	0.0169	0.999	32	5.69	Laminin IV
1:208212224:C:T	rs34457681	1	208212224	C	T	C	0.6356	1.08696	0.768035	1.53713	PLXNA2	nonsynonymous SNV	PLXNA2:NM_025179:exon25:c.G4606A:p.V1536M	0.0275	0.999	24.7	2.58	Plexin, cytoplasmic RasGAP domain
17:66533655:A:G	rs2907373	17	66533655	A	G	A	0.6367	1.02145	0.936843	1.1132	FAM20A	nonsynonymous SNV	FAM20A:NM_017565:exon11:c.T1589C:p.L530S,FAM20A:NM_001243746:exon12:c.T1175C:p.L392S	0.6517	0	0.054	1.13	.
7:100637041:C:A	rs200567764	7	100637041	C	A	C	0.6376	1.04167	0.880241	1.23314	MUC12	nonsynonymous SNV	MUC12:NM_001164462:exon2:c.C3197A:p.T1066K	0.1162	.	0.637	-1.43	.
18:61387333:T:A	rs1506419	18	61387333	T	A	T	0.6383	1.02249	0.932282	1.12089	SERPINB11	nonsynonymous SNV	SERPINB11:NM_001291279:exon5:c.T37A:p.W13R	0.2728	1	32	5.62	Serpin domain
6:30993567:G:T	rs4713420	6	30993567	G	T	G	0.6396	1.02775	0.916091	1.15447	MUC22	nonsynonymous SNV	MUC22:NM_001198815:exon3:c.G359T:p.G120V,MUC22:NM_001318484:exon3:c.G368T:p.G123V,MUC22:NM_001322469:exon3:c.G368T:p.G123V	0.177	.	0.072	-3.28	.
12:7842932:C:T	rs12819884	12	7842932	C	T	T	0.6396	1.023	0.931387	1.12421	GDF3	nonsynonymous SNV	GDF3:NM_020634:exon2:c.G637A:p.G213R	0.3012	0.001	8.732	1.64	Transforming growth factor-beta, N-terminal
20:43803606:G:A	rs41282752	20	43803606	G	A	G	0.6396	1.05152	0.852382	1.29657	PI3	nonsynonymous SNV	PI3:NM_002638:exon1:c.G43A:p.A15T	0.0477	0.471	8.523	1.85	.
6:70961833:T:C	rs1135056	6	70961833	T	C	T	0.6398	1.02041	0.939582	1.10774	COL9A1	nonsynonymous SNV	COL9A1:NM_078485:exon22:c.A1133G:p.Q378R,COL9A1:NM_001851:exon28:c.A1862G:p.Q621R	0.4097	0.001	1.269	4.93	.
16:77325325:G:T	rs35478105	16	77325325	G	T	T	0.6407	1.02	0.939582	1.10774	ADAMTS18	nonsynonymous SNV	ADAMTS18:NM_001326358:exon21:c.C2724A:p.S908R,ADAMTS18:NM_199355:exon21:c.C3240A:p.S1080R	0.4764	0.188	23.2	-4.75	.
11:102650424:C:T	rs486055	11	102650424	C	T	T	0.644	1.029	0.912507	1.159	MMP10	nonsynonymous SNV	MMP10:NM_002425:exon2:c.G158A:p.R53K	0.1676	0.033	11.07	4.25	Metallopeptidase, catalytic domain|Peptidoglycan binding-like;Peptidoglycan binding-like
18:61471529:C:T	rs61735186	18	61471529	C	T	C	0.644	1.03199	0.90191	1.18204	SERPINB7	nonsynonymous SNV	SERPINB7:NM_001261831:exon7:c.C752T:p.T251I,SERPINB7:NM_001040147:exon8:c.C803T:p.T268I,SERPINB7:NM_001261830:exon8:c.C803T:p.T268I,SERPINB7:NM_003784:exon8:c.C803T:p.T268I	0.1055	0.34	12.74	-5.99	Serpin domain
1:153410798:A:G	rs116156022	1	153410798	A	G	A	0.6444	1.09051	0.751714	1.58312	S100A7L2	nonsynonymous SNV	S100A7L2:NM_001045479:exon2:c.T41C:p.I14T	0.0112	0.103	0.001	-3.61	EF-hand domain pair
3:129304797:G:A	rs2285372	3	129304797	G	A	G	0.6447	1.05708	0.833468	1.33932	PLXND1	nonsynonymous SNV	PLXND1:NM_015103:exon5:c.C1849T:p.P617S	0.0297	0	0.264	1.58	.
1:186276661:A:G	rs61831150	1	186276661	A	G	G	0.6452	1.021	0.935906	1.11209	PRG4	nonsynonymous SNV	PRG4:NM_001127710:exon4:c.A1408G:p.T470A,PRG4:NM_001127709:exon5:c.A1531G:p.T511A,PRG4:NM_001127708:exon6:c.A1687G:p.T563A,PRG4:NM_001303232:exon6:c.A1681G:p.T561A,PRG4:NM_005807:exon7:c.A1810G:p.T604A	0.3278	0.021	0.002	-6.98	.
18:6975995:G:C	rs117225191	18	6975995	G	C	C	0.6453	1.067	0.812662	1.40136	LAMA1	nonsynonymous SNV	LAMA1:NM_005559:exon45:c.C6430G:p.L2144V	0.0187	1	22.2	4.54	Concanavalin A-like lectin/glucanase domain|Laminin G domain|Laminin domain II
4:81207686:G:GAGC	rs34623167	4	81207686	G	GAGC	GAGC	0.6454	1.127	0.680641	1.86399	FGF5	nonframeshift insertion	FGF5:NM_001291812:exon3:c.238_239insAGC:p.E80delinsEQ,FGF5:NM_004464:exon3:c.667_668insAGC:p.E223delinsEQ	0.0165	.	.	.	.
8:134239770:T:C	rs3739261	8	134239770	T	C	T	0.6465	1.02041	0.935906	1.11209	WISP1	stoploss	WISP1:NM_001204869:exon3:c.T466C:p.X156Q	0.3441	.	0.195	3.77	VWFC domain
13:111156250:G:A	rs45520539	13	111156250	G	A	A	0.6466	1.059	0.829444	1.35391	COL4A2	nonsynonymous SNV	COL4A2:NM_001846:exon44:c.G4195A:p.V1399I	0.0418	0.784	1.514	-5.56	.
1:152193286:G:T	rs7545406	1	152193286	G	T	G	0.6484	1.02145	0.93135	1.11977	HRNR	nonsynonymous SNV	HRNR:NM_001009931:exon3:c.C819A:p.H273Q	0.6214	0.001	0.001	-8.81	.
2:227915832:G:A	rs1800517	2	227915832	G	A	G	0.6519	1.01937	0.938643	1.10663	COL4A4	nonsynonymous SNV	COL4A4:NM_000092:exon33:c.C3011T:p.P1004L	0.4818	0.634	20.9	4.64	.
19:9070264:A:C	rs61732905	19	9070264	A	C	A	0.6548	1.08578	0.75533	1.55987	MUC16	nonsynonymous SNV	MUC16:NM_024690:exon3:c.T17182G:p.S5728A	0.0139	0.815	0.012	-0.584	.
9:78910273:G:A	rs2643325	9	78910273	G	A	A	0.6549	1.022	0.928635	1.12529	PCSK5	nonsynonymous SNV	PCSK5:NM_001190482:exon26:c.G3268A:p.G1090S	0.2068	.	14.02	2.62	Growth factor receptor cysteine-rich domain
9:78910241:A:C	rs2842480	9	78910241	A	C	C	0.656	1.022	0.928635	1.12529	PCSK5	nonsynonymous SNV	PCSK5:NM_001190482:exon26:c.A3236C:p.E1079A	0.2068	.	3.732	1.79	Growth factor receptor cysteine-rich domain
3:130285929:C:T	rs59021909	3	130285929	C	T	T	0.6564	1.07	0.796921	1.43476	COL6A6	nonsynonymous SNV	COL6A6:NM_001102608:exon4:c.C1666T:p.P556S	0.0194	0.999	25.8	5.24	von Willebrand factor, type A
1:111957688:T:C	rs3767607	1	111957688	T	C	C	0.6567	1.038	0.88017	1.22341	OVGP1	nonsynonymous SNV	OVGP1:NM_002557:exon11:c.A1435G:p.M479V	0.0669	0.077	2.683	0.203	.
9:133924451:C:T	rs869457	9	133924451	C	T	T	0.6579	1.026	0.916054	1.14991	LAMC3	nonsynonymous SNV	LAMC3:NM_006059:exon9:c.C1564T:p.P522S	0.3161	0.243	5.635	3.88	Laminin IV
7:12417407:C:T	rs7793993	7	12417407	C	T	T	0.658	1.02	0.932245	1.11646	VWDE	nonsynonymous SNV	VWDE:NM_001135924:exon7:c.G1019A:p.G340D,VWDE:NM_001346972:exon7:c.G1019A:p.G340D,VWDE:NM_001346973:exon7:c.G554A:p.G185D	0.7008	0	12.59	4.68	.
10:81373777:C:T	rs4253527	10	81373777	C	T	T	0.6581	1.052	0.841609	1.31579	SFTPA1	nonsynonymous SNV	SFTPA1:NM_001164647:exon5:c.C655T:p.R219W,SFTPA1:NM_001093770:exon6:c.C700T:p.R234W,SFTPA1:NM_001164644:exon6:c.C655T:p.R219W,SFTPA1:NM_001164645:exon6:c.C553T:p.R185W,SFTPA1:NM_001164646:exon6:c.C508T:p.R170W,SFTPA1:NM_005411:exon6:c.C655T:p.R219W	0.0918	0.026	13.59	1.94	C-type lectin|C-type lectin fold|C-type lectin, conserved site|C-type lectin-like;C-type lectin|C-type lectin fold|C-type lectin-like
11:17655748:G:A	rs61743165	11	17655748	G	A	G	0.6585	1.06952	0.790697	1.44606	OTOG	nonsynonymous SNV	OTOG:NM_001277269:exon43:c.G7436A:p.R2479H,OTOG:NM_001292063:exon44:c.G7400A:p.R2467H	0.0394	.	14.23	2.76	.
9:133962930:C:T	rs7024108	9	133962930	C	T	T	0.659	1.02	0.934971	1.11098	LAMC3	nonsynonymous SNV	LAMC3:NM_006059:exon26:c.C4298T:p.T1433M	0.3306	0.615	24.2	2.92	.
1:152192825:C:T	rs6666097	1	152192825	C	T	C	0.6602	1.02041	0.932245	1.11646	HRNR	nonsynonymous SNV	HRNR:NM_001009931:exon3:c.G1280A:p.G427D	0.6219	0.895	4.223	0.311	.
6:160961137:T:C	rs3798220	6	160961137	T	C	T	0.661	1.07527	0.773925	1.49523	LPA	nonsynonymous SNV	LPA:NM_005577:exon37:c.A5673G:p.I1891M	0.0204	0.998	16.65	2.99	Kringle|Kringle-like fold
3:195513365:G:A	rs62282501	3	195513365	G	A	A	0.6627	1.026	0.915138	1.14876	MUC4	nonsynonymous SNV	MUC4:NM_018406:exon2:c.C5086T:p.R1696C	0.1652	0.005	7.425	.	.
6:70944257:T:C	rs6910140	6	70944257	T	C	T	0.6627	1.08696	0.743609	1.5908	COL9A1	nonsynonymous SNV	COL9A1:NM_078485:exon29:c.A1570G:p.M524V,COL9A1:NM_001851:exon35:c.A2299G:p.M767V	0.0158	0.251	8.701	3.3	.
1:175105996:C:T	rs2072036	1	175105996	C	T	C	0.6629	1.03306	0.891366	1.19602	TNN	nonsynonymous SNV	TNN:NM_022093:exon17:c.C3467T:p.A1156V	0.11	0	10.2	1.92	Fibrinogen, alpha/beta/gamma chain, C-terminal globular domain|Fibrinogen, alpha/beta/gamma chain, C-terminal globular, subdomain 1
1:109265029:G:T	rs4423040	1	109265029	G	T	T	0.6631	1.019	0.937705	1.10552	FNDC7	nonsynonymous SNV	FNDC7:NM_001144937:exon5:c.G671T:p.R224L	0.6143	0	1.492	0.32	Fibronectin type III|Immunoglobulin-like fold
21:28338581:G:T	rs3746840	21	28338581	G	T	T	0.6631	1.068	0.794565	1.43614	ADAMTS5	nonsynonymous SNV	ADAMTS5:NM_007038:exon1:c.C130A:p.R44S	0.0366	0	23.3	0.977	.
1:22168845:A:T	rs2229489	1	22168845	A	T	A	0.6633	1.03842	0.875885	1.23185	HSPG2	nonsynonymous SNV	HSPG2:NM_001291860:exon68:c.T8942A:p.L2981H,HSPG2:NM_005529:exon68:c.T8939A:p.L2980H	0.0567	0	7.972	4.95	Immunoglobulin subtype 2|Immunoglobulin-like domain|Immunoglobulin-like fold
3:186395436:C:T	rs1042445	3	186395436	C	T	T	0.6635	1.022	0.927706	1.12416	HRG	nonsynonymous SNV	HRG:NM_000412:exon7:c.C1342T:p.R448C	0.2316	0.001	14.2	2.35	.
11:1266599:C:T	rs139960671	11	1266599	C	T	T	0.6637	1.034	0.890511	1.19957	MUC5B	nonsynonymous SNV	MUC5B:NM_002458:exon31:c.C8489T:p.P2830L	0.1915	0.273	6.729	-0.897	.
7:149503843:T:G	rs10260959	7	149503843	T	G	T	0.6641	1.02459	0.919615	1.14088	SSPO	nonsynonymous SNV	SSPO:NM_198455:exon59:c.T8671G:p.L2891V	0.1684	0	16.59	3.25	Trypsin Inhibitor-like, cysteine rich domain
2:96795608:T:G	rs1657502	2	96795608	T	G	G	0.6642	1.019	0.936805	1.1088	ASTL	nonsynonymous SNV	ASTL:NM_001002036:exon8:c.A829C:p.K277Q	0.3821	0.026	11.51	-2.33	Metallopeptidase, catalytic domain|Peptidase M12A, astacin
1:150532376:G:A	rs56411234	1	150532376	G	A	A	0.6651	1.068	0.79301	1.43896	ADAMTSL4	nonsynonymous SNV	ADAMTSL4:NM_019032:exon18:c.G3083A:p.R1028H,ADAMTSL4:NM_001288607:exon19:c.G2966A:p.R989H,ADAMTSL4:NM_001288608:exon19:c.G3152A:p.R1051H	0.0249	0.018	22.9	3.24	PLAC
19:8160897:G:C	rs12150963	19	8160897	G	C	C	0.6653	1.027	0.90981	1.16012	FBN3	nonsynonymous SNV	FBN3:NM_001321431:exon45:c.C5607G:p.N1869K,FBN3:NM_032447:exon45:c.C5607G:p.N1869K	0.1375	0.334	23.5	3.71	EGF-like calcium-binding domain|EGF-like calcium-binding, conserved site|EGF-like domain|Growth factor receptor cysteine-rich domain
7:83634712:C:T	rs147436181	7	83634712	C	T	T	0.6654	1.066	0.800787	1.41929	SEMA3A	nonsynonymous SNV	SEMA3A:NM_006080:exon11:c.G1303A:p.V435I	0.0234	0.113	23.4	4.96	Sema domain|WD40/YVTN repeat-like-containing domain
10:127967532:C:T	rs75316572	10	127967532	C	T	T	0.6661	1.081	0.761946	1.53094	ADAM12	nonsynonymous SNV	ADAM12:NM_001288973:exon3:c.G212A:p.R71Q,ADAM12:NM_001288974:exon3:c.G212A:p.R71Q,ADAM12:NM_001288975:exon3:c.G212A:p.R71Q,ADAM12:NM_003474:exon3:c.G212A:p.R71Q,ADAM12:NM_021641:exon3:c.G212A:p.R71Q	0.0129	0.028	12.4	0.824	Peptidase M12B, propeptide
19:8201121:C:T	rs35277492	19	8201121	C	T	T	0.6663	1.078	0.767912	1.51298	FBN3	nonsynonymous SNV	FBN3:NM_001321431:exon12:c.G1418A:p.R473Q,FBN3:NM_032447:exon12:c.G1418A:p.R473Q	0.0228	0.084	5.106	-3.13	EGF-like calcium-binding domain|EGF-like domain|EGF-like, conserved site
19:8203113:C:T	rs35999680	19	8203113	C	T	T	0.6663	1.078	0.767912	1.51298	FBN3	nonsynonymous SNV	FBN3:NM_001321431:exon10:c.G1113A:p.M371I,FBN3:NM_032447:exon10:c.G1113A:p.M371I	0.0227	0	7.418	2.56	.
9:133927878:A:G	rs10901333	9	133927878	A	G	G	0.6665	1.018	0.937705	1.10552	LAMC3	nonsynonymous SNV	LAMC3:NM_006059:exon10:c.A1631G:p.E544G	0.4746	0.022	19.11	4.25	Laminin IV
12:43828141:T:A	rs7302446	12	43828141	T	A	A	0.6679	1.054	0.829344	1.33793	ADAMTS20	nonsynonymous SNV	ADAMTS20:NM_025003:exon19:c.A2627T:p.K876M	0.0286	0.988	23.7	3.72	.
9:91994433:C:T	rs45464494	9	91994433	C	T	C	0.6681	1.03306	0.890511	1.19957	SEMA4D	nonsynonymous SNV	SEMA4D:NM_006378:exon18:c.G1775A:p.G592D	0.0876	0	0.823	3.07	Immunoglobulin|Immunoglobulin subtype|Immunoglobulin-like domain|Immunoglobulin-like fold
19:19329924:C:T	rs2228603	19	19329924	C	T	C	0.6684	1.03413	0.886176	1.20785	NCAN	nonsynonymous SNV	NCAN:NM_004386:exon3:c.C274T:p.P92S	0.0712	0.957	23.6	4.66	Immunoglobulin V-set domain|Immunoglobulin subtype|Immunoglobulin-like domain|Immunoglobulin-like fold
12:10251445:C:G	rs2306894	12	10251445	C	G	C	0.6687	1.02775	0.90625	1.16467	CLEC1A	nonsynonymous SNV	CLEC1A:NM_001297748:exon1:c.G77C:p.G26A,CLEC1A:NM_001297749:exon1:c.G77C:p.G26A,CLEC1A:NM_016511:exon1:c.G77C:p.G26A	0.8841	0	0.021	4.66	.
15:89398605:G:T	rs938608	15	89398605	G	T	G	0.6689	1.01937	0.932245	1.11646	ACAN	nonsynonymous SNV	ACAN:NM_001135:exon12:c.G2789T:p.S930I,ACAN:NM_013227:exon12:c.G2789T:p.S930I	0.6331	0.967	18.18	-3.45	.
5:168212951:A:G	rs891921	5	168212951	A	G	G	0.6694	1.03	0.899209	1.1785	SLIT3	nonsynonymous SNV	SLIT3:NM_001271946:exon12:c.T1112C:p.V371A,SLIT3:NM_003062:exon12:c.T1112C:p.V371A	0.8963	0	22.6	6.04	Leucine-rich repeat domain, L domain-like
12:43822171:G:A	rs7310011	12	43822171	G	A	A	0.6697	1.053	0.830971	1.33531	ADAMTS20	nonsynonymous SNV	ADAMTS20:NM_025003:exon26:c.C3818T:p.S1273F	0.0287	0.105	15.1	4.94	.
12:43826204:C:T	rs7297737	12	43826204	C	T	T	0.6698	1.053	0.830971	1.33531	ADAMTS20	nonsynonymous SNV	ADAMTS20:NM_025003:exon21:c.G2999A:p.R1000H	0.0285	0.015	14.01	-1.3	.
17:77044046:G:A	rs35035542	17	77044046	G	A	A	0.6709	1.066	0.796092	1.42766	C1QTNF1	nonsynonymous SNV	C1QTNF1:NM_198594:exon3:c.G476A:p.R159Q,C1QTNF1:NM_030968:exon4:c.G722A:p.R241Q,C1QTNF1:NM_153372:exon4:c.G722A:p.R241Q,C1QTNF1:NM_198593:exon4:c.G722A:p.R241Q	0.0174	0	0.016	-8.39	C1q domain|Tumour necrosis factor-like domain
1:152193162:C:T	rs41266136	1	152193162	C	T	C	0.671	1.0661	0.792185	1.43184	HRNR	nonsynonymous SNV	HRNR:NM_001009931:exon3:c.G943A:p.G315S	0.0208	0.052	0.095	-7.8	.
7:75442730:T:G	rs2302006	7	75442730	T	G	T	0.671	1.02354	0.920498	1.13751	CCL24	nonsynonymous SNV	CCL24:NM_002991:exon2:c.A85C:p.I29L	0.1946	0.004	0.868	-0.408	Chemokine interleukin-8-like domain
11:102575379:T:C	rs61754772	11	102575379	T	C	T	0.6717	1.05932	0.810941	1.38204	MMP27	nonsynonymous SNV	MMP27:NM_022122:exon2:c.A230G:p.K77R	0.0263	0	8.502	0.479	Metallopeptidase, catalytic domain|Peptidoglycan binding-like
20:23424638:C:T	rs3746737	20	23424638	C	T	C	0.6722	1.03306	0.887027	1.20428	CSTL1	nonsynonymous SNV	CSTL1:NM_138283:exon3:c.C287T:p.T96M	0.0796	0.786	0.379	-7.84	Cystatin domain
10:115348046:G:A	rs7080536	10	115348046	G	A	G	0.6729	1.04603	0.849795	1.28757	HABP2	nonsynonymous SNV	HABP2:NM_001177660:exon13:c.G1523A:p.G508E,HABP2:NM_004132:exon13:c.G1601A:p.G534E	0.0351	1	26.4	5.93	Peptidase S1, PA clan|Serine proteases, trypsin domain
6:160969629:A:G	rs1801693	6	160969629	A	G	A	0.6731	1.02041	0.928597	1.12084	LPA	nonsynonymous SNV	LPA:NM_005577:exon32:c.T5036C:p.M1679T	0.6841	0.053	0.001	0.732	Kringle|Kringle, conserved site|Kringle-like fold
1:160851826:A:T	rs2274907	1	160851826	A	T	T	0.6732	1.019	0.93314	1.11316	ITLN1	nonsynonymous SNV	ITLN1:NM_017625:exon4:c.T326A:p.V109D	0.6757	0	9.859	4.17	Fibrinogen, alpha/beta/gamma chain, C-terminal globular domain|Fibrinogen, alpha/beta/gamma chain, C-terminal globular, subdomain 1
5:82834299:G:A	rs188703	5	82834299	G	A	G	0.6739	1.01833	0.935869	1.10769	VCAN	nonsynonymous SNV	VCAN:NM_001164097:exon7:c.G2516A:p.R839H,VCAN:NM_004385:exon8:c.G5477A:p.R1826H	0.3821	0.347	13.49	0.253	.
10:81318663:C:G	rs17886395	10	81318663	C	G	G	0.6739	1.036	0.880135	1.21857	SFTPA2	nonsynonymous SNV	SFTPA2:NM_001320814:exon3:c.G301C:p.A101P,SFTPA2:NM_001098668:exon4:c.G271C:p.A91P,SFTPA2:NM_001320813:exon4:c.G271C:p.A91P	0.15	0	0.003	1.62	.
18:6993673:T:C	rs62081533	18	6993673	T	C	T	0.6745	1.02145	0.924077	1.12858	LAMA1	nonsynonymous SNV	LAMA1:NM_005559:exon35:c.A4975G:p.I1659V	0.1994	0	0.006	-3.46	Laminin alpha, domain I
13:24895437:G:A	rs202198487	13	24895437	G	A	A	0.6748	1.036	0.880135	1.21857	C1QTNF9	nonsynonymous SNV	C1QTNF9:NM_001303138:exon4:c.G533A:p.R178Q,C1QTNF9:NM_178540:exon4:c.G533A:p.R178Q,C1QTNF9:NM_001303137:exon5:c.G533A:p.R178Q	0.0983	0.054	29.6	3.1	.
6:32035603:C:T	rs9469081	6	32035603	C	T	T	0.675	1.03	0.896587	1.18431	TNXB	nonsynonymous SNV	TNXB:NM_019105:exon18:c.G6379A:p.V2127M	0.0923	0.907	25.3	-0.987	Fibronectin type III|Immunoglobulin-like fold
17:7462969:A:G	rs3803800	17	7462969	A	G	G	0.6754	1.022	0.924077	1.12858	TNFSF12-TNFSF13;TNFSF13	nonsynonymous SNV	TNFSF13:NM_003808:exon2:c.A287G:p.N96S,TNFSF13:NM_172087:exon2:c.A287G:p.N96S,TNFSF13:NM_172088:exon2:c.A287G:p.N96S,TNFSF12-TNFSF13:NM_172089:exon7:c.A527G:p.N176S	0.7756	0.002	9.081	2.35	.
14:94936062:G:A	rs45438596	14	94936062	G	A	G	0.6758	1.05708	0.814094	1.37119	SERPINA9	nonsynonymous SNV	SERPINA9:NM_001042518:exon2:c.C170T:p.T57I,SERPINA9:NM_175739:exon2:c.C170T:p.T57I	0.0285	0.007	12.08	-7.98	Serpin domain
17:34328461:A:G	rs854625	17	34328461	A	G	A	0.6762	1.04493	0.85228	1.28125	CCL15	nonsynonymous SNV	CCL15:NM_032965:exon1:c.T71C:p.I24T	0.9496	.	.	.	.
2:98853173:G:A	rs11889349	2	98853173	G	A	A	0.6765	1.018	0.936768	1.10442	VWA3B	nonsynonymous SNV	VWA3B:NM_001345864:exon13:c.G1624A:p.V542M,VWA3B:NM_144992:exon19:c.G2653A:p.V885M	0.5178	0.029	0.412	0.946	.
15:89400339:A:C	rs2882676	15	89400339	A	C	A	0.6766	1.01937	0.931313	1.11534	ACAN	nonsynonymous SNV	ACAN:NM_001135:exon12:c.A4523C:p.E1508A,ACAN:NM_013227:exon12:c.A4523C:p.E1508A	0.6368	0.58	4.077	-2.06	.
12:6061559:C:T	rs7962217	12	6061559	C	T	T	0.677	1.037	0.87501	1.23062	VWF	nonsynonymous SNV	VWF:NM_000552:exon49:c.G8113A:p.G2705R	0.0524	1	33	5.45	.
3:186959295:C:T	rs28945068	3	186959295	C	T	C	0.6773	1.06838	0.780672	1.4617	MASP1	nonsynonymous SNV	MASP1:NM_001879:exon10:c.G1277A:p.G426E,MASP1:NM_139125:exon10:c.G1277A:p.G426E	0.0166	0.075	2.997	3.06	Peptidase S1, PA clan|Sushi/SCR/CCP domain;Sushi/SCR/CCP domain
18:61570529:C:G	rs6104	18	61570529	C	G	G	0.6784	1.021	0.92589	1.12637	SERPINB2	nonsynonymous SNV	SERPINB2:NM_002575:exon8:c.C1238G:p.S413C,SERPINB2:NM_001143818:exon9:c.C1238G:p.S413C	0.216	0.003	0.008	1.29	Serpin domain
10:98924600:G:A	rs41307074	10	98924600	G	A	A	0.6785	1.042	0.858095	1.26496	SLIT1	nonsynonymous SNV	SLIT1:NM_003061:exon2:c.C245T:p.A82V	0.0721	0.015	21.1	0.704	Leucine-rich repeat domain, L domain-like
18:61564394:A:G	rs6098	18	61564394	A	G	G	0.6792	1.021	0.92589	1.12637	SERPINB2	nonsynonymous SNV	SERPINB2:NM_002575:exon4:c.A358G:p.N120D,SERPINB2:NM_001143818:exon5:c.A358G:p.N120D	0.2152	0	7.993	4.13	Serpin domain
7:123514896:G:T	rs6949082	7	123514896	G	T	T	0.68	1.023	0.919578	1.13637	HYAL4	nonsynonymous SNV	HYAL4:NM_012269:exon4:c.G1036T:p.A346S	0.1884	0	10.21	4.89	Aldolase-type TIM barrel|Glycoside hydrolase superfamily
14:77944624:T:C	rs149849326	14	77944624	T	C	T	0.68	1.07181	0.768588	1.49661	ISM2	nonsynonymous SNV	ISM2:NM_199296:exon6:c.A1159G:p.K387E	0.0172	0.009	0.653	4.02	.
19:8436164:C:T	rs1044250	19	8436164	C	T	C	0.6801	1.01833	0.93314	1.11316	ANGPTL4	nonsynonymous SNV	ANGPTL4:NM_001039667:exon5:c.C683T:p.T228M,ANGPTL4:NM_139314:exon6:c.C797T:p.T266M	0.3212	0.129	9.957	-1.27	Fibrinogen, alpha/beta/gamma chain, C-terminal globular domain|Fibrinogen, alpha/beta/gamma chain, C-terminal globular, subdomain 1
4:88536818:A:G	rs62642443	4	88536818	A	G	A	0.6807	1.02041	0.92589	1.12637	DSPP	nonsynonymous SNV	DSPP:NM_014208:exon5:c.A3004G:p.N1002D	0.3191	.	6.132	.	.
14:94933473:C:A	rs28618118	14	94933473	C	A	A	0.6809	1.019	0.93314	1.11316	SERPINA9	nonsynonymous SNV	SERPINA9:NM_001284275:exon3:c.G821T:p.R274I,SERPINA9:NM_175739:exon3:c.G929T:p.R310I,SERPINA9:NM_001042518:exon4:c.G629T:p.R210I,SERPINA9:NM_001284276:exon4:c.G482T:p.R161I	0.2927	0.004	23.3	2.57	Serpin domain
12:10163375:C:A	rs1359082	12	10163375	C	A	C	0.681	1.01833	0.934036	1.10987	CLEC12B	nonsynonymous SNV	CLEC12B:NM_001129998:exon1:c.C17A:p.T6N,CLEC12B:NM_205852:exon1:c.C17A:p.T6N	0.4025	1	22.3	4.88	.
3:130190720:AT:A	rs11355796	3	130190720	AT	A	AT	0.6812	1.02145	0.922267	1.13079	COL6A5	frameshift deletion	COL6A5:NM_001278298:exon40:c.7770delT:p.H2590fs	0.8039	.	.	.	.
14:94933695:G:A	rs17090921	14	94933695	G	A	A	0.6813	1.019	0.932207	1.11204	SERPINA9	nonsynonymous SNV	SERPINA9:NM_001284275:exon3:c.C599T:p.P200L,SERPINA9:NM_175739:exon3:c.C707T:p.P236L,SERPINA9:NM_001042518:exon4:c.C407T:p.P136L,SERPINA9:NM_001284276:exon4:c.C260T:p.P87L	0.293	0.168	14.35	1.87	Serpin domain
7:107599806:C:T	rs35710474	7	107599806	C	T	C	0.682	1.0352	0.874975	1.22576	LAMB1	nonsynonymous SNV	LAMB1:NM_002291:exon20:c.G2578A:p.G860S	0.0531	0.999	35	5.55	Laminin EGF domain
1:208252777:G:C	rs17011882	1	208252777	G	C	C	0.6834	1.062	0.79759	1.41363	PLXNA2	nonsynonymous SNV	PLXNA2:NM_025179:exon12:c.C2414G:p.A805G	0.0218	0.004	17.53	4.66	.
2:227946893:C:G	rs1800516	2	227946893	C	G	C	0.6834	1.04712	0.837411	1.30923	COL4A4	nonsynonymous SNV	COL4A4:NM_000092:exon23:c.G1634C:p.G545A	0.0315	1	25.1	5.34	.
8:120431506:G:A	rs11538929	8	120431506	G	A	A	0.6834	1.028	0.900937	1.17154	NOV	nonsynonymous SNV	NOV:NM_002514:exon4:c.G698A:p.R233H	0.1303	0.048	18.78	-0.365	.
19:7795727:T:A	rs36064197	19	7795727	T	A	T	0.684	1.14286	0.598218	2.18104	CLEC4G	nonsynonymous SNV	CLEC4G:NM_001244856:exon5:c.A266T:p.Q89L,CLEC4G:NM_198492:exon5:c.A302T:p.Q101L	0.0112	0.001	7.103	1.92	.
8:139749799:G:T	rs10111520	8	139749799	G	T	G	0.6862	1.04384	0.846437	1.28752	COL22A1	nonsynonymous SNV	COL22A1:NM_152888:exon23:c.C2107A:p.P703T	0.0663	0.073	7.467	-1.25	Concanavalin A-like lectin/glucanase domain|Laminin G domain
18:61570503:C:G	rs6103	18	61570503	C	G	G	0.6864	1.021	0.924077	1.12858	SERPINB2	nonsynonymous SNV	SERPINB2:NM_002575:exon8:c.C1212G:p.N404K,SERPINB2:NM_001143818:exon9:c.C1212G:p.N404K	0.2157	0	0.004	-2.38	Serpin domain
10:70856852:G:A	rs2229498	10	70856852	G	A	G	0.6865	1.02354	0.915102	1.14422	SRGN	nonsynonymous SNV	SRGN:NM_002727:exon2:c.G92A:p.R31Q,SRGN:NM_001321053:exon3:c.G92A:p.R31Q	0.8474	0.12	10.45	-0.986	.
11:1094680:G:T	rs41359254	11	1094680	G	T	G	0.6867	1.11732	0.64799	1.92684	MUC2	nonsynonymous SNV	MUC2:NM_002457:exon32:c.G5768T:p.G1923V	0.039	.	.	.	.
6:159650978:A:G	rs509648	6	159650978	A	G	G	0.687	1.02	0.926779	1.12304	FNDC1	nonsynonymous SNV	FNDC1:NM_032532:exon10:c.A1312G:p.T438A	0.2368	0	0.048	0.856	Fibronectin type III|Immunoglobulin-like fold
5:168180081:C:T	rs10036727	5	168180081	C	T	C	0.6875	1.01729	0.936768	1.10442	SLIT3	nonsynonymous SNV	SLIT3:NM_001271946:exon18:c.G1852A:p.G618S,SLIT3:NM_003062:exon18:c.G1852A:p.G618S	0.5218	0	21.4	5.34	Leucine-rich repeat domain, L domain-like
20:43926573:C:T	rs2227275	20	43926573	C	T	T	0.6876	1.019	0.927669	1.11972	MATN4	nonsynonymous SNV	MATN4:NM_030592:exon6:c.G1318A:p.G440S,MATN4:NM_030590:exon7:c.G1441A:p.G481S,MATN4:NM_003833:exon9:c.G1564A:p.G522S	0.2495	0.002	19.59	4.64	von Willebrand factor, type A
1:152191696:G:C	rs34188717	1	152191696	G	C	G	0.6879	1.06157	0.789812	1.42755	HRNR	nonsynonymous SNV	HRNR:NM_001009931:exon3:c.C2409G:p.S803R	0.0205	0.002	0.88	0.421	.
14:94933640:A:T	rs28583900	14	94933640	A	T	T	0.6881	1.019	0.930382	1.11423	SERPINA9	nonsynonymous SNV	SERPINA9:NM_001284275:exon3:c.T654A:p.H218Q,SERPINA9:NM_175739:exon3:c.T762A:p.H254Q,SERPINA9:NM_001042518:exon4:c.T462A:p.H154Q,SERPINA9:NM_001284276:exon4:c.T315A:p.H105Q	0.2929	0	0.001	-6.94	Serpin domain
13:39424253:C:G	rs9548506	13	39424253	C	G	C	0.6889	1.02669	0.900937	1.17154	FREM2	nonsynonymous SNV	FREM2:NM_207361:exon9:c.C6458G:p.T2153S	0.1087	0	0.464	3.13	Na-Ca exchanger/integrin-beta4
7:107671407:C:G	rs2528693	7	107671407	C	G	C	0.689	1.03627	0.869011	1.23664	LAMB4	nonsynonymous SNV	LAMB4:NM_001318046:exon32:c.G4836C:p.R1612S,LAMB4:NM_007356:exon32:c.G4836C:p.R1612S	0.0513	0.003	0.5	-2.7	Laminin IV type B
3:194061906:T:C	rs4974538	3	194061906	T	C	T	0.6894	1.03306	0.8801	1.21376	CPN2	nonsynonymous SNV	CPN2:NM_001080513:exon2:c.A1526G:p.Q509R,CPN2:NM_001291988:exon2:c.A1526G:p.Q509R	0.8191	0	0.001	2.61	.
14:73726151:A:G	rs17182244	14	73726151	A	G	G	0.6898	1.052	0.822835	1.34313	PAPLN	nonsynonymous SNV	PAPLN:NM_173462:exon15:c.A1802G:p.H601R	0.0455	0.001	0.002	-5.49	.
6:32010272:T:A	rs76250508	6	32010272	T	A	T	0.6904	1.02145	0.922267	1.13079	TNXB	nonsynonymous SNV	TNXB:NM_032470:exon9:c.A1457T:p.N486I,TNXB:NM_019105:exon40:c.A12164T:p.N4055I	0.3398	0.989	22.4	3.29	EGF-like domain|EGF-like, conserved site;Fibrinogen, alpha/beta/gamma chain, C-terminal globular domain|Fibrinogen, alpha/beta/gamma chain, C-terminal globular, subdomain 1
3:130174334:G:A	rs819085	3	130174334	G	A	A	0.6912	1.039	0.858885	1.25624	COL6A5	nonsynonymous SNV	COL6A5:NM_001278298:exon37:c.G6614A:p.G2205D,COL6A5:NM_153264:exon37:c.G6614A:p.G2205D	0.9538	0	2.959	1.81	.
6:112460365:C:T	rs41289902	6	112460365	C	T	C	0.6914	1.07643	0.747097	1.54892	LAMA4	nonsynonymous SNV	LAMA4:NM_001105206:exon24:c.G3239A:p.R1080Q,LAMA4:NM_001105207:exon24:c.G3218A:p.R1073Q,LAMA4:NM_002290:exon24:c.G3218A:p.R1073Q	0.0135	1	35	5.98	Concanavalin A-like lectin/glucanase domain|Laminin G domain
3:130110550:A:G	rs11917356	3	130110550	A	G	A	0.6917	1.02354	0.91331	1.14646	COL6A5	nonsynonymous SNV	COL6A5:NM_001278298:exon7:c.A2945G:p.D982G,COL6A5:NM_153264:exon7:c.A2945G:p.D982G	0.1478	0.021	8.764	5.62	von Willebrand factor, type A
5:127873094:G:A	rs62390671	5	127873094	G	A	A	0.6919	1.04	0.858061	1.25996	FBN2	nonsynonymous SNV	FBN2:NM_001999:exon1:c.C203T:p.A68V	0.052	0	15.39	2.94	.
3:195507086:C:G	rs79944988	3	195507086	C	G	G	0.6923	1.029	0.893937	1.18545	MUC4	nonsynonymous SNV	MUC4:NM_018406:exon2:c.G11365C:p.D3789H	0.0215	0.162	0.06	.	.
3:167506937:C:G	rs33917740	3	167506937	C	G	C	0.6924	1.03093	0.885255	1.20187	SERPINI1	nonsynonymous SNV	SERPINI1:NM_001122752:exon2:c.C21G:p.F7L,SERPINI1:NM_005025:exon2:c.C21G:p.F7L	0.0914	0	8.458	1.81	.
1:22191454:G:A	rs897471	1	22191454	G	A	A	0.6936	1.019	0.92856	1.11641	HSPG2	nonsynonymous SNV	HSPG2:NM_001291860:exon36:c.C4511T:p.A1504V,HSPG2:NM_005529:exon36:c.C4508T:p.A1503V	0.7329	1	23.3	4.37	Laminin IV
6:76640803:G:A	rs10943299	6	76640803	G	A	G	0.6942	1.02354	0.909737	1.15096	IMPG1	nonsynonymous SNV	IMPG1:NM_001282368:exon14:c.C1876T:p.R626W,IMPG1:NM_001563:exon15:c.C2110T:p.R704W	0.1478	0	0.033	-7.59	EGF-like domain
10:81917486:T:C	rs1802932	10	81917486	T	C	T	0.6946	1.07527	0.74635	1.54738	ANXA11	nonsynonymous SNV	ANXA11:NM_001157:exon14:c.A1369G:p.I457V,ANXA11:NM_145868:exon15:c.A1369G:p.I457V,ANXA11:NM_001278407:exon16:c.A1369G:p.I457V,ANXA11:NM_001278408:exon16:c.A1369G:p.I457V,ANXA11:NM_001278409:exon16:c.A1270G:p.I424V,ANXA11:NM_145869:exon16:c.A1369G:p.I457V	0.0123	0.284	17.77	5.17	Annexin repeat, conserved site
2:98809432:T:C	rs74735968	2	98809432	T	C	T	0.6952	1.0352	0.870681	1.22934	VWA3B	nonsynonymous SNV	VWA3B:NM_001345864:exon5:c.T509C:p.I170T,VWA3B:NM_144992:exon11:c.T1538C:p.I513T	0.0579	1	24.5	5.5	von Willebrand factor, type A
2:113832333:C:A	rs6743376	2	113832333	C	A	C	0.6965	1.01729	0.931276	1.11093	IL1F10	nonsynonymous SNV	IL1F10:NM_032556:exon3:c.C152A:p.A51D,IL1F10:NM_173161:exon4:c.C152A:p.A51D	0.617	0	12.1	3.91	.
1:152281691:G:A	rs36006086	1	152281691	G	A	G	0.6967	1.05485	0.804544	1.38193	FLG	nonsynonymous SNV	FLG:NM_002016:exon3:c.C5671T:p.R1891W	0.0208	1	24.2	-1.3	.
12:6128443:T:C	rs216311	12	6128443	T	C	C	0.6967	1.02	0.92404	1.12412	VWF	nonsynonymous SNV	VWF:NM_000552:exon28:c.A4141G:p.T1381A	0.6017	0	0.001	0.201	von Willebrand factor, type A
1:152281745:G:T	rs62623409	1	152281745	G	T	G	0.697	1.05485	0.804544	1.38193	FLG	nonsynonymous SNV	FLG:NM_002016:exon3:c.C5617A:p.Q1873K	0.0208	0.127	1.678	1.56	.
15:90764702:C:T	rs61761864	15	90764702	C	T	T	0.6975	1.095	0.695086	1.72585	SEMA4B	nonsynonymous SNV	SEMA4B:NM_001324029:exon6:c.C467T:p.T156I	0.0115	.	.	.	.
1:152281317:G:T	rs71626704	1	152281317	G	T	G	0.6979	1.05485	0.804544	1.38193	FLG	nonsynonymous SNV	FLG:NM_002016:exon3:c.C6045A:p.D2015E	0.0208	0.576	12.11	2.04	.
5:82837631:G:T	rs160277	5	82837631	G	T	G	0.6984	1.01729	0.934933	1.10659	VCAN	nonsynonymous SNV	VCAN:NM_001164097:exon7:c.G5848T:p.D1950Y,VCAN:NM_004385:exon8:c.G8809T:p.D2937Y	0.381	0.987	23.3	0.819	.
1:186101539:A:G	rs10911825	1	186101539	A	G	G	0.6987	1.019	0.926742	1.1186	HMCN1	nonsynonymous SNV	HMCN1:NM_031935:exon86:c.A13310G:p.Q4437R	0.2665	0.735	24.5	5.37	Immunoglobulin-like domain|Immunoglobulin-like fold
19:8159339:G:C	rs34167077	19	8159339	G	C	G	0.6987	1.02669	0.898274	1.17267	FBN3	nonsynonymous SNV	FBN3:NM_001321431:exon47:c.C5896G:p.H1966D,FBN3:NM_032447:exon47:c.C5896G:p.H1966D	0.1025	0.312	12.44	2.4	EGF-like calcium-binding domain|EGF-like domain|EGF-like, conserved site|Growth factor receptor cysteine-rich domain
8:31497672:G:A	rs113317778	8	31497672	G	A	A	0.6991	1.027	0.897412	1.17614	NRG1	nonsynonymous SNV	NRG1:NM_013962:exon1:c.G172A:p.G58R	0.1321	0	23.6	1.36	Immunoglobulin I-set|Immunoglobulin subtype 2|Immunoglobulin-like domain|Immunoglobulin-like fold
1:152282794:G:A	rs12750081	1	152282794	G	A	G	0.6995	1.05485	0.802968	1.38464	FLG	nonsynonymous SNV	FLG:NM_002016:exon3:c.C4568T:p.T1523I	0.0206	0.388	12.76	-0.111	.
1:152282910:G:C	rs71626706	1	152282910	G	C	G	0.7009	1.05485	0.802968	1.38464	FLG	nonsynonymous SNV	FLG:NM_002016:exon3:c.C4452G:p.D1484E	0.0209	0	0.35	-5.51	.
1:53535493:C:G	rs41313375	1	53535493	C	G	G	0.7023	1.099	0.679635	1.77571	PODN	nonsynonymous SNV	PODN:NM_153703:exon2:c.C110G:p.P37R,PODN:NM_001199081:exon3:c.C53G:p.P18R,PODN:NM_001199080:exon4:c.C53G:p.P18R	0.0147	0.005	0.007	-5.76	.
7:123508328:A:G	rs12672205	7	123508328	A	G	G	0.7037	1.047	0.829245	1.32212	HYAL4	nonsynonymous SNV	HYAL4:NM_012269:exon3:c.A1G:p.M1V	0.029	0.002	18.82	2.83	.
3:129305460:C:T	rs2301572	3	129305460	C	T	C	0.7041	1.04603	0.828416	1.3208	PLXND1	nonsynonymous SNV	PLXND1:NM_015103:exon3:c.G1591A:p.G531S	0.0302	0.068	10.29	1.17	Sema domain|WD40/YVTN repeat-like-containing domain
10:127705856:T:C	rs41303603	10	127705856	T	C	T	0.7043	1.05708	0.792059	1.40934	ADAM12	nonsynonymous SNV	ADAM12:NM_001288973:exon23:c.A2713G:p.I905V,ADAM12:NM_003474:exon23:c.A2722G:p.I908V	0.0299	0	0.002	-5.37	.
1:152277554:G:A	rs35621145	1	152277554	G	A	G	0.7056	1.05374	0.801396	1.38736	FLG	nonsynonymous SNV	FLG:NM_002016:exon3:c.C9808T:p.R3270C	0.021	0.998	17.89	-3.06	.
21:19770562:T:C	rs2824804	21	19770562	T	C	T	0.7059	1.02987	0.885219	1.19712	TMPRSS15	nonsynonymous SNV	TMPRSS15:NM_002772:exon2:c.A230G:p.K77R	0.0841	0.016	4.755	2.76	SEA domain
3:129284818:A:C	rs2625973	3	129284818	A	C	A	0.7061	1.02041	0.919542	1.13188	PLXND1	nonsynonymous SNV	PLXND1:NM_015103:exon24:c.T4234G:p.L1412V	0.2617	0.98	20.7	2.2	Plexin, cytoplasmic RasGAP domain|Rho GTPase activation protein
2:228102723:G:C	rs13424243	2	228102723	G	C	G	0.7078	1.01626	0.933999	1.10548	COL4A3	nonsynonymous SNV	COL4A3:NM_000091:exon2:c.G127C:p.G43R	0.3384	1	24.5	4.31	.
20:6759115:A:T	rs235768	20	6759115	A	T	A	0.7088	1.01937	0.922231	1.12632	BMP2	nonsynonymous SNV	BMP2:NM_001200:exon3:c.A570T:p.R190S	0.6127	0.978	25.3	5.72	Transforming growth factor-beta, N-terminal
1:152193605:C:T	rs12741518	1	152193605	C	T	C	0.7091	1.05708	0.78896	1.41487	HRNR	nonsynonymous SNV	HRNR:NM_001009931:exon3:c.G500A:p.G167D	0.0207	0.971	4.319	1.22	.
6:32056580:A:C	rs204900	6	32056580	A	C	C	0.7092	1.027	0.893008	1.17958	TNXB	nonsynonymous SNV	TNXB:NM_019105:exon6:c.T2761G:p.S921A	0.0921	0.032	20.3	5.39	Fibronectin type III|Immunoglobulin-like fold
2:70033584:C:T	rs2228203	2	70033584	C	T	C	0.7119	1.01937	0.919542	1.13188	ANXA4	nonsynonymous SNV	ANXA4:NM_001153:exon5:c.C260T:p.T87M,ANXA4:NM_001320702:exon5:c.C8T:p.T3M,ANXA4:NM_001320698:exon7:c.C260T:p.T87M	0.2056	0.023	7.507	-1.3	.
1:152285181:G:T	rs7512779	1	152285181	G	T	G	0.712	1.05263	0.800595	1.38597	FLG	nonsynonymous SNV	FLG:NM_002016:exon3:c.C2181A:p.H727Q	0.0209	0.367	0.002	-7.77	.
7:149503916:GGATA:G	rs72359812	7	149503916	GGATA	G	GGATA	0.7123	1.02249	0.906178	1.15548	SSPO	frameshift deletion	SSPO:NM_198455:exon59:c.8745delG:p.G2915fs	0.1583	.	.	.	.
6:30954245:T:C	rs1634730	6	30954245	T	C	C	0.7124	1.019	0.920425	1.12853	MUC21	nonsynonymous SNV	MUC21:NM_001010909:exon2:c.T293C:p.V98A	0.7176	0	0.002	-1.98	Tandem-repeating region of mucin, epiglycanin-like
19:8168545:C:T	rs33967815	19	8168545	C	T	T	0.7124	1.016	0.93217	1.10765	FBN3	nonsynonymous SNV	FBN3:NM_001321431:exon39:c.G4840A:p.G1614S,FBN3:NM_032447:exon39:c.G4840A:p.G1614S	0.3271	1	25.8	3.61	EGF-like calcium-binding domain|EGF-like calcium-binding, conserved site|EGF-like domain
3:124627024:T:G	rs1127233	3	124627024	T	G	G	0.7129	1.018	0.926742	1.1186	MUC13	nonsynonymous SNV	MUC13:NM_033049:exon11:c.A1506C:p.R502S	0.2447	0	0.077	0.97	.
1:183184690:C:T	rs11586699	1	183184690	C	T	T	0.7132	1.027	0.890404	1.1854	LAMC2	nonsynonymous SNV	LAMC2:NM_005562:exon3:c.C371T:p.T124M,LAMC2:NM_018891:exon3:c.C371T:p.T124M	0.0766	0.999	26.8	4.27	Laminin EGF domain
22:31679110:G:C	rs2040533	22	31679110	G	C	C	0.7137	1.018	0.926742	1.1186	PIK3IP1	nonsynonymous SNV	PIK3IP1:NM_052880:exon6:c.C752G:p.T251S	0.6978	0	0.002	1.32	.
6:66042231:T:G	rs12207746	6	66042231	T	G	G	0.7148	1.036	0.857992	1.25002	EYS	nonsynonymous SNV	EYS:NM_001142801:exon12:c.A1846C:p.I616L	0.0615	0.762	4.019	1.01	.
3:186390627:C:T	rs9898	3	186390627	C	T	C	0.7151	1.01626	0.93217	1.10765	HRG	nonsynonymous SNV	HRG:NM_000412:exon5:c.C610T:p.P204S	0.3199	0	3.461	4.35	Cystatin domain
2:9630541:G:A	rs55796712	2	9630541	G	A	G	0.7156	1.06045	0.770682	1.46006	ADAM17	nonsynonymous SNV	ADAM17:NM_003183:exon19:c.C2240T:p.S747L	0.0149	0	13.62	3.26	.
4:119273712:C:G	rs13119545	4	119273712	C	G	C	0.7159	1.01729	0.929452	1.11311	PRSS12	nonsynonymous SNV	PRSS12:NM_003619:exon1:c.G164C:p.R55T	0.6394	0.02	14.18	1.31	.
1:152284424:G:C	rs12756586	1	152284424	G	C	G	0.7166	1.05152	0.799795	1.38458	FLG	nonsynonymous SNV	FLG:NM_002016:exon3:c.C2938G:p.H980D	0.0214	0	0.001	-6.61	.
9:14819370:G:T	rs7023244	9	14819370	G	T	T	0.7167	1.018	0.926742	1.1186	FREM1	nonsynonymous SNV	FREM1:NM_144966:exon15:c.C2408A:p.S803Y	0.2366	0.995	23.8	5.86	.
3:100712249:T:C	rs3732895	3	100712249	T	C	T	0.718	1.02145	0.908827	1.14981	ABI3BP	nonsynonymous SNV	ABI3BP:NM_001349329:exon1:c.A1G:p.M1V,ABI3BP:NM_001349330:exon1:c.A1G:p.M1V,ABI3BP:NM_001349331:exon1:c.A1G:p.M1V,ABI3BP:NM_001349332:exon1:c.A1G:p.M1V,ABI3BP:NM_015429:exon1:c.A1G:p.M1V	0.1368	0	15.88	3.73	.
2:96795857:T:C	rs749458	2	96795857	T	C	T	0.7186	1.01833	0.921309	1.1252	ASTL	nonsynonymous SNV	ASTL:NM_001002036:exon7:c.A665G:p.Q222R	0.8079	0	0.308	-1.91	Metallopeptidase, catalytic domain|Peptidase M12A, astacin|Peptidase, metallopeptidase
8:39537626:A:G	rs35980210	8	39537626	A	G	A	0.7196	1.06724	0.745515	1.52757	ADAM18	nonsynonymous SNV	ADAM18:NM_001320313:exon15:c.A1630G:p.T544A,ADAM18:NM_014237:exon16:c.A1702G:p.T568A	0.0121	0	0.143	0.119	ADAM, cysteine-rich
6:66005888:C:T	rs9342464	6	66005888	C	T	C	0.7198	1.01523	0.934896	1.10221	EYS	nonsynonymous SNV	EYS:NM_001142800:exon12:c.G1891A:p.G631S,EYS:NM_001292009:exon12:c.G1891A:p.G631S	0.5865	0	4.109	1.71	.
1:103491461:T:G	rs12731843	1	103491461	T	G	G	0.72	1.034	0.860501	1.24389	COL11A1	nonsynonymous SNV	COL11A1:NM_080629:exon6:c.A828C:p.K276N	0.057	0	16.01	0.879	.
8:98943598:C:T	rs2290472	8	98943598	C	T	T	0.72	1.02	0.916824	1.13297	MATN2	nonsynonymous SNV	MATN2:NM_001317748:exon3:c.C560T:p.T187M,MATN2:NM_002380:exon3:c.C560T:p.T187M,MATN2:NM_030583:exon3:c.C560T:p.T187M	0.1696	0.998	31	5.97	von Willebrand factor, type A
8:52232487:G:T	rs1052704	8	52232487	G	T	G	0.721	1.01729	0.927632	1.1153	PXDNL	nonsynonymous SNV	PXDNL:NM_144651:exon23:c.C4356A:p.D1452E	0.257	0.008	1.68	-0.13	.
1:152282684:G:A	rs151103850	1	152282684	G	A	G	0.7214	1.05932	0.770651	1.45429	FLG	nonsynonymous SNV	FLG:NM_002016:exon3:c.C4678T:p.R1560C	0.0436	0.983	22.9	0.342	.
19:9026247:T:C	rs78941910	19	9026247	T	C	C	0.7215	1.055	0.786628	1.41623	MUC16	nonsynonymous SNV	MUC16:NM_024690:exon14:c.A36739G:p.M12247V	0.0251	0.684	0.021	1.48	SEA domain
3:130346185:A:G	rs141836516	3	130346185	A	G	A	0.7217	1.05708	0.777462	1.43867	COL6A6	nonsynonymous SNV	COL6A6:NM_001102608:exon25:c.A4964G:p.Y1655C	0.0188	0.947	23.3	4.03	.
15:51689772:G:A	rs17648128	15	51689772	G	A	G	0.722	1.01626	0.93217	1.10765	GLDN	nonsynonymous SNV	GLDN:NM_001330297:exon6:c.G422A:p.S141N,GLDN:NM_181789:exon6:c.G794A:p.S265N	0.3659	0	16.36	4.05	.
5:156917340:A:C	rs10067096	5	156917340	A	C	C	0.7229	1.019	0.919505	1.12741	ADAM19	nonsynonymous SNV	ADAM19:NM_033274:exon19:c.T2218G:p.S740A	0.206	0.417	11.95	4.24	.
16:77359919:A:T	rs11640912	16	77359919	A	T	A	0.723	1.01523	0.931238	1.10654	ADAMTS18	nonsynonymous SNV	ADAMTS18:NM_001326358:exon13:c.T1360A:p.L454I,ADAMTS18:NM_199355:exon13:c.T1876A:p.L626I	0.3903	0.015	23.6	4.83	.
13:39422624:C:T	rs9548505	13	39422624	C	T	C	0.7247	1.02354	0.899101	1.16458	FREM2	nonsynonymous SNV	FREM2:NM_207361:exon8:c.C6196T:p.R2066C	0.1096	0.999	35	5.66	Na-Ca exchanger/integrin-beta4
1:150484844:A:T	rs151102225	1	150484844	A	T	T	0.7249	1.091	0.673572	1.76678	ECM1	nonsynonymous SNV	ECM1:NM_022664:exon7:c.A725T:p.D242V,ECM1:NM_001202858:exon8:c.A1181T:p.D394V,ECM1:NM_004425:exon8:c.A1100T:p.D367V	0.0112	1	24.8	4.64	Serum albumin-like
19:10088271:C:G	rs2161468	19	10088271	C	G	G	0.7255	1.017	0.926705	1.11418	COL5A3	nonsynonymous SNV	COL5A3:NM_015719:exon42:c.G3125C:p.R1042P	0.4084	0.018	11.43	2.68	.
6:30993377:T:A	rs3094672	6	30993377	T	A	A	0.7258	1.021	0.9097	1.14642	MUC22	nonsynonymous SNV	MUC22:NM_001198815:exon3:c.T169A:p.S57T,MUC22:NM_001318484:exon3:c.T178A:p.S60T,MUC22:NM_001322469:exon3:c.T178A:p.S60T	0.7488	.	0.172	2.01	.
5:38370537:T:C	rs1465567	5	38370537	T	C	T	0.7262	1.01937	0.916824	1.13297	EGFLAM	nonsynonymous SNV	EGFLAM:NM_001205301:exon6:c.T685C:p.W229R,EGFLAM:NM_152403:exon6:c.T685C:p.W229R	0.183	0	2.969	-2.02	Fibronectin type III|Immunoglobulin-like fold
10:116032519:A:G	rs597371	10	116032519	A	G	G	0.7262	1.015	0.934896	1.10221	VWA2	nonsynonymous SNV	VWA2:NM_001272046:exon6:c.A392G:p.E131G,VWA2:NM_001320804:exon6:c.A392G:p.E131G	0.4517	0	6.935	4.28	von Willebrand factor, type A
3:194061907:G:A	rs4974539	3	194061907	G	A	A	0.7287	1.016	0.930345	1.10982	CPN2	stopgain	CPN2:NM_001080513:exon2:c.C1525T:p.Q509X,CPN2:NM_001291988:exon2:c.C1525T:p.Q509X	0.3894	.	25.4	-4.38	.
5:82833369:A:G	rs309559	5	82833369	A	G	A	0.7291	1.0142	0.933962	1.10111	VCAN	nonsynonymous SNV	VCAN:NM_001164097:exon7:c.A1586G:p.K529R,VCAN:NM_004385:exon8:c.A4547G:p.K1516R	0.4934	0.019	0.037	2.79	.
1:22313103:C:G	rs114895362	1	22313103	C	G	G	0.7298	1.064	0.749132	1.5111	CELA3B	nonsynonymous SNV	CELA3B:NM_007352:exon7:c.C722G:p.A241G	0.0149	0	1.684	3.1	Peptidase S1, PA clan|Serine proteases, trypsin domain
19:8176640:C:T	rs12975322	19	8176640	C	T	C	0.7298	1.01729	0.924003	1.11968	FBN3	nonsynonymous SNV	FBN3:NM_001321431:exon32:c.G3976A:p.V1326I,FBN3:NM_032447:exon32:c.G3976A:p.V1326I	0.2439	0.557	10.54	1.72	EGF-like calcium-binding domain|EGF-like calcium-binding, conserved site|EGF-like domain|Growth factor receptor cysteine-rich domain
1:151108137:T:G	rs4971007	1	151108137	T	G	T	0.7328	1.01833	0.915907	1.13183	SEMA6C	nonsynonymous SNV	SEMA6C:NM_001178062:exon13:c.A1243C:p.T415P,SEMA6C:NM_001178061:exon14:c.A1363C:p.T455P,SEMA6C:NM_030913:exon14:c.A1363C:p.T455P	0.7963	0	17.17	4.64	Sema domain|WD40/YVTN repeat-like-containing domain
2:98844674:C:G	rs7601049	2	98844674	C	G	C	0.733	1.01523	0.933065	1.10438	VWA3B	nonsynonymous SNV	VWA3B:NM_001345864:exon9:c.C1000G:p.L334V,VWA3B:NM_144992:exon15:c.C2029G:p.L677V	0.5883	0.319	0.085	-5.07	von Willebrand factor, type A
11:67132804:G:A	rs78755659	11	67132804	G	A	A	0.7336	1.084	0.682795	1.72213	CLCF1	nonsynonymous SNV	CLCF1:NM_001166212:exon3:c.C451T:p.P151S,CLCF1:NM_013246:exon3:c.C481T:p.P161S	0.0139	0.853	22.9	4.27	Four-helical cytokine, core|Four-helical cytokine-like, core
7:44144284:C:A	rs28362521	7	44144284	C	A	A	0.7342	1.054	0.780454	1.42174	AEBP1	nonsynonymous SNV	AEBP1:NM_001129:exon1:c.C20A:p.A7E	0.0225	0.499	25.3	3.38	.
18:57026361:A:G	rs33926449	18	57026361	A	G	A	0.7354	1.02564	0.884299	1.1912	LMAN1	nonsynonymous SNV	LMAN1:NM_005570:exon1:c.T116C:p.V39A	0.081	0	0.002	-5.14	.
12:6153534:T:C	rs1063856	12	6153534	T	C	T	0.7355	1.01523	0.931238	1.10654	VWF	nonsynonymous SNV	VWF:NM_000552:exon18:c.A2365G:p.T789A	0.3628	0	7.75	2.17	Trypsin Inhibitor-like, cysteine rich domain
14:73711394:A:G	rs2280792	14	73711394	A	G	G	0.7355	1.024	0.892972	1.17492	PAPLN	nonsynonymous SNV	PAPLN:NM_173462:exon3:c.A97G:p.S33G	0.1317	0	17.39	5.1	.
9:95179179:C:T	rs34860658	9	95179179	C	T	C	0.7362	1.0352	0.847114	1.26354	OMD	nonsynonymous SNV	OMD:NM_005014:exon2:c.G662A:p.S221N	0.0404	0	2.087	1.87	Leucine-rich repeat domain, L domain-like
6:76631823:C:T	rs76604824	6	76631823	C	T	C	0.7365	1.07066	0.717602	1.59654	IMPG1	nonsynonymous SNV	IMPG1:NM_001282368:exon16:c.G2143A:p.D715N,IMPG1:NM_001563:exon17:c.G2377A:p.D793N	0.0154	0.845	24.2	3.7	.
10:54531242:G:A	rs5030737	10	54531242	G	A	A	0.7377	1.027	0.879115	1.19822	MBL2	nonsynonymous SNV	MBL2:NM_000242:exon1:c.C154T:p.R52C	0.0726	1	33	3.07	.
10:81926702:G:A	rs1049550	10	81926702	G	A	A	0.7377	1.014	0.933962	1.10111	ANXA11	nonsynonymous SNV	ANXA11:NM_001157:exon6:c.C688T:p.R230C,ANXA11:NM_145868:exon7:c.C688T:p.R230C,ANXA11:NM_001278407:exon8:c.C688T:p.R230C,ANXA11:NM_001278408:exon8:c.C688T:p.R230C,ANXA11:NM_001278409:exon8:c.C589T:p.R197C,ANXA11:NM_145869:exon8:c.C688T:p.R230C	0.4178	1	34	4.35	Annexin repeat, conserved site
8:73982161:A:G	rs2291219	8	73982161	A	G	A	0.7382	1.01523	0.929415	1.10871	SBSPON	nonsynonymous SNV	SBSPON:NM_153225:exon4:c.T556C:p.W186R	0.6965	0	0.068	3.22	.
12:6173433:C:T	rs1800377	12	6173433	C	T	C	0.7388	1.02249	0.896444	1.1657	VWF	nonsynonymous SNV	VWF:NM_000552:exon12:c.G1411A:p.V471I	0.1198	0.016	9.971	-2.9	von Willebrand factor, type D domain
10:93668140:T:C	rs11186740	10	93668140	T	C	T	0.7389	1.06383	0.737477	1.53498	FGFBP3	nonsynonymous SNV	FGFBP3:NM_152429:exon2:c.A587G:p.K196R	0.0124	0.005	0.715	-0.645	.
11:60637164:C:T	rs489172	11	60637164	C	T	T	0.7391	1.019	0.913237	1.13742	ZP1	nonsynonymous SNV	ZP1:NM_207341:exon3:c.C473T:p.T158I	0.7948	0.061	2.519	1.19	.
8:52233408:C:T	rs7827446	8	52233408	C	T	C	0.74	1.01523	0.926705	1.11418	PXDNL	nonsynonymous SNV	PXDNL:NM_144651:exon22:c.G4196A:p.R1399K	0.2569	0	3.089	0.646	VWFC domain
15:84700108:C:T	rs35633782	15	84700108	C	T	C	0.7405	1.07643	0.694169	1.67036	ADAMTSL3	nonsynonymous SNV	ADAMTSL3:NM_001301110:exon28:c.C4678T:p.R1560C,ADAMTSL3:NM_207517:exon28:c.C4678T:p.R1560C	0.0153	0	25	3.28	.
4:88898941:C:T	rs11728697	4	88898941	C	T	T	0.7408	1.014	0.932133	1.10327	SPP1	nonsynonymous SNV	SPP1:NM_001251830:exon4:c.C71T:p.A24V	0.5662	.	.	.	.
1:39957979:A:G	rs76039610	1	39957979	A	G	A	0.7413	1.06724	0.723916	1.57315	BMP8A	nonsynonymous SNV	BMP8A:NM_181809:exon1:c.A316G:p.M106V	0.0103	0.482	19.8	3.24	Transforming growth factor-beta, N-terminal
3:186395113:A:G	rs2228243	3	186395113	A	G	G	0.7413	1.017	0.918586	1.12628	HRG	nonsynonymous SNV	HRG:NM_000412:exon7:c.A1019G:p.H340R	0.1968	0.652	0.006	-1.9	.
11:102576375:G:A	rs1939015	11	102576375	G	A	G	0.7428	1.01937	0.907883	1.14412	MMP27	nonsynonymous SNV	MMP27:NM_022122:exon1:c.C71T:p.T24M	0.854	0.002	0.063	-1.96	Metallopeptidase, catalytic domain|Peptidoglycan binding-like
1:22200473:C:T	rs28546127	1	22200473	C	T	T	0.7429	1.041	0.817847	1.32456	HSPG2	nonsynonymous SNV	HSPG2:NM_001291860:exon29:c.G3691A:p.G1231S,HSPG2:NM_005529:exon29:c.G3688A:p.G1230S	0.0285	1	25.8	3.62	Laminin EGF domain
15:89398631:T:A	rs938609	15	89398631	T	A	T	0.7431	1.01523	0.927595	1.11089	ACAN	nonsynonymous SNV	ACAN:NM_001135:exon12:c.T2815A:p.S939T,ACAN:NM_013227:exon12:c.T2815A:p.S939T	0.6325	0.992	16.1	1.18	.
2:238244963:A:G	rs6728818	2	238244963	A	G	A	0.7433	1.0142	0.932133	1.10327	COL6A3	nonsynonymous SNV	COL6A3:NM_057166:exon37:c.T6959C:p.M2320T,COL6A3:NM_057167:exon39:c.T8162C:p.M2721T,COL6A3:NM_004369:exon40:c.T8780C:p.M2927T	0.6493	0	3.838	2.21	von Willebrand factor, type A
10:7780646:C:G	rs3740217	10	7780646	C	G	C	0.7433	1.02881	0.86717	1.2196	ITIH2	nonsynonymous SNV	ITIH2:NM_002216:exon16:c.C2020G:p.P674A	0.0729	0.002	3.622	5.23	.
5:38407060:C:T	rs138323038	5	38407060	C	T	T	0.7436	1.051	0.780422	1.41612	EGFLAM	nonsynonymous SNV	EGFLAM:NM_182798:exon3:c.C257T:p.T86M,EGFLAM:NM_001205301:exon8:c.C959T:p.T320M,EGFLAM:NM_152403:exon8:c.C959T:p.T320M	0.0149	0.951	17.8	1.78	Fibronectin type III|Immunoglobulin-like fold
1:175046826:G:A	rs41266078	1	175046826	G	A	A	0.744	1.039	0.827489	1.3039	TNN	nonsynonymous SNV	TNN:NM_022093:exon2:c.G272A:p.R91H	0.0378	0.837	22.9	4.6	.
6:30997079:G:A	rs140778074	6	30997079	G	A	G	0.7446	1.07643	0.687399	1.68681	MUC22	nonsynonymous SNV	MUC22:NM_001198815:exon3:c.G3871A:p.A1291T,MUC22:NM_001318484:exon3:c.G3880A:p.A1294T,MUC22:NM_001322469:exon3:c.G3880A:p.A1294T	0.0136	.	2.207	-3.92	.
7:44153780:A:G	rs13928	7	44153780	A	G	A	0.7454	1.01317	0.933962	1.10111	AEBP1	nonsynonymous SNV	AEBP1:NM_001129:exon21:c.A3397G:p.K1133E	0.4658	0	0.282	3.7	Peptidase M14, carboxypeptidase A
11:102595492:G:A	rs3765620	11	102595492	G	A	G	0.7458	1.0142	0.933962	1.10111	MMP8	nonsynonymous SNV	MMP8:NM_002424:exon1:c.C95T:p.T32I	0.5469	0	0.022	0.964	Metallopeptidase, catalytic domain|Peptidoglycan binding-like
4:88412806:T:C	rs1130643	4	88412806	T	C	C	0.7462	1.02	0.903463	1.15202	SPARCL1	nonsynonymous SNV	SPARCL1:NM_001291977:exon3:c.A880G:p.T294A,SPARCL1:NM_004684:exon5:c.A1255G:p.T419A,SPARCL1:NM_001128310:exon6:c.A1255G:p.T419A,SPARCL1:NM_001291976:exon6:c.A880G:p.T294A	0.1166	0.001	0.002	-4.28	.
1:22160020:C:T	rs17459097	1	22160020	C	T	T	0.7474	1.029	0.864642	1.22561	HSPG2	nonsynonymous SNV	HSPG2:NM_001291860:exon79:c.G10921A:p.V3641I,HSPG2:NM_005529:exon79:c.G10918A:p.V3640I	0.06	0.028	14.89	1.02	Concanavalin A-like lectin/glucanase domain|Immunoglobulin I-set|Immunoglobulin subtype 2|Immunoglobulin-like domain|Immunoglobulin-like fold
19:8159362:G:T	rs7245429	19	8159362	G	T	G	0.7476	1.0142	0.932133	1.10327	FBN3	nonsynonymous SNV	FBN3:NM_001321431:exon47:c.C5873A:p.P1958H,FBN3:NM_032447:exon47:c.C5873A:p.P1958H	0.4066	0.958	24.9	1.38	EGF-like calcium-binding domain|EGF-like domain|EGF-like, conserved site|Growth factor receptor cysteine-rich domain
11:102651313:G:C	rs17435959	11	102651313	G	C	C	0.7495	1.039	0.821026	1.31416	MMP10	nonsynonymous SNV	MMP10:NM_002425:exon1:c.C10G:p.L4V	0.0404	0.914	21	1.59	.
14:75017900:C:A	rs137854857	14	75017900	C	A	C	0.7498	1.06496	0.719643	1.57617	LTBP2	nonsynonymous SNV	LTBP2:NM_000428:exon7:c.G1553T:p.S518I	0.0154	0.01	16.71	2.7	.
8:17739538:T:C	rs3739406	8	17739538	T	C	C	0.7507	1.014	0.928486	1.1076	FGL1	nonsynonymous SNV	FGL1:NM_004467:exon3:c.A214G:p.I72V,FGL1:NM_147203:exon3:c.A214G:p.I72V,FGL1:NM_201552:exon4:c.A214G:p.I72V,FGL1:NM_201553:exon4:c.A214G:p.I72V	0.6715	0.001	0.002	-2.95	.
9:91994101:G:A	rs62638726	9	91994101	G	A	G	0.7524	1.02775	0.866303	1.21838	SEMA4D	nonsynonymous SNV	SEMA4D:NM_006378:exon18:c.C2107T:p.P703S	0.0653	0.008	0.002	0.315	.
19:9084299:T:C	rs1609458	19	9084299	T	C	T	0.7526	1.01317	0.933028	1.10001	MUC16	nonsynonymous SNV	MUC16:NM_024690:exon1:c.A7516G:p.T2506A	0.52	0.927	0.02	0.225	.
6:32036788:C:T	rs17207923	6	32036788	C	T	C	0.7528	1.04822	0.781141	1.40635	TNXB	nonsynonymous SNV	TNXB:NM_019105:exon16:c.G5713A:p.E1905K	0.0193	0.906	23.1	-1.95	Fibronectin type III|Immunoglobulin-like fold
21:46876619:T:C	rs114463382	21	46876619	T	C	C	0.7528	1.057	0.749042	1.49326	COL18A1	nonsynonymous SNV	COL18A1:NM_130444:exon1:c.T1175C:p.L392P	0.0345	1	12.88	3.96	Frizzled domain
18:61582751:T:G	rs17072097	18	61582751	T	G	G	0.7536	1.017	0.916787	1.12849	SERPINB10	nonsynonymous SNV	SERPINB10:NM_005024:exon2:c.T7G:p.S3A	0.1836	0.001	0.001	0.577	Serpin domain
3:195508796:C:G	rs370175156	3	195508796	C	G	G	0.7537	1.019	0.904331	1.14862	MUC4	nonsynonymous SNV	MUC4:NM_018406:exon2:c.G9655C:p.V3219L	0.1189	0.1	0.211	-0.846	.
16:78064733:C:A	rs2072663	16	78064733	C	A	C	0.7542	1.01937	0.901694	1.15428	CLEC3A	nonsynonymous SNV	CLEC3A:NM_001244755:exon2:c.C433A:p.Q145K,CLEC3A:NM_005752:exon3:c.C616A:p.Q206K	0.1339	0.001	13.73	3.85	.
7:131883311:C:T	rs62622406	7	131883311	C	T	T	0.7543	1.055	0.757115	1.4685	PLXNA4	nonsynonymous SNV	PLXNA4:NM_020911:exon13:c.G2671A:p.A891T	0.0195	0.709	21.5	5.94	IPT domain|Immunoglobulin E-set|Immunoglobulin-like fold
7:100550428:C:A	rs4729627	7	100550428	C	A	A	0.7546	1.022	0.893794	1.16682	MUC3A	nonsynonymous SNV	MUC3A:NM_005960:exon2:c.C1009A:p.P337T	0.1909	.	.	.	.
17:6981397:A:G	rs90951	17	6981397	A	G	A	0.7562	1.01523	0.923966	1.11525	CLEC10A	nonsynonymous SNV	CLEC10A:NM_001330070:exon3:c.T103C:p.C35R,CLEC10A:NM_006344:exon3:c.T103C:p.C35R,CLEC10A:NM_182906:exon3:c.T103C:p.C35R	0.3523	0.003	0.073	-0.382	Hepatic lectin, N-terminal
8:97614625:G:A	rs3816208	8	97614625	G	A	A	0.7568	1.026	0.872249	1.20765	SDC2	nonsynonymous SNV	SDC2:NM_002998:exon3:c.G175A:p.A59T	0.0653	0.018	22.9	4.15	.
7:149475926:G:A	rs17754559	7	149475926	G	A	G	0.757	1.06045	0.729526	1.54243	SSPO	nonsynonymous SNV	SSPO:NM_198455:exon7:c.G892A:p.V298M	0.0135	0.994	14.1	1.41	von Willebrand factor, type D domain
11:57381989:G:A	rs4926	11	57381989	G	A	A	0.757	1.015	0.923966	1.11525	SERPING1	nonsynonymous SNV	SERPING1:NM_001032295:exon7:c.G1438A:p.V480M,SERPING1:NM_000062:exon8:c.G1438A:p.V480M	0.2932	0.048	23.5	-0.867	Serpin domain;Serpin domain|Serpin, conserved site
1:20671961:G:A	rs11582960	1	20671961	G	A	G	0.7574	1.0142	0.926668	1.10978	VWA5B1	nonsynonymous SNV	VWA5B1:NM_001039500:exon17:c.G2639A:p.R880H	0.3165	1	33	5.28	.
4:88536316:TAGC:T	rs143008261	4	88536316	TAGC	T	T	0.7574	1.022	0.891188	1.17257	DSPP	nonframeshift deletion	DSPP:NM_014208:exon5:c.2503_2505del:p.835_835del	0.1259	.	.	.	.
1:109261509:A:G	rs17553619	1	109261509	A	G	G	0.7575	1.025	0.877358	1.19583	FNDC7	nonsynonymous SNV	FNDC7:NM_001144937:exon4:c.A436G:p.I146V	0.0734	0.001	11.24	0.75	Fibronectin type III|Immunoglobulin-like fold
11:1272167:C:T	rs4963058	11	1272167	C	T	T	0.7592	1.042	0.799635	1.35744	MUC5B	nonsynonymous SNV	MUC5B:NM_002458:exon31:c.C14057T:p.T4686M	0.0807	0.987	6.714	-0.969	.
10:81701722:T:C	rs2243639	10	81701722	T	C	C	0.7593	1.013	0.931201	1.10217	SFTPD	nonsynonymous SNV	SFTPD:NM_003019:exon5:c.A538G:p.T180A	0.6073	0	0.003	-3.79	.
3:64672474:A:T	rs36115950	3	64672474	A	T	T	0.76	1.04	0.809062	1.33627	ADAMTS9	nonsynonymous SNV	ADAMTS9:NM_001318781:exon2:c.T286A:p.S96T,ADAMTS9:NM_182920:exon2:c.T286A:p.S96T	0.0263	0.002	8.976	0.91	Peptidase M12B, propeptide
7:12391268:T:TA	rs11454536	7	12391268	T	TA	T	0.7607	1.02145	0.892044	1.16911	VWDE	stopgain	VWDE:NM_001346972:exon17:c.3471dupT:p.K1158_E1159delinsX,VWDE:NM_001346973:exon17:c.3006dupT:p.K1003_E1004delinsX,VWDE:NM_001135924:exon19:c.3816dupT:p.K1273_E1274delinsX	0.0968	.	.	.	.
3:167189607:A:C	rs17246389	3	167189607	A	C	A	0.761	1.0142	0.923043	1.11414	SERPINI2	nonsynonymous SNV	SERPINI2:NM_006217:exon2:c.T16G:p.L6V,SERPINI2:NM_001012303:exon3:c.T46G:p.L16V	0.2576	0.608	5.107	-1.41	Serpin domain
14:55604935:C:A	rs4644	14	55604935	C	A	C	0.7623	1.01317	0.931201	1.10217	LGALS3	nonsynonymous SNV	LGALS3:NM_001177388:exon3:c.C191A:p.P64H,LGALS3:NM_002306:exon3:c.C191A:p.P64H	0.4227	1	23.1	5.65	.
11:1265450:A:C	rs201530286	11	1265450	A	C	A	0.7626	1.05152	0.759299	1.45552	MUC5B	nonsynonymous SNV	MUC5B:NM_002458:exon31:c.A7340C:p.E2447A	0.0407	0	0.002	-5.19	.
12:51737562:T:C	rs17860300	12	51737562	T	C	T	0.7628	1.01317	0.928486	1.1076	CELA1	nonsynonymous SNV	CELA1:NM_001971:exon3:c.A175G:p.M59V	0.2767	0.011	12.05	-0.799	Peptidase S1, PA clan|Serine proteases, trypsin domain
10:54531235:C:T	rs1800450	10	54531235	C	T	T	0.7637	1.018	0.905199	1.14522	MBL2	nonsynonymous SNV	MBL2:NM_000242:exon1:c.G161A:p.G54D	0.1414	1	28.9	3.99	.
14:55611839:A:T	rs11125	14	55611839	A	T	A	0.7641	1.02354	0.879924	1.18996	LGALS3	nonsynonymous SNV	LGALS3:NM_002306:exon6:c.A603T:p.Q201H	0.0782	0.999	23.4	2.37	Concanavalin A-like lectin/glucanase domain|Galectin, carbohydrate recognition domain
18:57026436:C:T	rs1043302	18	57026436	C	T	T	0.7642	1.053	0.751924	1.47568	LMAN1	nonsynonymous SNV	LMAN1:NM_005570:exon1:c.G41A:p.R14Q	0.0482	0.007	17.82	2.3	.
3:102157417:A:G	rs6784389	3	102157417	A	G	G	0.7644	1.017	0.909628	1.13737	ZPLD1	nonsynonymous SNV	ZPLD1:NM_175056:exon2:c.A134G:p.N45S,ZPLD1:NM_001329788:exon3:c.A86G:p.N29S	0.1653	0.047	9.361	1.48	Zona pellucida domain
3:130150310:A:C	rs61744488	3	130150310	A	C	C	0.7645	1.031	0.845388	1.25604	COL6A5	nonsynonymous SNV	COL6A5:NM_001278298:exon33:c.A5250C:p.E1750D,COL6A5:NM_153264:exon33:c.A5250C:p.E1750D	0.0426	.	0.002	-4.14	.
1:156146640:G:A	rs41265017	1	156146640	G	A	A	0.7651	1.031	0.847046	1.25358	SEMA4A	nonsynonymous SNV	SEMA4A:NM_001193302:exon13:c.G1742A:p.R581Q,SEMA4A:NM_001193300:exon15:c.G2138A:p.R713Q,SEMA4A:NM_001193301:exon15:c.G2138A:p.R713Q,SEMA4A:NM_022367:exon15:c.G2138A:p.R713Q	0.0438	0.231	21	4.16	.
8:108334162:G:T	rs141029929	8	108334162	G	T	G	0.766	1.05042	0.757812	1.45837	ANGPT1	nonsynonymous SNV	ANGPT1:NM_001314051:exon3:c.C170A:p.T57K,ANGPT1:NM_001146:exon4:c.C770A:p.T257K,ANGPT1:NM_001199859:exon4:c.C770A:p.T257K	0.019	0.788	24.1	5.36	.
18:61602360:G:A	rs35453062	18	61602360	G	A	G	0.7665	1.02041	0.892901	1.16565	SERPINB10	nonsynonymous SNV	SERPINB10:NM_005024:exon8:c.G1078A:p.D360N	0.1033	0	0.002	-10.1	Serpin domain
6:32017173:G:C	rs41270450	6	32017173	G	C	C	0.7666	1.032	0.837177	1.27344	TNXB	nonsynonymous SNV	TNXB:NM_019105:exon28:c.C9625G:p.R3209G	0.0455	0.065	6.184	4.43	Fibronectin type III|Immunoglobulin-like fold
19:9062415:T:G	rs12978757	19	9062415	T	G	T	0.767	1.01215	0.933028	1.10001	MUC16	nonsynonymous SNV	MUC16:NM_024690:exon3:c.A25031C:p.D8344A	0.6116	0	0.026	-5	.
3:102157365:A:T	rs6784362	3	102157365	A	T	T	0.7681	1.017	0.909628	1.13737	ZPLD1	nonsynonymous SNV	ZPLD1:NM_175056:exon2:c.A82T:p.I28F,ZPLD1:NM_001329788:exon3:c.A34T:p.I12F	0.1654	0	15.7	3.81	.
11:121000774:T:C	rs520805	11	121000774	T	C	C	0.7688	1.015	0.920351	1.11963	TECTA	nonsynonymous SNV	TECTA:NM_005422:exon9:c.T2795C:p.V932A	0.2275	0.003	9.957	4.65	Uncharacterised domain, cysteine-rich
3:102181131:A:G	rs12054046	3	102181131	A	G	G	0.7689	1.017	0.909628	1.13737	ZPLD1	nonsynonymous SNV	ZPLD1:NM_175056:exon6:c.A637G:p.T213A,ZPLD1:NM_001329788:exon7:c.A589G:p.T197A	0.1657	0.037	15.45	4.09	Zona pellucida domain
7:76054372:G:A	rs2286428	7	76054372	G	A	A	0.7689	1.014	0.921235	1.11632	ZP3	nonsynonymous SNV	ZP3:NM_001110354:exon1:c.G91A:p.G31R	0.2165	0.294	9.513	3.48	.
12:6127891:C:A	rs1800385	12	6127891	C	A	A	0.7691	1.03	0.845388	1.25604	VWF	nonsynonymous SNV	VWF:NM_000552:exon28:c.G4693T:p.V1565L	0.0837	0	9.034	1.87	von Willebrand factor, type A
3:49721532:G:A	rs3197999	3	49721532	G	A	G	0.7718	1.01317	0.924853	1.11196	MST1	nonsynonymous SNV	MST1:NM_020998:exon18:c.C2107T:p.R703C	0.2757	0.727	25.5	-2.82	Peptidase S1, PA clan|Serine proteases, trypsin domain
3:184099050:C:T	rs34095724	3	184099050	C	T	T	0.7718	1.059	0.718866	1.56218	CHRD	nonsynonymous SNV	CHRD:NM_001304472:exon3:c.C280T:p.P94S,CHRD:NM_003741:exon3:c.C280T:p.P94S	0.0335	0	12.5	4.3	VWFC domain
12:49360147:G:A	rs35034312	12	49360147	G	A	A	0.7719	1.043	0.784899	1.38569	WNT10B	nonsynonymous SNV	WNT10B:NM_003394:exon5:c.C901T:p.P301S	0.0155	0.027	13.05	4.43	.
18:6985270:C:T	rs11664063	18	6985270	C	T	C	0.772	1.0142	0.923043	1.11414	LAMA1	nonsynonymous SNV	LAMA1:NM_005559:exon39:c.G5626A:p.A1876T	0.247	0.152	11.36	-0.587	.
1:186113727:G:A	rs6693069	1	186113727	G	A	G	0.7726	1.05042	0.752616	1.46551	HMCN1	nonsynonymous SNV	HMCN1:NM_031935:exon91:c.G14158A:p.A4720T	0.0118	0	0.063	-0.545	.
21:28302355:A:G	rs226794	21	28302355	A	G	A	0.7729	1.01937	0.892901	1.16565	ADAMTS5	nonsynonymous SNV	ADAMTS5:NM_007038:exon7:c.T2075C:p.L692P	0.8857	0	7.032	5.97	.
1:226075708:A:G	rs145431393	1	226075708	A	G	A	0.7731	1.0352	0.815365	1.31537	LEFTY1	nonsynonymous SNV	LEFTY1:NM_020997:exon2:c.T275C:p.L92S	0.0358	0	7.731	3.3	.
5:38412674:C:T	rs16903965	5	38412674	C	T	C	0.7732	1.02041	0.891152	1.16794	EGFLAM	nonsynonymous SNV	EGFLAM:NM_182798:exon6:c.C716T:p.T239M,EGFLAM:NM_001205301:exon11:c.C1418T:p.T473M,EGFLAM:NM_152403:exon11:c.C1418T:p.T473M	0.1181	0.995	22.9	5.16	Concanavalin A-like lectin/glucanase domain|Laminin G domain;Fibronectin type III
17:37295935:G:T	rs114494148	17	37295935	G	T	G	0.774	1.05597	0.728739	1.52873	PLXDC1	nonsynonymous SNV	PLXDC1:NM_020405:exon2:c.C227A:p.T76K	0.0247	0.015	18.33	4.41	.
7:45960645:G:C	rs2854746	7	45960645	G	C	C	0.7759	1.014	0.923043	1.11414	IGFBP3	nonsynonymous SNV	IGFBP3:NM_000598:exon1:c.C95G:p.A32G,IGFBP3:NM_001013398:exon1:c.C95G:p.A32G	0.3864	0.006	0.598	0.626	.
3:184103903:A:C	rs16858780	3	184103903	A	C	C	0.7764	1.016	0.910501	1.13401	CHRD	nonsynonymous SNV	CHRD:NM_001304472:exon15:c.A1888C:p.M630L,CHRD:NM_001304474:exon15:c.A778C:p.M260L,CHRD:NM_003741:exon15:c.A1888C:p.M630L,CHRD:NM_001304473:exon16:c.A778C:p.M260L	0.1732	0	0.091	1.11	CHRD
1:186024643:G:A	rs12067376	1	186024643	G	A	G	0.7779	1.04932	0.748922	1.46979	HMCN1	nonsynonymous SNV	HMCN1:NM_031935:exon45:c.G6981A:p.M2327I	0.0112	0.001	8.846	3.54	Immunoglobulin I-set|Immunoglobulin subtype 2|Immunoglobulin-like domain|Immunoglobulin-like fold
3:130311398:C:T	rs73868925	3	130311398	C	T	T	0.7781	1.021	0.881615	1.18294	COL6A6	nonsynonymous SNV	COL6A6:NM_001102608:exon13:c.C4286T:p.A1429V	0.0725	0.002	11.33	0.884	.
10:100017453:T:G	rs1983864	10	100017453	T	G	G	0.7782	1.012	0.928449	1.10323	LOXL4	nonsynonymous SNV	LOXL4:NM_032211:exon8:c.A1214C:p.D405A	0.3449	1	32	5.55	SRCR domain|SRCR-like domain
3:183957218:C:T	rs113200353	3	183957218	C	T	C	0.7784	1.04167	0.784115	1.38431	VWA5B2	nonsynonymous SNV	VWA5B2:NM_001320373:exon12:c.C1585T:p.H529Y,VWA5B2:NM_138345:exon14:c.C2239T:p.H747Y	0.0226	0.021	5.264	0.708	.
6:112493872:A:G	rs1050348	6	112493872	A	G	A	0.7791	1.01215	0.932096	1.09891	LAMA4	nonsynonymous SNV	LAMA4:NM_001105206:exon12:c.T1492C:p.Y498H,LAMA4:NM_001105207:exon12:c.T1471C:p.Y491H,LAMA4:NM_002290:exon12:c.T1471C:p.Y491H	0.602	0	2.212	4.63	Laminin alpha, domain I
3:130129322:G:C	rs35886424	3	130129322	G	C	C	0.7792	1.018	0.900757	1.14857	COL6A5	nonsynonymous SNV	COL6A5:NM_001278298:exon20:c.G4616C:p.S1539T,COL6A5:NM_153264:exon20:c.G4616C:p.S1539T	0.1209	0	10.2	4.84	.
10:116045796:G:A	rs79009215	10	116045796	G	A	A	0.7814	1.052	0.735151	1.50634	VWA2	nonsynonymous SNV	VWA2:NM_001272046:exon11:c.G1096A:p.V366M,VWA2:NM_001320804:exon11:c.G1096A:p.V366M	0.0111	0.841	26.8	2.71	von Willebrand factor, type A
10:72520259:C:T	rs61573157	10	72520259	C	T	T	0.7818	1.019	0.892008	1.16449	ADAMTS14	nonsynonymous SNV	ADAMTS14:NM_080722:exon22:c.C3322T:p.P1108S,ADAMTS14:NM_139155:exon22:c.C3331T:p.P1111S	0.1035	0.002	0.054	1.59	.
4:88537198:C:A	rs200796238	4	88537198	C	A	C	0.7822	1.01626	0.903391	1.14294	DSPP	nonsynonymous SNV	DSPP:NM_014208:exon5:c.C3384A:p.D1128E	0.0113	0.517	0.577	-3.2	.
1:53544597:T:C	rs1288389	1	53544597	T	C	T	0.7842	1.01937	0.890262	1.16677	PODN	nonsynonymous SNV	PODN:NM_153703:exon8:c.T1559C:p.V520A,PODN:NM_001199081:exon9:c.T1502C:p.V501A,PODN:NM_001199080:exon10:c.T1502C:p.V501A	0.8893	0	0.208	3.91	Leucine-rich repeat domain, L domain-like
6:112457390:C:T	rs2032567	6	112457390	C	T	C	0.7849	1.01215	0.926631	1.10539	LAMA4	nonsynonymous SNV	LAMA4:NM_001105206:exon25:c.G3349A:p.G1117S,LAMA4:NM_001105207:exon25:c.G3328A:p.G1110S,LAMA4:NM_002290:exon25:c.G3328A:p.G1110S	0.7204	0.001	18.04	5.93	Concanavalin A-like lectin/glucanase domain|Laminin G domain
4:71339723:G:A	rs2306949	4	71339723	G	A	A	0.7851	1.015	0.909591	1.13288	MUC7	.	.	0.168	.	.	.	.
3:130290007:T:C	rs61730505	3	130290007	T	C	C	0.7863	1.036	0.805832	1.33093	COL6A6	nonsynonymous SNV	COL6A6:NM_001102608:exon6:c.T2747C:p.I916T	0.0309	0.979	25.7	4.92	von Willebrand factor, type A
10:102824292:G:A	rs11190812	10	102824292	G	A	A	0.788	1.028	0.842047	1.25598	KAZALD1	nonsynonymous SNV	KAZALD1:NM_001319303:exon4:c.G293A:p.G98D,KAZALD1:NM_030929:exon4:c.G707A:p.G236D	0.0466	0.99	29.2	5.63	Immunoglobulin I-set|Immunoglobulin subtype 2|Immunoglobulin-like domain|Immunoglobulin-like fold
4:88534065:G:A	rs3750025	4	88534065	G	A	G	0.7886	1.04167	0.77343	1.40343	DSPP	nonsynonymous SNV	DSPP:NM_014208:exon4:c.G727A:p.D243N	0.0179	0.994	23	3.74	.
7:120979089:C:T	rs2707466	7	120979089	C	T	T	0.7891	1.011	0.931164	1.09781	WNT16	nonsynonymous SNV	WNT16:NM_016087:exon4:c.C758T:p.T253I,WNT16:NM_057168:exon4:c.C788T:p.T263I	0.4712	0.003	16.85	2.66	.
15:89402051:A:G	rs1042630	15	89402051	A	G	A	0.79	1.01317	0.92212	1.11302	ACAN	nonsynonymous SNV	ACAN:NM_001135:exon12:c.A6235G:p.I2079V,ACAN:NM_013227:exon12:c.A6235G:p.I2079V	0.7387	0.023	0.001	-9.69	.
9:133954548:C:T	rs11244275	9	133954548	C	T	C	0.7922	1.02459	0.855285	1.22669	LAMC3	nonsynonymous SNV	LAMC3:NM_006059:exon23:c.C3790T:p.R1264W	0.0576	0.995	7.714	-7	.
9:34661994:G:A	rs11575584	9	34661994	G	A	G	0.7925	1.02249	0.863674	1.20993	CCL27	nonsynonymous SNV	CCL27:NM_006664:exon3:c.C286T:p.L96F	0.0647	0.001	10.17	-4.65	Chemokine interleukin-8-like domain
19:8993018:G:A	rs61742668	19	8993018	G	A	G	0.7926	1.02459	0.853611	1.2291	MUC16	nonsynonymous SNV	MUC16:NM_024690:exon67:c.C41741T:p.P13914L	0.0899	0	13.15	-1.49	.
9:113166792:A:T	rs3739451	9	113166792	A	T	A	0.7937	1.0142	0.912251	1.12732	SVEP1	nonsynonymous SNV	SVEP1:NM_153366:exon39:c.T9481A:p.F3161I	0.1949	0.006	15.93	1.62	Sushi/SCR/CCP domain
19:8191184:C:T	rs35025963	19	8191184	C	T	T	0.7939	1.012	0.924816	1.10756	FBN3	nonsynonymous SNV	FBN3:NM_001321431:exon21:c.G2602A:p.D868N,FBN3:NM_032447:exon21:c.G2602A:p.D868N	0.2904	0.117	14.53	0.768	TB domain
10:7605067:C:T	rs3824658	10	7605067	C	T	C	0.7945	1.01833	0.891117	1.16332	ITIH5	nonsynonymous SNV	ITIH5:NM_032817:exon11:c.G2165A:p.R722Q,ITIH5:NM_030569:exon15:c.G2807A:p.R936Q	0.8116	.	11.18	-6.94	.
8:74005131:A:G	rs59331088	8	74005131	A	G	A	0.7947	1.01317	0.92212	1.11302	SBSPON	nonsynonymous SNV	SBSPON:NM_153225:exon1:c.T172C:p.F58L	0.2655	0	17.13	3.25	Somatomedin B domain
9:117808721:C:T	rs61734387	9	117808721	C	T	T	0.7949	1.043	0.762159	1.42704	TNC	nonsynonymous SNV	TNC:NM_002160:exon17:c.G5093A:p.R1698Q	0.0154	1	34	4.92	Fibronectin type III|Immunoglobulin-like fold
12:51723598:A:AG	rs17860363	12	51723598	A	AG	A	0.7958	1.01215	0.926631	1.10539	CELA1	frameshift insertion	CELA1:NM_001971:exon7:c.628dupC:p.L210fs	0.2769	.	.	.	.
1:203455902:A:C	rs9439	1	203455902	A	C	A	0.7962	1.02987	0.824911	1.28464	PRELP	nonsynonymous SNV	PRELP:NM_002725:exon3:c.A1042C:p.N348H,PRELP:NM_201348:exon3:c.A1042C:p.N348H	0.0305	0.001	12.34	4.13	Leucine-rich repeat domain, L domain-like
4:110902111:A:T	rs11569017	4	110902111	A	T	A	0.7966	1.02354	0.857787	1.22067	EGF	nonsynonymous SNV	EGF:NM_001178131:exon14:c.A2225T:p.D742V,EGF:NM_001178130:exon15:c.A2351T:p.D784V,EGF:NM_001963:exon15:c.A2351T:p.D784V	0.0624	0.046	11.3	3.67	Growth factor receptor cysteine-rich domain;Growth factor receptor cysteine-rich domain|Six-bladed beta-propeller, TolB-like
17:6980273:C:T	rs16956478	17	6980273	C	T	T	0.7978	1.035	0.797176	1.3427	CLEC10A	nonsynonymous SNV	CLEC10A:NM_001330070:exon4:c.G218A:p.R73K,CLEC10A:NM_006344:exon4:c.G218A:p.R73K,CLEC10A:NM_182906:exon4:c.G218A:p.R73K	0.0234	0.48	4.85	1.74	Hepatic lectin, N-terminal
3:130190630:G:A	rs322117	3	130190630	G	A	A	0.798	1.015	0.902488	1.14179	COL6A5	nonsynonymous SNV	COL6A5:NM_001278298:exon40:c.G7679A:p.S2560N	0.8627	0	0.566	1.6	.
17:25958304:G:A	rs3751093	17	25958304	G	A	G	0.7982	1.01523	0.904259	1.13956	LGALS9	nonsynonymous SNV	LGALS9:NM_001330163:exon1:c.G13A:p.G5S,LGALS9:NM_002308:exon1:c.G13A:p.G5S,LGALS9:NM_009587:exon1:c.G13A:p.G5S	0.2138	0.009	0.101	-5.36	.
11:26586801:G:A	rs15783	11	26586801	G	A	G	0.7983	1.01112	0.929341	1.09997	MUC15	nonsynonymous SNV	MUC15:NM_145650:exon2:c.C605T:p.T202I,MUC15:NM_001135091:exon3:c.C686T:p.T229I,MUC15:NM_001135092:exon3:c.C686T:p.T229I	0.6534	0.844	23.2	2.12	.
17:25970642:A:T	rs361498	17	25970642	A	T	T	0.7983	1.02	0.87557	1.18872	LGALS9	nonsynonymous SNV	LGALS9:NM_009587:exon5:c.A536T:p.Q179L	0.2292	0.062	2.117	-0.097	.
6:32021414:C:T	rs61745355	6	32021414	C	T	T	0.8002	1.035	0.793295	1.35197	TNXB	nonsynonymous SNV	TNXB:NM_019105:exon25:c.G8536A:p.G2846R	0.0278	1	28.7	4.38	Fibronectin type III|Immunoglobulin-like fold
19:14043544:C:T	rs138402331	19	14043544	C	T	T	0.8004	1.054	0.702774	1.58205	PODNL1	nonsynonymous SNV	PODNL1:NM_001146255:exon6:c.G1240A:p.V414I,PODNL1:NM_001146254:exon8:c.G1507A:p.V503I,PODNL1:NM_024825:exon8:c.G1513A:p.V505I	0.0193	0	0.002	-3.67	Leucine-rich repeat domain, L domain-like
18:6986227:G:A	rs12607841	18	6986227	G	A	G	0.8007	1.01523	0.904259	1.13956	LAMA1	nonsynonymous SNV	LAMA1:NM_005559:exon37:c.C5288T:p.A1763V	0.1474	0.021	6.417	-6.25	Laminin alpha, domain I
19:8176945:T:C	rs4804063	19	8176945	T	C	C	0.801	1.014	0.912251	1.12732	FBN3	nonsynonymous SNV	FBN3:NM_001321431:exon31:c.A3877G:p.S1293G,FBN3:NM_032447:exon31:c.A3877G:p.S1293G	0.1811	0.001	0.022	-5.58	EGF-like calcium-binding domain|EGF-like calcium-binding, conserved site|EGF-like domain|Growth factor receptor cysteine-rich domain
6:66005857:T:A	rs17411795	6	66005857	T	A	A	0.8013	1.015	0.904259	1.13956	EYS	nonsynonymous SNV	EYS:NM_001142800:exon12:c.A1922T:p.E641V,EYS:NM_001292009:exon12:c.A1922T:p.E641V	0.2144	0.971	23.4	0.452	Growth factor receptor cysteine-rich domain
8:97614661:T:A	rs1042381	8	97614661	T	A	T	0.8021	1.01317	0.913127	1.12398	SDC2	nonsynonymous SNV	SDC2:NM_002998:exon3:c.T211A:p.S71T	0.1813	0.722	19.16	3.79	.
19:8429323:G:A	rs116843064	19	8429323	G	A	A	0.8022	1.037	0.780984	1.37878	ANGPTL4	nonsynonymous SNV	ANGPTL4:NM_001039667:exon1:c.G118A:p.E40K,ANGPTL4:NM_139314:exon1:c.G118A:p.E40K	0.0199	0.999	35	4.95	.
18:334742:C:T	rs2305027	18	334742	C	T	C	0.8024	1.01317	0.916714	1.11959	COLEC12	nonsynonymous SNV	COLEC12:NM_130386:exon6:c.G1816A:p.G606S	0.5024	1	16.82	4.5	C-type lectin fold|C-type lectin-like
1:160920966:C:T	rs6680969	1	160920966	C	T	T	0.8038	1.011	0.929341	1.09997	ITLN2	nonsynonymous SNV	ITLN2:NM_080878:exon4:c.G308A:p.R103H	0.5509	0.003	0.008	-7.71	Fibrinogen, alpha/beta/gamma chain, C-terminal globular domain|Fibrinogen, alpha/beta/gamma chain, C-terminal globular, subdomain 1
4:73181637:G:T	rs139921635	4	73181637	G	T	G	0.8039	1.03734	0.777151	1.38281	ADAMTS3	nonsynonymous SNV	ADAMTS3:NM_014243:exon11:c.C1537A:p.P513T	0.0245	0.997	28.3	5.63	.
6:33153528:C:T	rs9277934	6	33153528	C	T	C	0.8049	1.01112	0.925705	1.10429	COL11A2	nonsynonymous SNV	COL11A2:NM_080680:exon6:c.G826A:p.E276K	0.3109	0.976	15.24	3.8	.
9:119106881:C:A	rs7020782	9	119106881	C	A	A	0.805	1.012	0.921198	1.11191	PAPPA	nonsynonymous SNV	PAPPA:NM_002581:exon14:c.C3671A:p.S1224Y	0.6859	0.023	17.94	2.54	Sushi/SCR/CCP domain
9:113259152:T:G	rs10817033	9	113259152	T	G	G	0.8066	1.016	0.896336	1.15193	SVEP1	nonsynonymous SNV	SVEP1:NM_153366:exon8:c.A1743C:p.Q581H	0.1109	0.998	22.6	0.969	HYR domain
3:130116684:G:A	rs79867908	3	130116684	G	A	G	0.8079	1.02249	0.856929	1.21945	COL6A5	nonsynonymous SNV	COL6A5:NM_001278298:exon9:c.G3826A:p.V1276I,COL6A5:NM_153264:exon9:c.G3826A:p.V1276I	0.0557	0.094	3.053	2.48	von Willebrand factor, type A
7:100695140:G:A	rs6946812	7	100695140	G	A	A	0.8079	1.043	0.742272	1.4682	MUC17	nonsynonymous SNV	MUC17:NM_001040105:exon9:c.G13000A:p.D4334N	0.0103	0.106	3.795	-0.865	.
15:89399986:C:G	rs201822759	15	89399986	C	G	G	0.8081	1.034	0.787856	1.35858	ACAN	nonsynonymous SNV	ACAN:NM_001135:exon12:c.C4170G:p.D1390E,ACAN:NM_013227:exon12:c.C4170G:p.D1390E	0.0144	0.565	0.002	-5.17	.
11:9113002:A:G	rs60494098	11	9113002	A	G	A	0.8088	1.01729	0.883274	1.17131	SCUBE2	nonsynonymous SNV	SCUBE2:NM_001170690:exon1:c.T74C:p.L25P,SCUBE2:NM_001330199:exon1:c.T74C:p.L25P,SCUBE2:NM_020974:exon1:c.T74C:p.L25P	0.1633	0	18.73	-4.38	.
6:6152140:C:T	rs5987	6	6152140	C	T	T	0.8149	1.025	0.835404	1.25588	F13A1	nonsynonymous SNV	F13A1:NM_000129:exon14:c.G1951A:p.V651I	0.0526	0.285	18.93	5.37	Immunoglobulin-like fold|Transglutaminase, C-terminal
3:195495916:G:C	rs2550240	3	195495916	G	C	G	0.8154	1.01833	0.877253	1.18171	MUC4	nonsynonymous SNV	MUC4:NM_138297:exon5:c.C645G:p.N215K,MUC4:NM_004532:exon6:c.C798G:p.N266K,MUC4:NM_018406:exon7:c.C13506G:p.N4502K	0.4305	0.948	3.732	3.37	NIDO domain
3:130162395:A:G	rs9883988	3	130162395	A	G	G	0.8156	1.022	0.848572	1.23146	COL6A5	nonsynonymous SNV	COL6A5:NM_001278298:exon36:c.A6563G:p.Q2188R,COL6A5:NM_153264:exon36:c.A6563G:p.Q2188R	0.9516	0	0.002	-6.31	.
13:110959356:C:G	rs9515185	13	110959356	C	G	C	0.8162	1.01215	0.917594	1.11628	COL4A1	nonsynonymous SNV	COL4A1:NM_001303110:exon1:c.G19C:p.V7L,COL4A1:NM_001845:exon1:c.G19C:p.V7L	0.4005	0.001	6.307	1.49	.
3:195507827:G:A	rs373469782	3	195507827	G	A	A	0.8164	1.014	0.89982	1.14289	MUC4	nonsynonymous SNV	MUC4:NM_018406:exon2:c.C10624T:p.L3542F	0.0645	0.162	0.293	.	.
19:9071596:G:T	rs146343030	19	9071596	G	T	G	0.8164	1.06838	0.607453	1.87851	MUC16	nonsynonymous SNV	MUC16:NM_024690:exon3:c.C15850A:p.L5284I	0.0174	0.002	0.022	-1.84	.
3:195511993:A:G	rs3107749	3	195511993	A	G	A	0.8168	1.01317	0.904222	1.13505	MUC4	nonsynonymous SNV	MUC4:NM_018406:exon2:c.T6458C:p.V2153A	0.0593	0.613	4.567	.	.
21:19726138:G:A	rs34162864	21	19726138	G	A	G	0.8185	1.0352	0.768803	1.39504	TMPRSS15	nonsynonymous SNV	TMPRSS15:NM_002772:exon9:c.C923T:p.S308F	0.0166	1	28.9	4.46	CUB domain
19:17081707:G:T	rs9305083	19	17081707	G	T	T	0.8188	1.034	0.775599	1.38005	CPAMD8	nonsynonymous SNV	CPAMD8:NM_015692:exon18:c.C2348A:p.P783H	0.0202	0.947	0.786	-3.22	Alpha-2-macroglobulin
1:40773149:T:C	rs2228564	1	40773149	T	C	T	0.8192	1.01317	0.907774	1.13061	COL9A2	nonsynonymous SNV	COL9A2:NM_001852:exon19:c.A977G:p.Q326R	0.2198	0	4.598	5.02	.
1:12009956:G:A	rs7551175	1	12009956	G	A	A	0.8196	1.013	0.905996	1.13283	PLOD1	nonsynonymous SNV	PLOD1:NM_000302:exon3:c.G295A:p.A99T,PLOD1:NM_001316320:exon4:c.G436A:p.A146T	0.1467	0	12.95	2.9	.
1:186092103:C:T	rs41317489	1	186092103	C	T	C	0.8203	1.04058	0.739308	1.46234	HMCN1	nonsynonymous SNV	HMCN1:NM_031935:exon81:c.C12250T:p.H4084Y	0.0111	0.989	24.2	5.95	Immunoglobulin I-set|Immunoglobulin-like domain|Immunoglobulin-like fold
3:195507036:C:G	rs78811112	3	195507036	C	G	G	0.8203	1.016	0.885857	1.16556	MUC4	nonsynonymous SNV	MUC4:NM_018406:exon2:c.G11415C:p.Q3805H	0.2011	0.077	0.02	.	.
6:159590734:T:C	rs295332	6	159590734	T	C	C	0.8205	1.011	0.916677	1.11516	FNDC1	nonsynonymous SNV	FNDC1:NM_032532:exon1:c.T106C:p.S36P	0.5004	0	13.52	0.776	.
11:1266611:G:C	rs183218730	11	1266611	G	C	C	0.8207	1.05	0.687729	1.60377	MUC5B	nonsynonymous SNV	MUC5B:NM_002458:exon31:c.G8501C:p.R2834T	0.011	0	0.007	-1.1	.
6:46801092:A:G	rs12197930	6	46801092	A	G	A	0.8209	1.03093	0.790128	1.34657	MEP1A	nonsynonymous SNV	MEP1A:NM_005588:exon11:c.A1426G:p.R476G	0.0388	0.008	0.142	0.122	MATH/TRAF domain|TRAF-like
3:195515122:G:C	rs202171964	3	195515122	G	C	G	0.8211	1.04603	0.706805	1.54806	MUC4	nonsynonymous SNV	MUC4:NM_018406:exon2:c.C3329G:p.T1110S	0.0237	0.94	0.003	-1.27	.
14:94912896:T:G	rs1885137	14	94912896	T	G	T	0.8211	1.0101	0.930233	1.09672	SERPINA11	nonsynonymous SNV	SERPINA11:NM_001080451:exon3:c.A689C:p.E230A	0.4146	0.11	0.035	-6.34	Serpin domain
9:113234507:T:C	rs10817025	9	113234507	T	C	C	0.8213	1.01	0.922969	1.10535	SVEP1	nonsynonymous SNV	SVEP1:NM_153366:exon15:c.A2696G:p.K899R	0.2924	0	0.051	4.15	.
6:32064098:C:T	rs204896	6	32064098	C	T	T	0.8215	1.016	0.884122	1.16784	TNXB	nonsynonymous SNV	TNXB:NM_019105:exon3:c.G1532A:p.R511H	0.0908	0.585	22.8	2.34	EGF-like domain;EGF-like domain|EGF-like domain, extracellular
14:94936107:G:A	rs4905204	14	94936107	G	A	A	0.8215	1.022	0.845252	1.2363	SERPINA9	nonsynonymous SNV	SERPINA9:NM_001042518:exon2:c.C125T:p.A42V,SERPINA9:NM_175739:exon2:c.C125T:p.A42V	0.0615	0	0.003	0.963	Serpin domain
1:86591141:A:G	rs17128866	1	86591141	A	G	G	0.8219	1.017	0.878095	1.17821	COL24A1	nonsynonymous SNV	COL24A1:NM_152890:exon3:c.T878C:p.I293T	0.0862	0.103	0.004	-0.689	.
6:75848181:A:G	rs240736	6	75848181	A	G	G	0.8225	1.01	0.922969	1.10535	COL12A1	nonsynonymous SNV	COL12A1:NM_080645:exon14:c.T1721C:p.I574T,COL12A1:NM_004370:exon29:c.T5213C:p.I1738T	0.2778	0	0.019	-11.6	Fibronectin type III;von Willebrand factor, type A
1:175348723:C:T	rs859427	1	175348723	C	T	C	0.8227	1.0101	0.926594	1.10102	TNR	nonsynonymous SNV	TNR:NM_001328635:exon9:c.G929A:p.R310K,TNR:NM_003285:exon9:c.G1928A:p.R643K	0.6589	0	15.93	2.83	Fibronectin type III|Immunoglobulin-like fold
9:113196733:A:C	rs7852962	9	113196733	A	C	A	0.8229	1.01317	0.902452	1.13728	SVEP1	nonsynonymous SNV	SVEP1:NM_153366:exon30:c.T4942G:p.L1648V	0.1632	0.002	3.88	-1.32	Sushi/SCR/CCP domain
19:17104239:T:C	rs151335087	19	17104239	T	C	T	0.8233	1.03734	0.751683	1.42966	CPAMD8	nonsynonymous SNV	CPAMD8:NM_015692:exon12:c.A1394G:p.H465R	0.0143	0.682	12.08	1.82	Alpha-2-macroglobulin, N-terminal 2
6:161006077:C:T	rs41272114	6	161006077	C	T	C	0.8236	1.02459	0.825637	1.27074	LPA	.	.	0.0343	.	22.1	2.56	.
7:100680521:G:A	rs73712043	7	100680521	G	A	A	0.8238	1.044	0.717947	1.51795	MUC17	nonsynonymous SNV	MUC17:NM_001040105:exon3:c.G5824A:p.E1942K	0.0157	0.02	0.886	-0.025	.
11:130275749:T:C	rs11222085	11	130275749	T	C	C	0.8241	1.014	0.898059	1.14513	ADAMTS8	nonsynonymous SNV	ADAMTS8:NM_007037:exon9:c.A2374G:p.T792A	0.1763	0.009	9.285	5.34	ADAM-TS Spacer 1
10:88717154:C:T	rs3750823	10	88717154	C	T	C	0.8242	1.01112	0.918476	1.11298	MMRN2	nonsynonymous SNV	MMRN2:NM_024756:exon1:c.G145A:p.G49S	0.4579	0.001	1.208	-5.26	.
1:20645086:T:A	rs35480773	1	20645086	T	A	A	0.8251	1.03	0.796315	1.33077	VWA5B1	nonsynonymous SNV	VWA5B1:NM_001039500:exon6:c.T713A:p.V238E	0.0527	1	31	5.54	.
7:100635210:T:C	rs138453123	7	100635210	T	C	C	0.8255	1.04	0.734974	1.47097	MUC12	nonsynonymous SNV	MUC12:NM_001164462:exon2:c.T1366C:p.S456P	0.0105	.	0.074	.	.
1:236706300:T:A	rs2273865	1	236706300	T	A	A	0.8264	1.025	0.82402	1.27323	LGALS8	stopgain	LGALS8:NM_006499:exon9:c.T635A:p.L212X,LGALS8:NM_201545:exon9:c.T635A:p.L212X	0.0298	.	36	2.59	Concanavalin A-like lectin/glucanase domain|Galectin, carbohydrate recognition domain
3:186389559:T:C	rs10770	3	186389559	T	C	T	0.827	1.0142	0.8963	1.14738	HRG	nonsynonymous SNV	HRG:NM_000412:exon4:c.T539C:p.I180T	0.1136	0.183	13.1	2.81	Cystatin domain
2:190925077:T:C	rs1805086	2	190925077	T	C	C	0.8272	1.036	0.755361	1.41986	MSTN	nonsynonymous SNV	MSTN:NM_005259:exon2:c.A458G:p.K153R	0.0143	0.001	9.742	5.76	Transforming growth factor-beta, N-terminal
1:236706278:G:T	rs2273863	1	236706278	G	T	T	0.8276	1.025	0.82402	1.27323	LGALS8	nonsynonymous SNV	LGALS8:NM_006499:exon9:c.G613T:p.D205Y,LGALS8:NM_201545:exon9:c.G613T:p.D205Y	0.0301	0.004	23.4	4.36	Concanavalin A-like lectin/glucanase domain|Galectin, carbohydrate recognition domain;Galectin, carbohydrate recognition domain
1:44401384:A:G	rs2242637	1	44401384	A	G	A	0.8277	1.01833	0.863605	1.20038	ARTN	nonsynonymous SNV	ARTN:NM_001136215:exon2:c.A56G:p.Q19R,ARTN:NM_057090:exon3:c.A56G:p.Q19R,ARTN:NM_057091:exon3:c.A56G:p.Q19R	0.9252	0	0.176	1.91	.
17:32647357:A:T	rs34202026	17	32647357	A	T	A	0.8283	1.05263	0.65939	1.68277	CCL8	nonsynonymous SNV	CCL8:NM_005623:exon2:c.A146T:p.E49V	0.0324	0.003	9.026	1.73	CC chemokine, conserved site|Chemokine interleukin-8-like domain
7:100634356:G:A	rs61746936	7	100634356	G	A	G	0.83	1.02881	0.790097	1.34125	MUC12	nonsynonymous SNV	MUC12:NM_001164462:exon2:c.G512A:p.R171Q	0.0618	.	18.22	0.713	.
18:29795101:T:C	rs233223	18	29795101	T	C	C	0.8324	1.01	0.922969	1.10535	MEP1B	nonsynonymous SNV	MEP1B:NM_001308171:exon12:c.T1636C:p.S546P,MEP1B:NM_005925:exon12:c.T1636C:p.S546P	0.7255	0	11.38	4.14	MATH/TRAF domain|TRAF-like
6:31733466:T:C	rs3101017	6	31733466	T	C	C	0.8326	1.027	0.802551	1.31516	VWA7	nonsynonymous SNV	VWA7:NM_025258:exon17:c.A2581G:p.T861A	0.1116	0.004	0.157	-0.686	.
3:195507053:A:C	rs201862576	3	195507053	A	C	C	0.8328	1.017	0.872075	1.18398	MUC4	nonsynonymous SNV	MUC4:NM_018406:exon2:c.T11398G:p.S3800A	0.0266	0.012	0.004	.	.
4:71468345:CAGG:C	rs368655454	4	71468345	CAGG	C	C	0.8341	1.019	0.857718	1.21104	AMBN	nonframeshift deletion	AMBN:NM_016519:exon7:c.537_539del:p.179_180del	0.0665	.	.	.	.
21:28216595:C:G	rs428785	21	28216595	C	G	G	0.8345	1.016	0.877218	1.17704	ADAMTS1	nonsynonymous SNV	ADAMTS1:NM_006988:exon1:c.G679C:p.A227P	0.7794	0	9.706	-0.151	.
8:124696867:C:T	rs2294015	8	124696867	C	T	C	0.8347	1.00908	0.927484	1.09777	ANXA13	nonsynonymous SNV	ANXA13:NM_004306:exon10:c.G814A:p.V272I,ANXA13:NM_001003954:exon11:c.G937A:p.V313I	0.6008	0	8.814	0.118	Annexin repeat, conserved site
2:33567971:C:T	rs61751742	2	33567971	C	T	C	0.8349	1.04384	0.695781	1.56631	LTBP1	nonsynonymous SNV	LTBP1:NM_000627:exon21:c.C2819T:p.S940F,LTBP1:NM_001166265:exon21:c.C2660T:p.S887F,LTBP1:NM_206943:exon25:c.C3797T:p.S1266F	0.0132	0.994	34	5.91	EGF-like calcium-binding domain|EGF-like calcium-binding, conserved site|EGF-like domain;EGF-like calcium-binding domain|EGF-like calcium-binding, conserved site|EGF-like domain|EGF-like, conserved site|Growth factor receptor cysteine-rich domain;EGF-like calcium-binding domain|EGF-like calcium-binding, conserved site|EGF-like domain|Growth factor receptor cysteine-rich domain
3:130360527:C:T	rs61629992	3	130360527	C	T	C	0.8349	1.02041	0.841104	1.23991	COL6A6	nonsynonymous SNV	COL6A6:NM_001102608:exon28:c.C5123T:p.S1708F	0.0763	0.744	24	4.29	.
3:186445052:T:G	rs2304456	3	186445052	T	G	G	0.8357	1.014	0.892793	1.15189	KNG1	nonsynonymous SNV	KNG1:NM_000893:exon5:c.T591G:p.I197M,KNG1:NM_001102416:exon5:c.T591G:p.I197M	0.1166	0.742	0.861	-9.97	Cystatin domain|Kininogen-type cystatin domain|Proteinase inhibitor I25, cystatin, conserved site
5:131995964:A:G	rs20541	5	131995964	A	G	A	0.8358	1.01112	0.911303	1.12174	IL13	nonsynonymous SNV	IL13:NM_002188:exon4:c.A431G:p.Q144R	0.7615	.	0.001	-7.23	Four-helical cytokine, core|Four-helical cytokine-like, core
8:99044528:C:T	rs2255317	8	99044528	C	T	T	0.836	1.014	0.892793	1.15189	MATN2	nonsynonymous SNV	MATN2:NM_001317748:exon15:c.C2441T:p.T814M,MATN2:NM_002380:exon16:c.C2564T:p.T855M,MATN2:NM_030583:exon16:c.C2564T:p.T855M	0.1023	0.027	12.71	-0.47	EGF-like domain;von Willebrand factor, type A
5:126791282:G:A	rs17164935	5	126791282	G	A	A	0.8368	1.012	0.906867	1.12948	MEGF10	nonsynonymous SNV	MEGF10:NM_001256545:exon24:c.G3215A:p.R1072K,MEGF10:NM_032446:exon25:c.G3215A:p.R1072K	0.1776	0	10.57	3.01	.
14:55605036:A:C	rs4652	14	55605036	A	C	A	0.8378	1.00908	0.927484	1.09777	LGALS3	nonsynonymous SNV	LGALS3:NM_001177388:exon3:c.A292C:p.T98P,LGALS3:NM_002306:exon3:c.A292C:p.T98P	0.4453	0	1.197	3.29	.
11:20959394:C:T	rs8176786	11	20959394	C	T	C	0.8392	1.01937	0.844374	1.23018	NELL1	nonsynonymous SNV	NELL1:NM_001288714:exon9:c.C889T:p.R297W,NELL1:NM_006157:exon10:c.C1060T:p.R354W,NELL1:NM_201551:exon10:c.C1060T:p.R354W,NELL1:NM_001288713:exon11:c.C1144T:p.R382W	0.0496	0.993	24.1	4.26	VWFC domain
2:242004296:G:A	rs150081750	2	242004296	G	A	A	0.8411	1.067	0.565503	2.01383	SNED1	nonsynonymous SNV	SNED1:NM_001080437:exon20:c.G2636A:p.R879H	0.0119	0.278	22.9	3.22	EGF-like calcium-binding domain|EGF-like domain|Growth factor receptor cysteine-rich domain;EGF-like domain
11:1021268:T:C	rs113451874	11	1021268	T	C	C	0.8412	1.019	0.849353	1.22297	MUC6	nonsynonymous SNV	MUC6:NM_005961:exon27:c.A3536G:p.N1179S	0.0551	0.98	15.37	2.9	.
1:155033918:C:T	rs41264285	1	155033918	C	T	C	0.842	1.0101	0.913968	1.11623	ADAM15	nonsynonymous SNV	ADAM15:NM_207194:exon20:c.C2305T:p.P769S,ADAM15:NM_207196:exon20:c.C2302T:p.P768S,ADAM15:NM_207197:exon20:c.C2305T:p.P769S	0.2104	0.86	23.8	3.41	.
1:22160043:C:T	rs2229493	1	22160043	C	T	C	0.8426	1.01523	0.876341	1.17586	HSPG2	nonsynonymous SNV	HSPG2:NM_001291860:exon79:c.G10898A:p.R3633Q,HSPG2:NM_005529:exon79:c.G10895A:p.R3632Q	0.0747	0.003	4.684	-1.15	Immunoglobulin I-set|Immunoglobulin subtype 2|Immunoglobulin-like domain|Immunoglobulin-like fold
20:2375262:A:G	rs2076405	20	2375262	A	G	G	0.8427	1.018	0.855183	1.2122	TGM6	nonsynonymous SNV	TGM6:NM_001254734:exon2:c.A172G:p.M58V,TGM6:NM_198994:exon2:c.A172G:p.M58V	0.9324	0	0.009	3.66	Immunoglobulin E-set|Immunoglobulin-like fold|Transglutaminase, N-terminal
2:96798305:C:T	rs41320144	2	96798305	C	T	T	0.8452	1.021	0.831271	1.25458	ASTL	nonsynonymous SNV	ASTL:NM_001002036:exon6:c.G611A:p.R204H	0.029	0.019	18.8	0.941	Metallopeptidase, catalytic domain|Peptidase M12A, astacin|Peptidase, metallopeptidase
6:32046944:C:T	rs9267799	6	32046944	C	T	C	0.8453	1.03627	0.722788	1.48682	TNXB	nonsynonymous SNV	TNXB:NM_019105:exon11:c.G4241A:p.R1414Q	0.013	0.003	9.859	4.35	Fibronectin type III|Immunoglobulin-like fold
18:61585260:T:C	rs724558	18	61585260	T	C	C	0.8458	1.01	0.910392	1.12062	SERPINB10	nonsynonymous SNV	SERPINB10:NM_005024:exon4:c.T296C:p.I99T	0.1829	1	24.8	5.82	Serpin domain
11:17580175:A:T	rs7130190	11	17580175	A	T	A	0.8476	1.01523	0.869497	1.18512	OTOG	nonsynonymous SNV	OTOG:NM_001277269:exon9:c.A1123T:p.T375S,OTOG:NM_001292063:exon10:c.A1087T:p.T363S	0.1418	.	15.78	4.89	Uncharacterised domain, cysteine-rich
12:6140659:C:T	rs33978901	12	6140659	C	T	T	0.848	1.028	0.775506	1.36375	VWF	nonsynonymous SNV	VWF:NM_000552:exon21:c.G2771A:p.R924Q	0.0188	0.023	22.9	3.75	von Willebrand factor, type D domain
15:51693813:G:A	rs35223886	15	51693813	G	A	G	0.848	1.02669	0.78773	1.33723	GLDN	nonsynonymous SNV	GLDN:NM_001330297:exon9:c.G679A:p.D227N,GLDN:NM_181789:exon9:c.G1051A:p.D351N	0.0286	0.015	20.7	4.81	Olfactomedin-like domain
11:1271894:C:G	rs200422772	11	1271894	C	G	C	0.8486	1.02775	0.773987	1.36643	MUC5B	nonsynonymous SNV	MUC5B:NM_002458:exon31:c.C13784G:p.T4595S	0.0239	0.01	0.067	-1.19	.
2:152226570:A:G	rs1046668	2	152226570	A	G	A	0.8491	1.01215	0.898023	1.14061	TNFAIP6	nonsynonymous SNV	TNFAIP6:NM_007115:exon4:c.A431G:p.Q144R	0.1531	0	0.638	3.46	CUB domain
5:38350643:G:A	rs2561111	5	38350643	G	A	G	0.8494	1.01317	0.883203	1.16207	EGFLAM	nonsynonymous SNV	EGFLAM:NM_001205301:exon4:c.G332A:p.R111H,EGFLAM:NM_152403:exon4:c.G332A:p.R111H	0.0933	0.985	25.3	0.979	Fibronectin type III|Immunoglobulin-like fold
9:101831995:G:A	rs10519	9	101831995	G	A	A	0.8494	1.016	0.86357	1.19564	COL15A1	nonsynonymous SNV	COL15A1:NM_001855:exon42:c.G3994A:p.V1332I	0.0593	0.002	3.415	2.94	C-type lectin fold|C-type lectin-like|Collagenase NC10/endostatin
12:7894056:G:A	rs73056605	12	7894056	G	A	A	0.8498	1.009	0.922046	1.10424	CLEC4C	nonsynonymous SNV	CLEC4C:NM_203503:exon3:c.C103T:p.P35S,CLEC4C:NM_130441:exon4:c.C196T:p.P66S	0.2553	0	0.001	-1.29	.
4:88416188:G:T	rs13051	4	88416188	G	T	T	0.8505	1.008	0.926557	1.09667	SPARCL1	nonsynonymous SNV	SPARCL1:NM_004684:exon3:c.C146A:p.A49D,SPARCL1:NM_001128310:exon4:c.C146A:p.A49D	0.3658	0	2.917	3.02	.
17:44950122:T:C	rs4968281	17	44950122	T	C	T	0.8508	1.01215	0.892758	1.14733	WNT9B	nonsynonymous SNV	WNT9B:NM_001320458:exon2:c.T317C:p.M106T,WNT9B:NM_003396:exon2:c.T317C:p.M106T	0.7472	0	0.003	-0.034	.
4:88415636:G:C	rs1049544	4	88415636	G	C	C	0.8509	1.008	0.926557	1.09667	SPARCL1	nonsynonymous SNV	SPARCL1:NM_004684:exon4:c.C316G:p.H106D,SPARCL1:NM_001128310:exon5:c.C316G:p.H106D	0.3661	0	0.007	4.25	.
6:32050067:T:C	rs185819	6	32050067	T	C	T	0.8519	1.00908	0.914846	1.11293	TNXB	nonsynonymous SNV	TNXB:NM_019105:exon9:c.A3482G:p.H1161R	0.5193	0	0.004	3.96	Fibronectin type III|Immunoglobulin-like fold
4:119219909:C:A	rs28661939	4	119219909	C	A	C	0.8521	1.01112	0.900649	1.13501	PRSS12	nonsynonymous SNV	PRSS12:NM_003619:exon9:c.G1816T:p.A606S	0.1584	0.03	15.33	1.72	.
2:227915847:C:T	rs13027659	2	227915847	C	T	C	0.8526	1.02775	0.766439	1.37988	COL4A4	nonsynonymous SNV	COL4A4:NM_000092:exon33:c.G2996A:p.G999E	0.0225	1	23.9	5.52	.
16:57392733:A:C	rs4359426	16	57392733	A	C	A	0.8527	1.01833	0.841878	1.23136	CCL22	nonsynonymous SNV	CCL22:NM_002990:exon1:c.A5C:p.D2A	0.9505	0	2.046	3.45	.
9:117803271:C:T	rs2274750	9	117803271	C	T	T	0.853	1.023	0.800915	1.30735	TNC	nonsynonymous SNV	TNC:NM_002160:exon19:c.G5341A:p.A1781T	0.0319	0.99	33	4.08	Fibronectin type III|Immunoglobulin-like fold
19:10077419:C:G	rs3745584	19	10077419	C	G	G	0.8533	1.009	0.922046	1.10424	COL5A3	nonsynonymous SNV	COL5A3:NM_015719:exon63:c.G4462C:p.A1488P	0.3605	0	5.332	2.01	.
7:103292112:T:G	rs115734214	7	103292112	T	G	G	0.8534	1.022	0.81276	1.28572	RELN	nonsynonymous SNV	RELN:NM_005045:exon15:c.A1888C:p.S630R,RELN:NM_173054:exon15:c.A1888C:p.S630R	0.0298	0.999	25	5.62	Sialidases
19:17108127:C:T	rs61744199	19	17108127	C	T	T	0.8543	1.034	0.726294	1.47079	CPAMD8	nonsynonymous SNV	CPAMD8:NM_015692:exon11:c.G1030A:p.D344N	0.0102	0.878	21.7	0.629	.
6:32049423:C:T	rs12211410	6	32049423	C	T	C	0.8546	1.01626	0.855149	1.20741	TNXB	nonsynonymous SNV	TNXB:NM_019105:exon10:c.G3764A:p.R1255H	0.0833	0.005	2.123	-2.69	.
6:112522852:G:A	rs11757455	6	112522852	G	A	G	0.8547	1.01523	0.860192	1.20033	LAMA4	nonsynonymous SNV	LAMA4:NM_001105206:exon5:c.C460T:p.R154W,LAMA4:NM_001105207:exon5:c.C460T:p.R154W,LAMA4:NM_002290:exon5:c.C460T:p.R154W	0.0627	1	34	4.2	EGF-like domain|Laminin EGF domain
9:113221247:T:C	rs7038903	9	113221247	T	C	T	0.8548	1.01112	0.900649	1.13501	SVEP1	nonsynonymous SNV	SVEP1:NM_153366:exon19:c.A3469G:p.I1157V	0.1632	0.958	23.1	5.6	Tyrosine-protein kinase ephrin type A/B receptor-like
11:27720937:C:T	rs66866077	11	27720937	C	T	C	0.8572	1.01626	0.851803	1.21216	BDNF	nonsynonymous SNV	BDNF:NM_170734:exon1:c.G16A:p.E6K	0.0465	0.938	12.28	0.204	.
4:79188584:C:T	rs61999335	4	79188584	C	T	T	0.8575	1.034	0.717803	1.48819	FRAS1	nonsynonymous SNV	FRAS1:NM_001166133:exon9:c.C979T:p.R327W,FRAS1:NM_025074:exon9:c.C979T:p.R327W	0.0209	0.002	21.2	4.29	VWFC domain
10:81931367:A:G	rs11201964	10	81931367	A	G	A	0.8582	1.01112	0.898885	1.13724	ANXA11	.	.	0.1292	.	.	.	.
16:69988472:C:T	rs75776403	16	69988472	C	T	C	0.8586	1.01112	0.895368	1.1417	CLEC18A	nonsynonymous SNV	CLEC18A:NM_001136214:exon4:c.C452T:p.T151M,CLEC18A:NM_001271197:exon4:c.C452T:p.T151M,CLEC18A:NM_182619:exon4:c.C452T:p.T151M	0.2372	0.998	25.5	1.97	CAP domain
1:22168801:T:C	rs2229491	1	22168801	T	C	T	0.8589	1.01317	0.87459	1.17351	HSPG2	nonsynonymous SNV	HSPG2:NM_001291860:exon68:c.A8986G:p.S2996G,HSPG2:NM_005529:exon68:c.A8983G:p.S2995G	0.0745	0	0.004	1	Immunoglobulin subtype 2|Immunoglobulin-like domain
1:206319119:A:G	rs57621203	1	206319119	A	G	G	0.8589	1.053	0.597835	1.85603	CTSE	nonsynonymous SNV	CTSE:NM_001317331:exon2:c.A19G:p.I7V,CTSE:NM_001910:exon3:c.A244G:p.I82V,CTSE:NM_148964:exon3:c.A244G:p.I82V	0.0176	.	.	2.37	Aspartic peptidase domain|Peptidase family A1 domain
1:22167605:C:T	rs2228349	1	22167605	C	T	C	0.859	1.01317	0.87459	1.17351	HSPG2	nonsynonymous SNV	HSPG2:NM_001291860:exon71:c.G9505A:p.A3169T,HSPG2:NM_005529:exon71:c.G9502A:p.A3168T	0.0744	0.006	13.43	-0.426	Immunoglobulin I-set|Immunoglobulin subtype 2|Immunoglobulin-like domain|Immunoglobulin-like fold
6:160953642:A:G	rs41267809	6	160953642	A	G	A	0.8596	1.02459	0.779268	1.34905	LPA	nonsynonymous SNV	LPA:NM_005577:exon39:c.T5882C:p.L1961P	0.0246	1	2.003	1.42	Kringle-like fold
19:9066390:G:A	rs11667414	19	9066390	G	A	G	0.8613	1.02249	0.793866	1.31632	MUC16	nonsynonymous SNV	MUC16:NM_024690:exon3:c.C21056T:p.S7019L	0.0195	0.614	9.344	-0.994	.
6:32011235:C:T	rs28361048	6	32011235	C	T	T	0.8614	1.009	0.913054	1.11512	TNXB	nonsynonymous SNV	TNXB:NM_032470:exon5:c.G916A:p.V306I,TNXB:NM_019105:exon36:c.G11623A:p.V3875I	0.493	0.083	0.09	0.727	EGF-like domain|EGF-like, conserved site;Fibronectin type III|Immunoglobulin-like fold
9:113244732:G:T	rs41296069	9	113244732	G	T	G	0.8617	1.0142	0.866927	1.18625	SVEP1	nonsynonymous SNV	SVEP1:NM_153366:exon11:c.C2079A:p.D693E	0.0718	0.008	9.692	-1.17	HYR domain
6:159654030:G:A	rs73023729	6	159654030	G	A	A	0.8618	1.031	0.729118	1.45925	FNDC1	nonsynonymous SNV	FNDC1:NM_032532:exon11:c.G2486A:p.G829E	0.0188	0.728	20.6	2.74	.
11:57146225:A:G	rs34108746	11	57146225	A	G	A	0.8637	1.01523	0.850135	1.21453	PRG3	nonsynonymous SNV	PRG3:NM_006093:exon4:c.T436C:p.Y146H	0.0757	0.213	0.003	-9.75	C-type lectin|C-type lectin fold|C-type lectin-like
19:48525507:G:A	rs2303690	19	48525507	G	A	A	0.8644	1.007	0.927447	1.09343	ELSPBP1	nonsynonymous SNV	ELSPBP1:NM_022142:exon6:c.G595A:p.E199K	0.5747	0.011	4.723	1.54	Fibronectin, type II, collagen-binding|Kringle-like fold
12:9020489:A:G	rs7308811	12	9020489	A	G	G	0.865	1.01	0.90415	1.1261	A2ML1	nonsynonymous SNV	A2ML1:NM_001282424:exon19:c.A2296G:p.M766V,A2ML1:NM_144670:exon30:c.A3769G:p.M1257V	0.8165	0	0.002	-0.406	Alpha-2-macroglobulin
1:152127455:T:C	rs75957773	1	152127455	T	C	T	0.8654	1.01523	0.850952	1.21094	RPTN	nonsynonymous SNV	RPTN:NM_001122965:exon3:c.A2120G:p.E707G	0.116	0.356	8.931	2.82	.
22:37578652:G:A	rs17812699	22	37578652	G	A	G	0.8662	1.0142	0.858473	1.19794	C1QTNF6	nonsynonymous SNV	C1QTNF6:NM_031910:exon3:c.C413T:p.P138L,C1QTNF6:NM_182486:exon3:c.C413T:p.P138L	0.0741	0.331	23.7	5.14	C1q domain|Tumour necrosis factor-like domain
6:32064726:T:C	rs1150752	6	32064726	T	C	C	0.8667	1.021	0.79775	1.30729	TNXB	nonsynonymous SNV	TNXB:NM_019105:exon3:c.A904G:p.T302A	0.1097	0.018	0.003	-2.19	EGF-like domain|EGF-like, conserved site
3:122631896:A:T	rs2276782	3	122631896	A	T	T	0.8668	1.01	0.901514	1.13165	SEMA5B	nonsynonymous SNV	SEMA5B:NM_001256348:exon17:c.T2345A:p.V782D,SEMA5B:NM_001031702:exon18:c.T2519A:p.V840D,SEMA5B:NM_001256346:exon18:c.T2519A:p.V840D,SEMA5B:NM_001256347:exon18:c.T2681A:p.V894D	0.814	0	16.08	5.01	.
3:151171439:A:C	rs7619322	3	151171439	A	C	A	0.8676	1.00806	0.917521	1.10747	IGSF10	nonsynonymous SNV	IGSF10:NM_178822:exon3:c.T448G:p.Y150D	0.7209	0.938	23.1	-2.47	Leucine-rich repeat domain, L domain-like
1:22200998:C:T	rs2229481	1	22200998	C	T	T	0.8685	1.02	0.809547	1.28567	HSPG2	nonsynonymous SNV	HSPG2:NM_001291860:exon28:c.G3560A:p.R1187Q,HSPG2:NM_005529:exon28:c.G3557A:p.R1186Q	0.029	0.002	19.28	0.185	Laminin EGF domain
17:26694861:G:A	rs704	17	26694861	G	A	G	0.8709	1.00705	0.923818	1.09773	VTN	nonsynonymous SNV	VTN:NM_000638:exon7:c.C1199T:p.T400M	0.471	0.943	0.029	-8.94	Hemopexin-like domain
4:154709854:G:A	rs4643790	4	154709854	G	A	A	0.8715	1.009	0.909482	1.1195	SFRP2	nonsynonymous SNV	SFRP2:NM_003013:exon1:c.C134T:p.A45V	0.1619	0.013	23.2	4.63	Frizzled domain
1:86557967:G:A	rs11161732	1	86557967	G	A	A	0.8721	1.008	0.913931	1.11182	COL24A1	nonsynonymous SNV	COL24A1:NM_152890:exon6:c.C1636T:p.P546S	0.3652	0	17.46	3.91	.
6:30954434:A:G	rs9262337	6	30954434	A	G	A	0.8722	1.0142	0.851769	1.20736	MUC21	nonsynonymous SNV	MUC21:NM_001010909:exon2:c.A482G:p.E161G	0.0799	0	0.002	-7.51	Tandem-repeating region of mucin, epiglycanin-like
10:7618686:T:G	rs2275069	10	7618686	T	G	G	0.8735	1.007	0.927447	1.09343	ITIH5	nonsynonymous SNV	ITIH5:NM_032817:exon6:c.A1066C:p.T356P,ITIH5:NM_001001851:exon10:c.A1708C:p.T570P,ITIH5:NM_030569:exon10:c.A1708C:p.T570P	0.532	0	0.002	1.31	.
7:76071228:A:G	rs143649134	7	76071228	A	G	G	0.8742	1.013	0.860983	1.19206	ZP3	nonsynonymous SNV	ZP3:NM_001110354:exon8:c.A1130G:p.E377G,ZP3:NM_007155:exon9:c.A977G:p.E326G	0.0996	0.254	9.019	2.14	.
6:32134510:G:A	rs3096697	6	32134510	G	A	G	0.8753	1.01112	0.883168	1.15747	EGFL8	nonsynonymous SNV	EGFL8:NM_030652:exon4:c.G257A:p.R86K	0.2096	0.002	10.99	3.38	EMI domain
3:100532510:T:A	rs73135513	3	100532510	T	A	A	0.8756	1.008	0.910356	1.11619	ABI3BP	nonsynonymous SNV	ABI3BP:NM_001349330:exon39:c.A2957T:p.Q986L,ABI3BP:NM_001349329:exon42:c.A3167T:p.Q1056L	0.2094	0.139	14.25	3.92	.
5:5146335:C:G	rs2086310	5	5146335	C	G	C	0.8757	1.00806	0.910356	1.11619	ADAMTS16	nonsynonymous SNV	ADAMTS16:NM_139056:exon3:c.C268G:p.P90A	0.8022	0	0.001	-0.853	Peptidase M12B, propeptide
1:153391729:G:A	rs3006414	1	153391729	G	A	A	0.8763	1.012	0.866893	1.18157	S100A7A	nonsynonymous SNV	S100A7A:NM_176823:exon3:c.G250A:p.A84T	0.0849	0	0.002	-2.9	EF-hand domain|EF-hand domain pair
21:46875874:G:A	rs61759533	21	46875874	G	A	A	0.8766	1.021	0.783801	1.33056	COL18A1	nonsynonymous SNV	COL18A1:NM_030582:exon1:c.G430A:p.V144I,COL18A1:NM_130444:exon1:c.G430A:p.V144I	0.0207	0.083	2.346	-0.718	Domain of unknown function DUF959, collagen XVIII, N-terminal
8:99030320:G:A	rs35120814	8	99030320	G	A	A	0.8767	1.015	0.837713	1.23008	MATN2	nonsynonymous SNV	MATN2:NM_001317748:exon11:c.G1672A:p.A558T,MATN2:NM_002380:exon12:c.G1795A:p.A599T,MATN2:NM_030583:exon12:c.G1795A:p.A599T	0.0441	0.006	7.405	2.02	EGF-like calcium-binding domain|EGF-like domain|EGF-like, conserved site|Growth factor receptor cysteine-rich domain;EGF-like domain|EGF-like, conserved site
12:6128170:C:G	rs1800383	12	6128170	C	G	C	0.8767	1.01523	0.841003	1.22527	VWF	nonsynonymous SNV	VWF:NM_000552:exon28:c.G4414C:p.D1472H	0.0805	0	0.003	0.812	von Willebrand factor, type A
1:208390162:T:C	rs4844658	1	208390162	T	C	T	0.8777	1.00806	0.905018	1.12277	PLXNA2	nonsynonymous SNV	PLXNA2:NM_025179:exon2:c.A1106G:p.E369G	0.2037	0.979	23.2	5.84	Sema domain|WD40/YVTN repeat-like-containing domain
6:54173413:A:G	rs2297980	6	54173413	A	G	G	0.8781	1.01	0.88575	1.15179	TINAG	nonsynonymous SNV	TINAG:NM_014464:exon1:c.A65G:p.Q22R	0.1085	0	0.002	-4.04	.
3:195511142:T:C	rs430037	3	195511142	T	C	T	0.8783	1.00806	0.913931	1.11182	MUC4	nonsynonymous SNV	MUC4:NM_018406:exon2:c.A7309G:p.N2437D	0.3253	0.012	0.285	.	.
6:32011316:G:T	rs200457864	6	32011316	G	T	T	0.8785	1.014	0.846775	1.21448	TNXB	nonsynonymous SNV	TNXB:NM_032470:exon5:c.C835A:p.Q279K,TNXB:NM_019105:exon36:c.C11542A:p.Q3848K	0.0484	0.013	21.9	2.5	EGF-like domain;Fibronectin type III|Immunoglobulin-like fold
17:6980105:G:A	rs35318160	17	6980105	G	A	A	0.8786	1.021	0.783801	1.33056	CLEC10A	nonsynonymous SNV	CLEC10A:NM_001330070:exon5:c.C299T:p.T100M,CLEC10A:NM_006344:exon5:c.C299T:p.T100M,CLEC10A:NM_182906:exon5:c.C299T:p.T100M	0.0231	0.274	0.002	-9.71	Hepatic lectin, N-terminal
13:39266484:G:A	rs1868463	13	39266484	G	A	G	0.8798	1.0142	0.839356	1.22767	FREM2	nonsynonymous SNV	FREM2:NM_207361:exon1:c.G5003A:p.R1668H	0.0448	0.998	32	4.55	.
6:32026107:C:T	rs1009382	6	32026107	C	T	C	0.8806	1.00806	0.906794	1.12057	TNXB	nonsynonymous SNV	TNXB:NM_019105:exon22:c.G7553A:p.G2518E	0.7155	0	0.052	3.3	Fibronectin type III
20:43976991:A:G	rs2228384	20	43976991	A	G	A	0.883	1.00604	0.922895	1.09663	SDC4	nonsynonymous SNV	SDC4:NM_002999:exon1:c.T34C:p.F12L	0.3641	0	13.77	1.9	.
1:226076669:C:T	rs41310561	1	226076669	C	T	C	0.8833	1.01626	0.817455	1.26309	LEFTY1	nonsynonymous SNV	LEFTY1:NM_020997:exon1:c.G98A:p.R33Q	0.0378	0.001	0.033	-5.9	.
7:45954465:G:A	rs145188037	7	45954465	G	A	A	0.8838	1.027	0.722643	1.45767	IGFBP3	nonsynonymous SNV	IGFBP3:NM_000598:exon4:c.C830T:p.T277I,IGFBP3:NM_001013398:exon4:c.C848T:p.T283I	0.0172	0.059	8.42	0.958	Thyroglobulin type-1
13:39430314:C:T	rs9548509	13	39430314	C	T	C	0.8844	1.00705	0.920204	1.10204	FREM2	nonsynonymous SNV	FREM2:NM_207361:exon12:c.C6977T:p.T2326I	0.7096	0	14.53	5.66	Na-Ca exchanger/integrin-beta4
7:100681359:C:G	rs11979706	7	100681359	C	G	C	0.885	1.00604	0.922895	1.09663	MUC17	nonsynonymous SNV	MUC17:NM_001040105:exon3:c.C6662G:p.P2221R	0.5878	0.985	1.925	1.11	.
10:124356566:T:G	rs181123368	10	124356566	T	G	G	0.8853	1.015	0.832801	1.23734	DMBT1	nonsynonymous SNV	DMBT1:NM_004406:exon14:c.T1416G:p.S472R,DMBT1:NM_017579:exon23:c.T2883G:p.S961R,DMBT1:NM_001320644:exon24:c.T2913G:p.S971R,DMBT1:NM_007329:exon24:c.T2913G:p.S971R	0.055	0.005	0.197	-0.355	SRCR domain|SRCR-like domain
6:30993590:A:G	rs12179536	6	30993590	A	G	G	0.8864	1.009	0.895333	1.13719	MUC22	nonsynonymous SNV	MUC22:NM_001198815:exon3:c.A382G:p.I128V,MUC22:NM_001318484:exon3:c.A391G:p.I131V,MUC22:NM_001322469:exon3:c.A391G:p.I131V	0.1815	.	0.034	-3.01	.
4:71469604:C:T	rs7439186	4	71469604	C	T	T	0.8869	1.012	0.853406	1.20024	AMBN	nonsynonymous SNV	AMBN:NM_016519:exon12:c.C764T:p.A255V	0.0671	0.885	25.2	-0.765	.
20:23805953:C:T	rs45539436	20	23805953	C	T	T	0.8878	1.013	0.842619	1.21804	CST2	nonsynonymous SNV	CST2:NM_001322:exon2:c.G236A:p.G79D	0.0622	0	8.215	1.38	Cystatin domain|Proteinase inhibitor I25, cystatin, conserved site
3:130284284:G:A	rs9830253	3	130284284	G	A	A	0.888	1.008	0.901478	1.12718	COL6A6	nonsynonymous SNV	COL6A6:NM_001102608:exon3:c.G1108A:p.A370T	0.859	0.998	25.2	4.08	von Willebrand factor, type A
7:100681751:A:G	rs73712044	7	100681751	A	G	G	0.8881	1.028	0.701735	1.50712	MUC17	nonsynonymous SNV	MUC17:NM_001040105:exon3:c.A7054G:p.S2352G	0.0157	0.011	0.028	-1.36	.
15:75117912:G:T	rs79217743	15	75117912	G	T	G	0.8886	1.00806	0.896193	1.13383	LMAN1L	nonsynonymous SNV	LMAN1L:NM_021819:exon14:c.G1547T:p.R516M	0.1392	1	24.9	3.93	.
9:21228002:A:AT	rs200400518	9	21228002	A	AT	AT	0.8898	1.017	0.800819	1.29191	IFNA17	frameshift insertion	IFNA17:NM_021268:exon1:c.170dupA:p.H57fs	0.0309	.	.	.	.
19:10114252:C:G	rs61742765	19	10114252	C	G	C	0.8932	1.00705	0.909446	1.11507	COL5A3	nonsynonymous SNV	COL5A3:NM_015719:exon6:c.G838C:p.A280P	0.1841	0	14.19	2.82	.
12:9833524:C:G	rs3764022	12	9833524	C	G	G	0.8938	1.006	0.922895	1.09663	CLEC2D	nonsynonymous SNV	CLEC2D:NM_001004419:exon2:c.C67G:p.L23V,CLEC2D:NM_001197318:exon2:c.C67G:p.L23V,CLEC2D:NM_013269:exon2:c.C67G:p.L23V	0.303	0.017	0.055	0.395	.
18:61264298:G:A	rs1020694	18	61264298	G	A	A	0.8942	1.007	0.91123	1.11289	SERPINB13	nonsynonymous SNV	SERPINB13:NM_001348269:exon6:c.G340A:p.G114S,SERPINB13:NM_001348270:exon6:c.G340A:p.G114S,SERPINB13:NM_001348267:exon7:c.G469A:p.G157S,SERPINB13:NM_001307923:exon8:c.G904A:p.G302S,SERPINB13:NM_012397:exon8:c.G877A:p.G293S,SERPINB13:NM_001348268:exon9:c.G469A:p.G157S	0.7967	0.003	0.27	2.85	Serpin domain
7:100684650:C:G	rs12673753	7	100684650	C	G	G	0.8945	1.026	0.698961	1.50706	MUC17	nonsynonymous SNV	MUC17:NM_001040105:exon3:c.C9953G:p.A3318G	0.0155	0.953	14.2	0.056	.
7:103234202:C:T	rs55689103	7	103234202	C	T	T	0.8954	1.021	0.749252	1.39191	RELN	nonsynonymous SNV	RELN:NM_005045:exon27:c.G3839A:p.G1280E,RELN:NM_173054:exon27:c.G3839A:p.G1280E	0.0151	0.998	26.1	6.07	.
3:195511523:C:G	rs142766505	3	195511523	C	G	G	0.8955	1.008	0.899713	1.12939	MUC4	nonsynonymous SNV	MUC4:NM_018406:exon2:c.G6928C:p.A2310P	0.3548	0.957	2.837	.	.
19:55879672:C:T	rs4252548	19	55879672	C	T	T	0.8964	1.035	0.620295	1.72557	IL11	nonsynonymous SNV	IL11:NM_001267718:exon3:c.G98A:p.R33H,IL11:NM_000641:exon4:c.G335A:p.R112H	0.0281	0.999	25.9	2.94	Four-helical cytokine-like, core
11:1265339:A:G	rs200877179	11	1265339	A	G	G	0.8975	1.029	0.670803	1.57661	MUC5B	nonsynonymous SNV	MUC5B:NM_002458:exon31:c.A7229G:p.N2410S	0.0275	0.61	0.102	2.35	.
1:113051909:G:A	rs36006679	1	113051909	G	A	G	0.8977	1.03199	0.633788	1.68209	WNT2B	nonsynonymous SNV	WNT2B:NM_024494:exon1:c.G25A:p.E9K	0.0183	0.001	24.6	3	.
4:57976487:G:A	rs11573021	4	57976487	G	A	G	0.8997	1.00908	0.881403	1.15516	IGFBP7	nonsynonymous SNV	IGFBP7:NM_001253835:exon1:c.C31T:p.L11F,IGFBP7:NM_001553:exon1:c.C31T:p.L11F	0.2061	0.005	10.17	2.63	.
1:226125385:G:A	rs2295418	1	226125385	G	A	A	0.9001	1.017	0.782204	1.32265	LEFTY2	nonsynonymous SNV	LEFTY2:NM_003240:exon4:c.C857T:p.P286L,LEFTY2:NM_001172425:exon5:c.C755T:p.P252L	0.0338	1	23.5	4.18	Cystine-knot cytokine|Transforming growth factor beta, conserved site|Transforming growth factor-beta, C-terminal;Transforming growth factor-beta, C-terminal
1:152281724:G:T	rs149817134	1	152281724	G	T	G	0.9011	1.02354	0.70788	1.47917	FLG	nonsynonymous SNV	FLG:NM_002016:exon3:c.C5638A:p.H1880N	0.0118	0.925	7.738	2.54	.
1:40773123:G:C	rs2228567	1	40773123	G	C	G	0.9017	1.00806	0.890938	1.14052	COL9A2	nonsynonymous SNV	COL9A2:NM_001852:exon19:c.C1003G:p.L335V	0.1113	0.822	23.2	3	.
6:32065113:C:T	rs61746206	6	32065113	C	T	C	0.9026	1.01833	0.761793	1.36081	TNXB	nonsynonymous SNV	TNXB:NM_019105:exon3:c.G517A:p.A173T	0.0198	0.052	0.001	-8.83	.
4:79176444:G:A	rs147332320	4	79176444	G	A	G	0.9043	1.02041	0.732538	1.42083	FRAS1	nonsynonymous SNV	FRAS1:NM_001166133:exon6:c.G518A:p.R173Q,FRAS1:NM_025074:exon6:c.G518A:p.R173Q	0.0131	0.003	0.105	-8.94	VWC out|VWFC domain;VWFC domain
4:90857479:G:A	rs12646270	4	90857479	G	A	G	0.9043	1.01112	0.842586	1.21322	MMRN1	nonsynonymous SNV	MMRN1:NM_007351:exon6:c.G2648A:p.G883D	0.0433	0.012	0.004	-0.489	.
3:195508091:T:C	rs62282474	3	195508091	T	C	C	0.9048	1.008	0.885715	1.14724	MUC4	nonsynonymous SNV	MUC4:NM_018406:exon2:c.A10360G:p.T3454A	0.2155	0.34	0.001	-1.49	.
11:1275988:T:C	rs56232219	11	1275988	T	C	T	0.9062	1.01729	0.764021	1.35413	MUC5B	nonsynonymous SNV	MUC5B:NM_002458:exon35:c.T15542C:p.L5181P	0.0396	0.002	4.897	-0.018	von Willebrand factor, type D domain
11:1278912:G:C	rs56220864	11	1278912	G	C	G	0.9062	1.01729	0.764021	1.35413	MUC5B	nonsynonymous SNV	MUC5B:NM_002458:exon41:c.G16422C:p.E5474D	0.0395	0	11	2.97	VWFC domain
4:74964830:C:T	rs186397980	4	74964830	C	T	C	0.9078	1.02564	0.666177	1.57807	CXCL2	nonsynonymous SNV	CXCL2:NM_002089:exon1:c.G8A:p.R3H	0.0218	0.001	0.052	-6.95	.
19:9020153:C:T	rs75217292	19	9020153	C	T	T	0.9079	1.01	0.860088	1.18616	MUC16	nonsynonymous SNV	MUC16:NM_024690:exon21:c.G37342A:p.E12448K	0.1045	0.01	16.02	-0.36	SEA domain
19:18980172:G:A	rs4808863	19	18980172	G	A	A	0.9086	1.009	0.871099	1.16883	GDF1	nonsynonymous SNV	GDF1:NM_001492:exon8:c.C353T:p.A118V	0.3796	.	0.153	0.926	.
12:4479549:G:A	rs7955866	12	4479549	G	A	A	0.9095	1.009	0.869393	1.17112	FGF23	nonsynonymous SNV	FGF23:NM_020638:exon3:c.C716T:p.T239M	0.1148	0.001	0.631	-8.86	.
9:91978397:C:T	rs13295305	9	91978397	C	T	C	0.9104	1.00806	0.883981	1.14949	SEMA4D	nonsynonymous SNV	SEMA4D:NM_001142287:exon20:c.G2138A:p.R713K	0.1393	0.004	14.97	0.793	Sema domain|WD40/YVTN repeat-like-containing domain
5:178555097:C:T	rs35445112	5	178555097	C	T	T	0.9114	1.013	0.81341	1.26178	ADAMTS2	nonsynonymous SNV	ADAMTS2:NM_014244:exon17:c.G2480A:p.R827Q	0.0298	0.038	21.9	3.4	ADAM-TS Spacer 1
7:100686777:C:T	rs138142210	7	100686777	C	T	C	0.9118	1.02249	0.683342	1.53228	MUC17	nonsynonymous SNV	MUC17:NM_001040105:exon3:c.C12080T:p.T4027M	0.0292	0.88	14.17	-1.66	.
6:30994248:C:G	rs28360986	6	30994248	C	G	C	0.9124	1.00806	0.866823	1.17224	MUC22	nonsynonymous SNV	MUC22:NM_001198815:exon3:c.C1040G:p.T347S,MUC22:NM_001318484:exon3:c.C1049G:p.T350S,MUC22:NM_001322469:exon3:c.C1049G:p.T350S	0.0872	.	0.227	1.42	.
1:152328095:C:T	rs16842865	1	152328095	C	T	C	0.9127	1.01626	0.75657	1.36747	FLG2	nonsynonymous SNV	FLG2:NM_001014342:exon3:c.G2167A:p.E723K	0.0189	0.913	17.82	3.69	.
3:186461524:C:T	rs76438938	3	186461524	C	T	C	0.9134	1.01317	0.796061	1.28927	KNG1	stopgain	KNG1:NM_001166451:exon10:c.C1126T:p.R376X,KNG1:NM_000893:exon11:c.C1234T:p.R412X	0.0269	.	18.83	4.12	Kininogen-type cystatin domain
1:152329852:C:T	rs6587667	1	152329852	C	T	C	0.9147	1.01626	0.755814	1.3661	FLG2	nonsynonymous SNV	FLG2:NM_001014342:exon3:c.G410A:p.G137E	0.0189	0.987	24.1	5.62	.
11:9051475:G:C	rs3751057	11	9051475	G	C	G	0.9147	1.00908	0.854191	1.19196	SCUBE2	nonsynonymous SNV	SCUBE2:NM_001170690:exon15:c.C1994G:p.T665S,SCUBE2:NM_001330199:exon18:c.C2372G:p.T791S,SCUBE2:NM_020974:exon18:c.C2288G:p.T763S	0.0701	0.998	28	5.19	Growth factor receptor cysteine-rich domain|Tyrosine-protein kinase ephrin type A/B receptor-like;Tyrosine-protein kinase ephrin type A/B receptor-like
11:1267631:C:T	rs202037574	11	1267631	C	T	T	0.9157	1.014	0.778334	1.32128	MUC5B	nonsynonymous SNV	MUC5B:NM_002458:exon31:c.C9521T:p.T3174M	0.0335	0.987	7.367	0.162	.
14:54417522:A:G	rs17563	14	54417522	A	G	G	0.917	1.004	0.924668	1.09016	BMP4	nonsynonymous SNV	BMP4:NM_001347914:exon3:c.T455C:p.V152A,BMP4:NM_001347915:exon3:c.T266C:p.V89A,BMP4:NM_001202:exon4:c.T455C:p.V152A,BMP4:NM_001347912:exon4:c.T596C:p.V199A,BMP4:NM_001347913:exon4:c.T266C:p.V89A,BMP4:NM_001347916:exon4:c.T455C:p.V152A,BMP4:NM_001347917:exon4:c.T266C:p.V89A,BMP4:NM_130850:exon4:c.T455C:p.V152A,BMP4:NM_130851:exon4:c.T455C:p.V152A	0.583	0.002	9.335	4.05	Transforming growth factor-beta, N-terminal
3:195518330:C:G	rs3107764	3	195518330	C	G	C	0.9176	1.00503	0.916567	1.10199	MUC4	nonsynonymous SNV	MUC4:NM_018406:exon2:c.G121C:p.A41P	0.5957	0.006	0.001	-5.93	.
7:44147485:C:A	rs2537188	7	44147485	C	A	A	0.9184	1.005	0.920167	1.09768	AEBP1	nonsynonymous SNV	AEBP1:NM_001129:exon5:c.C817A:p.P273T	0.383	0.039	6.6	1.41	.
7:100550191:C:T	rs35523587	7	100550191	C	T	T	0.9192	1.006	0.889158	1.13824	MUC3A	nonsynonymous SNV	MUC3A:NM_005960:exon2:c.C772T:p.P258S	0.3035	.	5.825	1.26	.
5:177683377:T:C	rs890802	5	177683377	T	C	T	0.9197	1.00503	0.918365	1.09983	COL23A1	nonsynonymous SNV	COL23A1:NM_173465:exon15:c.A859G:p.T287A	0.497	0.024	0.001	-8.84	.
3:100548484:T:C	rs36077176	3	100548484	T	C	C	0.9204	1.005	0.904078	1.11722	ABI3BP	nonsynonymous SNV	ABI3BP:NM_001349330:exon28:c.A2141G:p.H714R,ABI3BP:NM_001349329:exon30:c.A2291G:p.H764R	0.2149	0	1.005	-6	.
12:10069302:C:T	rs526680	12	10069302	C	T	C	0.9204	1.00402	0.922858	1.09229	CLEC2A	nonsynonymous SNV	CLEC2A:NM_001130711:exon4:c.G407A:p.G136D,CLEC2A:NM_207375:exon4:c.G407A:p.G136D	0.6643	0	0.115	-4.9	C-type lectin|C-type lectin fold|C-type lectin-like
15:43585039:C:G	rs149443794	15	43585039	C	G	G	0.9216	1.027	0.608158	1.73207	TGM7	nonsynonymous SNV	TGM7:NM_052955:exon3:c.G307C:p.V103L	0.0204	0.767	23	5.32	Immunoglobulin E-set|Immunoglobulin-like fold|Transglutaminase, N-terminal
1:53544513:C:T	rs12567021	1	53544513	C	T	C	0.923	1.01937	0.685971	1.51425	PODN	nonsynonymous SNV	PODN:NM_153703:exon8:c.C1475T:p.T492M,PODN:NM_001199081:exon9:c.C1418T:p.T473M,PODN:NM_001199080:exon10:c.C1418T:p.T473M	0.0237	0.681	19.36	2.89	Leucine-rich repeat domain, L domain-like
5:156918850:C:T	rs2287749	5	156918850	C	T	T	0.9254	1.006	0.892651	1.13378	ADAM19	nonsynonymous SNV	ADAM19:NM_033274:exon17:c.G1979A:p.G660D	0.1324	0.91	24.3	5.23	EGF-like domain
10:124380869:C:A	rs201533269	10	124380869	C	A	C	0.9256	1.00908	0.827025	1.23358	DMBT1	nonsynonymous SNV	DMBT1:NM_004406:exon28:c.C3310A:p.H1104N,DMBT1:NM_017579:exon40:c.C5164A:p.H1722N,DMBT1:NM_001320644:exon41:c.C5194A:p.H1732N,DMBT1:NM_007329:exon41:c.C5194A:p.H1732N	0.0807	0.209	0.002	-7.19	SRCR domain|SRCR-like domain
10:124380870:A:G	rs199679394	10	124380870	A	G	A	0.9256	1.00908	0.827025	1.23358	DMBT1	nonsynonymous SNV	DMBT1:NM_004406:exon28:c.A3311G:p.H1104R,DMBT1:NM_017579:exon40:c.A5165G:p.H1722R,DMBT1:NM_001320644:exon41:c.A5195G:p.H1732R,DMBT1:NM_007329:exon41:c.A5195G:p.H1732R	0.0809	0.001	0.001	-6.57	SRCR domain|SRCR-like domain
15:84611805:C:T	rs61752778	15	84611805	C	T	T	0.9257	1.013	0.768465	1.33557	ADAMTSL3	nonsynonymous SNV	ADAMTSL3:NM_001301110:exon19:c.C2461T:p.P821S,ADAMTSL3:NM_207517:exon19:c.C2461T:p.P821S	0.0202	0.754	24.4	5.08	.
10:102744376:T:C	rs11190780	10	102744376	T	C	C	0.9275	1.006	0.887417	1.14047	SEMA4G	nonsynonymous SNV	SEMA4G:NM_001203244:exon14:c.T1835C:p.M612T	0.1021	0	0.082	1.35	Immunoglobulin subtype|Immunoglobulin-like domain|Immunoglobulin-like fold
11:1267670:G:A	rs117757264	11	1267670	G	A	G	0.9281	1.01215	0.785967	1.30322	MUC5B	nonsynonymous SNV	MUC5B:NM_002458:exon31:c.G9560A:p.R3187Q	0.0377	0.046	0.771	-4.4	.
19:40199914:C:G	rs10755	19	40199914	C	G	G	0.9283	1.004	0.921051	1.09444	LGALS14	nonsynonymous SNV	LGALS14:NM_020129:exon4:c.C381G:p.F127L,LGALS14:NM_203471:exon5:c.C468G:p.F156L	0.6868	0	3.11	-0.278	Concanavalin A-like lectin/glucanase domain|Galectin, carbohydrate recognition domain
9:95277356:C:T	rs34758505	9	95277356	C	T	C	0.9284	1.00908	0.831071	1.22512	ECM2	nonsynonymous SNV	ECM2:NM_001197295:exon4:c.G545A:p.R182Q,ECM2:NM_001197296:exon4:c.G545A:p.R182Q,ECM2:NM_001393:exon4:c.G611A:p.R204Q	0.0433	0	0.827	0.919	.
1:53535478:G:A	rs1288386	1	53535478	G	A	G	0.929	1.00503	0.902307	1.11941	PODN	nonsynonymous SNV	PODN:NM_153703:exon2:c.G95A:p.R32H,PODN:NM_001199081:exon3:c.G38A:p.R13H,PODN:NM_001199080:exon4:c.G38A:p.R13H	0.4155	0.345	11.45	1.03	.
10:102824349:G:C	rs807037	10	102824349	G	C	C	0.9306	1.004	0.921051	1.09444	KAZALD1	nonsynonymous SNV	KAZALD1:NM_001319303:exon4:c.G350C:p.G117A,KAZALD1:NM_030929:exon4:c.G764C:p.G255A	0.667	0	10.23	5.53	Immunoglobulin I-set|Immunoglobulin subtype 2|Immunoglobulin-like domain|Immunoglobulin-like fold
11:1278796:G:A	rs55657020	11	1278796	G	A	G	0.9311	1.01317	0.749132	1.37004	MUC5B	nonsynonymous SNV	MUC5B:NM_002458:exon41:c.G16306A:p.V5436M	0.0397	0.83	11.71	0.711	VWFC domain
[truncated: 131 more rows]
